# Supplementary material for: A Genome-Wide CRISPR Screen Identifies Factors Regulating Pluripotency Exit in Mouse Embryonic Stem Cells
Source: Cells. 2022 Jul 25;11(15):2289. doi: 10.3390/cells11152289 (PMC9331787; doi:10.3390/cells11152289)

A

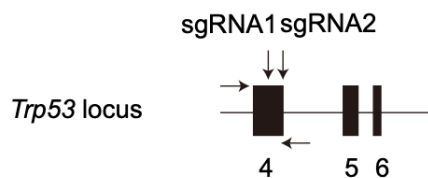

genome: 5'-ccctgtgcagttgtgggtcagcgccacacctccagctgggagccgtgtccgcgcca-3'

*Trp53*-KO-1: 5'-ccctgtgc-----ggtcagcgccacacctccagctgggagccgtgtccgcgcca-3' -8

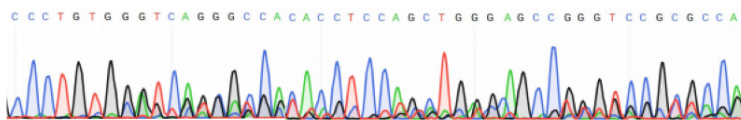

*Trp53*-KO-2: 5'-ccctgtg-----gtgatggtaaa -3' -123

C C C T G T G G C G T G A T G G T A A G I

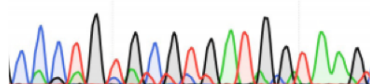

*Trp53*-KO-3: 5'-ccctgtgcagt-----gtgatgg -3' -120

C C C T G T G C A G T G T G A T G G

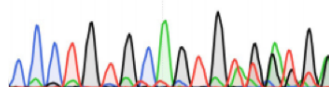

C

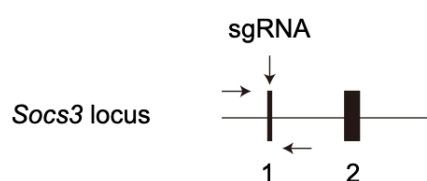

genome: 5'-aggctctttgcctgattcgcgccaggagtgcgccctcatcgcccgaggagcag-3

*Socs3*-KO-1: 5'-aggctcttt-----ccaggagtgcgccctcatcgcccgaggagcag-3' +1 -10

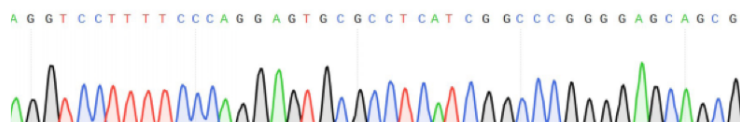

*Socs3*-KO-2: 5'-aggctctttgcctga-----aggagtgcgccctcatcgcccgaggagcag-3' -7

A G G T C C T T T T G C C T G A A G G A G T G C G C C T C A T C G G C C C G G G G A G C A G

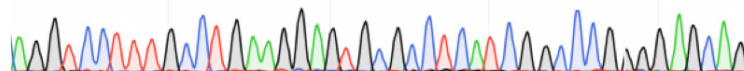

*Socs3*-KO-3: 5'-aggctctttgcctgattcgaat-caggagtgcgccctcatcgcccgaggagcag-3' +3 -2

A G G T C C T T T T G C C T G A T T C G A A T C A G G A G T G C G C C T C A T C G G C C C G G G G A G C A G

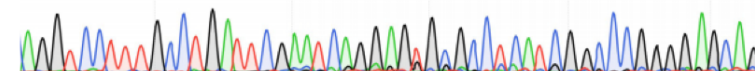

B

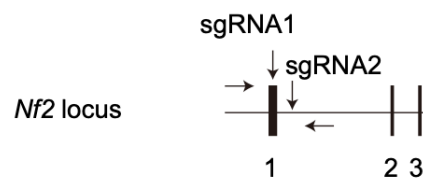

genome: 5'-cccaagacattcacggtgcggatcgatccatggacgcccagatgg-3'

*Nf2*-KO-1: 5'-cccaag-----gacgcccagatgg-3' -27

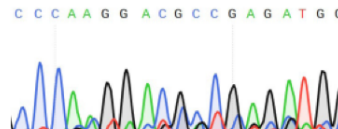

*Nf2*-KO-2: 5'-cccaag--attcacggtgcggatcgatccatggacgcccagatgg-3' -2

C C C A A G A T T C A C G G T G C G G A T C G T C A C C A T G G A C G C C G A G A T G G

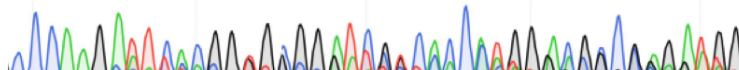

genome: 5'-ccctcgctgtggtgacagtcgaagtgcgaagttaaggattccgtatataac-3'

*Nf2*-KO-3: 5'-ccctcgctg-----tccgtatataac-3' -31

C C C T C G C T G C C A T G A C A T G C G G A G A G A A C G T A A T G G A A T T T C A A A G A A A T C C I T A T A T A T C

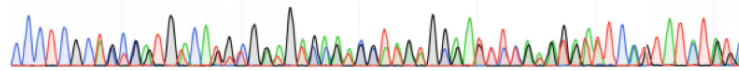

D

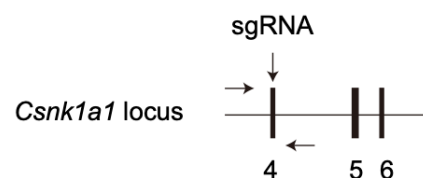

genome: 5'-aaattgaatatgctgaattgcttatgagattgtgtagagataagtca-3'

*Csnk1a1*-KO-1: 5'-aaattgaatatgc-----tgctagagataagtca-3' -17

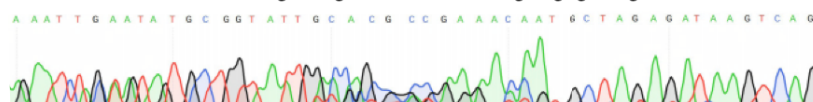

*Csnk1a1*-KO-2: 5'-aaattgaatatgctgtaat-----tgctagagataagtca-3' -15

A A A T T G T A T A T G C T G T A T G A C G G G C T G A A A C A A T G C T A G A G A T A A G T C A

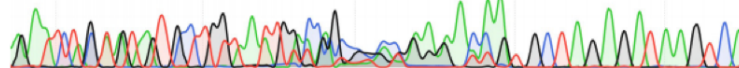

*Csnk1a1*-KO-1: 5'-aaattgaatatgctgta-----tgctagagataagtca-3' -17

A A A T T G A A T A T G C T G T A A T G C G G G C C G A A A C A A T G C T A G A G A T A A G T C A

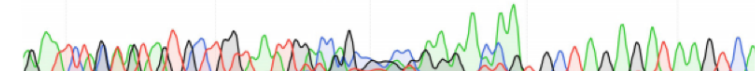

Supplement: Supplementary file 1 [file cells-11-02289-s001.zip › Figure S5.pdf]
