# Supplementary material for: A Genome-Wide CRISPR Screen Identifies Factors Regulating Pluripotency Exit in Mouse Embryonic Stem Cells
Source: Cells. 2022 Jul 25;11(15):2289. doi: 10.3390/cells11152289 (PMC9331787; doi:10.3390/cells11152289)
Supplement: Supplementary file 1 [file cells-11-02289-s001.zip]

Archive with 14 entries (14 files):
- Figure S1.pdf
- Figure S2.pdf
- Figure S3.pdf
- Figure S4.pdf
- Figure S5.pdf
- Figure S6.pdf
- Figure S7.pdf
- Figure S8.pdf
- Supplemental Figures legends.pdf
- Table S1.xlsx
- Table S2.xlsx
- Table S3.xlsx
- Table S4.xlsx
- Table S5.xlsx
