# Supplementary material for: A Genome-Wide CRISPR Screen Identifies Factors Regulating Pluripotency Exit in Mouse Embryonic Stem Cells
Source: Cells. 2022 Jul 25;11(15):2289. doi: 10.3390/cells11152289 (PMC9331787; doi:10.3390/cells11152289)
Supplement: Supplementary file 1 [file cells-11-02289-s001.zip › Table S1.xlsx]

## Sheet: Genotyping primers
Gene	For primer	Re primer
Socs3	GCGGCTCTAACTCTGACTCT	TCCTTCCTACCTAGTCCCGA
Trp53	GTCCCAGTCCTCTCTTTGCT	AGGCTGGAGTCAACTGTCTC
Tsc1	CACTCTACCGCCTAGCCATC	CCTCATCTGTGGGTTAACTATGG
Nf2	CAGCCTAGGTCTGTCTCGG	GCACACCGGTTCGTTTCTAC
Csnk1a1	GTTCTCGCGCTGTCATTACA	AAATCTCATTAAAAAGCCCTTGG
Zfp771	TTCGGCCACCGTTCCAACCT	TTCCCACCCACCTCACTTAC
Olfr769	ACAACATTCATCCTGCTGGG	GATGGTGGTGTAGTGCAAGG
4930519G04Rik	GTCCACTCCACACACGTTTC	CAATGTCTGACCTGGATTCCC
Fam24a	TCTTTGGGACTGAAGCCACT	CTGTCCAGGTTGAGAGCAGT
Pfkfb4	ACTCATTGTCATGGTGGGCC	TTCCAGGCCCTGTCACAC
Slitrk6	CTGTGCCCCTGTCAGTTCTA	TGCCAAGTTGCTGAAGTTCC
Pcdhb19	GTGTGCTCCATTTCCAGGTG	GTCTAAATCCCAAGCCGAGG
Fam131c	TATGTCCGTTCTGTGCCCTT	CAGTCCAATCCAGAGCCTCA
Mapkbp1	TAACCTCTGCTGACACTGGT	CCAGCCTACTCACCTTCCAG
Kxd1	CTCTCAGGGATTAGCTCGGG	CTGGGAGGTGATAGGCAGAG
Olfr1200	ATGTTGATTGTCACGGCCTG	AACCCCAAATTTGACAGCCG
Pid1	TCTACCACAGGCATGCAGTT	AACTCCTTGCCCAAATGCTG
Tab1	CTGTCCTGCCACCTCTGTAT	AGCCTCTCTTCCCAGTGATG
Tcf7l1	CAACCAGTGGAGGGGACG	CGATGGGAGGAGAGCAGG
Dhx30	ACATTCCCAACCTGTCCTGG	GCCAAGCTACACAGTGAGAC
Zc3h11a	CAGGGTGTTTGTTGAGCAGG	AAATCCGACAGCCTCTTCCT
Nos3	TTGTGTCCCCTGTTCTGGTT	CCCTGGTATCTATCGTGCCA
Olfr620	TATGTGACGGTGTTCCTGGG	CTTCCCAAAGCGGTGAACC
Stox2	GGAGTTTTGCTTGCCGAGAT	CACCCCGCAATGTTCCTTTA

## Sheet: RT-qPCR primers
Gene	For primer	Re primer
Oct4	TAGGTGAGCCGTCTTTCCAC	GCTTAGCCAGGTTCGAGGAT
Sox2	ATTTAGAGCTAGACTCCGGGCGAT	CTCCTTCCTTGTTTGTAACGGTCC
Nanog	TTGCTTACAAGGGTCTGCTACT	ACTGGTAGAAGAATCAGGGCT
Rex1	TTGGGGCGAGCTCATTACTT	TTGCCACACTCTGCACACAC
Gapdh	CTTCAACAGCAACTCCCACTC	CCTGTTGCTGTAGCCGTATTC
Stat3	GAGAAGCCAATGGAAATTGC	TCAAAGTCGTCCTGGAGGTT
Akt1	CCTTTATTGGCTACAAGGAACGG	GAAGGTGCGCTCAATGACTG
Apc	GGCGTGAAATCCGAGTCCTTC	CCACCTGCAATAACTCTGCAA
