# Supplementary material for: A Genome-Wide CRISPR Screen Identifies Factors Regulating Pluripotency Exit in Mouse Embryonic Stem Cells
Source: Cells. 2022 Jul 25;11(15):2289. doi: 10.3390/cells11152289 (PMC9331787; doi:10.3390/cells11152289)
Supplement: Supplementary file 1 [file cells-11-02289-s001.zip › Table S2.xlsx]

## Sheet: FACS-1
gene	unique.id	count	name
ENSMUSG00000030859	MGLibA_17519	355628	Fam24a
ENSMUSG00000025648	MGLibB_40490	326189	Pfkfb4
ENSMUSG00000053113	MGLibA_50507	68733	Socs3
ENSMUSG00000053113	MGLibA_50508	62045	Socs3
ENSMUSG00000045871	MGLibA_49899	61475	Slitrk6
mmu-mir-3080	MGLibA_63385	57577	mmu-mir-3080
ENSMUSG00000043313	MGLibB_39793	51747	Pcdhb19
ENSMUSG00000006218	MGLibB_17141	47136	Fam131c
ENSMUSG00000033902	MGLibA_30397	37446	Mapkbp1
ENSMUSG00000055553	MGLibA_28288	32294	Kxd1
ENSMUSG00000079698	MGLibA_58898	28672	Vmn2r93
ENSMUSG00000059552	MGLibB_56015	27240	Trp53
ENSMUSG00000102976	MGLibA_60156	24360	Zc3h11a
ENSMUSG00000032480	MGLibA_14112	14951	Dhx30
ENSMUSG00000092118	MGLibA_17763	14514	Fancf
ENSMUSG00000022414	MGLibA_52512	13052	Tab1
ENSMUSG00000053113	MGLibB_50492	12519	Socs3
ENSMUSG00000031809	MGLibA_00349	11754	1700018B08Rik
ENSMUSG00000075115	MGLibB_35939	11217	Olfr1200
ENSMUSG00000042363	MGLibB_28819	10682	Lgalsl
ENSMUSG00000033998	MGLibB_27029	9120	Kcnk1
ENSMUSG00000059552	MGLibA_56035	7941	Trp53
ENSMUSG00000021096	MGLibA_42218	6914	Ppm1a
ENSMUSG00000027977	MGLibA_33511	6439	Ndst3
ENSMUSG00000054905	MGLibA_51744	6054	Stfa3
ENSMUSG00000046182	MGLibB_23118	5304	Gsg1l
ENSMUSG00000015627	MGLibB_19512	3825	Gata5
ENSMUSG00000052581	MGLibA_29616	3493	Lrrtm4
ENSMUSG00000038143	MGLibB_51846	3405	Stox2
ENSMUSG00000028978	MGLibB_34418	3361	Nos3
ENSMUSG00000045132	MGLibB_37884	3015	Olfr620
ENSMUSG00000009073	MGLibA_33838	2319	Nf2
ENSMUSG00000030842	MGLibA_28431	2302	Lamtor1
ENSMUSG00000028062	MGLibA_28433	2013	Lamtor2
ENSMUSG00000048216	MGLibA_22783	2000	Gpr85
mmu-mir-326	MGLibA_65558	1994	mmu-mir-326
ENSMUSG00000025466	MGLibA_19071	1989	Fuom
ENSMUSG00000063234	MGLibB_22774	1839	Gpr84
ENSMUSG00000091512	MGLibB_28426	1608	Lamtor3
ENSMUSG00000062937	MGLibA_32405	1568	Mtap
ENSMUSG00000026638	MGLibA_26317	1362	Irf6
ENSMUSG00000026564	MGLibA_15098	1132	Dusp27
ENSMUSG00000061702	MGLibB_54895	1061	Tmem91
ENSMUSG00000037790	MGLibB_13864	1010	Defb7
ENSMUSG00000044897	MGLibA_38401	1008	Olfr821
ENSMUSG00000001419	MGLibB_30889	917	Mef2d
ENSMUSG00000041556	MGLibB_17972	891	Fbxo2
ENSMUSG00000094928	MGLibB_00586	868	1700122O11Rik
ENSMUSG00000000753	MGLibA_47957	848	Serpinf1
ENSMUSG00000046470	MGLibB_50607	807	Sox18
ENSMUSG00000046532	MGLibA_05354	798	Ar
ENSMUSG00000042380	MGLibB_50077	773	Smim12
ENSMUSG00000070336	MGLibB_18021	710	Fbxo47
ENSMUSG00000074378	MGLibB_07259	674	Bsph1
ENSMUSG00000031479	MGLibA_58993	557	Vps36
ENSMUSG00000039323	MGLibA_25569	539	Igfbp2
ENSMUSG00000033478	MGLibB_17219	521	Fam160b1
ENSMUSG00000016458	MGLibB_59637	464	Wt1
ENSMUSG00000021096	MGLibB_42204	455	Ppm1a
ENSMUSG00000025790	MGLibA_49824	427	Slco3a1
ENSMUSG00000037225	MGLibA_18338	423	Fgf2
ENSMUSG00000067150	MGLibA_59792	423	Xpo5
ENSMUSG00000021373	MGLibA_07914	392	Cap2
ENSMUSG00000032633	MGLibA_18544	387	Flcn
ENSMUSG00000055436	MGLibB_51360	385	Srsf11
ENSMUSG00000022347	MGLibB_01912	381	A1bg
ENSMUSG00000020196	MGLibB_07617	375	Cabin1
NonTargetingControlGuideForMouse	0745_MGLibA_67150	375	NonTargetingControlGuideForMouse
NonTargetingControlGuideForMouse	0745_MGLibB_62549	362	NonTargetingControlGuideForMouse
ENSMUSG00000003868	MGLibB_46747	349	Ruvbl2
ENSMUSG00000021482	MGLibB_02202	339	Aaed1
ENSMUSG00000073802	MGLibB_09614	320	Cdkn2b
ENSMUSG00000024576	MGLibB_12129	315	Csnk1a1
ENSMUSG00000028062	MGLibB_28423	314	Lamtor2
ENSMUSG00000026812	MGLibA_56143	263	Tsc1
ENSMUSG00000059791	MGLibA_34782	256	Nrm
ENSMUSG00000031568	MGLibB_46763	224	Rwdd4a
ENSMUSG00000061458	MGLibB_34348	221	Nol10
ENSMUSG00000009073	MGLibA_33840	211	Nf2
ENSMUSG00000074059	MGLibA_18075	195	Fbxw18
ENSMUSG00000009079	MGLibA_16778	191	Ewsr1
ENSMUSG00000029564	MGLibB_01333	189	4930519G04Rik
ENSMUSG00000042801	MGLibA_38265	182	Olfr769
ENSMUSG00000026934	MGLibB_28883	173	Lhx3
ENSMUSG00000064213	MGLibB_13725	173	Defa24
ENSMUSG00000056367	MGLibA_02853	169	Actr3b
ENSMUSG00000054716	MGLibA_61183	168	Zfp771
ENSMUSG00000057230	MGLibB_02208	156	Aak1
Defa6	MGLibB_13746	155	Defa6
ENSMUSG00000030717	MGLibB_35158	155	Nupr1
ENSMUSG00000059552	MGLibB_56013	154	Trp53
ENSMUSG00000038421	MGLibA_18176	152	Fcrla
ENSMUSG00000020196	MGLibB_07618	149	Cabin1
ENSMUSG00000009900	MGLibA_59595	141	Wnt3a
ENSMUSG00000043388	MGLibA_54305	123	Tmem130
ENSMUSG00000045126	MGLibB_36591	122	Olfr1445
ENSMUSG00000032572	MGLibA_11365	113	Col6a4
ENSMUSG00000071451	MGLibB_43505	105	Psmg4
ENSMUSG00000052102	MGLibA_22289	96	Gnpda1
ENSMUSG00000024082	MGLibB_33571	82	Ndufaf7
ENSMUSG00000029452	MGLibA_54264	54	Tmem116
ENSMUSG00000062190	MGLibA_28449	54	Lancl2
ENSMUSG00000040123	MGLibA_61618	45	Zmym5
ENSMUSG00000029922	MGLibB_31410	41	Mkrn1
ENSMUSG00000072680	MGLibB_54664	41	Tmem254c
ENSMUSG00000021944	MGLibB_19509	39	Gata4
ENSMUSG00000089892	MGLibA_35938	39	Olfr1199
ENSMUSG00000072676	MGLibB_54658	37	Tmem254a
ENSMUSG00000022220	MGLibA_03146	36	Adcy4
ENSMUSG00000021552	MGLibA_20042	35	Gkap1
ENSMUSG00000030666	MGLibB_07775	35	Calcb
ENSMUSG00000041992	MGLibB_44522	35	Rapgef5
ENSMUSG00000020916	MGLibB_28026	34	Krt36
ENSMUSG00000027246	MGLibB_15958	34	Ell3
ENSMUSG00000031378	MGLibB_02361	34	Abcd1
ENSMUSG00000042589	MGLibA_12505	34	Cux2
ENSMUSG00000059547	MGLibA_18092	32	Fbxw26
ENSMUSG00000068922	MGLibB_32359	32	Msto1
mmu-mir-7082	MGLibA_65897	32	mmu-mir-7082
ENSMUSG00000031508	MGLibA_04207	31	Ankrd10
ENSMUSG00000044068	MGLibB_61689	31	Zrsr1
ENSMUSG00000021867	MGLibB_54661	30	Tmem254b
ENSMUSG00000047259	MGLibB_30597	30	Mc4r
ENSMUSG00000091879	MGLibA_58650	30	Vmn2r17
ENSMUSG00000096822	MGLibB_37206	30	Olfr344
ENSMUSG00000045306	MGLibB_38186	29	Olfr734
ENSMUSG00000022952	MGLibA_46742	28	Runx1
ENSMUSG00000029282	MGLibB_04048	28	Amtn
ENSMUSG00000029669	MGLibB_56206	28	Tspan12
ENSMUSG00000070313	MGLibB_02000	28	A630095E13Rik
ENSMUSG00000078442	MGLibB_08303	28	Ccdc105
ENSMUSG00000109449	MGLibB_36167	28	Olfr1280
ENSMUSG00000028420	MGLibA_54745	27	Tmem38b
ENSMUSG00000032526	MGLibB_13684	27	Deb1
ENSMUSG00000034041	MGLibB_29825	27	Lyl1
ENSMUSG00000034329	MGLibB_07203	27	Brip1
ENSMUSG00000048938	MGLibB_34647	27	Nr1h5
ENSMUSG00000051528	MGLibB_37384	27	Olfr424
mmu-mir-3960	MGLibA_64337	27	mmu-mir-3960
ENSMUSG00000025701	MGLibB_03905	26	Alox5
ENSMUSG00000044550	MGLibA_53080	26	Tceal3
ENSMUSG00000052642	MGLibB_01318	26	4930504O13Rik
ENSMUSG00000099077	MGLibA_42418	26	Ppp2r3d
ENSMUSG00000024055	MGLibA_12949	25	Cyp4f13
ENSMUSG00000038515	MGLibB_23071	25	Grtp1
ENSMUSG00000040511	MGLibA_43918	25	Pvr
ENSMUSG00000048013	MGLibB_28021	25	Krt35
ENSMUSG00000003955	MGLibA_17236	24	Fam162a
ENSMUSG00000029456	MGLibB_02528	24	Acad10
ENSMUSG00000030469	MGLibB_61112	24	Zfp719
ENSMUSG00000054517	MGLibB_55851	24	Trim65
ENSMUSG00000063230	MGLibB_37664	24	Olfr535
ENSMUSG00000004945	MGLibB_54632	23	Tmem242
ENSMUSG00000026694	MGLibB_30997	23	Mettl13
ENSMUSG00000029145	MGLibB_15778	23	Eif2b4
ENSMUSG00000029438	MGLibB_06728	23	Bcl7a
ENSMUSG00000031233	MGLibB_40558	23	Pgk2
ENSMUSG00000032850	MGLibB_45988	23	Rnft2
ENSMUSG00000034424	MGLibA_19672	23	Gcsh
ENSMUSG00000041700	MGLibA_28864	23	Lhfpl1
ENSMUSG00000062426	MGLibB_37105	23	Olfr304
ENSMUSG00000067615	MGLibA_28088	23	Krt81
ENSMUSG00000070382	MGLibA_37326	23	Olfr391-ps
mmu-mir-3106	MGLibA_65662	23	mmu-mir-3106
D4Wsu53e	MGLibB_13142	22	D4Wsu53e
ENSMUSG00000001774	MGLibA_10281	22	Chordc1
ENSMUSG00000008140	MGLibB_16034	22	Emc10
ENSMUSG00000009073	MGLibB_33830	22	Nf2
ENSMUSG00000020521	MGLibA_45996	22	Rnft1
ENSMUSG00000022357	MGLibA_27649	22	Klhl38
ENSMUSG00000026409	MGLibA_40495	22	Pfkfb2
ENSMUSG00000027248	MGLibB_40200	22	Pdia3
ENSMUSG00000028811	MGLibB_59841	22	Yars
ENSMUSG00000032171	MGLibB_41003	22	Pin1
ENSMUSG00000050071	MGLibB_06820	22	Bex1
ENSMUSG00000061798	MGLibB_35946	22	Olfr1204
ENSMUSG00000079834	MGLibB_54926	22	Tmlhe
ENSMUSG00000090619	MGLibA_58793	22	Vmn2r60
mmu-mir-574	MGLibA_64988	22	mmu-mir-574
Wibg	MGLibA_59526	22	Wibg
Adc	MGLibB_03169	21	Adc
ENSMUSG00000022101	MGLibA_18318	21	Fgf17
ENSMUSG00000023185	MGLibA_09691	21	Ceacam14
ENSMUSG00000025231	MGLibA_52015	21	Sufu
ENSMUSG00000028367	MGLibB_56690	21	Txn1
ENSMUSG00000032537	MGLibB_16334	21	Ephb1
ENSMUSG00000033196	MGLibA_32846	21	Myh2
ENSMUSG00000033458	MGLibA_17742	21	Fan1
ENSMUSG00000034282	MGLibA_16769	21	Evpl
ENSMUSG00000034402	MGLibB_26942	21	Kcnh5
ENSMUSG00000035248	MGLibB_60232	21	Zcchc6
ENSMUSG00000038605	MGLibB_46919	21	Samd10
ENSMUSG00000040167	MGLibB_25675	21	Ikzf5
ENSMUSG00000040759	MGLibB_10991	21	Cmtm5
ENSMUSG00000041836	MGLibB_43776	21	Ptpre
ENSMUSG00000047694	MGLibB_59890	21	Yipf6
ENSMUSG00000050534	MGLibB_25124	21	Htr5b
ENSMUSG00000059669	MGLibA_52583	21	Taf1b
C1s	MGLibB_07488	20	C1s
ENSMUSG00000003344	MGLibA_07295	20	Btbd2
ENSMUSG00000006526	MGLibB_54243	20	Tmem110
ENSMUSG00000024544	MGLibA_28699	20	Ldlrad4
ENSMUSG00000028111	MGLibA_12408	20	Ctsk
ENSMUSG00000029602	MGLibB_44570	20	Rasal1
ENSMUSG00000029711	MGLibB_16378	20	Epo
ENSMUSG00000030245	MGLibA_22351	20	Golt1b
ENSMUSG00000031893	MGLibA_56212	20	Tsnaxip1
ENSMUSG00000032298	MGLibA_33702	20	Neil1
ENSMUSG00000049555	MGLibB_54920	20	Tmie
ENSMUSG00000050994	MGLibB_03180	20	Adgb
ENSMUSG00000056310	MGLibB_56768	20	Tyw1
ENSMUSG00000060177	MGLibA_27712	20	Klk1b22
ENSMUSG00000075120	MGLibB_35919	20	Olfr1196
ENSMUSG00000075314	MGLibA_20597	20	Gm1322
ENSMUSG00000089984	MGLibB_17958	20	Fbxo24
ENSMUSG00000093901	MGLibB_38545	20	Olfr893
ENSMUSG00000001729	MGLibA_03719	19	Akt1
ENSMUSG00000005540	MGLibB_18117	19	Fcer2a
ENSMUSG00000005718	MGLibA_53539	19	Tfap4
ENSMUSG00000020431	MGLibB_03136	19	Adcy1
ENSMUSG00000021565	MGLibA_49662	19	Slc6a19
ENSMUSG00000022285	MGLibA_59975	19	Ywhaz
ENSMUSG00000022897	MGLibB_15207	19	Dyrk1a
ENSMUSG00000023942	MGLibA_49199	19	Slc29a1
ENSMUSG00000024975	MGLibB_40053	19	Pdcd4
ENSMUSG00000027577	MGLibB_10339	19	Chrna4
ENSMUSG00000027865	MGLibA_19685	19	Gdap2
ENSMUSG00000028107	MGLibA_52710	19	Tars2
ENSMUSG00000032558	MGLibA_34536	19	Nphp3
ENSMUSG00000034463	MGLibB_47137	19	Scara3
ENSMUSG00000040945	MGLibB_44921	19	Rcc2
ENSMUSG00000041660	MGLibA_06590	19	Bbox1
ENSMUSG00000043753	MGLibB_14349	19	Dmrta1
ENSMUSG00000044349	MGLibA_50304	19	Snhg11
ENSMUSG00000044768	MGLibB_13106	19	D1Ertd622e
ENSMUSG00000046500	MGLibB_17403	19	Fam19a4
ENSMUSG00000051329	MGLibA_35106	19	Nup160
ENSMUSG00000057173	MGLibB_45235	19	Rfx8
ENSMUSG00000057513	MGLibB_58096	19	Vmn1r177
ENSMUSG00000092486	MGLibB_00949	19	2610524H06Rik
ENSMUSG00000094081	MGLibB_21119	19	Gm20826
ENSMUSG00000096520	MGLibA_21282	19	Gm3376
mmu-mir-7000	MGLibA_64399	19	mmu-mir-7000
ENSMUSG00000002803	MGLibB_07300	18	Btbd6
ENSMUSG00000016194	MGLibB_24906	18	Hsd11b1
ENSMUSG00000020317	MGLibB_53704	18	Theg
ENSMUSG00000027864	MGLibB_43620	18	Ptgfrn
ENSMUSG00000029223	MGLibA_57117	18	Uchl1
ENSMUSG00000032492	MGLibA_43658	18	Pth1r
ENSMUSG00000034024	MGLibB_08961	18	Cct2
ENSMUSG00000035234	MGLibA_17302	18	Fam175a
ENSMUSG00000036480	MGLibB_43252	18	Prss56
ENSMUSG00000045996	MGLibB_41901	18	Polr2k
ENSMUSG00000046056	MGLibA_47099	18	Sbsn
ENSMUSG00000046876	MGLibA_05990	18	Atxn1
ENSMUSG00000049154	MGLibB_17325	18	Fam183b
ENSMUSG00000051590	MGLibA_30262	18	Map3k19
ENSMUSG00000052922	MGLibB_07125	18	Bpi
ENSMUSG00000052928	MGLibB_12304	18	Ctif
ENSMUSG00000057729	MGLibB_43268	18	Prtn3
ENSMUSG00000058715	MGLibB_18115	18	Fcer1g
ENSMUSG00000064326	MGLibB_48554	18	Siva1
ENSMUSG00000069515	MGLibA_29911	18	Lyz1
ENSMUSG00000070375	MGLibB_37355	18	Olfr406
ENSMUSG00000079509	MGLibB_61456	18	Zfx
ENSMUSG00000089832	MGLibA_48412	18	Shkbp1
ENSMUSG00000092162	MGLibB_58854	18	Vmn2r86
Gpr128	MGLibA_22567	18	Gpr128
mmu-mir-1969	MGLibA_65704	18	mmu-mir-1969
mmu-mir-6401	MGLibA_65599	18	mmu-mir-6401
mmu-mir-7047	MGLibA_65382	18	mmu-mir-7047
mmu-mir-7677	MGLibA_63648	18	mmu-mir-7677
1810033B17Rik	MGLibA_00638	17	1810033B17Rik
ENSMUSG00000007080	MGLibA_41841	17	Pole
ENSMUSG00000007777	MGLibA_00005	17	0610009B22Rik
ENSMUSG00000013415	MGLibA_25546	17	Igf2bp1
ENSMUSG00000019877	MGLibA_47772	17	Serinc1
ENSMUSG00000022772	MGLibB_47711	17	Senp5
ENSMUSG00000024558	MGLibA_30361	17	Mapk4
ENSMUSG00000026219	MGLibB_55905	17	Trip12
ENSMUSG00000028439	MGLibA_17476	17	Fam219a
ENSMUSG00000029309	MGLibB_50734	17	Sparcl1
ENSMUSG00000031297	MGLibA_49722	17	Slc7a3
ENSMUSG00000033618	MGLibB_30246	17	Map3k13
ENSMUSG00000038525	MGLibA_05185	17	Armc10
ENSMUSG00000052131	MGLibB_03674	17	Akr1b7
ENSMUSG00000068392	MGLibB_45700	17	Rnase13
ENSMUSG00000086815	MGLibB_01079	17	3110082J24Rik
ENSMUSG00000092008	MGLibB_12812	17	Cyp2c69
ENSMUSG00000094819	MGLibB_37676	17	Olfr53
ENSMUSG00000109718	MGLibA_55863	17	Trim61
mmu-mir-703	MGLibA_65016	17	mmu-mir-703
ENSMUSG00000003423	MGLibA_40933	16	Pih1d1
ENSMUSG00000021575	MGLibB_03505	16	Ahrr
ENSMUSG00000022986	MGLibB_28058	16	Krt75
ENSMUSG00000025129	MGLibB_42322	16	Ppp1r27
ENSMUSG00000026254	MGLibB_15856	16	Eif4e2
ENSMUSG00000026321	MGLibA_55089	16	Tnfrsf11a
ENSMUSG00000028847	MGLibA_55619	16	Trappc3
ENSMUSG00000029098	MGLibA_02701	16	Acox3
ENSMUSG00000033793	MGLibA_05920	16	Atp6v1h
ENSMUSG00000036941	MGLibA_15911	16	Elac1
ENSMUSG00000039860	MGLibA_51359	16	Srrm3
ENSMUSG00000040998	MGLibB_34552	16	Npnt
ENSMUSG00000052911	MGLibA_28403	16	Lamb2
ENSMUSG00000053519	MGLibB_26954	16	Kcnip1
ENSMUSG00000055172	MGLibA_07480	16	C1ra
ENSMUSG00000055963	MGLibB_55917	16	Triqk
ENSMUSG00000059975	MGLibB_61136	16	Zfp74
ENSMUSG00000060245	MGLibB_58260	16	Vmn1r228
ENSMUSG00000070719	MGLibA_41259	16	Pla2g4d
ENSMUSG00000075208	MGLibB_35505	16	Olfr1019
ENSMUSG00000079120	MGLibA_02181	16	AY761185
ENSMUSG00000001333	MGLibA_52313	15	Sync
ENSMUSG00000003039	MGLibA_17533	15	Fam32a
ENSMUSG00000005262	MGLibB_57146	15	Ufd1l
ENSMUSG00000006517	MGLibA_32721	15	Mvd
ENSMUSG00000012282	MGLibB_59598	15	Wnt8a
ENSMUSG00000013653	MGLibA_00660	15	1810065E05Rik
ENSMUSG00000017311	MGLibB_43986	15	Pyy
ENSMUSG00000020892	MGLibB_03911	15	Aloxe3
ENSMUSG00000021379	MGLibB_25270	15	Id4
ENSMUSG00000021850	MGLibA_00282	15	1700011H14Rik
ENSMUSG00000022090	MGLibB_40233	15	Pdlim2
ENSMUSG00000022997	MGLibB_59565	15	Wnt1
ENSMUSG00000025081	MGLibB_53270	15	Tdrd1
ENSMUSG00000025991	MGLibB_11743	15	Cps1
ENSMUSG00000027611	MGLibB_42922	15	Procr
ENSMUSG00000027790	MGLibB_48550	15	Sis
ENSMUSG00000027963	MGLibA_16871	15	Extl2
ENSMUSG00000028973	MGLibA_02327	15	Abcb8
ENSMUSG00000032606	MGLibA_34006	15	Nicn1
ENSMUSG00000033938	MGLibB_33595	15	Ndufb7
ENSMUSG00000033961	MGLibB_60764	15	Zfp446
ENSMUSG00000045690	MGLibA_59414	15	Wdr89
ENSMUSG00000048281	MGLibA_14253	15	Dleu7
ENSMUSG00000049530	MGLibA_10885	15	Clrn2
ENSMUSG00000051611	MGLibB_35763	15	Olfr112
ENSMUSG00000055197	MGLibA_18246	15	Fev
ENSMUSG00000059714	MGLibB_18559	15	Flot1
ENSMUSG00000060739	MGLibB_34809	15	Nsa2
ENSMUSG00000061740	MGLibA_12829	15	Cyp2d22
ENSMUSG00000070420	MGLibA_61734	15	Zscan25
ENSMUSG00000070563	MGLibB_50688	15	Spaca4
ENSMUSG00000090000	MGLibB_25315	15	Ier3ip1
ENSMUSG00000094701	MGLibB_38607	15	Olfr916
ENSMUSG00000107235	MGLibB_57406	15	Uqcrc1
mmu-mir-7660	MGLibA_65266	15	mmu-mir-7660
mmu-mir-99a	MGLibA_63569	15	mmu-mir-99a
NonTargetingControlGuideForMouse	0531_MGLibB_62335	15	NonTargetingControlGuideForMouse
ENSMUSG00000004100	MGLibA_42090	14	Ppan
ENSMUSG00000020648	MGLibB_15045	14	Dus4l
ENSMUSG00000025630	MGLibB_24790	14	Hprt
ENSMUSG00000026956	MGLibA_56814	14	Uap1l1
ENSMUSG00000028298	MGLibA_10080	14	Cga
ENSMUSG00000028715	MGLibB_12927	14	Cyp4a14
ENSMUSG00000028744	MGLibB_42493	14	Pqlc2
ENSMUSG00000029032	MGLibA_05007	14	Arhgef16
ENSMUSG00000029452	MGLibA_54263	14	Tmem116
ENSMUSG00000031637	MGLibB_29339	14	Lrp2bp
ENSMUSG00000032796	MGLibB_28375	14	Lama1
ENSMUSG00000034664	MGLibA_26453	14	Itga2b
ENSMUSG00000034858	MGLibA_17460	14	Fam214a
ENSMUSG00000034958	MGLibA_05582	14	Atcay
ENSMUSG00000037344	MGLibB_48733	14	Slc12a9
ENSMUSG00000040680	MGLibA_27947	14	Kremen2
ENSMUSG00000041319	MGLibA_53762	14	Thoc6
ENSMUSG00000047730	MGLibA_18131	14	Fcgbp
ENSMUSG00000048251	MGLibA_06677	14	Bcl11b
ENSMUSG00000049561	MGLibA_38715	14	Olfr95
ENSMUSG00000050641	MGLibB_06347	14	BC048562
ENSMUSG00000052609	MGLibB_41435	14	Plekhg3
ENSMUSG00000055839	MGLibB_53088	14	Tceb2
ENSMUSG00000059552	MGLibA_56033	14	Trp53
ENSMUSG00000061082	MGLibA_41283	14	Plac1
ENSMUSG00000061602	MGLibB_58476	14	Vmn1r78
ENSMUSG00000063137	MGLibA_36841	14	Olfr177
ENSMUSG00000070806	MGLibB_61610	14	Zmynd12
ENSMUSG00000078753	MGLibB_47198	14	Scgb1b24
ENSMUSG00000079597	MGLibB_21628	14	Gm5483
ENSMUSG00000095620	MGLibB_00680	14	2010005H15Rik
Epb4.1l2	MGLibA_16274	14	Epb4.1l2
ENSMUSG00000002908	MGLibA_27076	13	Kcnn1
ENSMUSG00000002910	MGLibA_05288	13	Arrdc2
ENSMUSG00000003518	MGLibB_15101	13	Dusp3
ENSMUSG00000005917	MGLibB_39128	13	Otx1
ENSMUSG00000014303	MGLibB_20105	13	Glis2
ENSMUSG00000020737	MGLibA_24542	13	Hn1
ENSMUSG00000024308	MGLibA_52694	13	Tapbp
ENSMUSG00000025043	MGLibA_15085	13	Dusp21
ENSMUSG00000026220	MGLibA_48799	13	Slc16a14
ENSMUSG00000026491	MGLibB_03484	13	Ahctf1
ENSMUSG00000026849	MGLibB_55358	13	Tor1a
ENSMUSG00000028927	MGLibB_39303	13	Padi2
ENSMUSG00000029311	MGLibB_24914	13	Hsd17b11
ENSMUSG00000030424	MGLibA_61374	13	Zfp939
ENSMUSG00000030731	MGLibB_52404	13	Syt3
ENSMUSG00000030871	MGLibA_15383	13	Ears2
ENSMUSG00000031513	MGLibB_28766	13	Leprotl1
ENSMUSG00000033361	MGLibA_43135	13	Prrg3
ENSMUSG00000035270	MGLibA_25993	13	Impg2
ENSMUSG00000036550	MGLibA_11097	13	Cnot1
ENSMUSG00000038011	MGLibA_14409	13	Dnah10
ENSMUSG00000041009	MGLibB_26227	13	Iqcf4
ENSMUSG00000044147	MGLibB_04852	13	Arf6
ENSMUSG00000044768	MGLibB_13105	13	D1Ertd622e
ENSMUSG00000044921	MGLibB_44664	13	Rassf9
ENSMUSG00000045377	MGLibB_54881	13	Tmem88
ENSMUSG00000047554	MGLibA_54760	13	Tmem41b
ENSMUSG00000051329	MGLibB_35096	13	Nup160
ENSMUSG00000053054	MGLibB_03193	13	Adh6a
ENSMUSG00000059280	MGLibA_58943	13	Vpreb2
ENSMUSG00000060024	MGLibB_58213	13	Vmn1r213
ENSMUSG00000066036	MGLibA_57068	13	Ubr4
ENSMUSG00000089917	MGLibA_57136	13	Uckl1
ENSMUSG00000095365	MGLibB_44785	13	Rbm31y
Cep110	MGLibB_09852	12	Cep110
E130309F12Rik	MGLibA_15276	12	E130309F12Rik
ENSMUSG00000004221	MGLibB_25660	12	Ikbkg
ENSMUSG00000006464	MGLibA_06598	12	Bbs1
ENSMUSG00000007805	MGLibA_56688	12	Twist2
ENSMUSG00000010021	MGLibA_27350	12	Kif19a
ENSMUSG00000012428	MGLibA_51732	12	Steap4
ENSMUSG00000020911	MGLibB_27974	12	Krt19
ENSMUSG00000022075	MGLibA_45405	12	Rhobtb2
ENSMUSG00000022185	MGLibA_02624	12	Acin1
ENSMUSG00000022488	MGLibA_33401	12	Nckap1l
ENSMUSG00000025402	MGLibA_33139	12	Nab2
ENSMUSG00000025421	MGLibB_23903	12	Hdhd2
ENSMUSG00000027347	MGLibA_44617	12	Rasgrp1
ENSMUSG00000028356	MGLibA_03963	12	Ambp
ENSMUSG00000030314	MGLibB_05660	12	Atg7
ENSMUSG00000030748	MGLibA_25902	12	Il4ra
ENSMUSG00000036330	MGLibA_48855	12	Slc18a1
ENSMUSG00000041560	MGLibB_20198	12	Gltscr2
ENSMUSG00000041870	MGLibB_04217	12	Ankrd13a
ENSMUSG00000042558	MGLibA_03253	12	Adprhl2
ENSMUSG00000043719	MGLibA_11372	12	Col6a6
ENSMUSG00000047631	MGLibA_04699	12	Apof
ENSMUSG00000051985	MGLibA_25596	12	Igfn1
ENSMUSG00000054083	MGLibB_07928	12	Capn12
ENSMUSG00000054320	MGLibB_29437	12	Lrrc36
ENSMUSG00000054905	MGLibA_51743	12	Stfa3
ENSMUSG00000059964	MGLibA_35942	12	Olfr119
ENSMUSG00000066671	MGLibB_36943	12	Olfr220
ENSMUSG00000068114	MGLibB_08375	12	Ccdc134
ENSMUSG00000070044	MGLibA_17186	12	Fam149a
ENSMUSG00000074004	MGLibB_06164	12	B3gnt6
ENSMUSG00000075273	MGLibB_56404	12	Ttc30b
ENSMUSG00000094012	MGLibA_20229	12	Gm10024
ENSMUSG00000094978	MGLibA_47208	12	Scgb1b20
Gpr128	MGLibB_22559	12	Gpr128
mmu-let-7c-2	MGLibA_63394	12	mmu-let-7c-2
ENSMUSG00000000049	MGLibA_04701	11	Apoh
ENSMUSG00000001151	MGLibB_39956	11	Pcnt
ENSMUSG00000001901	MGLibA_26954	11	Kcnh6
ENSMUSG00000002107	MGLibA_09764	11	Celf2
ENSMUSG00000005983	MGLibB_00478	11	1700037C18Rik
ENSMUSG00000009621	MGLibA_57804	11	Vav2
ENSMUSG00000018761	MGLibA_31757	11	Mpdu1
ENSMUSG00000019699	MGLibA_03724	11	Akt3
ENSMUSG00000020023	MGLibB_54148	11	Tmcc3
ENSMUSG00000020723	MGLibB_07716	11	Cacng4
ENSMUSG00000021055	MGLibB_16642	11	Esr2
ENSMUSG00000021579	MGLibA_29384	11	Lrrc14b
ENSMUSG00000022211	MGLibB_29386	11	Lrrc16b
ENSMUSG00000022223	MGLibB_47480	11	Sdr39u1
ENSMUSG00000023064	MGLibA_50293	11	Sncg
ENSMUSG00000023883	MGLibB_40650	11	Phf10
ENSMUSG00000025004	MGLibB_12785	11	Cyp2c40
ENSMUSG00000025355	MGLibA_31551	11	Mmp19
ENSMUSG00000025969	MGLibB_34783	11	Nrp2
ENSMUSG00000026459	MGLibB_32999	11	Myog
ENSMUSG00000026853	MGLibB_11817	11	Crat
ENSMUSG00000027752	MGLibB_16847	11	Exosc8
ENSMUSG00000028357	MGLibB_27315	11	Kif12
ENSMUSG00000028669	MGLibB_41075	11	Pithd1
ENSMUSG00000029999	MGLibB_53586	11	Tgfa
ENSMUSG00000030243	MGLibB_45017	11	Recql
ENSMUSG00000030317	MGLibB_53913	11	Timp4
ENSMUSG00000030649	MGLibA_04087	11	Anapc15
ENSMUSG00000031325	MGLibB_01329	11	4930519F16Rik
ENSMUSG00000032744	MGLibB_24065	11	Heyl
ENSMUSG00000032867	MGLibA_18111	11	Fbxw8
ENSMUSG00000035885	MGLibB_11626	11	Cox8a
ENSMUSG00000036835	MGLibB_43310	11	Psenen
ENSMUSG00000037415	MGLibB_44453	11	Ranbp10
ENSMUSG00000037686	MGLibA_05506	11	Aspg
ENSMUSG00000038000	MGLibA_02598	11	Acd
ENSMUSG00000039244	MGLibB_15262	11	E130309D02Rik
ENSMUSG00000040943	MGLibA_53429	11	Tet2
ENSMUSG00000040972	MGLibA_25622	11	Igsf21
ENSMUSG00000041380	MGLibB_25109	11	Htr2c
ENSMUSG00000041782	MGLibA_28370	11	Lad1
ENSMUSG00000042406	MGLibA_05596	11	Atf4
ENSMUSG00000044014	MGLibA_34623	11	Npy5r
ENSMUSG00000046338	MGLibB_22412	11	Gpat2
ENSMUSG00000051223	MGLibB_07393	11	Bzw1
ENSMUSG00000052302	MGLibB_52903	11	Tbc1d30
ENSMUSG00000057606	MGLibA_11405	11	Colq
ENSMUSG00000064264	MGLibB_60742	11	Zfp428
ENSMUSG00000071517	MGLibA_20285	11	Gm10334
ENSMUSG00000071519	MGLibB_43206	11	Prss3
ENSMUSG00000072623	MGLibA_61456	11	Zfp9
ENSMUSG00000074365	MGLibA_11986	11	Crxos
ENSMUSG00000075166	MGLibA_35708	11	Olfr1104
ENSMUSG00000075512	MGLibB_20942	11	Gm1587
ENSMUSG00000087194	MGLibA_48632	11	Skint6
ENSMUSG00000090383	MGLibB_58764	11	Vmn2r58
ENSMUSG00000094133	MGLibA_36568	11	Olfr1431
ENSMUSG00000094714	MGLibB_20968	11	Gm16430
ENSMUSG00000098377	MGLibB_52652	11	Tango2
mmu-mir-6393	MGLibA_63405	11	mmu-mir-6393
mmu-mir-6962	MGLibA_63437	11	mmu-mir-6962
NonTargetingControlGuideForMouse	0358_MGLibB_62162	11	NonTargetingControlGuideForMouse
NonTargetingControlGuideForMouse	0268_MGLibB_62072	11	NonTargetingControlGuideForMouse
NonTargetingControlGuideForMouse	0895_MGLibB_62699	11	NonTargetingControlGuideForMouse
ENSMUSG00000001891	MGLibA_57193	10	Ugp2
ENSMUSG00000002968	MGLibB_30842	10	Med25
ENSMUSG00000004880	MGLibB_28518	10	Lbr
ENSMUSG00000009246	MGLibB_56065	10	Trpm5
ENSMUSG00000010760	MGLibB_40738	10	Phlda2
ENSMUSG00000018500	MGLibB_03237	10	Adora2b
ENSMUSG00000019659	MGLibA_08364	10	Ccdc12
ENSMUSG00000020124	MGLibA_57515	10	Usp15
ENSMUSG00000020475	MGLibB_40523	10	Pgam2
ENSMUSG00000023084	MGLibA_29535	10	Lrrc71
ENSMUSG00000023908	MGLibB_41165	10	Pkmyt1
ENSMUSG00000023939	MGLibB_31992	10	Mrpl14
ENSMUSG00000023959	MGLibA_10798	10	Clic5
ENSMUSG00000024431	MGLibA_34692	10	Nr3c1
ENSMUSG00000024696	MGLibA_29261	10	Lpxn
ENSMUSG00000025477	MGLibA_26072	10	Inpp5a
ENSMUSG00000026356	MGLibA_13285	10	Dars
ENSMUSG00000026478	MGLibB_28401	10	Lamc1
ENSMUSG00000027827	MGLibB_26865	10	Kcnab1
ENSMUSG00000029158	MGLibA_59913	10	Yipf7
ENSMUSG00000030222	MGLibA_45129	10	Rerg
ENSMUSG00000030382	MGLibB_49171	10	Slc27a5
ENSMUSG00000030708	MGLibB_14458	10	Dnajb13
ENSMUSG00000031153	MGLibB_23007	10	Gripap1
ENSMUSG00000031233	MGLibB_40560	10	Pgk2
ENSMUSG00000031807	MGLibB_40562	10	Pgls
ENSMUSG00000032194	MGLibB_26746	10	Kank2
ENSMUSG00000032671	MGLibB_02022	10	A930018P22Rik
ENSMUSG00000035606	MGLibB_28286	10	Ky
ENSMUSG00000037993	MGLibA_14133	10	Dhx38
ENSMUSG00000040302	MGLibB_44822	10	Rbm48
ENSMUSG00000044034	MGLibB_34490	10	Npb
ENSMUSG00000044061	MGLibA_36969	10	Olfr225
ENSMUSG00000045053	MGLibA_26932	10	Kcng3
ENSMUSG00000045822	MGLibB_61748	10	Zswim3
ENSMUSG00000045854	MGLibA_29878	10	Lyrm2
ENSMUSG00000046916	MGLibB_32793	10	Myct1
ENSMUSG00000049076	MGLibB_02563	10	Acap2
ENSMUSG00000049940	MGLibB_40607	10	Pgrmc2
ENSMUSG00000051037	MGLibB_60777	10	Zfp455
ENSMUSG00000054142	MGLibA_58308	10	Vmn1r236
ENSMUSG00000056310	MGLibA_56787	10	Tyw1
ENSMUSG00000057280	MGLibA_32702	10	Musk
ENSMUSG00000058628	MGLibA_38516	10	Olfr875
ENSMUSG00000059743	MGLibB_18182	10	Fdps
ENSMUSG00000060268	MGLibB_20996	10	Gm1661
ENSMUSG00000070943	MGLibA_37251	10	Olfr356
ENSMUSG00000072596	MGLibB_15359	10	Ear2
ENSMUSG00000074340	MGLibA_39153	10	Ovgp1
ENSMUSG00000074738	MGLibA_06217	10	B930041F14Rik
ENSMUSG00000074995	MGLibA_36904	10	Olfr201
Gm15070	MGLibB_20862	10	Gm15070
mmu-mir-6935	MGLibA_62597	10	mmu-mir-6935
ENSMUSG00000003072	MGLibB_05805	9	Atp5d
ENSMUSG00000009687	MGLibB_19122	9	Fxyd5
ENSMUSG00000024151	MGLibA_32294	9	Msh2
ENSMUSG00000024677	MGLibB_32251	9	Ms4a6b
ENSMUSG00000024729	MGLibB_00342	9	1700017D01Rik
ENSMUSG00000024913	MGLibB_29352	9	Lrp5
ENSMUSG00000026622	MGLibB_33709	9	Nek2
ENSMUSG00000026879	MGLibA_23144	9	Gsn
ENSMUSG00000027185	MGLibA_33284	9	Nat10
ENSMUSG00000028894	MGLibB_26066	9	Inpp5b
ENSMUSG00000028980	MGLibB_23634	9	H6pd
ENSMUSG00000031516	MGLibB_13475	9	Dctn6
ENSMUSG00000031766	MGLibA_48728	9	Slc12a3
ENSMUSG00000031880	MGLibB_46487	9	Rrad
ENSMUSG00000031880	MGLibA_46501	9	Rrad
ENSMUSG00000032175	MGLibA_56764	9	Tyk2
ENSMUSG00000032186	MGLibA_54947	9	Tmod2
ENSMUSG00000032278	MGLibB_39473	9	Paqr5
ENSMUSG00000033278	MGLibB_43796	9	Ptprm
ENSMUSG00000036687	MGLibA_54474	9	Tmem184a
ENSMUSG00000036916	MGLibA_60567	9	Zfp280c
ENSMUSG00000037188	MGLibB_22929	9	Grhl3
ENSMUSG00000037275	MGLibA_19757	9	Gemin5
ENSMUSG00000037321	MGLibA_52687	9	Tap1
ENSMUSG00000037349	MGLibB_35034	9	Nudt22
ENSMUSG00000037685	MGLibA_05928	9	Atp8a1
ENSMUSG00000037742	MGLibA_15523	9	Eef1a1
ENSMUSG00000038005	MGLibB_00959	9	2700029M09Rik
ENSMUSG00000039178	MGLibA_52886	9	Tbc1d19
ENSMUSG00000039774	MGLibA_19369	9	Galnt12
ENSMUSG00000043226	MGLibB_35480	9	Olfr1009
ENSMUSG00000043383	MGLibA_36345	9	Olfr1342
ENSMUSG00000043681	MGLibB_17515	9	Fam25c
ENSMUSG00000044043	MGLibA_39791	9	Pcdhb14
ENSMUSG00000045322	MGLibB_54041	9	Tlr9
ENSMUSG00000048040	MGLibA_05347	9	Arxes2
ENSMUSG00000048355	MGLibA_05344	9	Arxes1
ENSMUSG00000050232	MGLibA_12587	9	Cxcr3
ENSMUSG00000050383	MGLibA_52226	9	Svs3b
ENSMUSG00000051483	MGLibB_08222	9	Cbr1
ENSMUSG00000052056	MGLibB_60489	9	Zfp217
ENSMUSG00000052684	MGLibA_26740	9	Jun
ENSMUSG00000053253	MGLibA_33476	9	Ndfip2
ENSMUSG00000053477	MGLibB_53126	9	Tcf4
ENSMUSG00000054206	MGLibB_23446	9	Gzmm
ENSMUSG00000056679	MGLibB_22645	9	Gpr173
ENSMUSG00000059208	MGLibA_24604	9	Hnrnpm
ENSMUSG00000062121	MGLibA_36716	9	Olfr149
ENSMUSG00000062646	MGLibA_19441	9	Ganc
ENSMUSG00000068921	MGLibB_13256	9	Dap3
ENSMUSG00000069633	MGLibB_40420	9	Pex11g
ENSMUSG00000070383	MGLibA_37316	9	Olfr389
ENSMUSG00000074123	MGLibB_01749	9	7420426K07Rik
ENSMUSG00000075101	MGLibB_36002	9	Olfr1222
ENSMUSG00000079105	MGLibA_07574	9	C7
ENSMUSG00000095075	MGLibA_38302	9	Olfr782
ENSMUSG00000096145	MGLibA_57914	9	Vkorc1
Gm14446	MGLibB_20763	9	Gm14446
Ifltd1	MGLibB_25402	9	Ifltd1
mmu-mir-30e	MGLibA_64827	9	mmu-mir-30e
NonTargetingControlGuideForMouse	0118_MGLibA_66523	9	NonTargetingControlGuideForMouse
4930428D18Rik	MGLibA_01228	8	4930428D18Rik
4933411K20Rik	MGLibA_01557	8	4933411K20Rik
ENSMUSG00000000385	MGLibB_54978	8	Tmprss2
ENSMUSG00000000759	MGLibB_56605	8	Tubgcp3
ENSMUSG00000001053	MGLibA_33085	8	N4bp3
ENSMUSG00000009035	MGLibA_54478	8	Tmem184b
ENSMUSG00000011034	MGLibA_49607	8	Slc5a1
ENSMUSG00000011752	MGLibA_40533	8	Pgam1
ENSMUSG00000012126	MGLibA_57093	8	Ubxn11
ENSMUSG00000015342	MGLibA_59732	8	Xk
ENSMUSG00000016409	MGLibA_34094	8	Nkap
ENSMUSG00000019338	MGLibA_61079	8	Zfp687
ENSMUSG00000020405	MGLibB_16973	8	Fabp6
ENSMUSG00000021779	MGLibA_53782	8	Thrb
ENSMUSG00000023272	MGLibB_11881	8	Creld2
ENSMUSG00000024127	MGLibA_42646	8	Prepl
ENSMUSG00000026198	MGLibA_02321	8	Abcb6
ENSMUSG00000026275	MGLibA_42378	8	Ppp1r7
ENSMUSG00000027018	MGLibA_23728	8	Hat1
ENSMUSG00000027187	MGLibB_08175	8	Cat
ENSMUSG00000028064	MGLibA_47677	8	Sema4a
ENSMUSG00000029423	MGLibA_41120	8	Piwil1
ENSMUSG00000031157	MGLibB_42487	8	Pqbp1
ENSMUSG00000031295	MGLibA_40735	8	Phka2
ENSMUSG00000031644	MGLibB_33707	8	Nek1
ENSMUSG00000031731	MGLibB_04487	8	Ap1g1
ENSMUSG00000032633	MGLibB_18538	8	Flcn
ENSMUSG00000033809	MGLibA_03840	8	Alg3
ENSMUSG00000034088	MGLibA_23917	8	Hdlbp
ENSMUSG00000034329	MGLibA_07205	8	Brip1
ENSMUSG00000035900	MGLibB_22885	8	Gramd4
ENSMUSG00000036199	MGLibB_33516	8	Ndufa13
ENSMUSG00000038437	MGLibB_31465	8	Mllt6
ENSMUSG00000040034	MGLibB_35120	8	Nup43
ENSMUSG00000040147	MGLibB_30191	8	Maob
ENSMUSG00000040297	MGLibA_52007	8	Suco
ENSMUSG00000040478	MGLibA_42580	8	Prdm13
ENSMUSG00000041225	MGLibA_04895	8	Arhgap12
ENSMUSG00000042179	MGLibB_41673	8	Pnliprp1
ENSMUSG00000042203	MGLibB_52886	8	Tbc1d22b
ENSMUSG00000044375	MGLibB_06294	8	BC027072
ENSMUSG00000046814	MGLibA_19630	8	Gchfr
ENSMUSG00000048337	MGLibB_34608	8	Npy4r
ENSMUSG00000050199	MGLibB_28837	8	Lgr4
ENSMUSG00000050714	MGLibA_60056	8	Zbtb26
ENSMUSG00000051113	MGLibB_17638	8	Fam71e1
ENSMUSG00000051457	MGLibB_51037	8	Spn
ENSMUSG00000051851	MGLibB_12602	8	Cxx1c
ENSMUSG00000053129	MGLibA_23224	8	Gsx1
ENSMUSG00000054003	MGLibA_53301	8	Tdrd9
ENSMUSG00000054498	MGLibB_37114	8	Olfr308
ENSMUSG00000057723	MGLibA_28025	8	Krt33b
ENSMUSG00000059119	MGLibA_33243	8	Nap1l4
ENSMUSG00000062960	MGLibA_27269	8	Kdr
ENSMUSG00000063232	MGLibA_47797	8	Serpina11
ENSMUSG00000063439	MGLibA_06224	8	B9d2
ENSMUSG00000067219	MGLibB_34036	8	Nipal1
ENSMUSG00000068815	MGLibB_35802	8	Olfr1143
ENSMUSG00000073599	MGLibA_15456	8	Ecscr
ENSMUSG00000073755	MGLibB_01660	8	5730409E04Rik
ENSMUSG00000074909	MGLibB_44473	8	Ranbp6
ENSMUSG00000079262	MGLibB_49795	8	Slco1a6
ENSMUSG00000091076	MGLibA_58604	8	Vmn2r115
ENSMUSG00000095654	MGLibB_41565	8	Plscr5
ENSMUSG00000096001	MGLibA_00953	8	2610528A11Rik
ENSMUSG00000096468	MGLibB_20965	8	Gm16405
ENSMUSG00000096630	MGLibB_58660	8	Vmn2r26
ENSMUSG00000099048	MGLibA_62724	8	mmu-mir-665
ENSMUSG00000102748	MGLibA_39884	8	Pcdhgb2
mmu-mir-7659	MGLibA_62124	8	mmu-mir-7659
NonTargetingControlGuideForMouse	0384_MGLibB_62188	8	NonTargetingControlGuideForMouse
Olfr257	MGLibB_37003	8	Olfr257
Ear12	MGLibB_15350	7	Ear12
ENSMUSG00000002416	MGLibA_33589	7	Ndufb2
ENSMUSG00000004609	MGLibB_09143	7	Cd33
ENSMUSG00000005410	MGLibB_30653	7	Mcm5
ENSMUSG00000007029	MGLibA_57779	7	Vars
ENSMUSG00000016498	MGLibB_40040	7	Pdcd1lg2
ENSMUSG00000017943	MGLibB_19671	7	Gdap1l1
ENSMUSG00000019883	MGLibA_15429	7	Echdc1
ENSMUSG00000022489	MGLibA_40106	7	Pde1b
ENSMUSG00000022704	MGLibB_44039	7	Qtrtd1
ENSMUSG00000022945	MGLibB_10115	7	Chaf1b
ENSMUSG00000023886	MGLibA_50151	7	Smoc2
ENSMUSG00000024188	MGLibB_29736	7	Luc7l
ENSMUSG00000024754	MGLibB_54704	7	Tmem2
ENSMUSG00000026971	MGLibA_26525	7	Itgb6
ENSMUSG00000027304	MGLibA_46666	7	Rtf1
ENSMUSG00000027544	MGLibB_33848	7	Nfatc2
ENSMUSG00000027957	MGLibA_49304	7	Slc35a3
ENSMUSG00000029420	MGLibA_45582	7	Rimbp2
ENSMUSG00000030064	MGLibA_18928	7	Frmd4b
ENSMUSG00000031994	MGLibA_03071	7	Adamts8
ENSMUSG00000035936	MGLibA_03790	7	Aldh5a1
ENSMUSG00000036587	MGLibA_19095	7	Fut7
ENSMUSG00000036777	MGLibB_04365	7	Anln
ENSMUSG00000037246	MGLibA_23528	7	H2-M10.5
ENSMUSG00000037344	MGLibB_48731	7	Slc12a9
ENSMUSG00000037997	MGLibA_39537	7	Parp11
ENSMUSG00000038524	MGLibA_18154	7	Fchsd1
ENSMUSG00000039032	MGLibB_56161	7	Tsga13
ENSMUSG00000040957	MGLibA_07622	7	Cables1
ENSMUSG00000041225	MGLibA_04893	7	Arhgap12
ENSMUSG00000041515	MGLibB_26315	7	Irf8
ENSMUSG00000041609	MGLibA_08608	7	Ccdc64
ENSMUSG00000042500	MGLibA_03421	7	Ago4
ENSMUSG00000043298	MGLibA_50049	7	Smco3
ENSMUSG00000044041	MGLibA_27964	7	Krt13
ENSMUSG00000046095	MGLibA_28018	7	Krt32
ENSMUSG00000048155	MGLibB_23618	7	H2bfm
ENSMUSG00000048458	MGLibB_17444	7	Fam212b
ENSMUSG00000050190	MGLibA_21601	7	Gm5346
ENSMUSG00000054052	MGLibA_44996	7	Rdh19
ENSMUSG00000055799	MGLibA_53146	7	Tcf7l1
ENSMUSG00000057058	MGLibB_48584	7	Skap1
ENSMUSG00000059382	MGLibA_52777	7	Tas2r120
ENSMUSG00000059473	MGLibB_38753	7	Olfr979
ENSMUSG00000063820	MGLibA_05183	7	Arl9
ENSMUSG00000064063	MGLibA_06339	7	BC048507
ENSMUSG00000066877	MGLibB_33387	7	Nck2
ENSMUSG00000073962	MGLibB_37769	7	Olfr576
ENSMUSG00000074141	MGLibB_25890	7	Il4i1
ENSMUSG00000074211	MGLibB_47445	7	Sdhaf1
ENSMUSG00000074923	MGLibA_39378	7	Pak6
ENSMUSG00000075182	MGLibA_35633	7	Olfr1065
ENSMUSG00000075380	MGLibB_37237	7	Olfr355
ENSMUSG00000078671	MGLibB_10155	7	Chd2
ENSMUSG00000079278	MGLibB_54604	7	Tmem233
ENSMUSG00000081402	MGLibB_20923	7	Gm15455
ENSMUSG00000096010	MGLibB_24400	7	Hist4h4
ENSMUSG00000096826	MGLibB_08781	7	Ccl27b
Klra19	MGLibA_27780	7	Klra19
mmu-mir-181a-2	MGLibA_64346	7	mmu-mir-181a-2
mmu-mir-30f	MGLibA_64831	7	mmu-mir-30f
mmu-mir-369	MGLibA_62921	7	mmu-mir-369
mmu-mir-6378	MGLibA_64574	7	mmu-mir-6378
mmu-mir-7061	MGLibA_65589	7	mmu-mir-7061
NonTargetingControlGuideForMouse	0268_MGLibA_66673	7	NonTargetingControlGuideForMouse
NonTargetingControlGuideForMouse	0285_MGLibA_66690	7	NonTargetingControlGuideForMouse
NonTargetingControlGuideForMouse	0895_MGLibA_67300	7	NonTargetingControlGuideForMouse
NonTargetingControlGuideForMouse	0358_MGLibA_66763	7	NonTargetingControlGuideForMouse
0610010B08Rik	MGLibB_00014	6	0610010B08Rik
2700050L05Rik	MGLibA_00965	6	2700050L05Rik
ENSMUSG00000000168	MGLibA_14240	6	Dlat
ENSMUSG00000003316	MGLibA_20084	6	Glg1
ENSMUSG00000011148	MGLibA_03300	6	Adssl1
ENSMUSG00000015647	MGLibA_28398	6	Lama5
ENSMUSG00000016493	MGLibA_09179	6	Cd46
ENSMUSG00000019429	MGLibB_18260	6	Ffar3
ENSMUSG00000020089	MGLibA_42084	6	Ppa1
ENSMUSG00000021096	MGLibA_42219	6	Ppm1a
ENSMUSG00000022711	MGLibA_41652	6	Pmm2
ENSMUSG00000024338	MGLibA_43422	6	Psmb8
ENSMUSG00000024694	MGLibA_27277	6	Keg1
ENSMUSG00000025069	MGLibA_23201	6	Gsto2
ENSMUSG00000025809	MGLibB_26496	6	Itgb1
ENSMUSG00000025809	MGLibA_26505	6	Itgb1
ENSMUSG00000027419	MGLibB_39992	6	Pcsk2
ENSMUSG00000027470	MGLibB_32897	6	Mylk2
ENSMUSG00000027952	MGLibA_41671	6	Pmvk
ENSMUSG00000028874	MGLibA_18402	6	Fgr
ENSMUSG00000029263	MGLibB_40868	6	Pigg
ENSMUSG00000029314	MGLibA_03441	6	Agpat9
ENSMUSG00000029778	MGLibB_03163	6	Adcyap1r1
ENSMUSG00000030008	MGLibA_42511	6	Pradc1
ENSMUSG00000031162	MGLibA_19508	6	Gata1
ENSMUSG00000031765	MGLibA_32381	6	Mt1
ENSMUSG00000032083	MGLibA_04651	6	Apoa1
ENSMUSG00000032114	MGLibB_49386	6	Slc37a4
ENSMUSG00000032737	MGLibA_26093	6	Inppl1
ENSMUSG00000033579	MGLibA_16954	6	Fa2h
ENSMUSG00000036158	MGLibA_42673	6	Prickle1
ENSMUSG00000036185	MGLibB_46993	6	Sapcd1
ENSMUSG00000037787	MGLibA_04755	6	Apopt1
ENSMUSG00000039148	MGLibB_47019	6	Sart1
ENSMUSG00000039533	MGLibB_31498	6	Mmd2
ENSMUSG00000039697	MGLibA_33444	6	Ncoa7
ENSMUSG00000040274	MGLibB_09566	6	Cdk6
ENSMUSG00000041598	MGLibA_09355	6	Cdc42ep4
ENSMUSG00000042248	MGLibA_12780	6	Cyp2c37
ENSMUSG00000043331	MGLibA_38753	6	Olfr975
ENSMUSG00000043461	MGLibB_51206	6	Sptssb
ENSMUSG00000045013	MGLibB_38127	6	Olfr711
ENSMUSG00000047094	MGLibA_35401	6	Ofcc1
ENSMUSG00000048154	MGLibA_27881	6	Kmt2d
ENSMUSG00000048874	MGLibA_40708	6	Phf3
ENSMUSG00000049372	MGLibA_35906	6	Olfr1183
ENSMUSG00000050493	MGLibB_17251	6	Fam167b
ENSMUSG00000051314	MGLibA_18263	6	Ffar2
ENSMUSG00000051457	MGLibB_51039	6	Spn
ENSMUSG00000052906	MGLibA_57114	6	Ubxn8
ENSMUSG00000053182	MGLibA_21788	6	Gm609
ENSMUSG00000053317	MGLibB_47573	6	Sec61b
ENSMUSG00000056671	MGLibA_42642	6	Prelid2
ENSMUSG00000058270	MGLibA_37018	6	Olfr25
ENSMUSG00000059842	MGLibB_60616	6	Zfp341
ENSMUSG00000060303	MGLibB_36599	6	Olfr1447
ENSMUSG00000061769	MGLibB_27800	6	Klra6
ENSMUSG00000062037	MGLibB_37057	6	Olfr285
ENSMUSG00000064181	MGLibB_44202	6	Rab3ip
ENSMUSG00000064280	MGLibB_08401	6	Ccdc146
ENSMUSG00000070632	MGLibB_07305	6	Btbd8
ENSMUSG00000072680	MGLibA_54682	6	Tmem254c
ENSMUSG00000074183	MGLibB_23151	6	Gsta1
ENSMUSG00000078880	MGLibB_20711	6	Gm14308
ENSMUSG00000078881	MGLibB_20756	6	Gm14434
ENSMUSG00000078897	MGLibB_21433	6	Gm4724
ENSMUSG00000090083	MGLibB_45981	6	Rnf8
ENSMUSG00000092043	MGLibB_16624	6	Esp6
ENSMUSG00000095061	MGLibB_15247	6	E030018B13Rik
ENSMUSG00000096472	MGLibB_09618	6	Cdkn2d
ENSMUSG00000096951	MGLibA_40267	6	Pdpn
ENSMUSG00000098375	MGLibA_32166	6	Mrps23
ENSMUSG00000099820	MGLibA_35562	6	Olfr1036
mmu-mir-137	MGLibA_64659	6	mmu-mir-137
mmu-mir-879	MGLibA_64938	6	mmu-mir-879
mmu-mir-96	MGLibA_65170	6	mmu-mir-96
NonTargetingControlGuideForMouse	0845_MGLibB_62649	6	NonTargetingControlGuideForMouse
NonTargetingControlGuideForMouse	0319_MGLibB_62123	6	NonTargetingControlGuideForMouse
Olfr176	MGLibA_36838	6	Olfr176
ENSMUSG00000000538	MGLibA_55301	5	Tom1l2
ENSMUSG00000000606	MGLibB_58861	5	Vmn2r88
ENSMUSG00000001025	MGLibA_46844	5	S100a6
ENSMUSG00000002812	MGLibB_18548	5	Flii
ENSMUSG00000003868	MGLibA_46761	5	Ruvbl2
ENSMUSG00000011832	MGLibA_16761	5	Evi5l
ENSMUSG00000013822	MGLibB_15987	5	Elof1
ENSMUSG00000017176	MGLibA_34886	5	Nt5c3b
ENSMUSG00000018076	MGLibB_30801	5	Med13l
ENSMUSG00000018574	MGLibA_02553	5	Acadvl
ENSMUSG00000019893	MGLibA_46078	5	Ros1
ENSMUSG00000020064	MGLibA_24021	5	Herc4
ENSMUSG00000020629	MGLibB_03202	5	Adi1
ENSMUSG00000020651	MGLibB_49144	5	Slc26a4
ENSMUSG00000022365	MGLibB_13945	5	Derl1
ENSMUSG00000022579	MGLibA_22500	5	Gpihbp1
ENSMUSG00000023031	MGLibB_09750	5	Cela1
ENSMUSG00000023039	MGLibA_28083	5	Krt7
ENSMUSG00000023882	MGLibB_60872	5	Zfp54
ENSMUSG00000024421	MGLibA_28392	5	Lama3
ENSMUSG00000024663	MGLibA_44214	5	Rab3il1
ENSMUSG00000025047	MGLibB_40038	5	Pdcd11
ENSMUSG00000028161	MGLibB_42426	5	Ppp3ca
ENSMUSG00000028415	MGLibB_50990	5	Spink4
ENSMUSG00000028845	MGLibB_53340	5	Tekt2
ENSMUSG00000029716	MGLibB_53577	5	Tfr2
ENSMUSG00000030019	MGLibB_17887	5	Fbxl14
ENSMUSG00000031166	MGLibA_59247	5	Wdr13
ENSMUSG00000032297	MGLibB_09774	5	Celf6
ENSMUSG00000032714	MGLibA_52280	5	Syde1
ENSMUSG00000033981	MGLibB_22939	5	Gria2
ENSMUSG00000034175	MGLibB_45355	5	Rhbdd3
ENSMUSG00000034781	MGLibA_22164	5	Gna11
ENSMUSG00000034994	MGLibB_15539	5	Eef2
ENSMUSG00000037624	MGLibA_27042	5	Kcnk2
ENSMUSG00000038048	MGLibB_11200	5	Cntnap5c
ENSMUSG00000038718	MGLibB_39653	5	Pbx3
ENSMUSG00000039405	MGLibA_43177	5	Prss23
ENSMUSG00000039476	MGLibB_43143	5	Prrx2
ENSMUSG00000041679	MGLibB_29424	5	Lrrc29
ENSMUSG00000041734	MGLibB_27453	5	Kirrel
ENSMUSG00000042097	MGLibB_60505	5	Zfp239
ENSMUSG00000042817	MGLibA_18586	5	Flt3
ENSMUSG00000051159	MGLibA_10502	5	Cited1
ENSMUSG00000052533	MGLibB_35099	5	Nup188
ENSMUSG00000056749	MGLibA_33887	5	Nfil3
ENSMUSG00000059303	MGLibA_38441	5	Olfr836
ENSMUSG00000059305	MGLibB_58919	5	Vpreb1
ENSMUSG00000059552	MGLibA_56034	5	Trp53
ENSMUSG00000062995	MGLibB_25231	5	Ica1
ENSMUSG00000064063	MGLibB_06339	5	BC048507
ENSMUSG00000067006	MGLibA_47899	5	Serpinb5
ENSMUSG00000068922	MGLibB_32360	5	Msto1
ENSMUSG00000070311	MGLibB_38548	5	Olfr894
ENSMUSG00000070686	MGLibA_07578	5	C87414
ENSMUSG00000072676	MGLibA_54676	5	Tmem254a
ENSMUSG00000075093	MGLibB_36024	5	Olfr1231
ENSMUSG00000075094	MGLibA_36032	5	Olfr1230
ENSMUSG00000078812	MGLibB_15892	5	Eif5a
ENSMUSG00000078994	MGLibB_60745	5	Zfp429
ENSMUSG00000079346	MGLibA_00308	5	1700013D24Rik
ENSMUSG00000091541	MGLibB_58532	5	Vmn1r9
ENSMUSG00000095527	MGLibA_38544	5	Olfr888
ENSMUSG00000095662	MGLibA_20800	5	Gm14482
ENSMUSG00000096146	MGLibA_26979	5	Kcnj11
Gm17252	MGLibA_21014	5	Gm17252
mmu-mir-1971	MGLibA_63222	5	mmu-mir-1971
mmu-mir-5128	MGLibA_64343	5	mmu-mir-5128
mmu-mir-6965	MGLibA_63620	5	mmu-mir-6965
NonTargetingControlGuideForMouse	0988_MGLibA_67393	5	NonTargetingControlGuideForMouse
NonTargetingControlGuideForMouse	0034_MGLibB_61838	5	NonTargetingControlGuideForMouse
NonTargetingControlGuideForMouse	0498_MGLibA_66903	5	NonTargetingControlGuideForMouse
NonTargetingControlGuideForMouse	0087_MGLibA_66492	5	NonTargetingControlGuideForMouse
NonTargetingControlGuideForMouse	0087_MGLibB_61891	5	NonTargetingControlGuideForMouse
ENSMUSG00000001440	MGLibA_27926	4	Kpnb1
ENSMUSG00000002342	MGLibB_54378	4	Tmem161a
ENSMUSG00000003778	MGLibB_07168	4	Brd8
ENSMUSG00000004187	MGLibB_27428	4	Kifc2
ENSMUSG00000006784	MGLibB_56382	4	Ttc25
ENSMUSG00000008668	MGLibA_46374	4	Rps18
ENSMUSG00000011958	MGLibB_07036	4	Bnip2
ENSMUSG00000014771	MGLibA_40061	4	Pdcd2
ENSMUSG00000018537	MGLibA_39924	4	Pcgf2
ENSMUSG00000020689	MGLibA_26517	4	Itgb3
ENSMUSG00000020898	MGLibA_12267	4	Ctc1
ENSMUSG00000021171	MGLibB_16667	4	Esyt2
ENSMUSG00000021260	MGLibA_24111	4	Hhipl1
ENSMUSG00000021840	MGLibB_30340	4	Mapk1ip1l
ENSMUSG00000025981	MGLibB_11500	4	Coq10b
ENSMUSG00000026278	MGLibA_07057	4	Bok
ENSMUSG00000026618	MGLibA_25219	4	Iars2
ENSMUSG00000026698	MGLibA_40875	4	Pigc
ENSMUSG00000026748	MGLibB_41577	4	Plxdc2
ENSMUSG00000027401	MGLibB_53633	4	Tgm3
ENSMUSG00000028849	MGLibA_30320	4	Map7d1
ENSMUSG00000029126	MGLibA_34836	4	Nsg1
ENSMUSG00000029458	MGLibB_07139	4	Brap
ENSMUSG00000030842	MGLibB_28421	4	Lamtor1
ENSMUSG00000030972	MGLibB_02775	4	Acsm5
ENSMUSG00000032034	MGLibA_27008	4	Kcnj5
ENSMUSG00000033182	MGLibB_26817	4	Kbtbd12
ENSMUSG00000034330	MGLibA_41351	4	Plcg2
ENSMUSG00000034850	MGLibA_54298	4	Tmem127
ENSMUSG00000035790	MGLibB_09882	4	Cep19
ENSMUSG00000036570	MGLibA_19119	4	Fxyd1
ENSMUSG00000037130	MGLibA_23532	4	H2-M10.6
ENSMUSG00000037661	MGLibA_22636	4	Gpr160
ENSMUSG00000037747	MGLibA_40798	4	Phyhipl
ENSMUSG00000038151	MGLibA_42594	4	Prdm1
ENSMUSG00000038619	MGLibA_16220	4	Ensa
ENSMUSG00000039269	MGLibB_00747	4	2300002M23Rik
ENSMUSG00000041020	MGLibA_30322	4	Map7d2
ENSMUSG00000041075	MGLibB_19164	4	Fzd7
ENSMUSG00000041075	MGLibB_19166	4	Fzd7
ENSMUSG00000042379	MGLibB_16578	4	Esm1
ENSMUSG00000046329	MGLibA_49045	4	Slc25a23
ENSMUSG00000046971	MGLibA_41264	4	Pla2g4f
ENSMUSG00000049287	MGLibA_25226	4	Iba57
ENSMUSG00000051451	MGLibA_11869	4	Crebzf
ENSMUSG00000053774	MGLibA_57111	4	Ubxn7
ENSMUSG00000053930	MGLibB_48388	4	Shisa6
ENSMUSG00000054146	MGLibA_27971	4	Krt15
ENSMUSG00000054263	MGLibA_28912	4	Lifr
ENSMUSG00000055033	MGLibB_37379	4	Olfr420
ENSMUSG00000055553	MGLibB_28281	4	Kxd1
ENSMUSG00000055820	MGLibB_38720	4	Olfr967
ENSMUSG00000059112	MGLibA_36127	4	Olfr1263
ENSMUSG00000059280	MGLibB_58922	4	Vpreb2
ENSMUSG00000066643	MGLibA_59292	4	Wdr35
ENSMUSG00000067338	MGLibA_56574	4	Tuba3b
ENSMUSG00000070810	MGLibA_52064	4	Sult2a6
ENSMUSG00000071636	MGLibB_45572	4	Rimbp3
ENSMUSG00000074402	MGLibB_58400	4	Vmn1r55
ENSMUSG00000075031	MGLibA_24267	4	Hist1h2bb
ENSMUSG00000075254	MGLibA_23967	4	Heg1
ENSMUSG00000075588	MGLibB_24684	4	Hoxb2
ENSMUSG00000087598	MGLibB_60393	4	Zfp111
ENSMUSG00000091183	MGLibA_21571	4	Gm5141
ENSMUSG00000095741	MGLibA_45479	4	Rhox2f
ENSMUSG00000095864	MGLibA_58494	4	Vmn1r77
ENSMUSG00000096039	MGLibB_13177	4	D830030K20Rik
ENSMUSG00000096794	MGLibA_38585	4	Olfr905
ENSMUSG00000096834	MGLibA_20898	4	Gm15127
ENSMUSG00000106966	MGLibA_43871	4	Pum1
Leprel4	MGLibA_28772	4	Leprel4
mmu-mir-1247	MGLibA_62932	4	mmu-mir-1247
mmu-mir-5103	MGLibA_61855	4	mmu-mir-5103
mmu-mir-5114	MGLibA_63984	4	mmu-mir-5114
mmu-mir-6919	MGLibA_62327	4	mmu-mir-6919
mmu-mir-6922	MGLibA_62355	4	mmu-mir-6922
mmu-mir-7049	MGLibA_65403	4	mmu-mir-7049
mmu-mir-7051	MGLibA_65424	4	mmu-mir-7051
NonTargetingControlGuideForMouse	0988_MGLibB_62792	4	NonTargetingControlGuideForMouse
NonTargetingControlGuideForMouse	0845_MGLibA_67250	4	NonTargetingControlGuideForMouse
NonTargetingControlGuideForMouse	0884_MGLibB_62688	4	NonTargetingControlGuideForMouse
Nup62-il4i1	MGLibB_35128	4	Nup62-il4i1
Tnfsf12Tnfsf13	MGLibA_55152	4	Tnfsf12Tnfsf13
2010002M12Rik	MGLibA_00674	3	2010002M12Rik
Ear3	MGLibB_15362	3	Ear3
ENSMUSG00000003269	MGLibB_13042	3	Cyth2
ENSMUSG00000003623	MGLibA_11961	3	Crot
ENSMUSG00000006014	MGLibB_42656	3	Prg4
ENSMUSG00000009079	MGLibB_16770	3	Ewsr1
ENSMUSG00000009569	MGLibB_31397	3	Mkl2
ENSMUSG00000013833	MGLibA_30822	3	Med16
ENSMUSG00000014602	MGLibA_27354	3	Kif1a
ENSMUSG00000019368	MGLibB_47516	3	Sec14l4
ENSMUSG00000020134	MGLibA_40370	3	Peli1
ENSMUSG00000020892	MGLibB_03909	3	Aloxe3
ENSMUSG00000021186	MGLibA_17860	3	Fbln5
ENSMUSG00000021732	MGLibA_18297	3	Fgf10
ENSMUSG00000021922	MGLibB_26537	3	Itih4
ENSMUSG00000021983	MGLibA_05932	3	Atp8a2
ENSMUSG00000022235	MGLibB_10941	3	Cmbl
ENSMUSG00000022261	MGLibA_47428	3	Sdc2
ENSMUSG00000022427	MGLibA_55315	3	Tomm22
ENSMUSG00000023980	MGLibA_52627	3	Taf8
ENSMUSG00000024608	MGLibA_46360	3	Rps14
ENSMUSG00000025034	MGLibA_55903	3	Trim8
ENSMUSG00000025212	MGLibB_48134	3	Sfxn3
ENSMUSG00000026989	MGLibB_13267	3	Dapl1
ENSMUSG00000027800	MGLibB_54065	3	Tm4sf1
ENSMUSG00000027849	MGLibB_52411	3	Syt6
ENSMUSG00000028546	MGLibA_15930	3	Elavl4
ENSMUSG00000028776	MGLibB_53916	3	Tinagl1
ENSMUSG00000028988	MGLibA_12335	3	Ctnnbip1
ENSMUSG00000029254	MGLibA_51652	3	Stap1
ENSMUSG00000029550	MGLibA_51095	3	Sppl3
ENSMUSG00000030732	MGLibA_10305	3	Chrdl2
ENSMUSG00000031876	MGLibB_10978	3	Cmtm1
ENSMUSG00000032207	MGLibA_29011	3	Lipc
ENSMUSG00000033740	MGLibA_51544	3	St18
ENSMUSG00000033952	MGLibB_05518	3	Aspm
ENSMUSG00000034462	MGLibA_41150	3	Pkd2
ENSMUSG00000034926	MGLibA_14042	3	Dhcr24
ENSMUSG00000035559	MGLibA_31838	3	Mpv17l2
ENSMUSG00000035946	MGLibB_23220	3	Gsx2
ENSMUSG00000036158	MGLibB_42662	3	Prickle1
ENSMUSG00000036655	MGLibB_11394	3	Colec11
ENSMUSG00000036749	MGLibA_42545	3	Pramel5
ENSMUSG00000037465	MGLibA_27490	3	Klf10
ENSMUSG00000037466	MGLibA_01225	3	4930427A07Rik
ENSMUSG00000038009	MGLibA_14534	3	Dnajc22
ENSMUSG00000038150	MGLibA_38980	3	Ormdl3
ENSMUSG00000039205	MGLibB_10513	3	Ciz1
ENSMUSG00000039714	MGLibB_11691	3	Cplx3
ENSMUSG00000040471	MGLibB_19859	3	Ggt6
ENSMUSG00000043079	MGLibB_52353	3	Synpo
ENSMUSG00000044025	MGLibA_38321	3	Olfr790
ENSMUSG00000044469	MGLibB_55056	3	Tnfaip8l1
ENSMUSG00000044857	MGLibB_28734	3	Lemd2
ENSMUSG00000045835	MGLibB_23888	3	Hdgfl1
ENSMUSG00000046793	MGLibA_22748	3	Gpr61
ENSMUSG00000047654	MGLibB_56314	3	Tssk6
ENSMUSG00000047832	MGLibA_09390	3	Cdca4
ENSMUSG00000051627	MGLibA_24219	3	Hist1h1e
ENSMUSG00000051940	MGLibA_01625	3	5031410I06Rik
ENSMUSG00000052417	MGLibB_38146	3	Olfr720
ENSMUSG00000053217	MGLibA_52812	3	Tas2r136
ENSMUSG00000053846	MGLibA_29020	3	Lipg
ENSMUSG00000056055	MGLibB_46902	3	Sag
ENSMUSG00000056457	MGLibB_42797	3	Prl2c3
ENSMUSG00000058200	MGLibB_38012	3	Olfr66
ENSMUSG00000058385	MGLibB_24270	3	Hist1h2bg
ENSMUSG00000058385	MGLibA_24277	3	Hist1h2bg
ENSMUSG00000063801	MGLibB_04541	3	Ap3s2
ENSMUSG00000064308	MGLibA_00887	3	2410137M14Rik
ENSMUSG00000066704	MGLibA_12768	3	Cyp2b19
ENSMUSG00000067700	MGLibB_21718	3	Gm5862
ENSMUSG00000068697	MGLibA_33023	3	Myoz1
ENSMUSG00000068893	MGLibB_51104	3	Sprr2a2
ENSMUSG00000069255	MGLibB_15082	3	Dusp22
ENSMUSG00000070547	MGLibB_31900	3	Mrgprb1
ENSMUSG00000072739	MGLibB_20296	3	Gm10408
ENSMUSG00000073877	MGLibB_20654	3	Gm13306
ENSMUSG00000073950	MGLibB_37823	3	Olfr599
ENSMUSG00000074283	MGLibB_60387	3	Zfp109
ENSMUSG00000074623	MGLibB_21977	3	Gm826
ENSMUSG00000074881	MGLibA_30055	3	Mageb3
ENSMUSG00000075190	MGLibB_35601	3	Olfr1054
ENSMUSG00000075334	MGLibA_46344	3	Rprm
ENSMUSG00000078131	MGLibA_28112	3	Krtap1-3
ENSMUSG00000078664	MGLibB_51101	3	Sprr2a1
ENSMUSG00000078786	MGLibA_06287	3	BC024978
ENSMUSG00000079168	MGLibB_09070	3	Cd209g
ENSMUSG00000079627	MGLibA_45485	3	Rhox2h
ENSMUSG00000083649	MGLibA_44646	3	Rasl2-9
ENSMUSG00000086022	MGLibA_44353	3	Rad51ap2
ENSMUSG00000091003	MGLibA_21919	3	Gm7244
ENSMUSG00000094426	MGLibB_37511	3	Olfr478
ENSMUSG00000095413	MGLibA_20806	3	Gm14484
ENSMUSG00000096099	MGLibA_58257	3	Vmn1r220
LOC100038947	MGLibA_28322	3	LOC100038947
mmu-mir-6967	MGLibA_63677	3	mmu-mir-6967
mmu-mir-7a-2	MGLibA_65537	3	mmu-mir-7a-2
NonTargetingControlGuideForMouse	0498_MGLibB_62302	3	NonTargetingControlGuideForMouse
NonTargetingControlGuideForMouse	0488_MGLibA_66893	3	NonTargetingControlGuideForMouse
NonTargetingControlGuideForMouse	0513_MGLibA_66918	3	NonTargetingControlGuideForMouse
NonTargetingControlGuideForMouse	0118_MGLibB_61922	3	NonTargetingControlGuideForMouse
Prl2c4	MGLibB_42800	3	Prl2c4
D19Bwg1357e	MGLibA_13103	2	D19Bwg1357e
ENSMUSG00000000142	MGLibB_06071	2	Axin2
ENSMUSG00000002346	MGLibB_49093	2	Slc25a42
ENSMUSG00000003812	MGLibA_14603	2	Dnase2a
ENSMUSG00000005609	MGLibB_12353	2	Ctr9
ENSMUSG00000005718	MGLibA_53537	2	Tfap4
ENSMUSG00000012519	MGLibA_31457	2	Mlkl
ENSMUSG00000020180	MGLibB_50344	2	Snrpd3
ENSMUSG00000020323	MGLibB_43255	2	Prss57
ENSMUSG00000021676	MGLibA_26257	2	Iqgap2
ENSMUSG00000021936	MGLibA_30380	2	Mapk8
ENSMUSG00000021945	MGLibB_61591	2	Zmym2
ENSMUSG00000022338	MGLibA_16252	2	Eny2
ENSMUSG00000022553	MGLibA_29999	2	Maf1
ENSMUSG00000022893	MGLibB_03046	2	Adamts1
ENSMUSG00000023353	MGLibB_03367	2	Agap3
ENSMUSG00000024259	MGLibA_49120	2	Slc25a46
ENSMUSG00000024388	MGLibB_32977	2	Myo7b
ENSMUSG00000024515	MGLibA_49956	2	Smad4
ENSMUSG00000025515	MGLibB_32594	2	Muc2
ENSMUSG00000025934	MGLibB_23158	2	Gsta3
ENSMUSG00000026558	MGLibB_57113	2	Uck2
ENSMUSG00000027481	MGLibB_07101	2	Bpifb2
ENSMUSG00000027890	MGLibB_23179	2	Gstm4
ENSMUSG00000028488	MGLibB_48284	2	Sh3gl2
ENSMUSG00000028541	MGLibB_06196	2	B4galt2
ENSMUSG00000028909	MGLibA_43832	2	Ptpru
ENSMUSG00000029577	MGLibA_56994	2	Ube3b
ENSMUSG00000029917	MGLibB_07414	2	C130060K24Rik
ENSMUSG00000030172	MGLibB_16444	2	Erc1
ENSMUSG00000030523	MGLibA_56072	2	Trpm1
ENSMUSG00000030741	MGLibA_51045	2	Spns1
ENSMUSG00000031145	MGLibB_42667	2	Prickle3
ENSMUSG00000031146	MGLibA_41555	2	Plp2
ENSMUSG00000031936	MGLibA_24005	2	Hephl1
ENSMUSG00000032902	MGLibA_48801	2	Slc16a1
ENSMUSG00000033102	MGLibB_09295	2	Cdc14b
ENSMUSG00000038665	MGLibA_14028	2	Dgki
ENSMUSG00000039059	MGLibB_24843	2	Hrh3
ENSMUSG00000039376	MGLibA_52363	2	Synpo2l
ENSMUSG00000039410	MGLibA_42589	2	Prdm16
ENSMUSG00000039699	MGLibA_06560	2	Batf2
ENSMUSG00000040455	MGLibB_57601	2	Usp45
ENSMUSG00000040532	MGLibB_02408	2	Abhd11
ENSMUSG00000041057	MGLibB_59288	2	Wdr43
ENSMUSG00000042870	MGLibA_55305	2	Tom1
ENSMUSG00000045052	MGLibA_42875	2	Prlhr
ENSMUSG00000047363	MGLibA_12223	2	Cstad
ENSMUSG00000049737	MGLibA_36397	2	Olfr1361
ENSMUSG00000051615	MGLibA_44516	2	Rap2a
ENSMUSG00000052917	MGLibA_47729	2	Senp7
ENSMUSG00000053310	MGLibB_34752	2	Nrgn
ENSMUSG00000053338	MGLibA_52707	2	Tarm1
ENSMUSG00000056632	MGLibB_14956	2	Dsg3
ENSMUSG00000057674	MGLibB_20460	2	Gm11938
ENSMUSG00000058833	MGLibA_01010	2	2810428I15Rik
ENSMUSG00000059070	MGLibB_46164	2	Rpl18
ENSMUSG00000062270	MGLibA_31707	2	Morf4l1
ENSMUSG00000062727	MGLibB_24279	2	Hist1h2bk
ENSMUSG00000069769	MGLibB_32301	2	Msi2
ENSMUSG00000070000	MGLibB_18141	2	Fcho1
ENSMUSG00000075478	MGLibA_49883	2	Slitrk1
ENSMUSG00000075700	MGLibA_47651	2	Selt
ENSMUSG00000079364	MGLibB_21307	2	Gm3558
ENSMUSG00000079387	MGLibA_29762	2	Luzp4
ENSMUSG00000079395	MGLibA_20895	2	Gm15114
ENSMUSG00000079409	MGLibB_21699	2	Gm5795
ENSMUSG00000090550	MGLibB_42865	2	Prlh
ENSMUSG00000091049	MGLibB_21053	2	Gm1979
ENSMUSG00000091670	MGLibB_58551	2	Vmn2r105
ENSMUSG00000091923	MGLibA_21983	2	Gm8267
ENSMUSG00000094542	MGLibA_58043	2	Vmn1r149
ENSMUSG00000094595	MGLibB_18966	2	Fsbp
ENSMUSG00000094885	MGLibA_39106	2	Ott
ENSMUSG00000095293	MGLibB_20228	2	Gm10058
ENSMUSG00000095533	MGLibB_20299	2	Gm10413
ENSMUSG00000095550	MGLibB_21179	2	Gm21671
ENSMUSG00000095621	MGLibA_20875	2	Gm15085
ENSMUSG00000095655	MGLibA_20797	2	Gm14479
ENSMUSG00000096097	MGLibA_20791	2	Gm14477
ENSMUSG00000096601	MGLibA_22024	2	Gm8720
ENSMUSG00000097328	MGLibA_55155	2	Tnfsf12
ENSMUSG00000101819	MGLibA_20782	2	Gm14474
mmu-mir-6967	MGLibA_63636	2	mmu-mir-6967
mmu-mir-7221	MGLibA_64403	2	mmu-mir-7221
mmu-mir-7681	MGLibA_61872	2	mmu-mir-7681
mmu-mir-8102	MGLibA_62521	2	mmu-mir-8102
NonTargetingControlGuideForMouse	0488_MGLibB_62292	2	NonTargetingControlGuideForMouse
NonTargetingControlGuideForMouse	0531_MGLibA_66936	2	NonTargetingControlGuideForMouse
NonTargetingControlGuideForMouse	0384_MGLibA_66789	2	NonTargetingControlGuideForMouse
NonTargetingControlGuideForMouse	0327_MGLibA_66732	2	NonTargetingControlGuideForMouse
NonTargetingControlGuideForMouse	0034_MGLibA_66439	2	NonTargetingControlGuideForMouse
NonTargetingControlGuideForMouse	0527_MGLibA_66932	2	NonTargetingControlGuideForMouse
NonTargetingControlGuideForMouse	0676_MGLibB_62480	2	NonTargetingControlGuideForMouse
NonTargetingControlGuideForMouse	0884_MGLibA_67289	2	NonTargetingControlGuideForMouse
NonTargetingControlGuideForMouse	0366_MGLibB_62170	2	NonTargetingControlGuideForMouse
NonTargetingControlGuideForMouse	0319_MGLibA_66724	2	NonTargetingControlGuideForMouse
NonTargetingControlGuideForMouse	0285_MGLibB_62089	2	NonTargetingControlGuideForMouse
NonTargetingControlGuideForMouse	0527_MGLibB_62331	2	NonTargetingControlGuideForMouse
Ppap2a	MGLibA_42092	2	Ppap2a
Cml2	MGLibB_10958	1	Cml2
ENSMUSG00000001054	MGLibB_45687	1	Rmnd5b
ENSMUSG00000001472	MGLibA_53135	1	Tcf25
ENSMUSG00000001521	MGLibA_56651	1	Tulp3
ENSMUSG00000001729	MGLibA_03717	1	Akt1
ENSMUSG00000001985	MGLibA_22974	1	Grik3
ENSMUSG00000005628	MGLibA_54954	1	Tmod4
ENSMUSG00000009079	MGLibB_16771	1	Ewsr1
ENSMUSG00000009549	MGLibB_51290	1	Srp14
ENSMUSG00000009654	MGLibA_35443	1	Oit3
ENSMUSG00000010796	MGLibB_05560	1	Asz1
ENSMUSG00000013353	MGLibA_01444	1	4931406B18Rik
ENSMUSG00000015790	MGLibB_52124	1	Surf1
ENSMUSG00000017485	MGLibA_55353	1	Top2b
ENSMUSG00000018287	MGLibB_50722	1	Spag7
ENSMUSG00000018476	MGLibB_27252	1	Kdm6b
ENSMUSG00000019772	MGLibA_57906	1	Vip
ENSMUSG00000020564	MGLibB_06001	1	Atxn7l1
ENSMUSG00000020581	MGLibB_03448	1	Agr2
ENSMUSG00000020599	MGLibB_45339	1	Rgs9
ENSMUSG00000021431	MGLibB_50318	1	Snrnp48
ENSMUSG00000021569	MGLibB_55908	1	Trip13
ENSMUSG00000021635	MGLibB_44313	1	Rad17
ENSMUSG00000021867	MGLibA_54679	1	Tmem254b
ENSMUSG00000022787	MGLibB_59316	1	Wdr53
ENSMUSG00000022832	MGLibB_46048	1	Ropn1
ENSMUSG00000022868	MGLibA_03517	1	Ahsg
ENSMUSG00000022883	MGLibA_46030	1	Robo1
ENSMUSG00000024273	MGLibA_00969	1	2700062C07Rik
ENSMUSG00000024293	MGLibA_16575	1	Esco1
ENSMUSG00000024300	MGLibB_32946	1	Myo1f
ENSMUSG00000024421	MGLibB_28382	1	Lama3
ENSMUSG00000025040	MGLibB_19058	1	Fundc1
ENSMUSG00000025333	MGLibA_22601	1	Gpr143
ENSMUSG00000025739	MGLibA_22244	1	Gng13
ENSMUSG00000025867	MGLibB_11689	1	Cplx2
ENSMUSG00000025905	MGLibB_38912	1	Oprk1
ENSMUSG00000025955	MGLibB_03704	1	Akr1cl
ENSMUSG00000027099	MGLibB_32572	1	Mtx2
ENSMUSG00000027469	MGLibB_55498	1	Tpx2
ENSMUSG00000028444	MGLibA_11154	1	Cntfr
ENSMUSG00000028563	MGLibA_54068	1	Tm2d1
ENSMUSG00000029061	MGLibA_31564	1	Mmp23
ENSMUSG00000029534	MGLibA_51595	1	St7
ENSMUSG00000030001	MGLibA_18455	1	Figla
ENSMUSG00000030055	MGLibB_44216	1	Rab43
ENSMUSG00000030319	MGLibB_07904	1	Cand2
ENSMUSG00000030525	MGLibB_10346	1	Chrna7
ENSMUSG00000031636	MGLibA_40247	1	Pdlim3
ENSMUSG00000031755	MGLibB_06602	1	Bbs2
ENSMUSG00000031988	MGLibB_58956	1	Vps26b
ENSMUSG00000032263	MGLibB_06663	1	Bckdhb
ENSMUSG00000032940	MGLibA_44745	1	Rbm11
ENSMUSG00000033128	MGLibA_19827	1	Gga1
ENSMUSG00000034765	MGLibA_15114	1	Dusp5
ENSMUSG00000034855	MGLibB_12539	1	Cxcl10
ENSMUSG00000037924	MGLibB_36810	1	Olfr16
ENSMUSG00000038859	MGLibA_06509	1	Baiap2l1
ENSMUSG00000039633	MGLibA_29168	1	Lonrf1
ENSMUSG00000040524	MGLibB_60953	1	Zfp609
ENSMUSG00000040715	MGLibA_46586	1	Rsc1a1
ENSMUSG00000045179	MGLibB_50621	1	Sox3
ENSMUSG00000045867	MGLibA_11813	1	Cradd
ENSMUSG00000046179	MGLibA_15310	1	E2f8
ENSMUSG00000046836	MGLibA_07219	1	Brox
ENSMUSG00000047798	MGLibA_09127	1	Cd300lf
ENSMUSG00000048013	MGLibB_28023	1	Krt35
ENSMUSG00000050199	MGLibA_28848	1	Lgr4
ENSMUSG00000050625	MGLibB_08345	1	Ccdc121
ENSMUSG00000051212	MGLibA_22672	1	Gpr183
ENSMUSG00000051934	MGLibB_50836	1	Spats2
ENSMUSG00000056553	MGLibB_43799	1	Ptprn2
ENSMUSG00000057667	MGLibA_06944	1	Bloc1s3
ENSMUSG00000059645	MGLibB_21924	1	Gm7361
ENSMUSG00000059874	MGLibB_37837	1	Olfr603
ENSMUSG00000059874	MGLibB_37836	1	Olfr603
ENSMUSG00000060244	MGLibB_03952	1	Alyref2
ENSMUSG00000060556	MGLibA_36537	1	Olfr1418
ENSMUSG00000061353	MGLibA_12548	1	Cxcl12
ENSMUSG00000062757	MGLibB_35953	1	Olfr1206
ENSMUSG00000066072	MGLibA_12924	1	Cyp4a10
ENSMUSG00000066372	MGLibB_58785	1	Vmn2r65
ENSMUSG00000068962	MGLibB_60401	1	Zfp114
ENSMUSG00000070372	MGLibB_07979	1	Capza1
ENSMUSG00000070501	MGLibB_06434	1	BC094916
ENSMUSG00000072601	MGLibB_15354	1	Ear1
ENSMUSG00000072726	MGLibB_21706	1	Gm5797
ENSMUSG00000072923	MGLibB_20304	1	Gm10439
ENSMUSG00000072930	MGLibA_20890	1	Gm15107
ENSMUSG00000073116	MGLibB_20311	1	Gm10471
ENSMUSG00000073267	MGLibB_21059	1	Gm1993
ENSMUSG00000073551	MGLibB_50978	1	Spink13
ENSMUSG00000073953	MGLibA_37824	1	Olfr596
ENSMUSG00000074872	MGLibB_12452	1	Ctxn2
ENSMUSG00000078324	MGLibB_21240	1	Gm2933
ENSMUSG00000078995	MGLibB_60779	1	Zfp456
ENSMUSG00000079655	MGLibB_21580	1	Gm5168
ENSMUSG00000081218	MGLibB_21385	1	Gm4297
ENSMUSG00000090700	MGLibB_12970	1	Cyp4f40
ENSMUSG00000091945	MGLibB_58581	1	Vmn2r114
ENSMUSG00000093696	MGLibA_58503	1	Vmn1r7
ENSMUSG00000093868	MGLibB_21105	1	Gm20809
ENSMUSG00000093871	MGLibA_21376	1	Gm4187
ENSMUSG00000094010	MGLibA_57972	1	Vmn1r119
ENSMUSG00000094269	MGLibA_38693	1	Olfr951
ENSMUSG00000094273	MGLibA_20367	1	Gm10922
ENSMUSG00000094307	MGLibA_20736	1	Gm14347
ENSMUSG00000094309	MGLibB_22106	1	Gmcl1l
ENSMUSG00000094385	MGLibA_57987	1	Vmn1r123
ENSMUSG00000094596	MGLibA_20364	1	Gm10921
ENSMUSG00000094624	MGLibB_21460	1	Gm4836
ENSMUSG00000094700	MGLibB_58040	1	Vmn1r158
ENSMUSG00000094759	MGLibB_20318	1	Gm10487
ENSMUSG00000094876	MGLibA_20730	1	Gm14345
ENSMUSG00000094904	MGLibA_20788	1	Gm14476
ENSMUSG00000094905	MGLibA_58055	1	Vmn1r155
ENSMUSG00000094941	MGLibA_20881	1	Gm15093
ENSMUSG00000095217	MGLibB_24289	1	Hist1h2bn
ENSMUSG00000095445	MGLibA_20785	1	Gm14475
ENSMUSG00000095550	MGLibB_21181	1	Gm21671
ENSMUSG00000095716	MGLibB_20730	1	Gm14351
ENSMUSG00000095814	MGLibA_20742	1	Gm14374
ENSMUSG00000095887	MGLibB_20237	1	Gm10096
ENSMUSG00000095973	MGLibA_57963	1	Vmn1r116
ENSMUSG00000096152	MGLibA_20980	1	Gm16442
ENSMUSG00000096620	MGLibB_21583	1	Gm5169
ENSMUSG00000096761	MGLibA_21691	1	Gm5726
ENSMUSG00000100200	MGLibA_00302	1	1700012L04Rik
ENSMUSG00000100626	MGLibA_20803	1	Gm14483
ENSMUSG00000109865	MGLibA_25022	1	Hspa14
Gm14446	MGLibB_20764	1	Gm14446
Gm5077	MGLibB_21528	1	Gm5077
Gm6484	MGLibB_21815	1	Gm6484
Gm766	MGLibB_21943	1	Gm766
mmu-mir-298	MGLibA_64516	1	mmu-mir-298
mmu-mir-3085	MGLibA_63981	1	mmu-mir-3085
NonTargetingControlGuideForMouse	0513_MGLibB_62317	1	NonTargetingControlGuideForMouse

## Sheet: FACS-2
gene	unique.id	count	name
ENSMUSG00000024576	MGLibB_12129	952583	Csnk1a1
ENSMUSG00000029564	MGLibB_01333	523878	4930519G04Rik
ENSMUSG00000042801	MGLibA_38265	489942	Olfr769
ENSMUSG00000026812	MGLibA_56143	469508	Tsc1
ENSMUSG00000054716	MGLibA_61183	459652	Zfp771
ENSMUSG00000059552	MGLibB_56015	201287	Trp53
ENSMUSG00000102976	MGLibA_60156	179019	Zc3h11a
ENSMUSG00000032480	MGLibA_14112	99810	Dhx30
ENSMUSG00000059552	MGLibA_56034	12912	Trp53
ENSMUSG00000028106	MGLibA_46337	5590	Rprd2
NonTargetingControlGuideForMouse	0268_MGLibA_66673	2307	NonTargetingControlGuideForMouse
NonTargetingControlGuideForMouse	0268_MGLibB_62072	1940	NonTargetingControlGuideForMouse
ENSMUSG00000019659	MGLibA_08364	1611	Ccdc12
ENSMUSG00000016493	MGLibA_09179	1493	Cd46
ENSMUSG00000053113	MGLibA_50507	1491	Socs3
ENSMUSG00000062190	MGLibA_28449	1438	Lancl2
ENSMUSG00000040511	MGLibA_43918	1231	Pvr
ENSMUSG00000074397	MGLibB_18850	1131	Foxr1
ENSMUSG00000043313	MGLibB_39793	854	Pcdhb19
ENSMUSG00000006218	MGLibB_17141	784	Fam131c
ENSMUSG00000055553	MGLibA_28288	784	Kxd1
mmu-mir-3080	MGLibA_63385	707	mmu-mir-3080
ENSMUSG00000033902	MGLibA_30397	549	Mapkbp1
ENSMUSG00000074378	MGLibB_07259	406	Bsph1
ENSMUSG00000022347	MGLibB_01912	253	A1bg
ENSMUSG00000009073	MGLibA_33840	241	Nf2
ENSMUSG00000048402	MGLibA_20091	231	Gli2
ENSMUSG00000057230	MGLibB_02208	227	Aak1
ENSMUSG00000095061	MGLibB_15247	217	E030018B13Rik
ENSMUSG00000074434	MGLibA_21849	216	Gm6696
ENSMUSG00000079113	MGLibA_21964	210	Gm7861
ENSMUSG00000094687	MGLibA_13734	206	Defa25
ENSMUSG00000079114	MGLibA_21961	205	Gm7849
ENSMUSG00000061958	MGLibA_20859	204	Gm14851
ENSMUSG00000082211	MGLibB_20908	198	Gm15299
ENSMUSG00000058618	MGLibB_02178	184	AY761184
ENSMUSG00000024968	MGLibA_44961	148	Rcor2
ENSMUSG00000032572	MGLibA_11365	144	Col6a4
ENSMUSG00000059552	MGLibA_56035	143	Trp53
ENSMUSG00000067150	MGLibA_59792	127	Xpo5
ENSMUSG00000075382	MGLibB_37230	113	Olfr353
ENSMUSG00000054752	MGLibB_18983	105	Fsd1l
ENSMUSG00000059552	MGLibB_56013	101	Trp53
ENSMUSG00000036480	MGLibA_43264	99	Prss56
ENSMUSG00000053113	MGLibA_50508	79	Socs3
ENSMUSG00000092118	MGLibA_17763	78	Fancf
ENSMUSG00000036513	MGLibA_11414	75	Commd2
ENSMUSG00000053113	MGLibB_50492	69	Socs3
ENSMUSG00000031145	MGLibB_42667	68	Prickle3
ENSMUSG00000025648	MGLibB_40490	66	Pfkfb4
ENSMUSG00000030859	MGLibA_17519	64	Fam24a
ENSMUSG00000028062	MGLibA_28433	61	Lamtor2
ENSMUSG00000061298	MGLibA_03381	60	Agbl4
ENSMUSG00000037098	MGLibB_44073	55	Rab11fip3
ENSMUSG00000009073	MGLibA_33838	54	Nf2
ENSMUSG00000048960	MGLibB_42643	50	Prex2
ENSMUSG00000063163	MGLibA_50890	46	Speer2
ENSMUSG00000063234	MGLibB_22774	44	Gpr84
ENSMUSG00000070448	MGLibA_58882	43	Vmn2r89
ENSMUSG00000059382	MGLibA_52777	41	Tas2r120
ENSMUSG00000024621	MGLibB_12071	39	Csf1r
ENSMUSG00000078671	MGLibB_10156	38	Chd2
ENSMUSG00000061702	MGLibB_54895	36	Tmem91
ENSMUSG00000042380	MGLibB_50077	35	Smim12
ENSMUSG00000048216	MGLibA_22783	34	Gpr85
ENSMUSG00000022414	MGLibA_52512	33	Tab1
mmu-mir-3067	MGLibA_62661	33	mmu-mir-3067
ENSMUSG00000063823	MGLibA_37667	31	Olfr532
ENSMUSG00000045132	MGLibB_37884	27	Olfr620
ENSMUSG00000072941	MGLibA_50528	27	Sod3
ENSMUSG00000032652	MGLibA_11864	25	Crebl2
ENSMUSG00000028927	MGLibB_39303	24	Padi2
ENSMUSG00000024082	MGLibB_33571	20	Ndufaf7
ENSMUSG00000038143	MGLibB_51846	20	Stox2
ENSMUSG00000045871	MGLibA_49899	20	Slitrk6
ENSMUSG00000075115	MGLibB_35939	20	Olfr1200
ENSMUSG00000025466	MGLibA_19071	19	Fuom
ENSMUSG00000028978	MGLibB_34418	19	Nos3
ENSMUSG00000052581	MGLibA_29616	19	Lrrtm4
ENSMUSG00000026638	MGLibA_26317	18	Irf6
ENSMUSG00000028161	MGLibB_42426	17	Ppp3ca
ENSMUSG00000031809	MGLibA_00349	17	1700018B08Rik
ENSMUSG00000042363	MGLibB_28819	17	Lgalsl
ENSMUSG00000091039	MGLibA_28171	17	Krtap20-2
ENSMUSG00000020447	MGLibB_34492	16	Npc1l1
ENSMUSG00000052102	MGLibA_22289	16	Gnpda1
ENSMUSG00000079698	MGLibA_58898	16	Vmn2r93
ENSMUSG00000025169	MGLibB_35409	15	Ogfod3
ENSMUSG00000073802	MGLibB_09614	15	Cdkn2b
ENSMUSG00000074794	MGLibA_05291	15	Arrdc3
ENSMUSG00000031918	MGLibA_32514	14	Mtmr2
ENSMUSG00000090129	MGLibB_37064	14	Olfr287
ENSMUSG00000016921	MGLibB_51381	13	Srsf6
ENSMUSG00000020196	MGLibB_07618	12	Cabin1
ENSMUSG00000048154	MGLibA_27881	12	Kmt2d
ENSMUSG00000073956	MGLibB_37805	12	Olfr592
ENSMUSG00000013158	MGLibA_01533	10	4933405L10Rik
ENSMUSG00000030008	MGLibA_42512	10	Pradc1
ENSMUSG00000049807	MGLibB_04922	10	Arhgap23
ENSMUSG00000051934	MGLibB_50838	10	Spats2
ENSMUSG00000016206	MGLibB_23536	9	H2-M3
ENSMUSG00000040528	MGLibB_31338	9	Milr1
ENSMUSG00000092243	MGLibB_21882	9	Gm7030
ENSMUSG00000025515	MGLibB_32594	8	Muc2
ENSMUSG00000089715	MGLibB_08254	8	Cbx6
ENSMUSG00000001419	MGLibB_30889	7	Mef2d
ENSMUSG00000021096	MGLibA_42218	7	Ppm1a
ENSMUSG00000043388	MGLibA_54305	7	Tmem130
ENSMUSG00000058119	MGLibB_21696	7	Gm5771
ENSMUSG00000059625	MGLibB_50524	7	Sohlh1
ENSMUSG00000028439	MGLibA_17478	6	Fam219a
ENSMUSG00000032633	MGLibB_18537	6	Flcn
ENSMUSG00000037025	MGLibB_18730	6	Foxa2
ENSMUSG00000037225	MGLibA_18338	6	Fgf2
ENSMUSG00000039323	MGLibA_25569	6	Igfbp2
ENSMUSG00000040183	MGLibB_04335	6	Ankrd6
ENSMUSG00000047731	MGLibA_59188	6	Wbp1l
ENSMUSG00000067545	MGLibB_36528	6	Olfr1419
ENSMUSG00000075195	MGLibB_35588	6	Olfr1048
ENSMUSG00000004846	MGLibB_41537	5	Plod3
ENSMUSG00000013076	MGLibB_04028	5	Amotl1
ENSMUSG00000027381	MGLibB_06694	5	Bcl2l11
ENSMUSG00000033998	MGLibB_27029	5	Kcnk1
ENSMUSG00000040570	MGLibB_46723	5	Rundc3b
ENSMUSG00000054905	MGLibA_51744	5	Stfa3
ENSMUSG00000057594	MGLibB_05129	5	Arl16
ENSMUSG00000067925	MGLibA_12599	5	Cxx1a
ENSMUSG00000074361	MGLibA_07558	5	C5ar2
ENSMUSG00000074909	MGLibA_44485	5	Ranbp6
ENSMUSG00000089837	MGLibB_34501	5	Npcd
ENSMUSG00000094845	MGLibA_54919	5	Tmem95
NonTargetingControlGuideForMouse	0782_MGLibB_62586	5	NonTargetingControlGuideForMouse
ENSMUSG00000001089	MGLibA_29757	4	Luzp1
ENSMUSG00000006675	MGLibA_39256	4	P4htm
ENSMUSG00000019179	MGLibB_30743	4	Mdh2
ENSMUSG00000022707	MGLibB_19550	4	Gbe1
ENSMUSG00000025821	MGLibA_60575	4	Zfp282
ENSMUSG00000038346	MGLibB_60677	4	Zfp384
ENSMUSG00000057604	MGLibB_29081	4	Lmcd1
ENSMUSG00000068134	MGLibA_60434	4	Zfp120
ENSMUSG00000075199	MGLibA_37658	4	Olfr52
mmu-mir-7679	MGLibA_62467	4	mmu-mir-7679
1200014J11Rik	MGLibB_00149	3	1200014J11Rik
ENSMUSG00000001542	MGLibA_15963	3	Ell2
ENSMUSG00000003308	MGLibB_27268	3	Keap1
ENSMUSG00000015804	MGLibA_30859	3	Med28
ENSMUSG00000020205	MGLibA_40747	3	Phlda1
ENSMUSG00000021961	MGLibA_01422	3	4930578I06Rik
ENSMUSG00000022178	MGLibA_03570	3	Ajuba
ENSMUSG00000025269	MGLibB_04609	3	Apex2
ENSMUSG00000027379	MGLibA_07372	3	Bub1
ENSMUSG00000028188	MGLibB_50759	3	Spata1
ENSMUSG00000028647	MGLibA_32793	3	Mycbp
ENSMUSG00000029436	MGLibB_31539	3	Mmp17
ENSMUSG00000030588	MGLibA_59890	3	Yif1b
ENSMUSG00000034701	MGLibB_33803	3	Neurod1
ENSMUSG00000037896	MGLibB_44947	3	Rcor1
ENSMUSG00000038508	MGLibB_19692	3	Gdf15
ENSMUSG00000039205	MGLibB_10513	3	Ciz1
ENSMUSG00000041567	MGLibA_47798	3	Serpina12
ENSMUSG00000051403	MGLibB_42336	3	Ppp1r37
ENSMUSG00000056598	MGLibA_29482	3	Lrrc48
ENSMUSG00000060397	MGLibB_60418	3	Zfp128
ENSMUSG00000062609	MGLibB_26983	3	Kcnj15
ENSMUSG00000067924	MGLibA_12602	3	Cxx1b
NonTargetingControlGuideForMouse	0782_MGLibA_67187	3	NonTargetingControlGuideForMouse
ENSMUSG00000000157	MGLibA_26507	2	Itgb2l
ENSMUSG00000000263	MGLibA_20136	2	Glra1
ENSMUSG00000014554	MGLibB_14031	2	Dguok
ENSMUSG00000014606	MGLibA_49004	2	Slc25a11
ENSMUSG00000015980	MGLibB_29417	2	Lrrc27
ENSMUSG00000016024	MGLibB_28514	2	Lbp
ENSMUSG00000017718	MGLibB_03350	2	Afmid
ENSMUSG00000019803	MGLibA_34676	2	Nr2e1
ENSMUSG00000020190	MGLibA_31414	2	Mknk2
ENSMUSG00000021539	MGLibB_28713	2	Lect2
ENSMUSG00000021944	MGLibB_19509	2	Gata4
ENSMUSG00000023064	MGLibA_50293	2	Sncg
ENSMUSG00000024191	MGLibB_07034	2	Bnip1
ENSMUSG00000024521	MGLibA_41628	2	Pmaip1
ENSMUSG00000024858	MGLibB_03289	2	Adrbk1
ENSMUSG00000024867	MGLibB_41030	2	Pip5k1b
ENSMUSG00000025223	MGLibB_28657	2	Ldb1
ENSMUSG00000026249	MGLibB_47938	2	Serpine2
ENSMUSG00000026254	MGLibB_15855	2	Eif4e2
ENSMUSG00000026662	MGLibB_47722	2	Sephs1
ENSMUSG00000026946	MGLibA_34281	2	Nmi
ENSMUSG00000027187	MGLibB_08175	2	Cat
ENSMUSG00000027977	MGLibA_33511	2	Ndst3
ENSMUSG00000028938	MGLibA_19413	2	Galntl5
ENSMUSG00000029032	MGLibA_05009	2	Arhgef16
ENSMUSG00000029868	MGLibA_56118	2	Trpv6
ENSMUSG00000030127	MGLibB_11480	2	Cops7a
ENSMUSG00000030339	MGLibA_29718	2	Ltbr
ENSMUSG00000030472	MGLibB_09699	2	Ceacam18
ENSMUSG00000030521	MGLibA_31769	2	Mphosph10
ENSMUSG00000030589	MGLibA_44626	2	Rasgrp4
ENSMUSG00000033429	MGLibA_30625	2	Mcee
ENSMUSG00000035152	MGLibB_04514	2	Ap2b1
ENSMUSG00000035900	MGLibB_22885	2	Gramd4
ENSMUSG00000036098	MGLibA_33041	2	Myrf
ENSMUSG00000040321	MGLibA_61180	2	Zfp770
ENSMUSG00000040464	MGLibA_23305	2	Gtpbp10
ENSMUSG00000040680	MGLibA_27947	2	Kremen2
ENSMUSG00000041229	MGLibB_40710	2	Phf8
ENSMUSG00000041926	MGLibA_46024	2	Rnpep
ENSMUSG00000042212	MGLibB_51110	2	Sprr2d
ENSMUSG00000042272	MGLibB_47985	2	Sestd1
ENSMUSG00000042894	MGLibA_36118	2	Olfr1260
ENSMUSG00000043144	MGLibA_04797	2	Aqp6
ENSMUSG00000043857	MGLibB_31210	2	Mgat5b
ENSMUSG00000044705	MGLibA_38024	2	Olfr670
ENSMUSG00000046750	MGLibA_06427	2	BC089491
ENSMUSG00000046947	MGLibA_03120	2	Adck2
ENSMUSG00000049010	MGLibB_38764	2	Olfr982
ENSMUSG00000050106	MGLibA_54157	2	Tmc8
ENSMUSG00000050350	MGLibA_22677	2	Gpr18
ENSMUSG00000055884	MGLibB_17767	2	Fancm
ENSMUSG00000056055	MGLibA_46916	2	Sag
ENSMUSG00000061584	MGLibA_29831	2	Lyg2
ENSMUSG00000062646	MGLibA_19441	2	Ganc
ENSMUSG00000064065	MGLibB_26173	2	Ipcef1
ENSMUSG00000066975	MGLibA_12011	2	Cryba4
ENSMUSG00000071350	MGLibB_48021	2	Setdb2
ENSMUSG00000075084	MGLibB_36056	2	Olfr1243
ENSMUSG00000078572	MGLibA_00650	2	1810043H04Rik
ENSMUSG00000078671	MGLibA_10157	2	Chd2
ENSMUSG00000079579	MGLibA_21853	2	Gm6760
ENSMUSG00000094496	MGLibB_38316	2	Olfr792
ENSMUSG00000099327	MGLibA_62711	2	mmu-mir-493
mmu-mir-34a	MGLibA_64916	2	mmu-mir-34a
mmu-mir-5116	MGLibA_66163	2	mmu-mir-5116
mmu-mir-5619	MGLibA_65018	2	mmu-mir-5619
mmu-mir-7687	MGLibA_65836	2	mmu-mir-7687
NonTargetingControlGuideForMouse	0744_MGLibB_62548	2	NonTargetingControlGuideForMouse
NonTargetingControlGuideForMouse	0851_MGLibB_62655	2	NonTargetingControlGuideForMouse
3110047P20Rik	MGLibA_01059	1	3110047P20Rik
6-Mar	MGLibA_01690	1	6-Mar
ENSMUSG00000000159	MGLibA_25631	1	Igsf5
ENSMUSG00000001552	MGLibA_26744	1	Jup
ENSMUSG00000001911	MGLibB_33881	1	Nfix
ENSMUSG00000001942	MGLibB_48432	1	Siae
ENSMUSG00000002342	MGLibB_54376	1	Tmem161a
ENSMUSG00000003037	MGLibA_44260	1	Rab8a
ENSMUSG00000003526	MGLibB_42932	1	Prodh
ENSMUSG00000004897	MGLibB_23899	1	Hdgf
ENSMUSG00000005268	MGLibB_42868	1	Prlr
ENSMUSG00000005470	MGLibA_05454	1	Asf1b
ENSMUSG00000008874	MGLibA_10734	1	Clec3a
ENSMUSG00000009739	MGLibB_42061	1	Pou6f1
ENSMUSG00000009907	MGLibB_59002	1	Vps4b
ENSMUSG00000010095	MGLibA_49481	1	Slc3a2
ENSMUSG00000011257	MGLibA_39275	1	Pabpc4
ENSMUSG00000013622	MGLibA_05964	1	Atraid
ENSMUSG00000013846	MGLibB_51531	1	St3gal1
ENSMUSG00000014498	MGLibB_04312	1	Ankrd52
ENSMUSG00000014602	MGLibA_27354	1	Kif1a
ENSMUSG00000015087	MGLibA_44312	1	Rabl6
ENSMUSG00000015932	MGLibB_14971	1	Dstn
ENSMUSG00000017311	MGLibB_43986	1	Pyy
ENSMUSG00000019082	MGLibA_49042	1	Slc25a22
ENSMUSG00000020170	MGLibA_18960	1	Frs2
ENSMUSG00000020300	MGLibA_11670	1	Cpeb4
ENSMUSG00000020986	MGLibA_47552	1	Sec23a
ENSMUSG00000021096	MGLibA_42219	1	Ppm1a
ENSMUSG00000021365	MGLibB_33675	1	Nedd9
ENSMUSG00000021373	MGLibA_07914	1	Cap2
ENSMUSG00000021771	MGLibB_57819	1	Vdac2
ENSMUSG00000022057	MGLibA_03015	1	Adamdec1
ENSMUSG00000022105	MGLibA_44692	1	Rb1
ENSMUSG00000022193	MGLibB_43398	1	Psmb5
ENSMUSG00000022471	MGLibB_59804	1	Xrcc6
ENSMUSG00000022485	MGLibA_24731	1	Hoxc5
ENSMUSG00000022550	MGLibB_03129	1	Adck5
ENSMUSG00000023031	MGLibA_09752	1	Cela1
ENSMUSG00000023755	MGLibB_45381	1	Rhebl1
ENSMUSG00000023972	MGLibA_43681	1	Ptk7
ENSMUSG00000024043	MGLibA_04935	1	Arhgap28
ENSMUSG00000024170	MGLibB_53354	1	Telo2
ENSMUSG00000025016	MGLibB_54095	1	Tm9sf3
ENSMUSG00000025020	MGLibB_49860	1	Slit1
ENSMUSG00000025241	MGLibA_19141	1	Fyco1
ENSMUSG00000025402	MGLibB_33130	1	Nab2
ENSMUSG00000025582	MGLibB_34588	1	Nptx1
ENSMUSG00000025868	MGLibA_24162	1	Higd2a
ENSMUSG00000025967	MGLibA_15531	1	Eef1b2
ENSMUSG00000026082	MGLibA_45157	1	Rev1
ENSMUSG00000026409	MGLibA_40495	1	Pfkfb2
ENSMUSG00000026858	MGLibA_17662	1	Fam73b
ENSMUSG00000026926	MGLibA_41660	1	Pmpca
ENSMUSG00000026934	MGLibB_28883	1	Lhx3
ENSMUSG00000027246	MGLibB_15958	1	Ell3
ENSMUSG00000027297	MGLibB_29721	1	Ltk
ENSMUSG00000027312	MGLibB_05975	1	Atrn
ENSMUSG00000028124	MGLibA_19643	1	Gclm
ENSMUSG00000028309	MGLibA_45916	1	Rnf20
ENSMUSG00000028771	MGLibB_43714	1	Ptpn12
ENSMUSG00000028964	MGLibA_39520	1	Park7
ENSMUSG00000029110	MGLibB_45968	1	Rnf4
ENSMUSG00000029512	MGLibA_57280	1	Ulk1
ENSMUSG00000029811	MGLibB_04459	1	Aoc1
ENSMUSG00000030265	MGLibB_27925	1	Kras
ENSMUSG00000030443	MGLibA_60933	1	Zfp583
ENSMUSG00000030543	MGLibA_30979	1	Mesp2
ENSMUSG00000030706	MGLibB_32091	1	Mrpl48
ENSMUSG00000030730	MGLibA_05763	1	Atp2a1
ENSMUSG00000030760	MGLibB_02614	1	Acer3
ENSMUSG00000031137	MGLibA_18306	1	Fgf13
ENSMUSG00000031330	MGLibB_60201	1	Zcchc13
ENSMUSG00000031358	MGLibB_32315	1	Msl3
ENSMUSG00000031755	MGLibB_06602	1	Bbs2
ENSMUSG00000032280	MGLibA_53997	1	Tle3
ENSMUSG00000032554	MGLibB_55662	1	Trf
ENSMUSG00000032606	MGLibA_34008	1	Nicn1
ENSMUSG00000033006	MGLibB_50585	1	Sox10
ENSMUSG00000033249	MGLibB_24984	1	Hsf4
ENSMUSG00000033478	MGLibB_17219	1	Fam160b1
ENSMUSG00000033735	MGLibB_51158	1	Spr
ENSMUSG00000033855	MGLibB_51835	1	Ston1
ENSMUSG00000034336	MGLibA_26000	1	Ina
ENSMUSG00000035248	MGLibB_60232	1	Zcchc6
ENSMUSG00000035367	MGLibA_45687	1	Rmi1
ENSMUSG00000035673	MGLibB_47078	1	Sbno2
ENSMUSG00000036052	MGLibB_14477	1	Dnajb5
ENSMUSG00000036908	MGLibB_57331	1	Unc93b1
ENSMUSG00000037185	MGLibA_28085	1	Krt80
ENSMUSG00000037790	MGLibB_13865	1	Defb7
ENSMUSG00000037790	MGLibB_13864	1	Defb7
ENSMUSG00000038502	MGLibB_43682	1	Ptov1
ENSMUSG00000038793	MGLibB_28717	1	Lefty1
ENSMUSG00000039246	MGLibB_29865	1	Lyplal1
ENSMUSG00000039703	MGLibB_34536	1	Nploc4
ENSMUSG00000039745	MGLibA_25094	1	Htatip2
ENSMUSG00000039987	MGLibB_40782	1	Phtf2
ENSMUSG00000040649	MGLibB_45578	1	Rimklb
ENSMUSG00000042606	MGLibA_24202	1	Hirip3
ENSMUSG00000042684	MGLibA_34550	1	Npl
ENSMUSG00000044770	MGLibA_47299	1	Scml4
ENSMUSG00000044854	MGLibA_00512	1	1700056E22Rik
ENSMUSG00000045045	MGLibA_29298	1	Lrfn4
ENSMUSG00000045658	MGLibA_40853	1	Pid1
ENSMUSG00000045658	MGLibB_40840	1	Pid1
ENSMUSG00000045713	MGLibA_58490	1	Vmn1r76
ENSMUSG00000046031	MGLibB_17523	1	Fam26f
ENSMUSG00000046182	MGLibB_23118	1	Gsg1l
ENSMUSG00000046317	MGLibA_06442	1	BC107364
ENSMUSG00000046532	MGLibA_05354	1	Ar
ENSMUSG00000047115	MGLibA_17489	1	Fam221a
ENSMUSG00000047821	MGLibA_55733	1	Trim16
ENSMUSG00000048154	MGLibB_27874	1	Kmt2d
ENSMUSG00000048933	MGLibA_38160	1	Olfr722
ENSMUSG00000048992	MGLibB_43184	1	Prss32
ENSMUSG00000049130	MGLibB_07555	1	C5ar1
ENSMUSG00000050538	MGLibA_06107	1	B230217C12Rik
ENSMUSG00000050613	MGLibA_36115	1	Olfr125
ENSMUSG00000050650	MGLibB_31879	1	Mrgpra1
ENSMUSG00000051900	MGLibA_02265	1	Abca16
ENSMUSG00000052303	MGLibA_31905	1	Mrgpra6
ENSMUSG00000052642	MGLibB_01318	1	4930504O13Rik
ENSMUSG00000052942	MGLibB_20106	1	Glis3
ENSMUSG00000053414	MGLibB_25148	1	Hunk
ENSMUSG00000055799	MGLibA_53146	1	Tcf7l1
ENSMUSG00000056222	MGLibB_51043	1	Spock1
ENSMUSG00000056486	MGLibB_10273	1	Chn1
ENSMUSG00000056679	MGLibB_22644	1	Gpr173
ENSMUSG00000058022	MGLibA_03307	1	Adtrp
ENSMUSG00000058267	MGLibB_32128	1	Mrps14
ENSMUSG00000058743	MGLibB_26978	1	Kcnj14
ENSMUSG00000059552	MGLibA_56033	1	Trp53
ENSMUSG00000059552	MGLibB_56014	1	Trp53
ENSMUSG00000060794	MGLibB_56312	1	Tssk5
ENSMUSG00000062961	MGLibB_08484	1	Ccdc177
ENSMUSG00000063160	MGLibA_35088	1	Numbl
ENSMUSG00000063386	MGLibA_36458	1	Olfr1387
ENSMUSG00000066152	MGLibB_49265	1	Slc31a2
ENSMUSG00000067276	MGLibA_07947	1	Capn6
ENSMUSG00000068877	MGLibA_47624	1	Selenbp2
ENSMUSG00000069053	MGLibA_56820	1	Uba1y
ENSMUSG00000070797	MGLibB_43343	1	Psg27
ENSMUSG00000071165	MGLibA_21778	1	Gm6040
ENSMUSG00000071604	MGLibA_17363	1	Fam189a2
ENSMUSG00000074059	MGLibA_18075	1	Fbxw18
ENSMUSG00000076435	MGLibA_02744	1	Acsf2
ENSMUSG00000079410	MGLibB_21231	1	Gm2897
ENSMUSG00000079477	MGLibB_44246	1	Rab7
ENSMUSG00000080990	MGLibA_35921	1	Olfr118
ENSMUSG00000087006	MGLibB_20678	1	Gm13889
ENSMUSG00000090841	MGLibB_32884	1	Myl6
ENSMUSG00000095741	MGLibA_45479	1	Rhox2f
ENSMUSG00000096209	MGLibB_37599	1	Olfr510
ENSMUSG00000096273	MGLibB_36659	1	Olfr1474
ENSMUSG00000096555	MGLibB_38672	1	Olfr944
ENSMUSG00000100689	MGLibA_52495	1	Taar7e
ENSMUSG00000108733	MGLibA_60337	1	Zdhhc8
Gm5634	MGLibB_21668	1	Gm5634
mmu-mir-101b	MGLibA_63955	1	mmu-mir-101b
mmu-mir-326	MGLibA_65558	1	mmu-mir-326
mmu-mir-344g	MGLibA_65510	1	mmu-mir-344g
mmu-mir-362	MGLibA_66072	1	mmu-mir-362
mmu-mir-369	MGLibA_62921	1	mmu-mir-369
mmu-mir-490	MGLibA_65192	1	mmu-mir-490
mmu-mir-6384	MGLibA_66104	1	mmu-mir-6384
mmu-mir-872	MGLibA_64798	1	mmu-mir-872
mmu-mir-96	MGLibA_65170	1	mmu-mir-96
mmu-mir-99a	MGLibA_63569	1	mmu-mir-99a
NonTargetingControlGuideForMouse	0608_MGLibA_67013	1	NonTargetingControlGuideForMouse
NonTargetingControlGuideForMouse	0144_MGLibA_66549	1	NonTargetingControlGuideForMouse
NonTargetingControlGuideForMouse	0144_MGLibB_61948	1	NonTargetingControlGuideForMouse
NonTargetingControlGuideForMouse	0745_MGLibA_67150	1	NonTargetingControlGuideForMouse
NonTargetingControlGuideForMouse	0114_MGLibB_61918	1	NonTargetingControlGuideForMouse
NonTargetingControlGuideForMouse	0851_MGLibA_67256	1	NonTargetingControlGuideForMouse
Ptplb	MGLibB_43705	1	Ptplb

## Sheet: FACS-3
gene	unique.id	count	name
ENSMUSG00000059552	MGLibB_56015	83057	Trp53
ENSMUSG00000075115	MGLibB_35939	80127	Olfr1200
ENSMUSG00000055553	MGLibA_28288	66319	Kxd1
ENSMUSG00000043313	MGLibB_39793	62501	Pcdhb19
ENSMUSG00000045658	MGLibB_40840	50792	Pid1
ENSMUSG00000053113	MGLibA_50507	49796	Socs3
ENSMUSG00000033902	MGLibA_30397	43577	Mapkbp1
mmu-mir-3080	MGLibA_63385	39313	mmu-mir-3080
ENSMUSG00000022414	MGLibA_52512	36654	Tab1
ENSMUSG00000092118	MGLibA_17763	35930	Fancf
ENSMUSG00000032480	MGLibA_14112	26284	Dhx30
ENSMUSG00000102976	MGLibA_60156	22570	Zc3h11a
ENSMUSG00000006218	MGLibB_17141	14003	Fam131c
ENSMUSG00000059552	MGLibA_56035	11890	Trp53
ENSMUSG00000044700	MGLibA_54535	7845	Tmem201
ENSMUSG00000055799	MGLibA_53146	6873	Tcf7l1
ENSMUSG00000028476	MGLibB_45009	6456	Reck
ENSMUSG00000024576	MGLibB_12129	5911	Csnk1a1
ENSMUSG00000087260	MGLibA_28443	4625	Lamtor5
ENSMUSG00000028991	MGLibB_32529	3954	Mtor
4933422H20Rik	MGLibA_01581	3836	4933422H20Rik
ENSMUSG00000025466	MGLibA_19071	3684	Fuom
ENSMUSG00000029564	MGLibB_01333	3365	4930519G04Rik
ENSMUSG00000094626	MGLibB_09747	3200	Cecr6
ENSMUSG00000025227	MGLibA_54461	3106	Tmem180
ENSMUSG00000026872	MGLibA_60350	3096	Zeb2
ENSMUSG00000020611	MGLibB_22161	2907	Gna13
ENSMUSG00000026812	MGLibA_56143	2873	Tsc1
ENSMUSG00000048216	MGLibA_22783	2769	Gpr85
ENSMUSG00000063234	MGLibB_22774	2682	Gpr84
ENSMUSG00000028978	MGLibB_34418	2527	Nos3
ENSMUSG00000073791	MGLibA_15588	2469	Efcab7
ENSMUSG00000054716	MGLibA_61183	2458	Zfp771
ENSMUSG00000042801	MGLibA_38265	2335	Olfr769
ENSMUSG00000038143	MGLibB_51846	2278	Stox2
ENSMUSG00000052581	MGLibA_29616	2105	Lrrtm4
ENSMUSG00000053113	MGLibA_50508	2017	Socs3
ENSMUSG00000025515	MGLibB_32594	2016	Muc2
ENSMUSG00000026638	MGLibA_26317	1693	Irf6
ENSMUSG00000045132	MGLibB_37884	1660	Olfr620
ENSMUSG00000009073	MGLibA_33838	1391	Nf2
ENSMUSG00000001419	MGLibB_30889	1376	Mef2d
ENSMUSG00000037025	MGLibB_18730	1255	Foxa2
ENSMUSG00000045871	MGLibA_49899	1115	Slitrk6
ENSMUSG00000027513	MGLibB_39929	1010	Pck1
ENSMUSG00000073802	MGLibB_09614	808	Cdkn2b
ENSMUSG00000079698	MGLibA_58898	788	Vmn2r93
ENSMUSG00000039323	MGLibA_25569	738	Igfbp2
ENSMUSG00000037225	MGLibA_18338	624	Fgf2
ENSMUSG00000026934	MGLibB_28883	519	Lhx3
ENSMUSG00000027977	MGLibA_33511	250	Ndst3
ENSMUSG00000031809	MGLibA_00349	245	1700018B08Rik
ENSMUSG00000074059	MGLibA_18075	236	Fbxw18
ENSMUSG00000053113	MGLibB_50492	212	Socs3
ENSMUSG00000042363	MGLibB_28819	184	Lgalsl
ENSMUSG00000009073	MGLibA_33840	164	Nf2
ENSMUSG00000035900	MGLibB_22885	152	Gramd4
ENSMUSG00000057230	MGLibB_02208	144	Aak1
ENSMUSG00000021944	MGLibB_19509	140	Gata4
ENSMUSG00000046182	MGLibB_23118	126	Gsg1l
ENSMUSG00000046079	MGLibA_29555	107	Lrrc8d
ENSMUSG00000027810	MGLibA_15774	103	Eif2a
ENSMUSG00000022235	MGLibB_10941	102	Cmbl
ENSMUSG00000033998	MGLibB_27029	102	Kcnk1
ENSMUSG00000004460	MGLibA_14458	101	Dnajb11
ENSMUSG00000017057	MGLibB_25710	94	Il13ra1
ENSMUSG00000037703	MGLibB_29932	94	Lzts3
ENSMUSG00000059772	MGLibA_49928	94	Slx1b
ENSMUSG00000094011	MGLibA_58546	88	Vmn1r94
ENSMUSG00000028952	MGLibA_60103	86	Zbtb48
ENSMUSG00000070883	MGLibA_08473	81	Ccdc173
ENSMUSG00000059552	MGLibA_56033	80	Trp53
ENSMUSG00000045045	MGLibA_29298	79	Lrfn4
ENSMUSG00000055745	MGLibA_28709	79	Ldoc1l
ENSMUSG00000034792	MGLibB_22168	78	Gna15
ENSMUSG00000037279	MGLibA_39157	78	Ovol2
ENSMUSG00000035498	MGLibB_09407	76	Cdcp1
ENSMUSG00000036907	MGLibB_07446	76	C1ql2
ENSMUSG00000041423	MGLibA_39487	76	Paqr6
ENSMUSG00000075212	MGLibB_36769	76	Olfr154
Gpr52	MGLibB_22730	75	Gpr52
ENSMUSG00000010517	MGLibA_17003	74	Faf1
ENSMUSG00000027254	MGLibA_30205	74	Map1a
ENSMUSG00000030842	MGLibA_28429	74	Lamtor1
ENSMUSG00000047766	MGLibB_29477	74	Lrrc49
ENSMUSG00000055210	MGLibA_18758	74	Foxd2
ENSMUSG00000109813	MGLibB_36161	74	Olfr1279
ENSMUSG00000020124	MGLibB_57497	73	Usp15
ENSMUSG00000045767	MGLibB_06109	73	B230219D22Rik
ENSMUSG00000052102	MGLibA_22289	73	Gnpda1
ENSMUSG00000060245	MGLibB_58260	73	Vmn1r228
ENSMUSG00000021096	MGLibA_42218	72	Ppm1a
ENSMUSG00000024082	MGLibB_33571	72	Ndufaf7
ENSMUSG00000024409	MGLibB_43507	72	Psors1c2
ENSMUSG00000032186	MGLibB_54933	72	Tmod2
mmu-mir-326	MGLibA_65558	72	mmu-mir-326
ENSMUSG00000030704	MGLibA_44248	71	Rab6a
ENSMUSG00000094973	MGLibA_22053	71	Gm8994
ENSMUSG00000027246	MGLibB_15958	70	Ell3
ENSMUSG00000029452	MGLibA_54264	70	Tmem116
ENSMUSG00000030994	MGLibA_13178	70	D7Ertd443e
ENSMUSG00000041907	MGLibB_22721	70	Gpr45
ENSMUSG00000028600	MGLibB_41763	68	Podn
ENSMUSG00000044148	MGLibB_00634	67	1810030O07Rik
ENSMUSG00000043388	MGLibA_54305	66	Tmem130
ENSMUSG00000045730	MGLibB_03283	66	Adrb2
2310002J15Rik	MGLibA_00760	65	2310002J15Rik
ENSMUSG00000060807	MGLibA_47853	65	Serpina6
ENSMUSG00000072623	MGLibA_61458	65	Zfp9
ENSMUSG00000086624	MGLibA_20956	65	Gm16130
ENSMUSG00000031520	MGLibB_57833	64	Vegfc
ENSMUSG00000086624	MGLibB_20951	64	Gm16130
ENSMUSG00000030423	MGLibA_41998	63	Pop4
ENSMUSG00000032633	MGLibA_18544	63	Flcn
ENSMUSG00000022208	MGLibA_26720	62	Jph4
ENSMUSG00000026799	MGLibB_30848	62	Med27
ENSMUSG00000031904	MGLibB_49718	62	Slc7a6
ENSMUSG00000071562	MGLibA_51734	62	Stfa1
ENSMUSG00000029436	MGLibB_31539	61	Mmp17
ENSMUSG00000091405	MGLibA_24394	61	Hist2h4
mmu-mir-6362	MGLibA_63518	61	mmu-mir-6362
ENSMUSG00000004947	MGLibA_15014	60	Dtx2
ENSMUSG00000015627	MGLibB_19512	60	Gata5
ENSMUSG00000044292	MGLibA_38758	60	Olfr978
ENSMUSG00000051361	MGLibA_01704	60	6030498E09Rik
ENSMUSG00000060332	MGLibB_54123	60	Tmc2
ENSMUSG00000036985	MGLibB_60321	59	Zdhhc9
ENSMUSG00000053110	MGLibA_59856	59	Yap1
ENSMUSG00000060301	MGLibB_00913	59	2610008E11Rik
ENSMUSG00000027429	MGLibB_47542	58	Sec23b
ENSMUSG00000054008	MGLibB_33495	58	Ndst1
ENSMUSG00000068732	MGLibB_54391	58	Tmem167b
mmu-mir-7674	MGLibA_64319	58	mmu-mir-7674
ENSMUSG00000028341	MGLibA_34702	57	Nr4a3
ENSMUSG00000036957	MGLibA_29293	57	Lrfn3
ENSMUSG00000073680	MGLibA_54894	57	Tmem88b
ENSMUSG00000033732	MGLibB_48060	56	Sf3b3
ENSMUSG00000022679	MGLibB_31832	55	Mpv17l
ENSMUSG00000066515	MGLibB_27718	55	Klk1b3
ENSMUSG00000090799	MGLibA_27637	55	Klhl33
ENSMUSG00000003070	MGLibB_15612	54	Efna2
ENSMUSG00000006932	MGLibA_12332	54	Ctnnb1
ENSMUSG00000024519	MGLibB_11694	54	Cplx4
ENSMUSG00000058975	MGLibA_26889	54	Kcnc1
ENSMUSG00000092417	MGLibB_22409	54	Gpank1
ENSMUSG00000003235	MGLibA_15789	53	Eif2b5
ENSMUSG00000025314	MGLibA_43803	53	Ptprj
ENSMUSG00000032902	MGLibA_48800	53	Slc16a1
ENSMUSG00000052776	MGLibA_35265	53	Oas1a
ENSMUSG00000053110	MGLibA_59855	53	Yap1
ENSMUSG00000054027	MGLibB_34891	53	Nt5dc3
ENSMUSG00000079699	MGLibB_21833	53	Gm6592
ENSMUSG00000028062	MGLibA_28433	52	Lamtor2
ENSMUSG00000031365	MGLibA_60552	52	Zfp275
ENSMUSG00000062170	MGLibB_18631	52	Fmr1nb
ENSMUSG00000069707	MGLibB_52461	52	Taar4
ENSMUSG00000031731	MGLibA_04485	51	Ap1g1
ENSMUSG00000022971	MGLibB_25444	50	Ifnar2
ENSMUSG00000034278	MGLibB_14511	50	Dnajc17
ENSMUSG00000038997	MGLibB_05394	50	Asb17
ENSMUSG00000040610	MGLibA_54067	50	Tlx3
ENSMUSG00000051730	MGLibB_31053	50	Mettl5
ENSMUSG00000015745	MGLibA_41483	49	Plekho1
ENSMUSG00000017390	MGLibA_03816	49	Aldoc
ENSMUSG00000036813	MGLibA_16249	49	Entpd8
ENSMUSG00000044337	MGLibA_02629	49	Ackr3
ENSMUSG00000049555	MGLibB_54920	49	Tmie
ENSMUSG00000024019	MGLibA_11005	48	Cmtr1
ENSMUSG00000024730	MGLibB_32262	48	Ms4a8a
ENSMUSG00000027189	MGLibA_55826	48	Trim44
ENSMUSG00000032556	MGLibB_06838	47	Bfsp2
ENSMUSG00000063240	MGLibA_36335	47	Olfr133
ENSMUSG00000070810	MGLibA_52065	47	Sult2a6
mmu-mir-208b	MGLibA_63160	47	mmu-mir-208b
mmu-mir-6981	MGLibA_63799	47	mmu-mir-6981
ENSMUSG00000015656	MGLibB_25039	46	Hspa8
ENSMUSG00000025102	MGLibA_01054	46	3110040N11Rik
ENSMUSG00000025359	MGLibB_41621	46	Pmel
ENSMUSG00000027368	MGLibA_15104	46	Dusp2
ENSMUSG00000029722	MGLibB_03394	46	Agfg2
ENSMUSG00000049940	MGLibA_40618	46	Pgrmc2
ENSMUSG00000070372	MGLibB_07979	46	Capza1
ENSMUSG00000007815	MGLibB_45387	45	Rhoa
ENSMUSG00000020258	MGLibB_20216	45	Glyctk
ENSMUSG00000020481	MGLibA_04283	45	Ankrd36
ENSMUSG00000030008	MGLibB_42499	45	Pradc1
ENSMUSG00000030443	MGLibA_60931	45	Zfp583
ENSMUSG00000035104	MGLibB_16729	45	Eva1a
mmu-mir-296	MGLibA_64510	45	mmu-mir-296
ENSMUSG00000031987	MGLibA_15680	44	Egln1
ENSMUSG00000032621	MGLibB_51257	44	Srek1
ENSMUSG00000034891	MGLibB_50274	44	Sncb
ENSMUSG00000047531	MGLibA_46708	44	Rtp2
ENSMUSG00000050058	MGLibA_42894	44	Prm3
ENSMUSG00000023927	MGLibB_47042	43	Satb1
ENSMUSG00000024912	MGLibB_18717	43	Fosl1
ENSMUSG00000025722	MGLibB_59361	43	Wdr73
ENSMUSG00000029697	MGLibA_18253	43	Fezf1
ENSMUSG00000034324	MGLibA_54317	43	Tmem132c
ENSMUSG00000044957	MGLibB_42066	43	Pp2d1
ENSMUSG00000009406	MGLibB_15947	42	Elk1
ENSMUSG00000018820	MGLibA_61503	42	Zfyve27
ENSMUSG00000020387	MGLibA_26637	42	Jade2
ENSMUSG00000022833	MGLibA_08413	42	Ccdc14
ENSMUSG00000030213	MGLibA_05612	42	Atf7ip
ENSMUSG00000032259	MGLibA_14899	42	Drd2
ENSMUSG00000047193	MGLibB_15175	42	Dync2h1
ENSMUSG00000049130	MGLibA_07555	42	C5ar1
ENSMUSG00000054889	MGLibA_14974	42	Dsp
ENSMUSG00000061740	MGLibB_12825	42	Cyp2d22
ENSMUSG00000090935	MGLibA_52354	42	Synj2bp
Hiat1	MGLibA_24122	42	Hiat1
ENSMUSG00000015341	MGLibA_22331	41	Golga7
ENSMUSG00000016256	MGLibA_12434	41	Ctsz
ENSMUSG00000019818	MGLibA_09015	41	Cd164
ENSMUSG00000030346	MGLibB_44337	41	Rad51ap1
ENSMUSG00000052917	MGLibA_47729	41	Senp7
ENSMUSG00000059552	MGLibB_56013	41	Trp53
ENSMUSG00000001666	MGLibA_13565	40	Ddt
ENSMUSG00000003423	MGLibA_40933	40	Pih1d1
ENSMUSG00000026072	MGLibA_25802	40	Il1r1
ENSMUSG00000026207	MGLibB_50903	40	Speg
ENSMUSG00000036833	MGLibB_41732	40	Pnpla7
ENSMUSG00000046959	MGLibB_49133	40	Slc26a1
ENSMUSG00000054364	MGLibA_45412	40	Rhob
ENSMUSG00000054753	MGLibB_02132	40	AU018091
ENSMUSG00000030342	MGLibA_09276	39	Cd9
ENSMUSG00000031059	MGLibA_33587	39	Ndufb11
ENSMUSG00000032452	MGLibB_10895	39	Clstn2
ENSMUSG00000035024	MGLibB_33346	39	Ncapd3
ENSMUSG00000006301	MGLibB_54108	38	Tmbim1
ENSMUSG00000007739	MGLibA_08967	38	Cct4
ENSMUSG00000011752	MGLibA_40533	38	Pgam1
ENSMUSG00000025026	MGLibA_03179	38	Add3
ENSMUSG00000036093	MGLibA_05151	38	Arl5a
ENSMUSG00000060180	MGLibB_32825	38	Myh13
ENSMUSG00000062369	MGLibB_57505	38	Usp17lb
mmu-mir-6996	MGLibA_64275	38	mmu-mir-6996
ENSMUSG00000024592	MGLibB_07529	37	C330018D20Rik
ENSMUSG00000028247	MGLibB_11505	37	Coq3
ENSMUSG00000090751	MGLibB_58782	37	Vmn2r63
ENSMUSG00000009281	MGLibA_44562	36	Rarres2
ENSMUSG00000034107	MGLibA_04390	36	Ano7
ENSMUSG00000035378	MGLibB_48416	36	Shq1
ENSMUSG00000054746	MGLibA_02264	36	Abca15
ENSMUSG00000060487	MGLibB_46943	36	Samd5
ENSMUSG00000087006	MGLibB_20678	36	Gm13889
ENSMUSG00000096485	MGLibB_36640	36	Olfr1466
1110057K04Rik	MGLibA_00116	35	1110057K04Rik
ENSMUSG00000001855	MGLibB_35110	35	Nup214
ENSMUSG00000013367	MGLibA_25611	35	Iglon5
ENSMUSG00000015579	MGLibA_34135	35	Nkx2-5
ENSMUSG00000020702	MGLibB_08754	35	Ccl1
ENSMUSG00000021612	MGLibA_49656	35	Slc6a18
ENSMUSG00000029121	MGLibB_11949	35	Crmp1
ENSMUSG00000029192	MGLibA_52874	35	Tbc1d14
ENSMUSG00000037966	MGLibB_34014	35	Ninj1
ENSMUSG00000040680	MGLibA_27947	35	Kremen2
ENSMUSG00000095595	MGLibB_17302	35	Fam177a
ENSMUSG00000100950	MGLibA_52496	35	Taar7f
ENSMUSG00000108827	MGLibA_36258	35	Olfr1310
ENSMUSG00000003380	MGLibB_44261	34	Rabac1
ENSMUSG00000028150	MGLibA_46074	34	Rorc
ENSMUSG00000032691	MGLibA_34204	34	Nlrp3
ENSMUSG00000070407	MGLibB_24875	34	Hs3st3b1
ENSMUSG00000096169	MGLibA_21421	34	Gm4461
ENSMUSG00000026779	MGLibB_30465	33	Mastl
ENSMUSG00000029580	MGLibB_02797	33	Actb
ENSMUSG00000035239	MGLibB_33780	33	Neu3
ENSMUSG00000066803	MGLibB_58498	33	Vmn1r84
ENSMUSG00000069301	MGLibB_24235	33	Hist1h2ag
ENSMUSG00000070379	MGLibA_37357	33	Olfr402
ENSMUSG00000022125	MGLibA_10840	32	Cln5
ENSMUSG00000025366	MGLibA_16671	32	Esyt1
ENSMUSG00000025991	MGLibA_11742	32	Cps1
ENSMUSG00000030276	MGLibA_56516	32	Ttll3
ENSMUSG00000049758	MGLibB_36269	32	Olfr1318
ENSMUSG00000053293	MGLibA_41964	32	Pom121
ENSMUSG00000098754	MGLibA_42927	32	Prn
mmu-mir-666	MGLibA_62831	32	mmu-mir-666
ENSMUSG00000006270	MGLibB_57790	31	Vax1
ENSMUSG00000019467	MGLibB_05024	31	Arhgef25
ENSMUSG00000019929	MGLibA_13430	31	Dcn
ENSMUSG00000026966	MGLibA_51451	31	Ssna1
ENSMUSG00000028634	MGLibA_24416	31	Hivep3
ENSMUSG00000028940	MGLibA_24035	31	Hes2
ENSMUSG00000031438	MGLibB_45790	31	Rnf128
ENSMUSG00000034614	MGLibA_40970	31	Pik3ip1
ENSMUSG00000036376	MGLibB_02503	31	Abt1
ENSMUSG00000037347	MGLibB_10407	31	Chst7
ENSMUSG00000038406	MGLibB_47100	31	Scaf1
ENSMUSG00000094822	MGLibA_36994	31	Olfr243
BC030307	MGLibA_06306	30	BC030307
ENSMUSG00000011632	MGLibB_41012	30	Pinlyp
ENSMUSG00000023914	MGLibA_30957	30	Mep1a
ENSMUSG00000024387	MGLibB_12153	30	Csnk2b
ENSMUSG00000025464	MGLibB_39429	30	Paox
ENSMUSG00000029725	MGLibB_42331	30	Ppp1r35
ENSMUSG00000038279	MGLibA_34407	30	Nop2
ENSMUSG00000038425	MGLibA_41851	30	Poli
ENSMUSG00000054905	MGLibA_51744	30	Stfa3
ENSMUSG00000068696	MGLibB_22783	30	Gpr88
Mettl7a2Higd1c	MGLibB_31060	30	Mettl7a2Higd1c
Clca5	MGLibB_10569	29	Clca5
ENSMUSG00000015806	MGLibA_44009	29	Qdpr
ENSMUSG00000016534	MGLibB_28411	29	Lamp2
ENSMUSG00000032531	MGLibB_04029	29	Amotl2
ENSMUSG00000035126	MGLibA_59397	29	Wdr78
ENSMUSG00000035248	MGLibB_60232	29	Zcchc6
ENSMUSG00000036591	MGLibB_04915	29	Arhgap21
ENSMUSG00000037795	MGLibB_33073	29	N4bp2
ENSMUSG00000038352	MGLibB_05159	29	Arl5c
ENSMUSG00000040269	MGLibB_32172	29	Mrps28
ENSMUSG00000047462	MGLibB_01977	29	A530099J19Rik
ENSMUSG00000048994	MGLibB_01387	29	4930557A04Rik
ENSMUSG00000053333	MGLibA_14202	29	Dis3l2
ENSMUSG00000079598	MGLibA_10733	29	Clec2l
mmu-mir-6973a	MGLibA_63701	29	mmu-mir-6973a
ENSMUSG00000035686	MGLibB_53767	28	Thrsp
ENSMUSG00000057667	MGLibB_06944	28	Bloc1s3
mmu-mir-99b	MGLibA_63598	28	mmu-mir-99b
ENSMUSG00000002602	MGLibA_06073	27	Axl
ENSMUSG00000020075	MGLibA_13591	27	Ddx21
ENSMUSG00000024085	MGLibA_30160	27	Man2a1
ENSMUSG00000026812	MGLibB_56123	27	Tsc1
ENSMUSG00000047777	MGLibA_40680	27	Phf13
ENSMUSG00000053654	MGLibA_28043	27	Krt42
ENSMUSG00000063954	MGLibB_24364	27	Hist2h2aa2
ENSMUSG00000066537	MGLibB_58762	27	Vmn2r57
ENSMUSG00000072188	MGLibA_20290	27	Gm10354
ENSMUSG00000024213	MGLibA_35051	26	Nudt3
ENSMUSG00000028587	MGLibB_38938	26	Orc1
ENSMUSG00000031326	MGLibB_09671	26	Cdx4
ENSMUSG00000031807	MGLibB_40562	26	Pgls
ENSMUSG00000035459	MGLibA_51619	26	Stab2
ENSMUSG00000041974	MGLibB_50951	26	Spidr
ENSMUSG00000094103	MGLibB_00496	26	1700047I17Rik2
ENSMUSG00000021697	MGLibB_13929	25	Depdc1b
ENSMUSG00000021866	MGLibA_04424	25	Anxa11
ENSMUSG00000024411	MGLibA_04793	25	Aqp4
ENSMUSG00000025742	MGLibA_43054	25	Prps2
ENSMUSG00000033685	MGLibB_57133	25	Ucp2
ENSMUSG00000042548	MGLibB_05552	25	Asxl1
ENSMUSG00000047036	MGLibA_60783	25	Zfp445
ENSMUSG00000051065	MGLibA_30519	25	Mb21d2
ENSMUSG00000079852	MGLibA_27802	25	Klra4
ENSMUSG00000094133	MGLibA_36568	25	Olfr1431
ENSMUSG00000095525	MGLibA_38434	25	Olfr834
Gm6531	MGLibA_21829	25	Gm6531
mmu-mir-686	MGLibA_63149	25	mmu-mir-686
ENSMUSG00000035845	MGLibA_03827	24	Alg12
ENSMUSG00000046841	MGLibA_10523	24	Ckap4
ENSMUSG00000049999	MGLibA_42362	24	Ppp1r3d
ENSMUSG00000058240	MGLibB_12053	24	Cryzl1
ENSMUSG00000064220	MGLibB_24360	24	Hist2h2aa1
ENSMUSG00000074437	MGLibA_13708	24	Defa-rs1
ENSMUSG00000094777	MGLibB_24253	24	Hist1h2ap
mmu-mir-24-2	MGLibA_65752	24	mmu-mir-24-2
ENSMUSG00000006389	MGLibB_31779	23	Mpl
ENSMUSG00000020821	MGLibB_27352	23	Kif1c
ENSMUSG00000028100	MGLibB_35021	23	Nudt17
ENSMUSG00000031847	MGLibA_00458	23	1700030J22Rik
ENSMUSG00000032046	MGLibB_02412	23	Abhd12
ENSMUSG00000032386	MGLibB_55913	23	Trip4
ENSMUSG00000036875	MGLibB_14390	23	Dna2
ENSMUSG00000037537	MGLibA_23533	23	H2-M11
ENSMUSG00000074928	MGLibA_28139	23	Krtap14
mmu-mir-7065	MGLibA_65653	23	mmu-mir-7065
ENSMUSG00000026687	MGLibB_03803	22	Aldh9a1
ENSMUSG00000033478	MGLibB_17218	22	Fam160b1
ENSMUSG00000044705	MGLibB_38014	22	Olfr670
ENSMUSG00000047412	MGLibA_60095	22	Zbtb44
ENSMUSG00000050323	MGLibA_33578	22	Ndufaf6
ENSMUSG00000073970	MGLibA_37724	22	Olfr555
ENSMUSG00000074746	MGLibB_40306	22	Pdzd8
ENSMUSG00000095105	MGLibB_15464	22	Edaradd
mmu-mir-6360	MGLibA_63779	22	mmu-mir-6360
NonTargetingControlGuideForMouse	0577_MGLibA_66982	22	NonTargetingControlGuideForMouse
ENSMUSG00000000282	MGLibA_31624	21	Mnt
ENSMUSG00000000731	MGLibA_03565	21	Aire
ENSMUSG00000005534	MGLibA_26130	21	Insr
ENSMUSG00000019828	MGLibB_23026	21	Grm1
ENSMUSG00000022370	MGLibA_31996	21	Mrpl13
ENSMUSG00000028277	MGLibB_56915	21	Ube2j1
ENSMUSG00000029033	MGLibB_02567	21	Acap3
ENSMUSG00000038368	MGLibB_18696	21	Focad
ENSMUSG00000040181	MGLibA_18615	21	Fmo1
ENSMUSG00000046275	MGLibB_56646	21	Tusc5
ENSMUSG00000048109	MGLibB_44752	21	Rbm15
ENSMUSG00000049191	MGLibB_45245	21	Rgag4
ENSMUSG00000056270	MGLibB_43103	21	Prr9
ENSMUSG00000067455	MGLibA_24357	21	Hist1h4j
ENSMUSG00000093550	MGLibB_24149	21	Higd1c
ENSMUSG00000094103	MGLibB_00497	21	1700047I17Rik2
AI836003	MGLibA_02106	20	AI836003
ENSMUSG00000002504	MGLibA_49766	20	Slc9a3r2
ENSMUSG00000020458	MGLibA_46702	20	Rtn4
ENSMUSG00000021790	MGLibA_15154	20	Dydc1
ENSMUSG00000022185	MGLibB_02622	20	Acin1
ENSMUSG00000029621	MGLibB_05247	20	Arpc1a
ENSMUSG00000029826	MGLibB_60183	20	Zc3hav1
ENSMUSG00000031990	MGLibA_26673	20	Jam3
ENSMUSG00000032921	MGLibA_35400	20	Odf4
ENSMUSG00000035582	MGLibA_19743	20	Gdpd4
ENSMUSG00000036353	MGLibA_39223	20	P2ry12
ENSMUSG00000039774	MGLibA_19370	20	Galnt12
ENSMUSG00000058022	MGLibA_03307	20	Adtrp
ENSMUSG00000060679	MGLibB_32204	20	Mrps9
ENSMUSG00000090949	MGLibA_58845	20	Vmn2r77
ENSMUSG00000091780	MGLibA_47358	20	Sco2
Heatr2	MGLibB_23920	20	Heatr2
ENSMUSG00000004356	MGLibA_57694	19	Utp20
ENSMUSG00000020907	MGLibA_44972	19	Rcvrn
ENSMUSG00000021978	MGLibB_16867	19	Extl3
ENSMUSG00000023009	MGLibA_33408	19	Nckap5l
ENSMUSG00000025337	MGLibA_47069	19	Sbds
ENSMUSG00000028715	MGLibA_12931	19	Cyp4a14
ENSMUSG00000039197	MGLibA_03217	19	Adk
ENSMUSG00000040653	MGLibA_42295	19	Ppp1r14c
ENSMUSG00000048307	MGLibB_04303	19	Ankrd46
ENSMUSG00000073294	MGLibB_02147	19	AU022751
ENSMUSG00000073924	MGLibA_37985	19	Olfr656
ENSMUSG00000006476	MGLibB_34846	18	Nsmf
ENSMUSG00000006641	MGLibB_49612	18	Slc5a6
ENSMUSG00000018166	MGLibB_16438	18	Erbb3
ENSMUSG00000024815	MGLibB_56050	18	Trpd52l3
ENSMUSG00000027286	MGLibB_29502	18	Lrrc57
ENSMUSG00000032661	MGLibA_35292	18	Oas3
ENSMUSG00000038725	MGLibB_41146	18	Pkhd1l1
ENSMUSG00000041710	MGLibB_56042	18	Trpc5
ENSMUSG00000051124	MGLibB_19926	18	Gimap9
ENSMUSG00000066363	MGLibB_47813	18	Serpina3f
ENSMUSG00000069917	MGLibB_23761	18	Hba-a2
ENSMUSG00000100937	MGLibB_00382	18	1700020D05Rik
ENSMUSG00000106919	MGLibB_21516	18	Gm4981
NonTargetingControlGuideForMouse	0577_MGLibB_62381	18	NonTargetingControlGuideForMouse
ENSMUSG00000011486	MGLibA_49105	17	Slc25a41
ENSMUSG00000028173	MGLibA_59559	17	Wls
ENSMUSG00000038500	MGLibB_43089	17	Prr3
ENSMUSG00000042228	MGLibA_29839	17	Lyn
ENSMUSG00000044897	MGLibA_38401	17	Olfr821
ENSMUSG00000057116	MGLibB_02055	17	AF366264
ENSMUSG00000070695	MGLibB_11193	17	Cntnap5a
ENSMUSG00000071054	MGLibB_46900	17	Safb
ENSMUSG00000072952	MGLibB_21723	17	Gm5878
ENSMUSG00000075174	MGLibA_35662	17	Olfr1087
ENSMUSG00000001062	MGLibB_59023	16	Vps9d1
ENSMUSG00000003378	MGLibA_22979	16	Grik5
ENSMUSG00000021079	MGLibA_53912	16	Timm9
ENSMUSG00000022706	MGLibA_32074	16	Mrpl40
ENSMUSG00000026919	MGLibA_28635	16	Lcn4
ENSMUSG00000039785	MGLibB_13857	16	Defb5
ENSMUSG00000041309	MGLibA_34154	16	Nkx6-2
ENSMUSG00000041468	MGLibB_22564	16	Gpr12
ENSMUSG00000053846	MGLibB_29011	16	Lipg
ENSMUSG00000084135	MGLibA_41957	16	Pom121l12
ENSMUSG00000095595	MGLibB_17303	16	Fam177a
Klra18	MGLibA_27776	16	Klra18
Klra33	MGLibA_27796	16	Klra33
C1s	MGLibB_07488	15	C1s
ENSMUSG00000005107	MGLibA_49246	15	Slc2a9
ENSMUSG00000005362	MGLibA_11829	15	Crbn
ENSMUSG00000025610	MGLibA_30283	15	Map3k7cl
ENSMUSG00000030351	MGLibA_56222	15	Tspan11
ENSMUSG00000036960	MGLibA_10561	15	Clca2
ENSMUSG00000045636	MGLibA_32574	15	Mtus1
ENSMUSG00000050685	MGLibA_08578	15	Ccdc54
ENSMUSG00000057143	MGLibB_55702	15	Trim12c
ENSMUSG00000059910	MGLibB_36124	15	Olfr1265
ENSMUSG00000063108	MGLibB_60526	15	Zfp26
ENSMUSG00000063975	MGLibA_49807	15	Slco1a5
ENSMUSG00000066036	MGLibA_57068	15	Ubr4
ENSMUSG00000090629	MGLibA_36851	15	Olfr180
ENSMUSG00000106921	MGLibA_65334	15	mmu-mir-292b
Heatr2	MGLibA_23926	15	Heatr2
Lrdd	MGLibB_29276	15	Lrdd
1110058L19Rik	MGLibB_00118	14	1110058L19Rik
ENSMUSG00000002668	MGLibA_13895	14	Dennd1c
ENSMUSG00000015889	MGLibA_29693	14	Lta4h
ENSMUSG00000016087	MGLibA_18552	14	Fli1
ENSMUSG00000020752	MGLibB_45014	14	Recql5
ENSMUSG00000021431	MGLibA_50335	14	Snrnp48
ENSMUSG00000022580	MGLibA_45544	14	Rhpn1
ENSMUSG00000023923	MGLibA_52933	14	Tbc1d5
ENSMUSG00000026830	MGLibA_16539	14	Ermn
ENSMUSG00000027466	MGLibB_44707	14	Rbck1
ENSMUSG00000032360	MGLibB_23834	14	Hcrtr2
ENSMUSG00000034892	MGLibB_46401	14	Rps29
ENSMUSG00000039114	MGLibB_34777	14	Nrn1
ENSMUSG00000047995	MGLibA_13016	14	Cypt4
mmu-mir-3078	MGLibA_63201	14	mmu-mir-3078
Cypt10	MGLibA_12995	13	Cypt10
ENSMUSG00000002059	MGLibA_44173	13	Rab34
ENSMUSG00000015143	MGLibB_02831	13	Actn1
ENSMUSG00000018604	MGLibB_53020	13	Tbx3
ENSMUSG00000027099	MGLibB_32572	13	Mtx2
ENSMUSG00000039298	MGLibB_09556	13	Cdk5rap2
ENSMUSG00000039715	MGLibB_59268	13	Wdr34
ENSMUSG00000043991	MGLibB_43863	13	Pura
ENSMUSG00000053646	MGLibA_41607	13	Plxnb1
ENSMUSG00000094818	MGLibB_20912	13	Gm15308
ENSMUSG00000095300	MGLibB_22054	13	Gm906
NonTargetingControlGuideForMouse	0084_MGLibA_66489	13	NonTargetingControlGuideForMouse
ENSMUSG00000004264	MGLibB_40632	12	Phb2
ENSMUSG00000010435	MGLibB_50695	12	Spaca7
ENSMUSG00000021081	MGLibA_47816	12	Serpina1f
ENSMUSG00000028271	MGLibB_23236	12	Gtf2b
ENSMUSG00000031342	MGLibA_22512	12	Gpm6b
ENSMUSG00000031734	MGLibA_26363	12	Irx3
ENSMUSG00000032172	MGLibB_35445	12	Olfm2
ENSMUSG00000035946	MGLibB_23221	12	Gsx2
ENSMUSG00000066392	MGLibA_34817	12	Nrxn3
ENSMUSG00000069833	MGLibB_03503	12	Ahnak
ENSMUSG00000087075	MGLibA_01923	12	A230065H16Rik
ENSMUSG00000094362	MGLibB_21151	12	Gm21002
mmu-mir-6409	MGLibA_62110	12	mmu-mir-6409
NonTargetingControlGuideForMouse	0440_MGLibB_62244	12	NonTargetingControlGuideForMouse
NonTargetingControlGuideForMouse	0084_MGLibB_61888	12	NonTargetingControlGuideForMouse
Cypt9	MGLibA_13025	11	Cypt9
ENSMUSG00000002957	MGLibA_04510	11	Ap2a2
ENSMUSG00000025576	MGLibA_44731	11	Rbfox3
ENSMUSG00000025766	MGLibB_13129	11	D3Ertd751e
ENSMUSG00000026622	MGLibB_33709	11	Nek2
ENSMUSG00000027612	MGLibB_31559	11	Mmp24
ENSMUSG00000028457	MGLibA_05946	11	Atp8b5
ENSMUSG00000029465	MGLibA_05258	11	Arpc3
ENSMUSG00000029816	MGLibA_22522	11	Gpnmb
ENSMUSG00000033233	MGLibA_55829	11	Trim45
ENSMUSG00000037139	MGLibB_33006	11	Myom3
ENSMUSG00000044296	MGLibB_61309	11	Zfp879
ENSMUSG00000053111	MGLibB_17770	11	Fank1
ENSMUSG00000070335	MGLibA_28258	11	Krtap9-1
ENSMUSG00000071169	MGLibB_13842	11	Defb46
ENSMUSG00000079038	MGLibB_13075	11	D130040H23Rik
mmu-mir-292	MGLibA_65330	11	mmu-mir-292
NonTargetingControlGuideForMouse	0792_MGLibA_67197	11	NonTargetingControlGuideForMouse
ENSMUSG00000025995	MGLibB_59367	10	Wdr75
ENSMUSG00000027510	MGLibB_44794	10	Rbm38
ENSMUSG00000028172	MGLibB_52531	10	Tacr3
ENSMUSG00000031150	MGLibA_08342	10	Ccdc120
ENSMUSG00000040220	MGLibB_19496	10	Gas8
ENSMUSG00000049321	MGLibA_60592	10	Zfp2
ENSMUSG00000052217	MGLibB_23771	10	Hbb-bh1
ENSMUSG00000094918	MGLibB_22023	10	Gm8765
mmu-mir-3073a	MGLibA_62936	10	mmu-mir-3073a
ENSMUSG00000006724	MGLibB_12738	9	Cyp27b1
ENSMUSG00000014554	MGLibA_14040	9	Dguok
ENSMUSG00000016552	MGLibA_18866	9	Foxred2
ENSMUSG00000034135	MGLibB_48483	9	Sik3
ENSMUSG00000038271	MGLibA_25333	9	Iffo1
ENSMUSG00000039068	MGLibB_61798	9	Zzz3
ENSMUSG00000040289	MGLibB_24059	9	Hey1
ENSMUSG00000049225	MGLibB_40247	9	Pdp1
ENSMUSG00000051527	MGLibA_57570	9	Usp29
ENSMUSG00000059326	MGLibB_12078	9	Csf2ra
ENSMUSG00000071691	MGLibA_22087	9	Gm960
ENSMUSG00000074139	MGLibA_00515	9	1700057G04Rik
mmu-mir-3073b	MGLibA_62940	9	mmu-mir-3073b
mmu-mir-6396	MGLibA_65844	9	mmu-mir-6396
ENSMUSG00000020019	MGLibB_34923	8	Ntn4
ENSMUSG00000028786	MGLibA_54798	8	Tmem54
ENSMUSG00000029644	MGLibB_40278	8	Pdx1
ENSMUSG00000034684	MGLibA_47671	8	Sema3f
ENSMUSG00000037210	MGLibB_17366	8	Fam193a
ENSMUSG00000037260	MGLibB_24087	8	Hgsnat
ENSMUSG00000058388	MGLibB_40778	8	Phtf1
ENSMUSG00000069919	MGLibB_23758	8	Hba-a1
ENSMUSG00000095066	MGLibB_13715	8	Defa20
ENSMUSG00000022781	MGLibB_39358	7	Pak2
ENSMUSG00000025178	MGLibB_40806	7	Pi4k2a
ENSMUSG00000028034	MGLibB_19041	7	Fubp1
ENSMUSG00000030549	MGLibB_45375	7	Rhcg
ENSMUSG00000031627	MGLibA_26307	7	Irf2
ENSMUSG00000032719	MGLibA_47102	7	Sbspon
ENSMUSG00000050217	MGLibA_28856	7	Lgsn
ENSMUSG00000063251	MGLibB_28203	7	Krtap4-1
ENSMUSG00000063455	MGLibB_13162	7	D630045J12Rik
ENSMUSG00000073877	MGLibA_20659	7	Gm13306
ENSMUSG00000079037	MGLibA_42922	7	Prnp
ENSMUSG00000089727	MGLibA_27814	7	Klra8
ENSMUSG00000091297	MGLibB_21992	7	Gm8439
ENSMUSG00000091625	MGLibA_29662	7	Lsm5
ENSMUSG00000096295	MGLibB_13736	7	Defa2
NonTargetingControlGuideForMouse	0792_MGLibB_62596	7	NonTargetingControlGuideForMouse
NonTargetingControlGuideForMouse	0064_MGLibA_66469	7	NonTargetingControlGuideForMouse
ENSMUSG00000004359	MGLibA_50963	6	Spic
ENSMUSG00000019809	MGLibB_40449	6	Pex3
ENSMUSG00000020766	MGLibB_19345	6	Galk1
ENSMUSG00000022562	MGLibB_38891	6	Oplah
ENSMUSG00000024647	MGLibB_08210	6	Cbln2
ENSMUSG00000030050	MGLibA_20044	6	Gkn1
ENSMUSG00000035427	MGLibB_30049	6	Mageb4
ENSMUSG00000044294	MGLibB_28088	6	Krt84
ENSMUSG00000057614	MGLibA_22179	6	Gnai1
ENSMUSG00000057778	MGLibA_12635	6	Cyb5d2
ENSMUSG00000059382	MGLibA_52777	6	Tas2r120
ENSMUSG00000067399	MGLibA_55823	6	Trim43c
ENSMUSG00000079293	MGLibB_10775	6	Clec7a
ENSMUSG00000096527	MGLibB_21798	6	Gm6370
ENSMUSG00000099711	MGLibA_21214	6	Gm21951
ENSMUSG00000100601	MGLibA_36068	6	Olfr1245
Klra21	MGLibA_27784	6	Klra21
Ccdc132	MGLibA_08372	5	Ccdc132
ENSMUSG00000005716	MGLibB_43892	5	Pvalb
ENSMUSG00000031207	MGLibB_32328	5	Msn
ENSMUSG00000050030	MGLibA_38178	5	Olfr728
ENSMUSG00000050860	MGLibB_40759	5	Phospho1
ENSMUSG00000061887	MGLibA_51422	5	Ssbp3
ENSMUSG00000062757	MGLibB_35953	5	Olfr1206
ENSMUSG00000064246	MGLibB_10212	5	Chil1
ENSMUSG00000068263	MGLibA_15592	5	Efcc1
ENSMUSG00000073917	MGLibB_37995	5	Olfr665
ENSMUSG00000079162	MGLibA_55822	5	Trim43b
ENSMUSG00000093764	MGLibB_58337	5	Vmn1r36
ENSMUSG00000094876	MGLibA_20728	5	Gm14345
ENSMUSG00000095814	MGLibA_20740	5	Gm14374
ENSMUSG00000100249	MGLibB_21205	5	Gm21950
mmu-mir-302b	MGLibA_64671	5	mmu-mir-302b
NonTargetingControlGuideForMouse	0295_MGLibA_66700	5	NonTargetingControlGuideForMouse
ENSMUSG00000020661	MGLibA_14635	4	Dnmt3a
ENSMUSG00000021796	MGLibB_07009	4	Bmpr1a
ENSMUSG00000021799	MGLibA_38912	4	Opn4
ENSMUSG00000030051	MGLibA_04630	4	Aplf
ENSMUSG00000036990	MGLibA_39123	4	Otud4
ENSMUSG00000038085	MGLibB_11012	4	Cnbd2
ENSMUSG00000038791	MGLibB_47258	4	Scgb3a2
ENSMUSG00000040396	MGLibA_02417	4	Abhd13
ENSMUSG00000048154	MGLibA_27881	4	Kmt2d
ENSMUSG00000049018	MGLibA_37277	4	Olfr368
ENSMUSG00000056586	MGLibA_59997	4	Zar1l
ENSMUSG00000073599	MGLibB_15448	4	Ecscr
ENSMUSG00000094727	MGLibA_21232	4	Gm2825
ENSMUSG00000094876	MGLibA_20730	4	Gm14345
ENSMUSG00000096194	MGLibA_21231	4	Gm2799
ENSMUSG00000096664	MGLibB_21286	4	Gm3409
ENSMUSG00000096813	MGLibA_57995	4	Vmn1r126
NonTargetingControlGuideForMouse	0440_MGLibA_66845	4	NonTargetingControlGuideForMouse
NonTargetingControlGuideForMouse	0064_MGLibB_61868	4	NonTargetingControlGuideForMouse
NonTargetingControlGuideForMouse	0295_MGLibB_62099	4	NonTargetingControlGuideForMouse
4922501L14Rik	MGLibB_01179	3	4922501L14Rik
ENSMUSG00000021221	MGLibB_14766	3	Dpf3
ENSMUSG00000023147	MGLibA_59636	3	Wrb
ENSMUSG00000024298	MGLibB_61292	3	Zfp871
ENSMUSG00000025489	MGLibA_25400	3	Ifitm5
ENSMUSG00000026159	MGLibA_03390	3	Agfg1
ENSMUSG00000030324	MGLibA_45540	3	Rho
ENSMUSG00000038151	MGLibA_42594	3	Prdm1
ENSMUSG00000042254	MGLibB_10473	3	Cilp
ENSMUSG00000045835	MGLibB_23888	3	Hdgfl1
ENSMUSG00000047343	MGLibB_31025	3	Mettl21c
ENSMUSG00000050199	MGLibA_28848	3	Lgr4
ENSMUSG00000050963	MGLibB_27101	3	Kcns2
ENSMUSG00000057612	MGLibB_58341	3	Vmn1r37
ENSMUSG00000058275	MGLibA_37372	3	Olfr412
ENSMUSG00000071379	MGLibB_24765	3	Hpcal1
ENSMUSG00000078324	MGLibA_21249	3	Gm2933
ENSMUSG00000079091	MGLibB_21281	3	Gm3404
ENSMUSG00000079093	MGLibB_01268	3	4930449I24Rik
ENSMUSG00000093828	MGLibB_08780	3	Ccl27a
ENSMUSG00000094273	MGLibA_20365	3	Gm10922
ENSMUSG00000094307	MGLibA_20734	3	Gm14347
ENSMUSG00000094309	MGLibA_22115	3	Gmcl1l
ENSMUSG00000094596	MGLibA_20363	3	Gm10921
ENSMUSG00000096513	MGLibA_21371	3	Gm4175
Gpr64	MGLibB_22749	3	Gpr64
mmu-mir-744	MGLibA_62363	3	mmu-mir-744
NonTargetingControlGuideForMouse	0416_MGLibA_66821	3	NonTargetingControlGuideForMouse
ENSMUSG00000014686	MGLibB_09696	2	Ceacam16
ENSMUSG00000015176	MGLibA_34386	2	Nolc1
ENSMUSG00000020196	MGLibB_07618	2	Cabin1
ENSMUSG00000021481	MGLibB_60622	2	Zfp346
ENSMUSG00000023050	MGLibA_30250	2	Map3k12
ENSMUSG00000030859	MGLibA_17519	2	Fam24a
ENSMUSG00000032812	MGLibA_04816	2	Arap1
ENSMUSG00000035095	MGLibB_17247	2	Fam167a
ENSMUSG00000040848	MGLibB_48108	2	Sft2d2
ENSMUSG00000041505	MGLibB_21278	2	Gm3402
ENSMUSG00000043621	MGLibB_57070	2	Ubxn10
ENSMUSG00000048807	MGLibA_49350	2	Slc35e4
ENSMUSG00000065979	MGLibA_11736	2	Cpped1
ENSMUSG00000068814	MGLibB_35805	2	Olfr1145
ENSMUSG00000072770	MGLibB_02728	2	Acrbp
ENSMUSG00000078213	MGLibA_21337	2	Gm3750
ENSMUSG00000092243	MGLibB_21882	2	Gm7030
ENSMUSG00000094085	MGLibA_57956	2	Vmn1r114
ENSMUSG00000094307	MGLibA_20736	2	Gm14347
ENSMUSG00000094558	MGLibA_20732	2	Gm14346
ENSMUSG00000094680	MGLibA_57981	2	Vmn1r121
ENSMUSG00000094860	MGLibA_21342	2	Gm3763
ENSMUSG00000095557	MGLibB_21287	2	Gm3415
ENSMUSG00000095716	MGLibA_20738	2	Gm14351
ENSMUSG00000096152	MGLibB_20975	2	Gm16442
ENSMUSG00000096194	MGLibB_21222	2	Gm2799
ENSMUSG00000101500	MGLibA_21236	2	Gm2863
mmu-mir-330	MGLibA_65368	2	mmu-mir-330
NonTargetingControlGuideForMouse	0679_MGLibA_67084	2	NonTargetingControlGuideForMouse
NonTargetingControlGuideForMouse	0849_MGLibB_62653	2	NonTargetingControlGuideForMouse
ENSMUSG00000004880	MGLibB_28516	1	Lbr
ENSMUSG00000021728	MGLibB_16029	1	Emb
ENSMUSG00000025486	MGLibA_48548	1	Sirt3
ENSMUSG00000025648	MGLibB_40490	1	Pfkfb4
ENSMUSG00000027544	MGLibA_33857	1	Nfatc2
ENSMUSG00000028059	MGLibB_05032	1	Arhgef2
ENSMUSG00000028161	MGLibB_42426	1	Ppp3ca
ENSMUSG00000031706	MGLibB_45213	1	Rfx1
ENSMUSG00000034430	MGLibB_61782	1	Zxdc
ENSMUSG00000039205	MGLibB_10513	1	Ciz1
ENSMUSG00000039838	MGLibA_49521	1	Slc45a1
ENSMUSG00000042997	MGLibA_33983	1	Nhlrc3
ENSMUSG00000049013	MGLibA_43245	1	Prss48
ENSMUSG00000053477	MGLibB_53127	1	Tcf4
ENSMUSG00000078213	MGLibA_21339	1	Gm3750
ENSMUSG00000079364	MGLibB_21307	1	Gm3558
ENSMUSG00000079409	MGLibB_21699	1	Gm5795
ENSMUSG00000091635	MGLibA_58636	1	Vmn2r13
ENSMUSG00000092297	MGLibA_21383	1	Gm4214
ENSMUSG00000093917	MGLibB_22004	1	Gm8660
ENSMUSG00000094273	MGLibA_20367	1	Gm10922
ENSMUSG00000094309	MGLibB_22106	1	Gmcl1l
ENSMUSG00000094558	MGLibB_20724	1	Gm14346
ENSMUSG00000094589	MGLibB_57947	1	Vmn1r118
ENSMUSG00000094596	MGLibA_20364	1	Gm10921
ENSMUSG00000094727	MGLibA_21234	1	Gm2825
ENSMUSG00000094762	MGLibA_20345	1	Gm10670
ENSMUSG00000094860	MGLibB_21333	1	Gm3763
ENSMUSG00000095061	MGLibB_15247	1	E030018B13Rik
ENSMUSG00000095064	MGLibA_58020	1	Vmn1r135
ENSMUSG00000095081	MGLibB_22014	1	Gm8693
ENSMUSG00000095814	MGLibA_20742	1	Gm14374
ENSMUSG00000096164	MGLibA_58544	1	Vmn1r93
ENSMUSG00000096348	MGLibA_20342	1	Gm10666
ENSMUSG00000096663	MGLibB_57914	1	Vmn1r103
ENSMUSG00000096871	MGLibA_20339	1	Gm10665
ENSMUSG00000101500	MGLibB_21227	1	Gm2863
NonTargetingControlGuideForMouse	0416_MGLibB_62220	1	NonTargetingControlGuideForMouse
NonTargetingControlGuideForMouse	0278_MGLibA_66683	1	NonTargetingControlGuideForMouse
NonTargetingControlGuideForMouse	0679_MGLibB_62483	1	NonTargetingControlGuideForMouse
NonTargetingControlGuideForMouse	0849_MGLibA_67254	1	NonTargetingControlGuideForMouse
NonTargetingControlGuideForMouse	0278_MGLibB_62082	1	NonTargetingControlGuideForMouse
Spdyb	MGLibB_50865	1	Spdyb

## Sheet: Puro-1
gene	unique.id	count	name
ENSMUSG00000028978	MGLibB_34418	129090	Nos3
ENSMUSG00000045132	MGLibB_37884	125379	Olfr620
ENSMUSG00000052581	MGLibA_29616	124927	Lrrtm4
ENSMUSG00000038143	MGLibB_51846	122292	Stox2
ENSMUSG00000009073	MGLibA_33838	105367	Nf2
ENSMUSG00000045871	MGLibA_49899	84250	Slitrk6
ENSMUSG00000053113	MGLibA_50508	75243	Socs3
ENSMUSG00000053113	MGLibA_50507	44234	Socs3
ENSMUSG00000079698	MGLibA_58898	44121	Vmn2r93
ENSMUSG00000043313	MGLibB_39793	31465	Pcdhb19
mmu-mir-3080	MGLibA_63385	31303	mmu-mir-3080
ENSMUSG00000006218	MGLibB_17141	28748	Fam131c
ENSMUSG00000055553	MGLibA_28288	23896	Kxd1
ENSMUSG00000033902	MGLibA_30397	19891	Mapkbp1
ENSMUSG00000053113	MGLibB_50492	16806	Socs3
ENSMUSG00000031809	MGLibA_00349	13758	1700018B08Rik
ENSMUSG00000042363	MGLibB_28819	11129	Lgalsl
ENSMUSG00000046182	MGLibB_23118	10853	Gsg1l
ENSMUSG00000027977	MGLibA_33511	9066	Ndst3
ENSMUSG00000033998	MGLibB_27029	8990	Kcnk1
ENSMUSG00000075115	MGLibB_35939	7083	Olfr1200
ENSMUSG00000022414	MGLibA_52512	6422	Tab1
ENSMUSG00000102976	MGLibA_60156	5446	Zc3h11a
ENSMUSG00000009073	MGLibA_33840	4266	Nf2
ENSMUSG00000054905	MGLibA_51744	4225	Stfa3
ENSMUSG00000057230	MGLibB_02208	4049	Aak1
ENSMUSG00000015627	MGLibB_19512	3481	Gata5
ENSMUSG00000059552	MGLibB_56015	3231	Trp53
ENSMUSG00000032480	MGLibA_14112	2988	Dhx30
mmu-mir-326	MGLibA_65558	1863	mmu-mir-326
ENSMUSG00000021096	MGLibA_42218	1143	Ppm1a
ENSMUSG00000043388	MGLibA_54305	1016	Tmem130
ENSMUSG00000041556	MGLibB_17972	1006	Fbxo2
ENSMUSG00000044897	MGLibA_38401	898	Olfr821
ENSMUSG00000045306	MGLibB_38186	516	Olfr734
ENSMUSG00000028062	MGLibA_28433	238	Lamtor2
ENSMUSG00000042380	MGLibB_50077	176	Smim12
ENSMUSG00000061702	MGLibB_54895	169	Tmem91
ENSMUSG00000092118	MGLibA_17763	168	Fancf
ENSMUSG00000033478	MGLibB_17219	51	Fam160b1
ENSMUSG00000059552	MGLibA_56035	12	Trp53
ENSMUSG00000024576	MGLibB_12129	6	Csnk1a1
ENSMUSG00000026638	MGLibA_26317	4	Irf6
ENSMUSG00000073802	MGLibB_09614	4	Cdkn2b
NonTargetingControlGuideForMouse	0268_MGLibB_62072	4	NonTargetingControlGuideForMouse
ENSMUSG00000025466	MGLibA_19071	3	Fuom
ENSMUSG00000048216	MGLibA_22783	3	Gpr85
ENSMUSG00000001419	MGLibB_30889	2	Mef2d
ENSMUSG00000015536	MGLibA_31664	2	Mocs2
ENSMUSG00000022347	MGLibB_01912	2	A1bg
ENSMUSG00000029564	MGLibB_01333	2	4930519G04Rik
ENSMUSG00000030842	MGLibB_28421	2	Lamtor1
ENSMUSG00000045780	MGLibA_37904	2	Olfr624
ENSMUSG00000048154	MGLibA_27881	2	Kmt2d
ENSMUSG00000054716	MGLibA_61183	2	Zfp771
ENSMUSG00000059382	MGLibA_52777	2	Tas2r120
ENSMUSG00000062937	MGLibA_32405	2	Mtap
ENSMUSG00000063234	MGLibB_22774	2	Gpr84
ENSMUSG00000067513	MGLibB_36569	2	Olfr1436
ENSMUSG00000079597	MGLibB_21628	2	Gm5483
ENSMUSG00000095620	MGLibB_00680	2	2010005H15Rik
NonTargetingControlGuideForMouse	0268_MGLibA_66673	2	NonTargetingControlGuideForMouse
ENSMUSG00000003402	MGLibA_42762	1	Prkcsh
ENSMUSG00000016493	MGLibA_09179	1	Cd46
ENSMUSG00000020123	MGLibB_06048	1	Avpr1a
ENSMUSG00000021994	MGLibB_59583	1	Wnt5a
ENSMUSG00000024539	MGLibA_43754	1	Ptpn2
ENSMUSG00000026812	MGLibA_56143	1	Tsc1
ENSMUSG00000028927	MGLibB_39303	1	Padi2
ENSMUSG00000030859	MGLibA_17519	1	Fam24a
ENSMUSG00000031937	MGLibA_59087	1	Vstm5
ENSMUSG00000032572	MGLibA_11365	1	Col6a4
ENSMUSG00000032977	MGLibA_17421	1	Fam207a
ENSMUSG00000034203	MGLibA_10139	1	Chchd4
ENSMUSG00000042801	MGLibA_38265	1	Olfr769
ENSMUSG00000046532	MGLibA_05354	1	Ar
ENSMUSG00000052102	MGLibA_22289	1	Gnpda1
ENSMUSG00000053375	MGLibA_05905	1	Atp6v1e2
ENSMUSG00000055436	MGLibB_51360	1	Srsf11
ENSMUSG00000056367	MGLibA_02853	1	Actr3b
ENSMUSG00000059552	MGLibB_56013	1	Trp53
ENSMUSG00000061707	MGLibA_21486	1	Gm4871
ENSMUSG00000066637	MGLibA_56426	1	Ttc32
ENSMUSG00000067150	MGLibA_59792	1	Xpo5
ENSMUSG00000067370	MGLibA_06128	1	B3galt4
ENSMUSG00000069792	MGLibB_59453	1	Wfdc17
ENSMUSG00000074378	MGLibB_07259	1	Bsph1
ENSMUSG00000102697	MGLibA_39775	1	Pcdhac2

## Sheet: Puro-2
gene	unique.id	count	name
ENSMUSG00000024576	MGLibB_12129	350145	Csnk1a1
ENSMUSG00000053113	MGLibA_50507	210092	Socs3
ENSMUSG00000042801	MGLibA_38265	169962	Olfr769
ENSMUSG00000029564	MGLibB_01333	164286	4930519G04Rik
ENSMUSG00000054716	MGLibA_61183	162270	Zfp771
ENSMUSG00000026812	MGLibA_56143	161777	Tsc1
ENSMUSG00000043313	MGLibB_39793	123989	Pcdhb19
ENSMUSG00000006218	MGLibB_17141	110771	Fam131c
mmu-mir-3080	MGLibA_63385	94913	mmu-mir-3080
ENSMUSG00000055553	MGLibA_28288	92909	Kxd1
ENSMUSG00000033902	MGLibA_30397	81055	Mapkbp1
ENSMUSG00000092118	MGLibA_17763	16251	Fancf
ENSMUSG00000059552	MGLibB_56015	7742	Trp53
ENSMUSG00000102976	MGLibA_60156	4589	Zc3h11a
ENSMUSG00000032480	MGLibA_14112	3250	Dhx30
ENSMUSG00000095061	MGLibB_15247	2072	E030018B13Rik
ENSMUSG00000048402	MGLibA_20091	2018	Gli2
ENSMUSG00000059552	MGLibA_56034	838	Trp53
ENSMUSG00000031145	MGLibB_42667	577	Prickle3
ENSMUSG00000053113	MGLibB_50492	480	Socs3
ENSMUSG00000037098	MGLibB_44073	475	Rab11fip3
NonTargetingControlGuideForMouse	0268_MGLibB_62072	177	NonTargetingControlGuideForMouse
NonTargetingControlGuideForMouse	0268_MGLibA_66673	162	NonTargetingControlGuideForMouse
ENSMUSG00000019659	MGLibA_08364	137	Ccdc12
ENSMUSG00000040511	MGLibA_43918	119	Pvr
ENSMUSG00000016493	MGLibA_09179	116	Cd46
ENSMUSG00000062190	MGLibA_28449	109	Lancl2
ENSMUSG00000074397	MGLibB_18850	94	Foxr1
ENSMUSG00000074378	MGLibB_07259	42	Bsph1
ENSMUSG00000079113	MGLibA_21964	22	Gm7861
ENSMUSG00000032572	MGLibA_11365	19	Col6a4
ENSMUSG00000037025	MGLibB_18730	18	Foxa2
ENSMUSG00000057230	MGLibB_02208	18	Aak1
ENSMUSG00000052581	MGLibA_29616	16	Lrrtm4
ENSMUSG00000079114	MGLibA_21961	15	Gm7849
ENSMUSG00000074434	MGLibA_21849	14	Gm6696
ENSMUSG00000009073	MGLibA_33840	13	Nf2
ENSMUSG00000022347	MGLibB_01912	13	A1bg
ENSMUSG00000025515	MGLibB_32594	13	Muc2
ENSMUSG00000028062	MGLibA_28433	13	Lamtor2
ENSMUSG00000038143	MGLibB_51846	13	Stox2
ENSMUSG00000059552	MGLibA_56035	13	Trp53
ENSMUSG00000082211	MGLibB_20908	13	Gm15299
ENSMUSG00000094687	MGLibA_13734	13	Defa25
ENSMUSG00000058618	MGLibB_02178	12	AY761184
ENSMUSG00000042380	MGLibB_50077	11	Smim12
ENSMUSG00000045132	MGLibB_37884	10	Olfr620
ENSMUSG00000059552	MGLibB_56013	10	Trp53
ENSMUSG00000061958	MGLibA_20859	9	Gm14851
ENSMUSG00000009073	MGLibA_33838	8	Nf2
ENSMUSG00000028978	MGLibB_34418	7	Nos3
ENSMUSG00000067150	MGLibA_59792	7	Xpo5
ENSMUSG00000053113	MGLibA_50508	6	Socs3
ENSMUSG00000063234	MGLibB_22774	6	Gpr84
ENSMUSG00000045871	MGLibA_49899	4	Slitrk6
ENSMUSG00000073802	MGLibB_09614	4	Cdkn2b
ENSMUSG00000020196	MGLibB_07618	3	Cabin1
ENSMUSG00000022414	MGLibA_52512	3	Tab1
ENSMUSG00000028106	MGLibA_46337	3	Rprd2
ENSMUSG00000036480	MGLibA_43264	3	Prss56
ENSMUSG00000048216	MGLibA_22783	3	Gpr85
ENSMUSG00000049807	MGLibB_04922	3	Arhgap23
ENSMUSG00000079698	MGLibA_58898	3	Vmn2r93
ENSMUSG00000024082	MGLibB_33571	2	Ndufaf7
ENSMUSG00000024968	MGLibA_44961	2	Rcor2
ENSMUSG00000026638	MGLibA_26317	2	Irf6
ENSMUSG00000031918	MGLibA_32514	2	Mtmr2
ENSMUSG00000042363	MGLibB_28819	2	Lgalsl
ENSMUSG00000055799	MGLibB_53129	2	Tcf7l1
ENSMUSG00000061702	MGLibB_54895	2	Tmem91
ENSMUSG00000063163	MGLibA_50890	2	Speer2
ENSMUSG00000063823	MGLibA_37667	2	Olfr532
ENSMUSG00000070448	MGLibA_58882	2	Vmn2r89
ENSMUSG00000075115	MGLibB_35939	2	Olfr1200
mmu-mir-8101	MGLibA_62544	2	mmu-mir-8101
mmu-mir-99a	MGLibA_63569	2	mmu-mir-99a
1200014J11Rik	MGLibB_00149	1	1200014J11Rik
C230052I12Rik	MGLibA_07492	1	C230052I12Rik
ENSMUSG00000001419	MGLibB_30889	1	Mef2d
ENSMUSG00000014859	MGLibB_15293	1	E2f4
ENSMUSG00000017057	MGLibB_25710	1	Il13ra1
ENSMUSG00000020123	MGLibB_06050	1	Avpr1a
ENSMUSG00000022241	MGLibA_52717	1	Tars
ENSMUSG00000025241	MGLibA_19141	1	Fyco1
ENSMUSG00000025607	MGLibB_11459	1	Copg2
ENSMUSG00000027187	MGLibB_08175	1	Cat
ENSMUSG00000028261	MGLibA_33572	1	Ndufaf4
ENSMUSG00000028476	MGLibB_45009	1	Reck
ENSMUSG00000028938	MGLibA_19413	1	Galntl5
ENSMUSG00000031809	MGLibA_00349	1	1700018B08Rik
ENSMUSG00000031861	MGLibB_29193	1	Lpar2
ENSMUSG00000032633	MGLibB_18537	1	Flcn
ENSMUSG00000044700	MGLibA_54535	1	Tmem201
ENSMUSG00000045658	MGLibB_40840	1	Pid1
ENSMUSG00000048960	MGLibB_42643	1	Prex2
ENSMUSG00000055799	MGLibA_53146	1	Tcf7l1
ENSMUSG00000060691	MGLibB_28144	1	Krtap19-1
ENSMUSG00000075197	MGLibB_35581	1	Olfr1046
ENSMUSG00000078683	MGLibA_32662	1	Mup1
ENSMUSG00000094496	MGLibB_38316	1	Olfr792
ENSMUSG00000094575	MGLibA_21099	1	Gm20738
Gm6484	MGLibB_21815	1	Gm6484
mmu-mir-5619	MGLibA_65018	1	mmu-mir-5619
