# Supplementary material for: A Genome-Wide CRISPR Screen Identifies Factors Regulating Pluripotency Exit in Mouse Embryonic Stem Cells
Source: Cells. 2022 Jul 25;11(15):2289. doi: 10.3390/cells11152289 (PMC9331787; doi:10.3390/cells11152289)
Supplement: Supplementary file 1 [file cells-11-02289-s001.zip › Table S3.xlsx]

## Sheet: Sheet1
This study	Table S1; Leeb et al., 2014	Table S2; Li et al., 2018	Table S2; MacDougall et al., 2019	Dataset EV1；Lackner et al., 2021
Z value >= 2	Genes satisfying cutoff criteria identified in 4 high throughput screens	Differentiation	id	Dataset EV1 - Combined High Confidence Candidate List	251	2
Socs3	Tcf7l1	d2	PTPN2	MULTIPLE HITS >= 5 OR (FDR < 0.01 AND MULTIPLE HITS ≥ 2)	563	6
Trp53	Mapk1	Pre-sort	RRAGC	Tcf7l1	35	5
Tsc1	Pten	GFP+	TRP53	Fgfr2	489	4
Nf2	Etv5	Positive	ATP2B1	Alg13
Csnk1a1	Rragc	563	FGFR1	Ctbp2
Zfp771	Ass1	1110037F02Rik	APC	Arfip1
Olfr769	Smarcad1	Tsc2	TSC1	Jarid2
4930519G04Rik	Akt3	Tsc1	TCF7L1	Rbpj
Fam24a	Etl4	Vps16	ZFP281	Nsd1
Pfkfb4	Clk1	Cnot8	TFE3	Arid5b
Slitrk6	Hnrnpc	Mettl14	LAMTOR4	Fbxw7
Pcdhb19	Gtf2ird1	Tcf7l1	RAB7	Msi2
Fam131c	Tpd52	Ptpn11	SPNS1	Dym
Mapkbp1	Smg6	Slc25a51	PTPN11	Etv5
Kxd1	Abl1	Ndufa2	VPS18	Mapk1
Olfr1200	Arid5b	Spns1	CSDE1	Smg7
Pid1	Kdm5b	Trp53	SPOP	Ubr5
Tab1	Brd4	Bcs1l	TSC2	Pten
Tcf7l1	Cald1	Hmbs	ARRDC3	Etl4
Dhx30	Sos1	Cnot2	NF2	Jmjd1c
Zc3h11a	Ahdc1	Smg5	FRS2	Trp53
Nos3	Zfp423	Ears2	FBXW7	Usp9x
Olfr620	1110012J17Rik	Sco2	LAMTOR2	Morc1
Stox2	Rbpj	Pde12	VPS16	Ptprg
	Mum1	Hccs	FLCN	Sulf1
	Pxn	Fam58b	OLFR478	Dst
	Zcchc2	Mettl3	DDX17	Foxp1
	Bri3	Ndufaf5	ACTBL2	Epb41l4a
	Naca	Hsd17b10	VPS29	Tet1
	Pdhx	Cars2	OTX2	Cfdp1
	Ccnd3	Rragc	RANBP3	Cdc37l1
	Usp9x	Ctbp2	VPS11	Ino80
	Pogz	Cpox	DHX29	Pitpnc1
	Nr2c2	Mrps16	SOCS3	Cradd
	Myst4	Vps18	RNF17	Apc
	Kdm5c	Mcat	SEP15	Camkmt
	Large	Coa4	ARNT	Mta3
	Abl2	Tsfm	VPS39	Zfp532
	Cep55	Fgfr1	VPS35	Ncor1
	Gfpt2	Zc3h13	HOXA1	Arih2
	Jarid2	Lamtor4	FIG4	Macf1
	Ncoa7	Aars2	MKNK2	Usp7
	Sbf2	Lamtor1	ZCCHC24	Pkp4
	Lace1	Tbrg4	TM2D2	Mthfd1l
	Kdm6a	Mecr	SSXB1	Pecam1
	Smad4	Glrx5	NALCN	Rnf220
	Sufu	Malsu1	EPC2	Zfp423
	Ubac2	Med12	EFCAB1	Zfp462
	E430025E21Rik	Adck4	CAST	Tns3
	Pax6	Rraga	VPS54	Vps41
	Jub	Rpusd4	SCIN	Nmnat2
	Lphn2	Mrpl24	AXIN1	Mllt10
	Wasf2	Dhx30	OLFR642	Schip1
	Tnks	Ndufb2	TMED8	Ap3b1
	Myo10	Atp2b1	4930415L06RIK	Ppp3ca
	Flnb	Ndufv1	INTS12	Ext1
	Gphn	Tufm	GAPDHS	Oxr1
	Rsrc1	Smarcb1	4933411K16RIK	Utrn
	Srpk1	Nars2		Aff3
	Spnb4	Psmd3		Arl15
	Anln	Cox10		Dmd
	Manba	Ptcd1		Mllt6
	E2f1	Ndufb6		Arrdc3
	Tsr1	Dhx29		Elovl6
	Lsg1	Cox4i1		Rtn4
	Phc1	Coq4		Pcbp2
	Mthfd1l	Ndufa11		Pex13
	Obfc1	Sars2		Fat1
	Zfp532	Mrps6		Ncoa1
	Trrap	Mtg2		Plekhf2
	Rcc2	Cox15		Reep3
	Tdp2	Mrpl23		Aven
	Ngrn	Ndufaf3		Irak3
	Fgfr2	Ranbp3		Bcor
	Pcmtd1	Xpo5		Sfi1
	Sf3b4	Mrpl37		Csnk1a1
	Zfp187	Eif4g2		Tmem131
	Tars2	Ndufa8		Spata13
	Cdh1	Slc35b2		Myo10
	Acsl4	Mrpl53		Enah
	Fbxo30	Wtap		Rai14
	Dym	Ddx28		Zmym4
	Mta1	Ndufa1		Kdm6a
	Naa15	Zic3		Fto
	Smyd4	Uqcrc2		Abcc4
	Srsf4	Nf2		Camk1d
	Pkp4	Usp9x		Cog5
	Ado	Pdss2		Rere
	Vac14	Mars2		Ranbp17
	Camk1d	Vps39		Dlc1
	Rfx7	Mrpl41		Exoc4
	Nav2	Ext2		Ptprk
	Ptch2	Ext1		Kat6b
	Nrf1	Ndufb8		Mtcl1
	Commd6	Selrc1		Dido1
	A830080D01Rik	Pou5f1		Hspa4
	Dpy30	Foxred1		Smg5
	Cgnl1	Mnf1		Pigl
	Arhgef3	Extl3		Smarcad1
	Ipo9	Aco2		Hnrnpf
	Fbxo42	Tbc1d7		Hspbap1
	Cdk17	Mrp63		Rbpms
	BC030336	Dicer1		Kcmf1
	Rrp12	1810043H04Rik		Tjp2
	Ext1	Mrpl14		Lpar1
	Lsm6	Trrap		Manba
	Slc35b4	Lars2		Drg1
	Apc	Mrps18b		Ptpn14
	Dedd2	Psmf1		Suz12
	Wdr11	Bri3		Rprd2
	Pef1	Urod		Atp2a2
	Ldlrad3	Mrpl2		Adam19
	H2afv	Tefm		Kdm2b
	Alg13	Gatc		Cdk8
	Atrx	Ndufs2		Pum1
	Actr1b	Flcn		Taok1
	Rrm2	Wdr24		Atrx
	Xpo1	Shoc2		Brwd1
	Ehmt1	Psmc1		Eif3h
	Ptprk	Mrps31		Thada
	Rest	Timmdc1		Rbm26
	Lrp2	Ndufaf4		Ddc
	Ino80d	Gadd45gip1		Ppp2r5e
	Nhedc1	Uqcc		Huwe1
	Sms	Dolpp1		Arhgap21
	Nptn	Cox5a		Slc10a7
	Cd81	Eno1		Agps
	Mtf2	Nr0b1		Osbpl1a
	Rpn2	Ndufa13		Tle4
	BC052040	Uqcrc1		Usp34
	Tmem131	Smg6		Clybl
	Neo1	Uros		Rock2
	Gatad2a	Atp5o		Neo1
	Kit	Ndufb9		Tbl1xr1
	Fbxw7	Qrsl1		Klf8
	Nf2	Vps11		Qk
	Ubtf	Zfp217		Gpc3
	Rtkn2	Ndufs8		Robo1
	Nop14	Socs3		Magi1
	Prune2	Mrpl28		Dab1
	Pphln1	Ndufa3		Jade1
	Gsk3b	Cox18		Bicral
	Khdrbs3	Pkm		Klf9
	1110008L16Rik	Polg		Igf2bp1
	Uba6	Ndufs7		Cep68
	Rapgef1	B3gat3		Col18a1
	Impa2	Cox6c		Mybl2
	Def6	Mrgbp		Eif4e2
	E2f4	Coq2		Ubtf
	Rsf1	Eral1		Mreg
	Gde1	Mon2		Msh6
	Fam54b	Tmed10		Ppp2r5c
	Sec23a	Prmt1		Eed
	Nup107	Iba57		Wtap
	Nob1	1110008L16Rik		Ywhag
	Zfp473	Pdcd10		Myh9
	Lama5	Ndufc2		Slc6a6
	Nbr1	Edc4		Fbxo15
	Vangl1	C1qbp		Ift52
	Zfp58	Ndufb10		Trim71
	Wnk1	Vps25		Gtf2ird1
	Ssr2	Ccm2		Dhx9
	Mreg	Ndufs3		Ncoa3
	Spata7	Bptf		Pawr
	Sik3	AI462493		Sin3a
	Cst3	Caprin1		Tex10
	Uhrf1	Ppox		Pdha1
	Edc3	Pars2		Tspan14
	Traip	Pgd		Nap1l1
	Rpl13	Ubr4		Nedd4
	Prkci	Hgs		Sept9
	Rbck1	Coq5		Rab27a
	Map4k3	Vps29		Rapgef1
	Spast	Pced1b		Dab2ip
	Sptlc2	Cyc1		Ywhae
	4933426M11Rik	Mrps22		Chd2
	Pitpnc1	Smarca4		Ergic1
	Luc7l2	Dcp2		Rell1
	H2afj	Fastkd5		Ccnc
	Sephs1	Nrbp1		Tesk2
	Zbtb1	Vps41		Rfx7
	Mtmr3	Lias		Gpd2
	Gab1	L3mbtl2		Setx
	Ctbp2	Spop		Tpd52
	Mkln1	Coa6		Nf2
	Atp13a2	Bend3		Ubr4
	Hnrpll	Pgam1		Akap12
	Lasp1	Rtn4ip1		Abl1
	Ggnbp2	Gnb2l1		Anp32a
	Anp32a	Coq6		Prrc2c
	Exoc4	Mrpl46		Ylpm1
	Jam2	Mterfd2		Aff1
	Glce	Lipt2		Grb2
	Grlf1	Mrps2		Ankrd17
	Rere	Tmed2		Ccnd3
	Usp24	Mrpl49		Map4k4
	2810408M09Rik	Slc25a3		Flnb
	Ttc27	Cnot3		Gli2
	Aatf	Mtrf1l		Smchd1
	Nt5dc1	Pet112		Sos1
	Huwe1	Polg2		Tlk2
	Trim8	Mrpl34		Gtf2f2
	Pdlim1	Atic		Crebbp
	Med1	Mrps12		Bri3
	Zfp105	Atp1a1		Map4k3
	Rhbdd2	Tpi1		Upf2
	Tmeff1	Gpi1		Zfp644
	Dclk2	Mrpl20		Shroom3
	Xrcc5	Vps33a		Ofd1
	Ubxn7	Mrps34		2010111I01Rik
	Ep300	Pgs1		Sik3
	Ubr5	Jmjd1c		Rps6ka5
	Wdhd1	Nubpl		Gsk3b
	Tm9sf2	Mtg1		Hsd17b12
	X99384	Ndufs1		Pdgfc
	Dpy19l1	Ndufa9		Nek7
	Qrich1	Mrps24		Myof
	Mtus1	Mrps21		Snd1
	Trim6	Mrpl47		Cadm1
	Brpf3	Ptpn23		Chd9
	G2e3	Noa1		Nr6a1
	Calcoco2	Rbbp4		Wnk1
	B3gnt2	Mrpl43		Ralgapa1
	Commd1	3110001D03Rik		Nav2
	Tpm1	Lrpprc		Bcas3
	Alkbh8	Dgcr8		Stag1
	Hat1	Mrpl52		Tcf12
	Ctdspl2	Fnip1		Pbx1
	Pex6	Smarce1		Ajuba
	Mllt6	Lamtor2		Cers6
	Med13	Trmu		Tmem131l
	Dhx9	Mrpl51		Relch
	Hspa4	Mrpl50		Mrpl33
	Sulf1	Ept1		Ticrr
	Zfp280b	Mrpl4		Slc3a2
	Myb	Ndufb4		Rpl22
	Rnf128	Zic2		Zfp219
	Arih2	Ppa2		Cep55
	Mtmr7	Pcbp1		Impa2
	Leprotl1	Hs6st1		Otx2
	Cdc42ep5	Ago2		Utp14a
	Kras	Mrpl3		Nop58
	Lin54	Mtpap		Grhl3
	Epha2	Wdr1		Klf13
	Pum1	Tamm41		Pfdn1
	Rnf115	Pik3c3		Tdh
	Anapc1	Atp5sl		Hcfc1
	Ptplb	Dgcr14		Cbx5
	Larp4	Pten		Usp28
	Ipo5	Ndufs5		Zbtb2
	A230046K03Rik	Mrpl11		Eif4g2
		Zfp281		Rps6ka1
		Isca2		Cnpy1
		Amotl2		Bcat1
		Pcbp2		Erp29
		Gsk3b		Phc1
		Mrps28		Fubp1
		Mrpl35		Tpm3
		Ndufaf7		Scpep1
		Ppp1r8		Dpy30
		Rexo2		Tet2
		Wbscr16		Luc7l2
		Ndufv2		Nmt1
		Peo1		Slc7a1
		Mesdc1		Lypla1
		Mfn1		Sms
		Mrpl40		Casc3
		Jarid2		Hk2
		Ybey		Rnf7
		Lamtor3		Srpk1
		Cnot1		Lrrc2
		Vars2		Wasf2
		Txn2		Raf1
		Mrps15		Zdhhc20
		Uqcrq		Orc1
		Mrps10		Klhl12
		Tfb1m		Sept11
		Slc25a26		Pcmtd1
		Gfm1		Gmfb
		Lig3		Zfp710
		Coq7		Hsf2bp
		Fech		Cdc42ep3
		Tars2		Hs6st1
		Zbtb14		Ptk7
		Pik3r4		Fbxo42
		Slc25a19		2310022A10Rik
		Mrps11		C77080
		Smarcc1		Ncor2
		Det1		Nup188
		Oxsm		Pus7
		Drosha		Uck2
		Cdk8		Pdss1
		Eed		Dusp27
		Mrps18c		Ubl3
		Mrpl10		Zfp148
		Wars2		Nup155
		Atpaf2		Ifrd1
		Ptcd3		Cct3
		Yars2		Dmtf1
		Mrpl39		Rtf1
		Mrps18a		Abl2
		Ndrg3		Mtss1
		Ndufb3		Sfrp1
		Lipt1		Sec14l1
		Mrps26		Gatad2a
		Mrpl38		Xpo1
		Mrpl17		Sgk1
		Rab7		Cabin1
		Ecsit		Drosha
		Ugdh		Nrf1
		Sdhb		Dennd2c
		Ccz1		Rnf115
		Sco1		Ywhaz
		Mrpl45		Ppp6r3
		Supv3l1		Cbx7
		Mrpl33		Cenpc1
		Kdm2b		Dcun1d4
		Pcgf1		Gfpt2
		Fh1		Itpk1
		Eny2		Rps4x
		Zeb1		Sparc
		Trmt10c		Gabbr1
		Gtpbp8		Ncaph2
		Aifm1		Ulk1
		Sirt6		Ahdc1
		Slc39a9		Gadd45gip1
		Mbd3		Brd1
		Mrpl27		E2f4
		Dnajc13		Prkci
		Grb2		Paics
		Ddx6		Stmn1
		Mrps25		Ier2
		Srsf6		Senp3
		Acad9		Tada3
		Pnpt1		Mkrn1
		Mrpl42		Nudcd2
		Kdm1a		Ccdc160
		Romo1		Mlec
		Gatad2a		Pdgfa
		Mipep		Ssr2
		Sod2		Eef1g
		Trub2		Sesn2
		Apc		Klhl11
		Tomm70a		Esrrb
		Fdx1		Srsf4
		Mtif3		Sulf2
		Emc4		Lamtor2
		Mcm3ap		Traip
		Emc6		Jam2
		Pdss1		Zmynd8
		Cltc		Eef1e1
		Uso1		Gstz1
		Degs1		Cdc42ep4
		Glce		Apobec3
		Mrps35		Cxxc5
		Ndufa6		Morf4l2
		Frs2		F2rl1
		Nsun4		Sall4
		Mrps5		Glud1
		Trit1		Arl6ip1
		Smg7		Trim59
		Mterfd1		Naa25
		1190002N15Rik		Rangap1
		Zfp574		Ptpn11
		B4galt7		Snrnp70
		Coa5		Arf1
		Ndufb11		Fus
		Slc7a5		Zic3
		Chchd5		Urm1
		Mnt		Fgfr1
		Gpaa1		Mov10
		Itgb1bp1		Hnrnph1
		Ndufaf1		Fundc2
		Mrpl44		3110082I17Rik
		Ube3c		Ddx21
		Lamtor5		Hmga1
		Usp22		Sema4b
		Snf8		St13
		Pih1d1		Cd9
		Uvrag		Igfbp2
		Cox17		Rragc
		Uxs1		Gpa33
		Alg9		Manbal
		Sap18		Spin1
		Mrps17		Pgam1
		Eif3h		Ttpa
		Dohh		Clns1a
		Ubap1		Clic4
		Cab39		Ak1
		Alg12		Zc3h18
		Ndufb5		Pole2
		Cap1		D230025D16Rik
		Capzb		Itga6
		Ube2m		Usp48
		Tmem126b		Wipi2
		Rbpj		Eif4b
		Psmc3		Sephs1
		Cycs		Ctps
		Mettl17		Ctnnb1
		Cox19		Nfe2l2
		Ehmt1		Slc9a1
		Alad		Plekhm1
		Csnk2b		Foxp4
		Taf6l		Ubxn2a
		Idh3a		Fgd1
		Ndufa5		Vangl1
		Chmp6		Zscan10
		Ndufb7		Amotl2
		Mrpl54		Wdr45
		Fgf4		Srsf7
		Mrpl55		Acp6
		Ndufaf6		Brd2
		Zc3h18		Prdx1
		Cox7b		Trim8
		Chmp5		Sfpq
		Gfm2		Eif4a2
		Atp5b		Taf1d
		Ing3		Tsr1
		Ngrn		Tor2a
		Get4		Slc25a39
		Ptpn2		Rpl10a
		Cep350		Tubb2b
		Rab9		Ucp2
		Dap3		Fgf4
		Becn1		Rpl10
		Cox20		Tcf19
		Mrpl12		Pou5f1
		Papss1		Fgf17
		Mtfmt		Rcc1
		Dpy30		Lama5
		Dcp1a		Cst3
		Tada2b		Chka
		Icmt		Pgs1
		Mrpl48		Trmt2a
		Mrps9		Gjb3
		Mrpl22		Rpl27
		Abhd11		Cdk9
		Zfp598		2410002F23Rik
		Cox11		Cox4i1
		Zfp296		Mrpl38
		Aasdhppt		Irf2bp2
		Otx2		Tmem69
		Mtif2		Zic2
		Mrpl9		Rest
		Vps36		Glb1
		Rcor2		Eef1b2
		Ehmt2		Ywhab
		Taok1		Ppia
		Hk2		Ptgfrn
		Arrdc3		Ranbp1
		Slc39a1		Mpdu1
		Ccdc130		Gemin7
		Aurkaip1		Rinl
		Foxi3		Shkbp1
		Fen1		Mrpl42
		Ap3d1		Rpl26
		Mrpl32		Hspa5
		Txnrd1		Poldip2
		Ddx5		Cbll1
		Rars2		Ldb1
		Mrps30		Rps20
		Ajuba		Degs1
		Psmc6		Trrap
		Tmem70		Ngfr
		Mthfd1		Atp13a2
		Ngly1		Cic
		Ak2		Ddx39b
		Polrmt		Srp9
		Ndufa10		Npr1
		Ppat		Mettl16
		Tfdp1		Fmnl3
		Rbm12		Idh1
		Pigt		Ss18
		Uqcrb		Rbm14
		Rfwd2		Slc17a9
		Hira		Slc25a44
		Dhfr		Slc25a3
		Bcor		Zfp57
		Ddi2		Tubb3
		Sdhc		Stx12
		Tgif1		Cdk16
		Braf		Pex6
		Slc16a1		Bysl
		Dars2		Nop2
		Hnrnpf		Rpa2
		Mrpl15		Rpl7l1
		Ptpn12		Slc7a7
		Ftsj2		Smcr8
		Ndufs6		Taok2
		Arpc3		Mdfi
		Ube2f
		Dpm3
		Atp5c1
		Uqcrfs1
		Slc4a7
		Hnrnpl
		Nfu1
		Dnajc2
		Fpgs
		Coa3
		Vps28
		Mrpl30
		Rnf7
		Nomo1
		Psmc2
		Nr2c2
		Mrps7
		Ipmk
		Higd2a
		Vrtn
		Emc2
		Foxk1
		Prrc2a
		Coq3
		Dlst
		Dcps
		Hinfp
		Usp48
		Lin9
		Rbm7
		Ahcy
		Recql4
		Ubn2
		Serf2
		Taf5l
		Upf2
		Hdac1
		Cbll1
		Skiv2l
		B3galt6
		Bloc1s1
		Foxd3
		Atp6v0d1
		Larp1
		Parg
		Afg3l2
		Dhodh
		Yme1l1
		Sdha
		3110002H16Rik
		Dnajc11
		Kmt2b
		Kcnrg
		Dazap1
		Nup133
		Adss
		Tti2
		Pex14
		Hars2
		Mrrf
		Krt4
		Vps35
		Tceb3
		Ahdc1
		Fam98a
		Pigs
		Mapk1
		Ptcd2
		Lpin1
		Ccdc171
		Strap
		Pfkfb3
		Fdxr
		Rprd1b
		Immt
		Prss39
		Safb
		Hnrnpk
