# Supplementary material for: A Genome-Wide CRISPR Screen Identifies Factors Regulating Pluripotency Exit in Mouse Embryonic Stem Cells
Source: Cells. 2022 Jul 25;11(15):2289. doi: 10.3390/cells11152289 (PMC9331787; doi:10.3390/cells11152289)
Supplement: Supplementary file 1 [file cells-11-02289-s001.zip › Table S4.xlsx]

## Sheet: gRNA
Gene	gRNA1(library)	gRNA2
Socs3	GTCCTTTGCCTGATTCGCCC
Trp53	ATGGTGATGGTAAGCCCTCA	GACGTGCCCTGTGCAGTTGT
Tsc1	ATGCTTGTCAACACGTTGGT
Nf2	AGACATTCACGGTGCGGATC	CCTCGCTGTGGTGACAGTCGAAG
Csnk1a1	TATTGGGCGTCACTGTAATA
Zfp771	CATGTGCGCGACGGTGGC
Olfr769	GTACATGATGGCCACAGGAG
4930519G04Rik	ACAGGGTCATCATGGAGGTA
Fam24a	AGGCCCTGAAGTGAGTCTTG
Pfkfb4	CAACTGGATTGGCGTGCCTA	GGACAAGGCGCTGGATTACG
Slitrk6	TACAACGGAAAGACCCTCTT	TTCAGGATGCAAGCTTATTA
Pcdhb19	AGAATACGGGGGAGTTGTCA	GGACAAGGCGCTGGATTACG
Fam131c	GTGCCCACAAAAACAGCCCC
Mapkbp1	GGATGTGGCTGAACGTAGCC
Kxd1	GTGTGCGGCTGCAACAGATG
Olfr1200	ATCTTAGCAATTGTTAACTC	ATGTTTTACCTGCAGGAAGT
Pid1	ACGCCCTCCTAGAGATCCGG	GGCGAAGATGTTGGGGCTCA
Tab1	GTACGGGGTCTTCAATGGCT	GAACTGATCTTTGGTAGGGG
Tcf7l1	CGGAGCGAACGACGAGCTGA	TGGTCAACGAATCGGAGAAT
Dhx30	GAAGATTGATGCTGAGCGTC	GCTAGCTATGTGTCATCTAG
Zc3h11a	GCTCACAGTTCAACAGAGCA	GATTACAACAGGCGGATGTG
Nos3	GGACTTCATCAATCAGTACT	GCCTGAGACCAAGGATCGTT
Olfr620	GGTGATCAGCAACTTGTTAG	TTCAGGCGGATAATAACTGG
Stox2	GGGTGACAGGCTTTCTCGCA	GCTGCGTGTGACAAATGGCG
