# Supplementary material for: A Genome-Wide CRISPR Screen Identifies Factors Regulating Pluripotency Exit in Mouse Embryonic Stem Cells
Source: Cells. 2022 Jul 25;11(15):2289. doi: 10.3390/cells11152289 (PMC9331787; doi:10.3390/cells11152289)
Supplement: Supplementary file 1 [file cells-11-02289-s001.zip › Table S5.xlsx]

## Sheet: diff_sig_down_Zfp771-KO_mESCs
geneid	chr	start	end	length	strand	name	Zfp771.2	Zfp771.3	Zfp771.1	WT.2	WT.1	WT.3	Zfp771.2_FPKM	Zfp771.3_FPKM	Zfp771.1_FPKM	WT.2_FPKM	WT.1_FPKM	WT.3_FPKM	baseMean	log2FC	Pvalue	Padj	trend	Description	GO	Pathway	TF
ENSMUSG00000028435	4	41092722	41098183	2166	-	Aqp3	185.013	276.624	283.464	7406.03	8541.26	8269.7	6.6296	9.96672	9.8894	246.049	281.936	272.004	4160.35	-5.02419	1.6089e-175	6.60887e-171	DOWN	aquaporin 3 [Source:MGI Symbol;Acc:MGI:1333777]	[GO:0016020:membrane][GO:0055085:transmembrane transport][GO:0015267:channel activity][GO:0016021:integral component of membrane][GO:0005886:plasma membrane][GO:0005634:nucleus][GO:0005737:cytoplasm][GO:0005886:plasma membrane][GO:0005886:plasma membrane][GO:0005911:cell-cell junction][GO:0005911:cell-cell junction][GO:0005887:integral component of plasma membrane][GO:0016323:basolateral plasma m…	-	-
ENSMUSG00000053062	16	84774123	84825928	8241	+	Jam2	98.6154	92.2081	74.3512	2004.16	1831.03	1882.96	1.42723	1.34182	1.04767	26.8926	24.4111	25.0144	997.221	-4.4215	7.90303e-130	3.24633e-126	DOWN	junction adhesion molecule 2 [Source:MGI Symbol;Acc:MGI:1933820]	[GO:0016020:membrane][GO:0016021:integral component of membrane][GO:0005886:plasma membrane][GO:0030054:cell junction][GO:0046982:protein heterodimerization activity][GO:0007162:negative regulation of cell adhesion][GO:0005923:bicellular tight junction][GO:0016020:membrane][GO:0016021:integral component of membrane]	-	-
ENSMUSG00000003032	4	55527143	55532466	4410	-	Klf4	284.501	259.061	210.275	3947.9	3513.11	3704.64	5.94038	5.43888	4.27468	76.4271	67.5719	71.0031	1986.58	-3.88421	1.43554e-124	4.53597e-121	DOWN	Kruppel-like factor 4 (gut) [Source:MGI Symbol;Acc:MGI:1342287]	[GO:0003676:nucleic acid binding][GO:0045944:positive regulation of transcription by RNA polymerase II][GO:0046872:metal ion binding][GO:0003677:DNA binding][GO:0005634:nucleus][GO:0005634:nucleus][GO:0005634:nucleus][GO:0005634:nucleus][GO:0005654:nucleoplasm][GO:0005634:nucleus][GO:0005737:cytoplasm][GO:0010033:response to organic substance][GO:0045944:positive regulation of transcription by RN…	-	zf-C2H2
ENSMUSG00000012396	6	122707489	122714633	6217	+	Nanog	1282.87	1386.05	1374.34	11186.2	10201	10584.1	36.6965	39.8654	38.2755	296.669	268.799	277.906	6002.42	-2.98327	4.3175e-115	1.04324e-111	DOWN	Nanog homeobox [Source:MGI Symbol;Acc:MGI:1919200]	[GO:0003677:DNA binding][GO:0006355:regulation of transcription, DNA-templated][GO:0043565:sequence-specific DNA binding][GO:0005634:nucleus][GO:0045944:positive regulation of transcription by RNA polymerase II][GO:0005634:nucleus][GO:0005634:nucleus][GO:0005634:nucleus][GO:0010468:regulation of gene expression][GO:0010033:response to organic substance][GO:0007275:multicellular organism developme…	-	Homeobox
ENSMUSG00000041359	12	105216750	105222793	5411	-	Tcl1	114.324	95.1353	144.056	1924.79	2094.89	2057.85	5.17202	4.32754	6.34511	80.7341	87.3026	85.4549	1071.84	-4.11629	1.1163e-106	2.29271e-103	DOWN	T cell lymphoma breakpoint 1 [Source:MGI Symbol;Acc:MGI:1097166]	[GO:0005634:nucleus][GO:0005634:nucleus][GO:0032991:protein-containing complex][GO:0005737:cytoplasm][GO:0042802:identical protein binding][GO:0005783:endoplasmic reticulum][GO:0010629:negative regulation of gene expression][GO:0033138:positive regulation of peptidyl-serine phosphorylation][GO:0071902:positive regulation of protein serine/threonine kinase activity][GO:0019901:protein kinase bindi…	-	-
ENSMUSG00000042312	3	90514435	90524581	715	+	S100a13	58.4711	113.431	138.247	3057.66	4022.73	3914	5.17208	10.0886	11.906	250.763	327.785	317.794	1884.09	-5.15565	6.86907e-103	1.22679e-99	DOWN	S100 calcium binding protein A13 [Source:MGI Symbol;Acc:MGI:109581]	[GO:0005509:calcium ion binding][GO:0005507:copper ion binding]	-	-
ENSMUSG00000031558	5	47983138	48307733	72633	+	Slit2	37.5262	45.3722	24.3965	1405.26	1090.53	1184.67	0.23829	0.289693	0.150829	8.27329	6.37901	6.90507	631.292	-5.07021	5.17324e-99	8.50005e-96	DOWN	slit guidance ligand 2 [Source:MGI Symbol;Acc:MGI:1315205]	[GO:0005515:protein binding][GO:0005509:calcium ion binding][GO:0005615:extracellular space][GO:0060412:ventricular septum morphogenesis][GO:0005615:extracellular space][GO:0005615:extracellular space][GO:0005615:extracellular space][GO:0008201:heparin binding][GO:0005515:protein binding][GO:0005737:cytoplasm][GO:0042802:identical protein binding][GO:0042803:protein homodimerization activity][GO:…	-	-
ENSMUSG00000042414	1	13113457	13127163	2564	-	Prdm14	13.0905	15.368	12.7791	920.003	726.667	933.181	0.322901	0.381159	0.306902	21.0403	16.5117	21.129	436.848	-5.95358	3.14647e-91	4.78694e-88	DOWN	PR domain containing 14 [Source:MGI Symbol;Acc:MGI:3588194]	[GO:0005515:protein binding][GO:0003676:nucleic acid binding][GO:0016740:transferase activity][GO:0046872:metal ion binding][GO:0048873:homeostasis of number of cells within a tissue][GO:0003677:DNA binding][GO:0005634:nucleus][GO:0005634:nucleus][GO:0005654:nucleoplasm][GO:0005634:nucleus][GO:0010468:regulation of gene expression][GO:0005515:protein binding][GO:0003700:DNA-binding transcription …	-	zf-C2H2
ENSMUSG00000018604	5	119670669	119684724	18820	+	Tbx3	177.159	199.784	144.056	2040.24	1950.19	1968.49	2.24899	2.55014	1.7805	24.0137	22.8059	22.9382	1079.99	-3.50795	1.33031e-89	1.82151e-86	DOWN	T-box 3 [Source:MGI Symbol;Acc:MGI:98495]	[GO:0006355:regulation of transcription, DNA-templated][GO:0005634:nucleus][GO:0003700:DNA-binding transcription factor activity][GO:0003677:DNA binding][GO:0005634:nucleus][GO:0005634:nucleus][GO:0005634:nucleus][GO:0007275:multicellular organism development][GO:0045893:positive regulation of transcription, DNA-templated][GO:0000978:RNA polymerase II proximal promoter sequence-specific DNA bindi…	-	T-box
ENSMUSG00000021255	12	86361117	86521628	15033	+	Esrrb	1816.09	1606.32	1484.7	10870.5	11184.1	10710.5	26.7116	23.7559	21.2612	148.238	151.532	144.602	6278.7	-2.73872	9.39228e-88	1.20565e-84	DOWN	estrogen related receptor, beta [Source:MGI Symbol;Acc:MGI:1346832]	[GO:0003677:DNA binding][GO:0003707:steroid hormone receptor activity][GO:0008270:zinc ion binding][GO:0006355:regulation of transcription, DNA-templated][GO:0005634:nucleus][GO:0005496:steroid binding][GO:0003700:DNA-binding transcription factor activity][GO:0043565:sequence-specific DNA binding][GO:0046872:metal ion binding][GO:0043401:steroid hormone mediated signaling pathway][GO:0003677:DNA …	-	ESR-like
ENSMUSG00000068245	14	59347407	59365470	8050	-	Phf11d	476.495	458.113	476.313	3503.23	3184.35	3620.39	10.1366	9.79907	9.86538	69.0962	62.4023	70.6953	1953.15	-2.86944	2.30543e-87	2.8697e-84	DOWN	PHD finger protein 11D [Source:MGI Symbol;Acc:MGI:1277133]	[GO:0046872:metal ion binding][GO:0003674:molecular_function][GO:0008150:biological_process][GO:0005634:nucleus][GO:0005654:nucleoplasm][GO:0031965:nuclear membrane][GO:0046872:metal ion binding][GO:0003674:molecular_function][GO:0008150:biological_process][GO:0005634:nucleus][GO:0005654:nucleoplasm][GO:0031965:nuclear membrane][GO:0046872:metal ion binding][GO:0003674:molecular_function][GO:0008…	-	-
ENSMUSG00000030523	7	64153835	64269775	44804	+	Trpm1	11.3451	7.3181	8.13217	730.591	922.431	915.309	0.12564	0.0814879	0.087682	7.50141	9.41013	9.30436	432.521	-6.58563	6.10399e-86	7.37452e-83	DOWN	transient receptor potential cation channel, subfamily M, member 1 [Source:MGI Symbol;Acc:MGI:1330305]	[GO:0016021:integral component of membrane][GO:0016020:membrane][GO:0006811:ion transport][GO:0055085:transmembrane transport][GO:0005216:ion channel activity][GO:0034220:ion transmembrane transport][GO:0005261:cation channel activity][GO:0051262:protein tetramerization][GO:0007216:G protein-coupled glutamate receptor signaling pathway][GO:0071482:cellular response to light stimulus][GO:0005886:p…	-	-
ENSMUSG00000021953	14	63492347	63509092	5835	-	Tdh	363.917	231.252	268.361	3218.21	3280.11	3126.35	12.2361	7.81814	8.78513	100.324	101.595	96.4893	1748.03	-3.47908	1.20023e-80	1.29742e-77	DOWN	L-threonine dehydrogenase [Source:MGI Symbol;Acc:MGI:1926231]	[GO:0003824:catalytic activity][GO:0050662:coenzyme binding][GO:0016491:oxidoreductase activity][GO:0055114:oxidation-reduction process][GO:0005739:mitochondrion][GO:0005739:mitochondrion][GO:0042802:identical protein binding][GO:0019518:L-threonine catabolic process to glycine][GO:0006567:threonine catabolic process][GO:0006567:threonine catabolic process][GO:0008743:L-threonine 3-dehydrogenase …	[mmu00260:Glycine, serine and threonine metabolism]	-
ENSMUSG00000042367	4	127325235	127330844	3503	-	Gjb3	404.934	363.71	533.238	3721.5	4121.68	3768.47	13.6225	12.3028	17.4654	116.076	127.729	116.369	2152.26	-3.16129	4.13147e-75	4.13923e-72	DOWN	gap junction protein, beta 3 [Source:MGI Symbol;Acc:MGI:95721]	[GO:0007154:cell communication][GO:0005922:connexin complex][GO:0016020:membrane][GO:0016021:integral component of membrane][GO:0005886:plasma membrane][GO:0005737:cytoplasm][GO:0030054:cell junction][GO:0005911:cell-cell junction][GO:0030054:cell junction][GO:0043231:intracellular membrane-bounded organelle][GO:0005515:protein binding][GO:0001890:placenta development][GO:0005921:gap junction][GO…	-	-
ENSMUSG00000033213	2	122636986	122641191	2585	+	AA467197	18.3267	27.077	54.6017	1055.3	1021.38	1004.67	1.46349	2.17411	4.24519	78.1323	75.1337	73.6426	530.225	-4.98823	2.56704e-71	2.34325e-68	DOWN	expressed sequence AA467197 [Source:MGI Symbol;Acc:MGI:3034182]	[GO:0016020:membrane][GO:0016021:integral component of membrane][GO:0016020:membrane][GO:0016021:integral component of membrane][GO:0005634:nucleus][GO:0005634:nucleus][GO:0005634:nucleus][GO:0022900:electron transport chain][GO:0009617:response to bacterium][GO:1902600:proton transmembrane transport][GO:0005739:mitochondrion][GO:0004129:cytochrome-c oxidase activity][GO:0005751:mitochondrial res…	-	-
ENSMUSG00000067338	6	145615757	145621479	1775	+	Tuba3b	129.16	97.3308	95.2625	1294.32	1178.84	1101.69	4.60214	3.48705	3.30476	42.7586	38.6928	36.0323	649.433	-3.47204	1.48356e-68	1.32479e-65	DOWN	tubulin, alpha 3B [Source:MGI Symbol;Acc:MGI:1095408]	[GO:0005525:GTP binding][GO:0007017:microtubule-based process][GO:0005874:microtubule][GO:0003924:GTPase activity][GO:0005200:structural constituent of cytoskeleton][GO:0003674:molecular_function][GO:0008150:biological_process][GO:0015630:microtubule cytoskeleton][GO:0005737:cytoplasm][GO:0000166:nucleotide binding][GO:0005856:cytoskeleton][GO:0007010:cytoskeleton organization][GO:0000226:microtu…	-	-
ENSMUSG00000085396	X	50555744	50635321	16354	-	Firre	888.411	879.636	636.632	6086.45	5534.58	5914.4	10.1149	10.0699	7.05702	64.2482	58.0463	61.8098	3323.35	-2.86418	2.03979e-68	1.78273e-65	DOWN	functional intergenic repeating RNA element [Source:MGI Symbol;Acc:MGI:2147989]	-	-	-
ENSMUSG00000028640	2	172549593	172558622	13657	+	Tfap2c	690.308	635.211	626.177	3344.48	3366.29	3280.81	14.6261	13.5326	12.9172	65.7	65.7023	63.807	1990.55	-2.35566	2.31747e-63	1.83067e-60	DOWN	transcription factor AP-2, gamma [Source:MGI Symbol;Acc:MGI:106032]	[GO:0006355:regulation of transcription, DNA-templated][GO:0005634:nucleus][GO:0003700:DNA-binding transcription factor activity][GO:0003677:DNA binding][GO:0005634:nucleus][GO:0005634:nucleus][GO:0005654:nucleoplasm][GO:0005634:nucleus][GO:0005515:protein binding][GO:0045944:positive regulation of transcription by RNA polymerase II][GO:0045944:positive regulation of transcription by RNA polymera…	-	AP-2
ENSMUSG00000034714	11	114675431	114720977	4181	+	Ttyh2	403.188	382.005	331.095	2196.28	2242.77	2174.02	7.31494	6.96865	5.84847	36.9438	37.4828	36.2048	1288.23	-2.56421	6.79663e-61	5.0761e-58	DOWN	tweety family member 2 [Source:MGI Symbol;Acc:MGI:2157091]	[GO:0016020:membrane][GO:0016021:integral component of membrane][GO:0005886:plasma membrane][GO:0006811:ion transport][GO:0005886:plasma membrane][GO:0034220:ion transmembrane transport][GO:0016021:integral component of membrane][GO:1902476:chloride transmembrane transport][GO:0005229:intracellular calcium activated chloride channel activity][GO:0005254:chloride channel activity][GO:0006821:chlor…	-	-
ENSMUSG00000006200	X	37826910	37829857	1010	+	Rhox6	368.28	361.514	390.344	2106.09	2119.36	1987.64	23.0615	22.762	23.7981	122.274	122.252	114.247	1222.2	-2.47309	1.80137e-60	1.29815e-57	DOWN	reproductive homeobox 6 [Source:MGI Symbol;Acc:MGI:1202888]	[GO:0003677:DNA binding][GO:0008150:biological_process][GO:0005575:cellular_component][GO:0005634:nucleus][GO:0003677:DNA binding]	-	Homeobox
ENSMUSG00000054727	X	53742901	53757831	1224	-	1700013H16Rik	502.677	671.07	597.133	3727.82	3395.01	3910.17	25.9739	34.8653	30.0405	178.589	161.597	185.458	2133.98	-2.63851	2.21101e-60	1.56589e-57	DOWN	RIKEN cDNA 1700013H16 gene [Source:MGI Symbol;Acc:MGI:1922764]	[GO:0005634:nucleus][GO:0005515:protein binding][GO:0007283:spermatogenesis][GO:0007286:spermatid development][GO:0051321:meiotic cell cycle][GO:0000795:synaptonemal complex][GO:0005730:nucleolus][GO:0000785:chromatin][GO:0001741:XY body]	-	-
ENSMUSG00000040013	5	135291704	135350044	5266	-	Fkbp6	425.879	441.282	571.575	2965.66	3583.33	3209.33	18.6143	19.3934	24.3232	120.18	144.275	128.759	1866.17	-2.76483	8.82312e-60	6.14284e-57	DOWN	FK506 binding protein 6 [Source:MGI Symbol;Acc:MGI:2137612]	[GO:0005515:protein binding][GO:0005634:nucleus][GO:0005737:cytoplasm][GO:0005737:cytoplasm][GO:0005694:chromosome][GO:0042802:identical protein binding][GO:0007283:spermatogenesis][GO:0007283:spermatogenesis][GO:0007283:spermatogenesis][GO:0030154:cell differentiation][GO:0031047:gene silencing by RNA][GO:0031047:gene silencing by RNA][GO:0005829:cytosol][GO:0005829:cytosol][GO:0000413:protein p…	-	-
ENSMUSG00000028766	4	137741733	137796384	6338	-	Alpl	2034.27	2008.09	2328.12	9352.46	9860.54	9511.81	51.0145	50.6342	56.8431	217.451	227.787	218.952	5849.22	-2.17342	6.24654e-59	4.27648e-56	DOWN	alkaline phosphatase, liver/bone/kidney [Source:MGI Symbol;Acc:MGI:87983]	[GO:0016791:phosphatase activity][GO:0003824:catalytic activity][GO:0016020:membrane][GO:0046872:metal ion binding][GO:0005615:extracellular space][GO:0005886:plasma membrane][GO:0016787:hydrolase activity][GO:0005515:protein binding][GO:0005886:plasma membrane][GO:0005886:plasma membrane][GO:0031012:extracellular matrix][GO:0051384:response to glucocorticoid][GO:0016311:dephosphorylation][GO:003…	[mmu00790:Folate biosynthesis]	-
ENSMUSG00000006056	11	96099326	96111964	2589	-	Calcoco2	305.446	284.674	439.137	2551.66	2556.63	2588.91	11.9174	11.1679	16.6814	92.3039	91.8881	92.718	1454.41	-2.9084	7.54645e-56	4.62665e-53	DOWN	calcium binding and coiled-coil domain 2 [Source:MGI Symbol;Acc:MGI:1343177]	[GO:0016020:membrane][GO:0006914:autophagy][GO:0005737:cytoplasm][GO:0031410:cytoplasmic vesicle][GO:0005856:cytoskeleton][GO:0048471:perinuclear region of cytoplasm][GO:0005776:autophagosome][GO:0098792:xenophagy][GO:1901098:positive regulation of autophagosome maturation][GO:0000421:autophagosome membrane][GO:0005737:cytoplasm][GO:0016605:PML body]	-	-
ENSMUSG00000009941	X	134944526	134964754	8898	-	Nxf2	86.3975	100.99	92.939	769.375	880.937	843.821	2.28343	2.68375	2.39151	18.8528	21.4475	20.471	462.41	-3.15088	9.41111e-56	5.685e-53	DOWN	nuclear RNA export factor 2 [Source:MGI Symbol;Acc:MGI:1933192]	[GO:0005634:nucleus][GO:0005515:protein binding][GO:0003723:RNA binding][GO:0005737:cytoplasm][GO:0003676:nucleic acid binding][GO:0051028:mRNA transport][GO:0006406:mRNA export from nucleus][GO:0005634:nucleus][GO:0005634:nucleus][GO:0005515:protein binding][GO:0016973:poly(A)+ mRNA export from nucleus][GO:0003723:RNA binding][GO:0003723:RNA binding][GO:0005635:nuclear envelope][GO:0005635:nucle…	-	-
ENSMUSG00000019970	10	21882184	21999903	17744	+	Sgk1	569.875	527.635	428.681	3182.13	2732.18	2842.95	11.6415	10.8378	8.5261	60.2695	51.4141	53.3088	1713.91	-2.51839	5.69392e-53	3.03752e-50	DOWN	serum/glucocorticoid regulated kinase 1 [Source:MGI Symbol;Acc:MGI:1340062]	[GO:0005524:ATP binding][GO:0006468:protein phosphorylation][GO:0004674:protein serine/threonine kinase activity][GO:0004672:protein kinase activity][GO:0035091:phosphatidylinositol binding][GO:0016020:membrane][GO:0016740:transferase activity][GO:0005886:plasma membrane][GO:0005634:nucleus][GO:0005634:nucleus][GO:0048471:perinuclear region of cytoplasm][GO:0005829:cytosol][GO:0005634:nucleus][GO…	[mmu04151:PI3K-Akt signaling pathway][mmu04960:Aldosterone-regulated sodium reabsorption]	-
ENSMUSG00000025056	X	86191764	86195947	1808	+	Nr0b1	148.359	145.63	138.247	954.278	957.54	977.862	5.18975	5.12224	4.7084	30.9497	30.8555	31.3986	553.653	-2.73927	3.10463e-52	1.63499e-49	DOWN	nuclear receptor subfamily 0, group B, member 1 [Source:MGI Symbol;Acc:MGI:1352460]	[GO:0003677:DNA binding][GO:0003707:steroid hormone receptor activity][GO:0006355:regulation of transcription, DNA-templated][GO:0005634:nucleus][GO:0030325:adrenal gland development][GO:0005634:nucleus][GO:0005634:nucleus][GO:0005634:nucleus][GO:0007530:sex determination][GO:0005515:protein binding][GO:0005737:cytoplasm][GO:0005737:cytoplasm][GO:0005737:cytoplasm][GO:0042803:protein homodimeriza…	-	Miscellaneous
ENSMUSG00000030722	7	126382854	126396737	3823	-	Nfatc2ip	725.216	664.484	661.029	3077.5	2963.06	2998.69	13.538	12.4723	12.0142	53.2642	50.9531	51.3829	1848.33	-2.13987	6.31389e-52	3.28298e-49	DOWN	nuclear factor of activated T cells, cytoplasmic, calcineurin dependent 2 interacting protein [Source:MGI Symbol;Acc:MGI:1329015]	[GO:0005515:protein binding][GO:0005634:nucleus][GO:0005634:nucleus][GO:0005737:cytoplasm][GO:0045944:positive regulation of transcription by RNA polymerase II][GO:0001816:cytokine production]	-	-
ENSMUSG00000027452	2	150618105	150668500	5871	-	Acss1	250.466	197.589	194.01	1315.06	1453.33	1454.03	4.37834	3.47297	3.30197	21.3137	23.403	23.3311	810.748	-2.71567	7.77034e-52	3.98978e-49	DOWN	acyl-CoA synthetase short-chain family member 1 [Source:MGI Symbol;Acc:MGI:1915988]	[GO:0003824:catalytic activity][GO:0003987:acetate-CoA ligase activity][GO:0016208:AMP binding][GO:0019427:acetyl-CoA biosynthetic process from acetate][GO:0000166:nucleotide binding][GO:0005524:ATP binding][GO:0005739:mitochondrion][GO:0016874:ligase activity][GO:0005739:mitochondrion][GO:0005739:mitochondrion][GO:0005759:mitochondrial matrix][GO:0005759:mitochondrial matrix][GO:0005759:mitochon…	[mmu00010:Glycolysis / Gluconeogenesis][mmu00620:Pyruvate metabolism][mmu00640:Propanoate metabolism]	-
ENSMUSG00000026398	1	136842571	136960448	13094	-	Nr5a2	100.361	76.8401	44.146	1142.79	897.96	1060.84	1.34109	1.03242	0.574344	14.1583	11.0534	13.012	553.822	-3.79417	2.17837e-51	1.09123e-48	DOWN	nuclear receptor subfamily 5, group A, member 2 [Source:MGI Symbol;Acc:MGI:1346834]	[GO:0003677:DNA binding][GO:0003707:steroid hormone receptor activity][GO:0008270:zinc ion binding][GO:0006355:regulation of transcription, DNA-templated][GO:0005634:nucleus][GO:0003700:DNA-binding transcription factor activity][GO:0043565:sequence-specific DNA binding][GO:0045944:positive regulation of transcription by RNA polymerase II][GO:0045944:positive regulation of transcription by RNA pol…	-	SF-like
ENSMUSG00000067276	X	143802231	143827414	8100	-	Capn6	50.6167	51.9585	25.5582	653.924	639.424	643.397	0.705284	0.727953	0.346727	8.44788	8.20735	8.22905	344.146	-3.8913	2.40883e-51	1.19214e-48	DOWN	calpain 6 [Source:MGI Symbol;Acc:MGI:1100850]	[GO:0005622:intracellular][GO:0006508:proteolysis][GO:0004198:calcium-dependent cysteine-type endopeptidase activity][GO:0048471:perinuclear region of cytoplasm][GO:0005829:cytosol][GO:0005737:cytoplasm][GO:0005856:cytoskeleton][GO:0005737:cytoplasm][GO:0005515:protein binding][GO:0005874:microtubule][GO:0005874:microtubule][GO:0008017:microtubule binding][GO:0005819:spindle][GO:0048471:perinucle…	-	-
ENSMUSG00000019817	10	13060504	13131694	24505	+	Plagl1	77.6705	111.235	84.8069	1121.14	810.718	911.479	0.9339	1.34482	0.9928	12.4984	8.97961	10.0599	519.508	-3.37073	3.443e-51	1.68367e-48	DOWN	pleiomorphic adenoma gene-like 1 [Source:MGI Symbol;Acc:MGI:1100874]	[GO:0003676:nucleic acid binding][GO:0005794:Golgi apparatus][GO:0016604:nuclear body][GO:0010468:regulation of gene expression][GO:0005515:protein binding][GO:0045944:positive regulation of transcription by RNA polymerase II][GO:0043231:intracellular membrane-bounded organelle][GO:0001228:DNA-binding transcription activator activity, RNA polymerase II-specific][GO:0035914:skeletal muscle cell di…	-	zf-C2H2
ENSMUSG00000053388	5	135353295	135368005	3259	+	Trim50	5.23621	13.9044	5.80869	363.491	464.939	409.783	0.183676	0.490414	0.198381	11.8217	15.0236	13.1944	210.527	-5.56755	3.82689e-49	1.78633e-46	DOWN	tripartite motif-containing 50 [Source:MGI Symbol;Acc:MGI:2664992]	[GO:0008270:zinc ion binding][GO:0005515:protein binding][GO:0046872:metal ion binding][GO:0008270:zinc ion binding][GO:0005515:protein binding][GO:0016740:transferase activity][GO:0046872:metal ion binding][GO:0005829:cytosol][GO:0005515:protein binding][GO:0005737:cytoplasm][GO:0042802:identical protein binding][GO:0016235:aggresome][GO:0070201:regulation of establishment of protein localizatio…	-	-
ENSMUSG00000052316	16	30269302	30283256	5310	-	Lrrc15	57.5984	92.9399	23.2348	1196	1267.15	1173.18	0.686034	1.11305	0.269439	13.2074	13.9029	12.8263	635.017	-4.35908	3.4262e-47	1.51331e-44	DOWN	leucine rich repeat containing 15 [Source:MGI Symbol;Acc:MGI:1921738]	[GO:0005515:protein binding][GO:0016020:membrane][GO:0016021:integral component of membrane][GO:0005615:extracellular space][GO:0009986:cell surface][GO:0031012:extracellular matrix][GO:0005518:collagen binding][GO:0062023:collagen-containing extracellular matrix][GO:1903077:negative regulation of protein localization to plasma membrane][GO:0043236:laminin binding][GO:0030335:positive regulation …	-	-
ENSMUSG00000026380	1	118627945	118685168	9747	+	Tfcp2l1	1329.13	1112.35	577.384	11435.1	9245.58	10441.2	9.06908	7.63161	3.83573	72.3415	58.1133	65.3953	5690.12	-3.36422	4.62259e-47	1.99876e-44	DOWN	transcription factor CP2-like 1 [Source:MGI Symbol;Acc:MGI:2444691]	[GO:0003700:DNA-binding transcription factor activity][GO:0006357:regulation of transcription by RNA polymerase II][GO:0003677:DNA binding][GO:0005634:nucleus][GO:0005634:nucleus][GO:0005634:nucleus][GO:0005737:cytoplasm][GO:0016020:membrane][GO:0003700:DNA-binding transcription factor activity][GO:0005739:mitochondrion][GO:0000122:negative regulation of transcription by RNA polymerase II][GO:004…	-	CP2
ENSMUSG00000081766	11	88972657	88973002	346	+	2210409E12Rik	89.8883	86.3536	98.7477	681.885	826.677	689.354	16.4307	15.8713	17.5739	115.562	139.198	115.664	412.151	-3.00308	1.4472e-46	6.19234e-44	DOWN	RIKEN cDNA 2210409E12 gene [Source:MGI Symbol;Acc:MGI:1919631]	-	-	-
ENSMUSG00000074365	7	15882617	15904020	6823	+	Crxos	24.4357	18.2953	22.073	468.119	335.139	473.612	0.688089	0.518007	0.605158	12.2216	8.69339	12.2417	223.612	-4.308	7.29804e-46	3.0281e-43	DOWN	cone-rod homeobox, opposite strand [Source:MGI Symbol;Acc:MGI:2451355]	[GO:0005634:nucleus][GO:0044212:transcription regulatory region DNA binding][GO:0003682:chromatin binding][GO:0006355:regulation of transcription, DNA-templated][GO:0001835:blastocyst hatching][GO:0048666:neuron development][GO:0005634:nucleus][GO:0044212:transcription regulatory region DNA binding][GO:0003682:chromatin binding][GO:0006355:regulation of transcription, DNA-templated][GO:0001835:bl…	-	Homeobox
ENSMUSG00000025584	7	81213596	81334533	5246	+	Pde8a	348.208	425.182	293.92	1990.63	1919.34	1942.96	5.79238	7.11163	4.76029	30.7015	29.4112	29.6676	1153.37	-2.45075	3.07925e-44	1.20463e-41	DOWN	phosphodiesterase 8A [Source:MGI Symbol;Acc:MGI:1277116]	[GO:0007165:signal transduction][GO:0004114:3',5'-cyclic-nucleotide phosphodiesterase activity][GO:0008081:phosphoric diester hydrolase activity][GO:0046872:metal ion binding][GO:0016787:hydrolase activity][GO:0001934:positive regulation of protein phosphorylation][GO:0060548:negative regulation of cell death][GO:0071364:cellular response to epidermal growth factor stimulus][GO:0019900:kinase bin…	[mmu00230:Purine metabolism][mmu05032:Morphine addiction]	-
ENSMUSG00000032224	9	70088511	70142560	5156	-	Fam81a	175.413	120.749	87.1304	1150.91	1212.88	1137.43	2.99598	2.07365	1.44888	18.225	19.0827	17.8321	647.419	-3.1841	1.69808e-43	6.4585e-41	DOWN	family with sequence similarity 81, member A [Source:MGI Symbol;Acc:MGI:1924136]	[GO:0003674:molecular_function][GO:0008150:biological_process][GO:0005575:cellular_component]	-	-
ENSMUSG00000017760	2	164832873	164841032	14817	+	Ctsa	1683.44	1661.21	1879.69	5944.84	6666.61	6759.5	29.2019	28.9744	31.7458	95.6103	106.528	107.629	4099.22	-1.89102	3.16658e-42	1.11174e-39	DOWN	cathepsin A [Source:MGI Symbol;Acc:MGI:97748]	[GO:0006508:proteolysis][GO:0004185:serine-type carboxypeptidase activity][GO:0016787:hydrolase activity][GO:0005654:nucleoplasm][GO:0005515:protein binding][GO:0008233:peptidase activity][GO:0043231:intracellular membrane-bounded organelle][GO:0005739:mitochondrion][GO:0004180:carboxypeptidase activity][GO:0005764:lysosome][GO:0051603:proteolysis involved in cellular protein catabolic process][G…	[mmu04142:Lysosome][mmu04614:Renin-angiotensin system]	-
ENSMUSG00000027775	3	67582741	67604237	3729	+	Mfsd1	1315.16	1255.05	1287.21	4342.96	4673.86	4474.42	27.6248	26.5069	26.3241	84.5776	90.4355	86.2694	2891.44	-1.80638	5.22661e-42	1.81944e-39	DOWN	major facilitator superfamily domain containing 1 [Source:MGI Symbol;Acc:MGI:1914118]	[GO:0016021:integral component of membrane][GO:0055085:transmembrane transport][GO:0016020:membrane][GO:0003674:molecular_function][GO:0008150:biological_process][GO:0005575:cellular_component]	-	-
ENSMUSG00000041718	X	144317804	144374450	23861	+	Alg13	2991.62	3103.61	1837.87	16777.4	14387.6	16382.4	45.3951	47.3528	27.1521	236.036	201.11	228.181	9246.75	-2.58264	8.46893e-42	2.82828e-39	DOWN	asparagine-linked glycosylation 13 [Source:MGI Symbol;Acc:MGI:1914824]	[GO:0016758:transferase activity, transferring hexosyl groups][GO:0006488:dolichol-linked oligosaccharide biosynthetic process][GO:0016740:transferase activity][GO:0016757:transferase activity, transferring glycosyl groups][GO:0016787:hydrolase activity][GO:0003824:catalytic activity][GO:0008152:metabolic process][GO:0008233:peptidase activity][GO:0008234:cysteine-type peptidase activity][GO:0006…	[mmu00510:N-Glycan biosynthesis]	-
ENSMUSG00000002885	8	83723251	83741326	14204	-	Adgre5	272.283	272.965	256.744	1248.32	1242.67	1196.16	5.74023	5.78619	5.26982	24.3997	24.1329	23.1472	748.19	-2.19979	3.69522e-41	1.19519e-38	DOWN	adhesion G protein-coupled receptor E5 [Source:MGI Symbol;Acc:MGI:1347095]	[GO:0007186:G protein-coupled receptor signaling pathway][GO:0016021:integral component of membrane][GO:0004930:G protein-coupled receptor activity][GO:0005509:calcium ion binding][GO:0007166:cell surface receptor signaling pathway][GO:0004888:transmembrane signaling receptor activity][GO:0016020:membrane][GO:0007186:G protein-coupled receptor signaling pathway][GO:0016021:integral component of m…	-	-
ENSMUSG00000031584	8	33652523	33698163	3738	+	Gsr	1089.13	1190.66	1179.16	4022.76	4272.76	4000.81	25.7698	28.3266	27.1639	88.2482	93.1286	86.8919	2625.88	-1.82989	4.321e-41	1.38667e-38	DOWN	glutathione reductase [Source:MGI Symbol;Acc:MGI:95804]	[GO:0009055:electron transfer activity][GO:0050660:flavin adenine dinucleotide binding][GO:0055114:oxidation-reduction process][GO:0016491:oxidoreductase activity][GO:0050661:NADP binding][GO:0045454:cell redox homeostasis][GO:0004362:glutathione-disulfide reductase activity][GO:0006749:glutathione metabolic process][GO:0016668:oxidoreductase activity, acting on a sulfur group of donors, NAD(P) a…	[mmu00480:Glutathione metabolism][mmu04918:Thyroid hormone synthesis]	-
ENSMUSG00000030342	6	125460266	125494791	2918	-	Cd9	1537.7	1569.73	1713.56	5452.37	5705.88	5392.28	79.1961	81.2895	85.9248	260.356	270.706	254.921	3561.92	-1.78	1.68489e-40	5.28321e-38	DOWN	CD9 antigen [Source:MGI Symbol;Acc:MGI:88348]	[GO:0016021:integral component of membrane][GO:0016020:membrane][GO:0016020:membrane][GO:0009897:external side of plasma membrane][GO:0005886:plasma membrane][GO:0005886:plasma membrane][GO:0009986:cell surface][GO:0005515:protein binding][GO:0005887:integral component of plasma membrane][GO:0005886:plasma membrane][GO:0005576:extracellular region][GO:0016324:apical plasma membrane][GO:0007155:ce…	-	-
ENSMUSG00000039678	2	30133746	30152013	7046	+	Tbc1d13	1014.08	737.665	921.258	3972.25	3816.33	3764.64	17.8403	13.0487	15.7797	64.7915	61.8473	60.7932	2371.04	-2.11282	5.97317e-40	1.83104e-37	DOWN	TBC1 domain family, member 13 [Source:MGI Symbol;Acc:MGI:2385326]	[GO:0016020:membrane][GO:0016020:membrane][GO:0005096:GTPase activator activity][GO:0005096:GTPase activator activity][GO:0005515:protein binding][GO:0005737:cytoplasm][GO:0005096:GTPase activator activity][GO:0005829:cytosol][GO:0017137:Rab GTPase binding][GO:0006886:intracellular protein transport][GO:0017137:Rab GTPase binding][GO:0006886:intracellular protein transport][GO:0090630:activation …	-	-
ENSMUSG00000038668	4	58435255	58553898	18460	-	Lpar1	98.6154	100.99	91.7773	704.434	596.867	652.333	1.76037	1.81265	1.59507	11.6587	9.81477	10.6888	374.169	-2.74257	1.05863e-39	3.22112e-37	DOWN	lysophosphatidic acid receptor 1 [Source:MGI Symbol;Acc:MGI:108429]	[GO:0007186:G protein-coupled receptor signaling pathway][GO:0016021:integral component of membrane][GO:0004930:G protein-coupled receptor activity][GO:0070915:lysophosphatidic acid receptor activity][GO:0016020:membrane][GO:0005886:plasma membrane][GO:0009986:cell surface][GO:0005737:cytoplasm][GO:0007165:signal transduction][GO:0007186:G protein-coupled receptor signaling pathway][GO:0005886:pl…	-	-
ENSMUSG00000002227	3	104794836	104818563	21692	-	Mov10	2004.6	1706.58	1603.2	6461.67	6482.55	6551.42	34.0995	29.1894	26.5518	101.91	101.58	102.296	4135	-1.87476	1.98175e-39	5.94193e-37	DOWN	Moloney leukemia virus 10 [Source:MGI Symbol;Acc:MGI:97054]	[GO:0003723:RNA binding][GO:0032575:ATP-dependent 5'-3' RNA helicase activity][GO:0035194:posttranscriptional gene silencing by RNA][GO:0003723:RNA binding][GO:0032575:ATP-dependent 5'-3' RNA helicase activity][GO:0035194:posttranscriptional gene silencing by RNA][GO:0003723:RNA binding][GO:0032575:ATP-dependent 5'-3' RNA helicase activity][GO:0035194:posttranscriptional gene silencing by RNA][GO…	-	-
ENSMUSG00000064351	MT	5328	6872	1545	+	mt-Co1	58332.3	77844.1	69949.4	307745	253386	351849	2387.87	3204.09	2787.87	11680	9554.96	13220.8	186518	-2.14705	1.76577e-38	5.14414e-36	DOWN	mitochondrially encoded cytochrome c oxidase I [Source:MGI Symbol;Acc:MGI:102504]	[GO:0016021:integral component of membrane][GO:0055114:oxidation-reduction process][GO:0004129:cytochrome-c oxidase activity][GO:0020037:heme binding][GO:0009060:aerobic respiration][GO:0045277:respiratory chain complex IV][GO:0016020:membrane][GO:0046872:metal ion binding][GO:0016491:oxidoreductase activity][GO:0022900:electron transport chain][GO:0005739:mitochondrion][GO:0005743:mitochondrial …	[mmu00190:Oxidative phosphorylation][mmu04260:Cardiac muscle contraction][mmu04932:Non-alcoholic fatty liver disease (NAFLD)][mmu05010:Alzheimer's disease][mmu05012:Parkinson's disease][mmu05016:Huntington's disease]	-
ENSMUSG00000034690	7	6045161	6105150	10449	+	Nlrp4c	78.5432	90.7445	68.5425	595.296	553.246	585.951	1.37414	1.59632	1.16753	9.65618	8.91628	9.40987	328.72	-2.85775	3.02657e-38	8.69389e-36	DOWN	NLR family, pyrin domain containing 4C [Source:MGI Symbol;Acc:MGI:1890518]	[GO:0005515:protein binding][GO:0003674:molecular_function][GO:0008150:biological_process][GO:0000166:nucleotide binding][GO:0005524:ATP binding][GO:0006954:inflammatory response][GO:0005515:protein binding][GO:0003674:molecular_function][GO:0008150:biological_process][GO:0000166:nucleotide binding][GO:0005524:ATP binding][GO:0006954:inflammatory response][GO:0005515:protein binding][GO:0003674:m…	-	-
ENSMUSG00000029304	5	104435118	104441050	7441	+	Spp1	3426.23	4174.98	4091.64	12883.7	13858.8	13736	143.791	176.176	167.186	501.31	535.78	529.149	8695.22	-1.79154	4.14941e-38	1.18365e-35	DOWN	secreted phosphoprotein 1 [Source:MGI Symbol;Acc:MGI:98389]	[GO:0007155:cell adhesion][GO:0001503:ossification][GO:0005178:integrin binding][GO:0006710:androgen catabolic process][GO:0033280:response to vitamin D][GO:0045893:positive regulation of transcription, DNA-templated][GO:0071394:cellular response to testosterone stimulus][GO:2000866:positive regulation of estradiol secretion][GO:0005615:extracellular space][GO:0005794:Golgi apparatus][GO:0007155:…	-	-
ENSMUSG00000046323	6	122626410	122630272	1524	+	Dppa3	655.399	706.929	985.154	3885.66	3669.51	3651.02	49.7612	53.9681	72.8242	273.527	256.647	254.449	2258.95	-2.25756	1.05021e-37	2.91483e-35	DOWN	developmental pluripotency-associated 3 [Source:MGI Symbol;Acc:MGI:1920958]	[GO:0035064:methylated histone binding][GO:0005634:nucleus][GO:0005634:nucleus][GO:0035064:methylated histone binding][GO:0005634:nucleus][GO:0005737:cytoplasm][GO:0005737:cytoplasm][GO:0007275:multicellular organism development][GO:0005515:protein binding][GO:0006325:chromatin organization][GO:0035064:methylated histone binding][GO:0040016:embryonic cleavage][GO:0001939:female pronucleus][GO:000…	-	-
ENSMUSG00000015053	6	88193891	88207032	9693	+	Gata2	76.7978	36.5905	63.8956	572.747	626.657	691.907	1.36016	0.651607	1.10179	9.40489	10.2238	11.2483	344.766	-3.42581	1.78006e-37	4.90734e-35	DOWN	GATA binding protein 2 [Source:MGI Symbol;Acc:MGI:95662]	[GO:0008270:zinc ion binding][GO:0006355:regulation of transcription, DNA-templated][GO:0005634:nucleus][GO:0003700:DNA-binding transcription factor activity][GO:0043565:sequence-specific DNA binding][GO:0030097:hemopoiesis][GO:0046872:metal ion binding][GO:0048873:homeostasis of number of cells within a tissue][GO:0048873:homeostasis of number of cells within a tissue][GO:0003677:DNA binding][GO…	-	zf-GATA
ENSMUSG00000027702	3	30624267	30647869	1891	-	Lrrc34	70.6889	76.1083	73.1895	579.963	476.642	575.738	2.36423	2.55945	2.38327	17.9841	14.685	17.6752	308.722	-2.89044	1.81703e-37	4.97587e-35	DOWN	leucine rich repeat containing 34 [Source:MGI Symbol;Acc:MGI:1919077]	[GO:0005515:protein binding][GO:0003674:molecular_function][GO:0008150:biological_process][GO:0005575:cellular_component][GO:0005634:nucleus][GO:0005737:cytoplasm][GO:0030154:cell differentiation][GO:0005730:nucleolus]	-	-
ENSMUSG00000064367	MT	11742	13565	1824	+	mt-Nd5	9856.3	14227.1	10613.6	72747	49812.3	85648.4	341.758	496.02	358.308	2338.68	1591.06	2726	40484.1	-2.58505	1.9655e-37	5.3468e-35	DOWN	mitochondrially encoded NADH dehydrogenase 5 [Source:MGI Symbol;Acc:MGI:102496]	[GO:0055114:oxidation-reduction process][GO:0008137:NADH dehydrogenase (ubiquinone) activity][GO:0042773:ATP synthesis coupled electron transport][GO:0016020:membrane][GO:0016021:integral component of membrane][GO:0016491:oxidoreductase activity][GO:0043005:neuron projection][GO:0005739:mitochondrion][GO:0005743:mitochondrial inner membrane][GO:0005739:mitochondrion][GO:0070469:respirasome][GO:00…	[mmu00190:Oxidative phosphorylation][mmu05012:Parkinson's disease]	-
ENSMUSG00000044250	15	97247107	97385680	4426	+	Pced1b	324.645	314.678	250.935	1396.24	1356.52	1350.62	9.39696	9.15846	7.07175	37.4705	36.1699	35.8851	832.273	-2.2009	3.08677e-37	8.28728e-35	DOWN	PC-esterase domain containing 1B [Source:MGI Symbol;Acc:MGI:2446270]	[GO:0003674:molecular_function][GO:0008150:biological_process][GO:0005575:cellular_component][GO:0003674:molecular_function][GO:0008150:biological_process][GO:0005575:cellular_component]	-	-
ENSMUSG00000039168	15	31224314	31274341	3354	+	Dap	364.79	281.015	375.241	1496.36	1671.44	1649.34	14.8369	11.4923	14.8593	56.4269	62.6231	61.576	973.031	-2.24119	3.11236e-37	8.30172e-35	DOWN	death-associated protein [Source:MGI Symbol;Acc:MGI:1918190]	[GO:0005575:cellular_component][GO:0006914:autophagy][GO:0045892:negative regulation of transcription, DNA-templated][GO:0006915:apoptotic process][GO:0006915:apoptotic process][GO:0032088:negative regulation of NF-kappaB transcription factor activity][GO:0006919:activation of cysteine-type endopeptidase activity involved in apoptotic process][GO:0034198:cellular response to amino acid starvation…	-	-
ENSMUSG00000006818	17	13006846	13040063	13873	+	Sod2	1103.1	976.967	1023.49	3680.01	3691.85	3380.39	11.9034	10.6002	10.753	36.8178	36.6983	33.4831	2309.3	-1.79296	3.93428e-37	1.03595e-34	DOWN	superoxide dismutase 2, mitochondrial [Source:MGI Symbol;Acc:MGI:98352]	[GO:0046872:metal ion binding][GO:0055114:oxidation-reduction process][GO:0004784:superoxide dismutase activity][GO:0006801:superoxide metabolic process][GO:0019430:removal of superoxide radicals][GO:0046872:metal ion binding][GO:0055114:oxidation-reduction process][GO:0004784:superoxide dismutase activity][GO:0006801:superoxide metabolic process][GO:0005737:cytoplasm][GO:0051260:protein homoolig…	[mmu04146:Peroxisome][mmu05016:Huntington's disease]	-
ENSMUSG00000064370	MT	14145	15288	1144	+	mt-Cytb	14957.2	20219.9	19262.8	96895.3	69769.6	109180	826.905	1123.98	1036.83	4966.58	3553.15	5540.47	55047.4	-2.34111	4.40104e-37	1.14419e-34	DOWN	mitochondrially encoded cytochrome b [Source:MGI Symbol;Acc:MGI:102501]	[GO:0009055:electron transfer activity][GO:0016020:membrane][GO:0016491:oxidoreductase activity][GO:0006122:mitochondrial electron transport, ubiquinol to cytochrome c][GO:0008121:ubiquinol-cytochrome-c reductase activity][GO:0022904:respiratory electron transport chain][GO:0045275:respiratory chain complex III][GO:0016021:integral component of membrane][GO:0046872:metal ion binding][GO:0032991:p…	-	-
ENSMUSG00000051176	8	43295063	43306980	5353	-	Zfp42	953.864	905.249	999.095	3124.4	3250.32	3132.73	32.8403	31.3376	33.4899	99.7329	103.084	99.0022	2060.94	-1.7347	5.01289e-36	1.24797e-33	DOWN	zinc finger protein 42 [Source:MGI Symbol;Acc:MGI:99187]	[GO:0003676:nucleic acid binding][GO:0008584:male gonad development][GO:0008585:female gonad development][GO:0005737:cytoplasm][GO:0003676:nucleic acid binding][GO:0003676:nucleic acid binding]	-	zf-C2H2
ENSMUSG00000005672	5	75574916	75656722	18970	+	Kit	610.019	663.02	317.154	4029.07	3486.51	3760.81	7.36138	8.04488	3.72626	45.0787	38.7571	41.658	2144.43	-2.82243	6.07456e-36	1.50316e-33	DOWN	KIT proto-oncogene receptor tyrosine kinase [Source:MGI Symbol;Acc:MGI:96677]	[GO:0005524:ATP binding][GO:0006468:protein phosphorylation][GO:0004672:protein kinase activity][GO:0007169:transmembrane receptor protein tyrosine kinase signaling pathway][GO:0004714:transmembrane receptor protein tyrosine kinase activity][GO:0004713:protein tyrosine kinase activity][GO:0019955:cytokine binding][GO:0038093:Fc receptor signaling pathway][GO:0038109:Kit signaling pathway][GO:0016…	[mmu04060:Cytokine-cytokine receptor interaction][mmu04144:Endocytosis][mmu04151:PI3K-Akt signaling pathway][mmu04640:Hematopoietic cell lineage][mmu04916:Melanogenesis][mmu05200:Pathways in cancer][mmu05221:Acute myeloid leukemia]	-
ENSMUSG00000039395	1	72159442	72212307	2284	-	Mreg	1342.22	1227.25	1017.68	4458.41	4380.22	4520.38	37.1669	34.1698	27.4368	114.463	111.731	114.897	2824.36	-1.89578	6.29147e-36	1.54751e-33	DOWN	melanoregulin [Source:MGI Symbol;Acc:MGI:2151839]	[GO:0042470:melanosome][GO:0032402:melanosome transport][GO:0016020:membrane][GO:0005886:plasma membrane][GO:0032991:protein-containing complex][GO:0005515:protein binding][GO:0030659:cytoplasmic vesicle membrane][GO:0030659:cytoplasmic vesicle membrane][GO:0031410:cytoplasmic vesicle][GO:0008289:lipid binding][GO:0005764:lysosome][GO:0005765:lysosomal membrane][GO:0031902:late endosome membrane]…	-	-
ENSMUSG00000031232	X	105968084	106011906	15837	-	Magt1	658.89	649.848	650.573	2312.64	2155.53	2471.46	9.19706	9.12062	8.84135	29.9291	27.7162	31.6658	1483.16	-1.82429	1.69374e-35	4.11679e-33	DOWN	magnesium transporter 1 [Source:MGI Symbol;Acc:MGI:1914325]	[GO:0016020:membrane][GO:0016021:integral component of membrane][GO:0005886:plasma membrane][GO:0005783:endoplasmic reticulum][GO:0005783:endoplasmic reticulum][GO:0005789:endoplasmic reticulum membrane][GO:0015095:magnesium ion transmembrane transporter activity][GO:1903830:magnesium ion transmembrane transport][GO:0006486:protein glycosylation][GO:0050890:cognition][GO:0006487:protein N-linked …	-	-
ENSMUSG00000067702	6	125278274	125286042	1509	-	Tuba3a	795.032	808.65	1049.05	3421.15	3501.41	3463.37	33.3216	34.0783	42.8078	132.942	135.185	133.242	2173.11	-1.97099	1.75208e-35	4.23354e-33	DOWN	tubulin, alpha 3A [Source:MGI Symbol;Acc:MGI:1095406]	[GO:0005525:GTP binding][GO:0007017:microtubule-based process][GO:0005874:microtubule][GO:0003924:GTPase activity][GO:0005200:structural constituent of cytoskeleton][GO:0003674:molecular_function][GO:0008150:biological_process][GO:0015630:microtubule cytoskeleton][GO:0005737:cytoplasm][GO:0000166:nucleotide binding][GO:0005856:cytoskeleton][GO:0007010:cytoskeleton organization][GO:0000226:microtu…	-	-
ENSMUSG00000022900	16	36693978	36726804	11515	+	Ildr1	275.774	376.882	297.405	1490.04	1410.78	1502.54	5.73355	7.87868	6.02013	28.7224	27.0192	28.6745	892.236	-2.20964	2.20577e-35	5.26782e-33	DOWN	immunoglobulin-like domain containing receptor 1 [Source:MGI Symbol;Acc:MGI:2146574]	[GO:0016020:membrane][GO:0016021:integral component of membrane][GO:0005886:plasma membrane][GO:0032991:protein-containing complex][GO:0005829:cytosol][GO:0051260:protein homooligomerization][GO:0042802:identical protein binding][GO:0005886:plasma membrane][GO:0005886:plasma membrane][GO:0006897:endocytosis][GO:1990830:cellular response to leukemia inhibitory factor][GO:0090277:positive regulatio…	-	-
ENSMUSG00000003051	1	135253575	135258568	4531	-	Elf3	849.139	655.702	934.037	3373.35	3226.91	3542.51	25.6345	19.9035	27.4534	94.4186	89.7381	98.1654	2096.94	-2.05812	6.22311e-35	1.44422e-32	DOWN	E74-like factor 3 [Source:MGI Symbol;Acc:MGI:1101781]	[GO:0006355:regulation of transcription, DNA-templated][GO:0005634:nucleus][GO:0006954:inflammatory response][GO:0003700:DNA-binding transcription factor activity][GO:0043565:sequence-specific DNA binding][GO:0006366:transcription by RNA polymerase II][GO:0030855:epithelial cell differentiation][GO:0003677:DNA binding][GO:0005634:nucleus][GO:0005654:nucleoplasm][GO:0005794:Golgi apparatus][GO:000…	-	ETS
ENSMUSG00000030513	7	65861734	66050386	14229	+	Pcsk6	336.863	336.633	369.433	1628.95	1477.8	1302.11	4.83657	4.85979	5.16424	21.6841	19.5454	17.1606	908.632	-2.08189	8.48378e-35	1.92535e-32	DOWN	proprotein convertase subtilisin/kexin type 6 [Source:MGI Symbol;Acc:MGI:102897]	[GO:0006508:proteolysis][GO:0004252:serine-type endopeptidase activity][GO:0005615:extracellular space][GO:0005615:extracellular space][GO:0008201:heparin binding][GO:0009986:cell surface][GO:0062023:collagen-containing extracellular matrix][GO:0016020:membrane][GO:0004252:serine-type endopeptidase activity][GO:0016485:protein processing][GO:0016485:protein processing][GO:0004175:endopeptidase ac…	-	-
ENSMUSG00000042386	X	140808307	140813433	3408	-	Tex13b	92.5064	84.89	61.5721	603.414	540.478	569.355	2.76494	2.55122	1.79178	16.7217	14.8812	15.6206	325.369	-2.83212	1.05423e-34	2.36638e-32	DOWN	testis expressed 13B [Source:MGI Symbol;Acc:MGI:1890544]	[GO:0003674:molecular_function][GO:0008150:biological_process][GO:0005575:cellular_component]	-	-
ENSMUSG00000029120	5	36868513	36955078	5002	+	Ppp2r2c	260.065	260.524	228.862	1073.34	1049.04	1065.95	4.02348	4.0527	3.44731	15.3959	14.9505	15.1375	656.296	-2.08636	2.64126e-34	5.86459e-32	DOWN	protein phosphatase 2, regulatory subunit B, gamma [Source:MGI Symbol;Acc:MGI:2442660]	[GO:0019888:protein phosphatase regulator activity][GO:0000159:protein phosphatase type 2A complex][GO:0005515:protein binding][GO:0005829:cytosol][GO:0043666:regulation of phosphoprotein phosphatase activity][GO:0000278:mitotic cell cycle][GO:0000159:protein phosphatase type 2A complex][GO:0004722:protein serine/threonine phosphatase activity][GO:0070262:peptidyl-serine dephosphorylation][GO:001…	-	-
ENSMUSG00000074637	3	34650405	34652461	2057	+	Sox2	2481.97	2476.45	2020.26	7535.91	7866.73	7811.4	76.3117	76.5599	60.477	214.824	222.809	220.458	5032.12	-1.73328	2.99425e-34	6.61262e-32	DOWN	SRY (sex determining region Y)-box 2 [Source:MGI Symbol;Acc:MGI:98364]	[GO:0003677:DNA binding][GO:0006355:regulation of transcription, DNA-templated][GO:0005634:nucleus][GO:0005515:protein binding][GO:0000976:transcription regulatory region sequence-specific DNA binding][GO:0001228:DNA-binding transcription activator activity, RNA polymerase II-specific][GO:0003700:DNA-binding transcription factor activity][GO:0035198:miRNA binding][GO:0043565:sequence-specific DNA…	-	HMG
ENSMUSG00000024900	19	3322334	3385733	11840	+	Cpt1a	575.984	541.54	429.843	2011.38	2055.52	2231.46	8.43836	7.97728	6.13119	27.3208	27.7405	30.0081	1307.62	-2.02248	8.56235e-34	1.86093e-31	DOWN	carnitine palmitoyltransferase 1a, liver [Source:MGI Symbol;Acc:MGI:1098296]	[GO:0016746:transferase activity, transferring acyl groups][GO:0016746:transferase activity, transferring acyl groups][GO:0016020:membrane][GO:0016021:integral component of membrane][GO:0016740:transferase activity][GO:0051260:protein homooligomerization][GO:0042802:identical protein binding][GO:0006629:lipid metabolic process][GO:0005739:mitochondrion][GO:0043231:intracellular membrane-bounded o…	[mmu00071:Fatty acid degradation][mmu03320:PPAR signaling pathway][mmu04920:Adipocytokine signaling pathway]	-
ENSMUSG00000064145	9	108602942	108649386	17186	-	Arih2	1420.76	1478.99	1425.45	4586.49	4331.27	4262.51	22.8993	23.9686	22.3687	68.5381	64.3073	63.0619	2917.58	-1.60748	9.78845e-34	2.10513e-31	DOWN	ariadne RBR E3 ubiquitin protein ligase 2 [Source:MGI Symbol;Acc:MGI:1344361]	[GO:0004842:ubiquitin-protein transferase activity][GO:0016567:protein ubiquitination][GO:0016740:transferase activity][GO:0046872:metal ion binding][GO:0005634:nucleus][GO:0005634:nucleus][GO:0005634:nucleus][GO:0005654:nucleoplasm][GO:0005737:cytoplasm][GO:0005737:cytoplasm][GO:0005737:cytoplasm][GO:0000209:protein polyubiquitination][GO:0006511:ubiquitin-dependent protein catabolic process][GO…	-	-
ENSMUSG00000054626	X	53777118	53797706	3876	-	Xlr	26.1811	24.1497	40.6608	406.786	311.733	559.143	0.890234	0.82567	1.34611	12.8243	9.76435	17.4518	228.109	-3.83313	1.54461e-33	3.23713e-31	DOWN	X-linked lymphocyte-regulated [Source:MGI Symbol;Acc:MGI:98976]	[GO:0003674:molecular_function][GO:0007283:spermatogenesis][GO:0007286:spermatid development][GO:0051321:meiotic cell cycle][GO:0000795:synaptonemal complex][GO:0003674:molecular_function][GO:0007283:spermatogenesis][GO:0007286:spermatid development][GO:0051321:meiotic cell cycle][GO:0000795:synaptonemal complex]	-	-
ENSMUSG00000068048	X	37899097	37901770	3304	-	Rhox9	206.83	226.861	397.314	1818.36	1954.45	1736.15	5.40095	5.95652	10.1013	44.0237	47.0136	41.6144	1056.66	-2.7357	1.85188e-33	3.86141e-31	DOWN	reproductive homeobox 9 [Source:MGI Symbol;Acc:MGI:1890128]	[GO:0003677:DNA binding][GO:0008150:biological_process][GO:0005575:cellular_component][GO:0005634:nucleus][GO:0003677:DNA binding][GO:0008150:biological_process][GO:0005575:cellular_component][GO:0005634:nucleus]	-	Homeobox
ENSMUSG00000004359	10	88674772	88685015	6055	-	Spic	0	4.39086	0	435.649	367.057	384.251	0	0.121933	0	11.1553	9.33839	9.74115	198.558	-7.82066	2.50621e-33	5.19937e-31	DOWN	Spi-C transcription factor (Spi-1/PU.1 related) [Source:MGI Symbol;Acc:MGI:1341168]	[GO:0006355:regulation of transcription, DNA-templated][GO:0003700:DNA-binding transcription factor activity][GO:0043565:sequence-specific DNA binding][GO:0003677:DNA binding][GO:0005634:nucleus][GO:0005634:nucleus][GO:0045944:positive regulation of transcription by RNA polymerase II][GO:0000981:DNA-binding transcription factor activity, RNA polymerase II-specific][GO:0030154:cell differentiation…	-	ETS
ENSMUSG00000060586	17	34305867	34316674	5502	+	H2-Eb1	156.214	211.493	260.229	1065.22	1274.59	1254.88	5.91961	8.05836	9.601	37.4251	44.4927	43.6492	703.771	-2.52141	2.94768e-33	6.08452e-31	DOWN	histocompatibility 2, class II antigen E beta [Source:MGI Symbol;Acc:MGI:95901]	[GO:0016020:membrane][GO:0006955:immune response][GO:0019882:antigen processing and presentation][GO:0042613:MHC class II protein complex][GO:0016020:membrane][GO:0006955:immune response][GO:0019882:antigen processing and presentation][GO:0042613:MHC class II protein complex][GO:0016021:integral component of membrane][GO:0002376:immune system process][GO:0002250:adaptive immune response][GO:00025…	-	-
ENSMUSG00000035493	13	56609523	56639562	7846	+	Tgfbi	36.6535	43.1768	38.3374	335.531	404.295	356.166	0.771952	0.914328	0.78611	6.55175	7.84362	6.88538	202.36	-3.20874	3.59337e-33	7.27118e-31	DOWN	transforming growth factor, beta induced [Source:MGI Symbol;Acc:MGI:99959]	[GO:0007155:cell adhesion][GO:0005518:collagen binding][GO:0050840:extracellular matrix binding][GO:0008283:cell population proliferation][GO:0005178:integrin binding][GO:0005515:protein binding][GO:0007155:cell adhesion][GO:0008283:cell population proliferation][GO:0005178:integrin binding][GO:0050840:extracellular matrix binding][GO:0005518:collagen binding][GO:0005615:extracellular space][GO:0…	-	-
ENSMUSG00000026980	2	60292103	60383303	12073	-	Ly75	521.003	525.44	286.949	2852.01	2416.19	2602.95	4.77484	4.84192	2.56041	24.2337	20.3983	21.897	1534.09	-2.55752	7.62173e-33	1.51979e-30	DOWN	lymphocyte antigen 75 [Source:MGI Symbol;Acc:MGI:106662]	[GO:0016020:membrane][GO:0016021:integral component of membrane][GO:0016020:membrane][GO:0016021:integral component of membrane][GO:0009897:external side of plasma membrane][GO:0030246:carbohydrate binding][GO:0006897:endocytosis][GO:0004888:transmembrane signaling receptor activity]	-	-
ENSMUSG00000076441	2	31470207	31520672	3305	+	Ass1	3400.05	3288.76	3652.5	9620.35	10876.6	10397.8	126.791	123.314	132.612	332.618	373.629	355.914	6872.67	-1.57915	8.54968e-33	1.69659e-30	DOWN	argininosuccinate synthetase 1 [Source:MGI Symbol;Acc:MGI:88090]	[GO:0005524:ATP binding][GO:0004055:argininosuccinate synthase activity][GO:0006526:arginine biosynthetic process][GO:0005634:nucleus][GO:0005829:cytosol][GO:0005737:cytoplasm][GO:0005737:cytoplasm][GO:0000166:nucleotide binding][GO:0042802:identical protein binding][GO:0005783:endoplasmic reticulum][GO:0043005:neuron projection][GO:0005737:cytoplasm][GO:0005515:protein binding][GO:0016874:ligase…	[mmu00250:Alanine, aspartate and glutamate metabolism][mmu00330:Arginine and proline metabolism]	-
ENSMUSG00000073568	18	46921815	46934232	4426	+	Arl14epl	395.334	431.036	386.859	1655.1	1487.38	1441.26	11.078	12.1448	10.5545	43.0006	38.3941	37.0716	966.162	-1.91679	9.38854e-33	1.8541e-30	DOWN	ADP-ribosylation factor-like 14 effector protein-like [Source:MGI Symbol;Acc:MGI:2685795]	[GO:0003674:molecular_function][GO:0008150:biological_process][GO:0005575:cellular_component]	-	-
ENSMUSG00000030672	7	127208890	127214298	2603	+	Mylpf	758.378	548.126	843.422	3025.19	3458.85	3058.69	62.6163	45.5049	67.8005	231.582	263.073	231.813	1948.78	-2.15247	1.14235e-32	2.24519e-30	DOWN	myosin light chain, phosphorylatable, fast skeletal muscle [Source:MGI Symbol;Acc:MGI:97273]	[GO:0005509:calcium ion binding][GO:0005509:calcium ion binding][GO:0005509:calcium ion binding][GO:0046872:metal ion binding][GO:0016459:myosin complex][GO:0007519:skeletal muscle tissue development][GO:0008307:structural constituent of muscle][GO:0006955:immune response][GO:0007519:skeletal muscle tissue development][GO:0005509:calcium ion binding]	-	-
ENSMUSG00000031432	X	140456613	140476140	2428	+	Prps1	2800.5	2945.54	2898.54	8378.34	7906.09	8269.7	90.137	95.3254	90.8307	250.021	234.408	244.319	5533.12	-1.50609	1.49281e-32	2.92002e-30	DOWN	phosphoribosyl pyrophosphate synthetase 1 [Source:MGI Symbol;Acc:MGI:97775]	[GO:0000287:magnesium ion binding][GO:0009116:nucleoside metabolic process][GO:0004749:ribose phosphate diphosphokinase activity][GO:0009156:ribonucleoside monophosphate biosynthetic process][GO:0044249:cellular biosynthetic process][GO:0009165:nucleotide biosynthetic process][GO:0016740:transferase activity][GO:0046872:metal ion binding][GO:0032991:protein-containing complex][GO:0000166:nucleoti…	[mmu00030:Pentose phosphate pathway][mmu00230:Purine metabolism]	-
ENSMUSG00000015937	13	56073619	56136361	11703	-	H2afy	1455.67	1362.63	1675.23	4701.04	4939.84	4839.52	22.913	21.5663	25.6732	68.6064	71.6271	69.9235	3162.32	-1.68916	3.37072e-32	6.47004e-30	DOWN	H2A histone family, member Y [Source:MGI Symbol;Acc:MGI:1349392]	[GO:0003677:DNA binding][GO:0005634:nucleus][GO:0000786:nucleosome][GO:0006334:nucleosome assembly][GO:0046982:protein heterodimerization activity][GO:0005634:nucleus][GO:0005634:nucleus][GO:0003677:DNA binding][GO:0006325:chromatin organization][GO:0000790:nuclear chromatin][GO:0005694:chromosome][GO:0003682:chromatin binding][GO:0000977:RNA polymerase II regulatory region sequence-specific DNA …	-	-
ENSMUSG00000001270	12	111669361	111672338	6425	-	Ckb	1556.9	1425.57	2221.24	6892.81	8136.97	7625.02	34.6837	31.9322	48.1778	142.368	166.983	155.922	4643.08	-2.12341	4.90506e-32	9.32802e-30	DOWN	creatine kinase, brain [Source:MGI Symbol;Acc:MGI:88407]	[GO:0003824:catalytic activity][GO:0016772:transferase activity, transferring phosphorus-containing groups][GO:0016301:kinase activity][GO:0016740:transferase activity][GO:0005615:extracellular space][GO:0005634:nucleus][GO:0005829:cytosol][GO:0005515:protein binding][GO:0005737:cytoplasm][GO:0000166:nucleotide binding][GO:0005524:ATP binding][GO:0016310:phosphorylation][GO:0005739:mitochondrion]…	[mmu00330:Arginine and proline metabolism]	-
ENSMUSG00000030798	7	45233632	45239115	9627	-	Cd37	82.9067	68.0584	127.791	631.375	706.452	731.481	2.06355	1.70327	3.0968	14.5701	16.1976	16.712	391.344	-2.90728	5.36334e-32	1.01525e-29	DOWN	CD37 antigen [Source:MGI Symbol;Acc:MGI:88330]	[GO:0016021:integral component of membrane][GO:0016020:membrane][GO:0001772:immunological synapse][GO:0005887:integral component of plasma membrane][GO:0050688:regulation of defense response to virus][GO:0042832:defense response to protozoan][GO:0008285:negative regulation of cell population proliferation][GO:0002639:positive regulation of immunoglobulin production][GO:0030886:negative regulation…	-	-
ENSMUSG00000074653	3	30679058	30699843	7397	-	Lrrc31	23.563	70.2538	38.3374	622.355	556.437	536.164	0.453792	1.36042	0.718846	11.1126	9.87159	9.47819	307.852	-3.68149	5.77386e-32	1.08795e-29	DOWN	leucine rich repeat containing 31 [Source:MGI Symbol;Acc:MGI:2443864]	[GO:0005515:protein binding][GO:0003674:molecular_function][GO:0008150:biological_process][GO:0005575:cellular_component][GO:0005515:protein binding][GO:0003674:molecular_function][GO:0008150:biological_process][GO:0005575:cellular_component]	-	-
ENSMUSG00000015568	8	68880491	68907448	13243	+	Lpl	165.813	100.258	148.702	788.316	857.531	842.544	2.54847	1.54937	2.22518	11.2334	12.141	11.8865	483.861	-2.5903	8.78996e-32	1.6412e-29	DOWN	lipoprotein lipase [Source:MGI Symbol;Acc:MGI:96820]	[GO:0005515:protein binding][GO:0052689:carboxylic ester hydrolase activity][GO:0006629:lipid metabolic process][GO:0004465:lipoprotein lipase activity][GO:0010744:positive regulation of macrophage derived foam cell differentiation][GO:0050729:positive regulation of inflammatory response][GO:0005615:extracellular space][GO:0031670:cellular response to nutrient][GO:0071398:cellular response to fat…	[mmu00561:Glycerolipid metabolism][mmu03320:PPAR signaling pathway][mmu05010:Alzheimer's disease]	-
ENSMUSG00000022040	14	66084374	66124500	6052	-	Ephx2	998.371	990.871	1126.89	3174.01	3613.12	3320.39	31.0283	30.9642	34.0983	91.4586	103.441	94.723	2203.94	-1.69847	9.77341e-32	1.81657e-29	DOWN	epoxide hydrolase 2, cytoplasmic [Source:MGI Symbol;Acc:MGI:99500]	[GO:0016787:hydrolase activity][GO:0003824:catalytic activity][GO:0046872:metal ion binding][GO:0008152:metabolic process][GO:0005829:cytosol][GO:0005737:cytoplasm][GO:0042803:protein homodimerization activity][GO:0006629:lipid metabolic process][GO:0010628:positive regulation of gene expression][GO:0006954:inflammatory response][GO:0042632:cholesterol homeostasis][GO:0000287:magnesium ion bindin…	[mmu00590:Arachidonic acid metabolism][mmu04146:Peroxisome]	-
ENSMUSG00000024042	17	31844250	31855804	8228	-	Sik1	916.337	971.844	658.705	3645.74	3485.45	3275.71	12.8189	13.67	8.97167	47.2859	44.9157	42.0631	2158.96	-2.02869	1.10578e-31	2.04604e-29	DOWN	salt inducible kinase 1 [Source:MGI Symbol;Acc:MGI:104754]	[GO:0005524:ATP binding][GO:0000287:magnesium ion binding][GO:0006468:protein phosphorylation][GO:0035556:intracellular signal transduction][GO:0004674:protein serine/threonine kinase activity][GO:0004672:protein kinase activity][GO:0016740:transferase activity][GO:0046872:metal ion binding][GO:0005634:nucleus][GO:0005634:nucleus][GO:0005634:nucleus][GO:0005829:cytosol][GO:0005634:nucleus][GO:000…	-	-
ENSMUSG00000028773	4	130308595	130315463	823	+	Fabp3	4341.69	4263.53	6327.99	18765.4	23849.1	20993.4	333.649	329.44	473.459	1337.02	1688.29	1480.86	13090.2	-2.09108	1.22449e-31	2.24546e-29	DOWN	fatty acid binding protein 3, muscle and heart [Source:MGI Symbol;Acc:MGI:95476]	[GO:0008289:lipid binding][GO:0005615:extracellular space][GO:0042632:cholesterol homeostasis][GO:0005615:extracellular space][GO:0005829:cytosol][GO:0005737:cytoplasm][GO:0005737:cytoplasm][GO:0008092:cytoskeletal protein binding][GO:0005829:cytosol][GO:0005504:fatty acid binding][GO:0005324:long-chain fatty acid transporter activity][GO:0015909:long-chain fatty acid transport][GO:2001245:regula…	-	-
ENSMUSG00000064294	1	58113130	58200698	9070	+	Aox3	34.9081	20.4907	26.72	322.001	288.326	358.719	0.479327	0.282904	0.357214	4.09934	3.64698	4.52128	175.194	-3.56714	1.98601e-31	3.6097e-29	DOWN	aldehyde oxidase 3 [Source:MGI Symbol;Acc:MGI:1918974]	[GO:0046872:metal ion binding][GO:0009055:electron transfer activity][GO:0050660:flavin adenine dinucleotide binding][GO:0055114:oxidation-reduction process][GO:0016491:oxidoreductase activity][GO:0051287:NAD binding][GO:0051536:iron-sulfur cluster binding][GO:0051537:2 iron, 2 sulfur cluster binding][GO:0005506:iron ion binding][GO:0071949:FAD binding][GO:0005829:cytosol][GO:0005737:cytoplasm][G…	[mmu00280:Valine, leucine and isoleucine degradation][mmu00350:Tyrosine metabolism][mmu00380:Tryptophan metabolism][mmu00750:Vitamin B6 metabolism][mmu00760:Nicotinate and nicotinamide metabolism][mmu00830:Retinol metabolism][mmu00982:Drug metabolism - cytochrome P450]	-
ENSMUSG00000031762	8	94172664	94173568	899	+	Mt2	284.501	316.142	433.328	1812.05	1470.36	1678.7	35.2122	39.3431	52.2171	207.936	167.639	190.715	999.18	-2.2668	2.2732e-31	4.09544e-29	DOWN	metallothionein 2 [Source:MGI Symbol;Acc:MGI:97172]	[GO:0046872:metal ion binding][GO:0005634:nucleus][GO:0005634:nucleus][GO:0005737:cytoplasm][GO:0005737:cytoplasm][GO:0009617:response to bacterium][GO:0008270:zinc ion binding][GO:0008270:zinc ion binding][GO:0048471:perinuclear region of cytoplasm][GO:0005829:cytosol][GO:0007263:nitric oxide mediated signal transduction][GO:0006882:cellular zinc ion homeostasis][GO:0010273:detoxification of cop…	-	-
ENSMUSG00000017756	13	73733094	73816754	26161	+	Slc12a7	1709.62	1517.04	1186.13	5520.02	5247.32	5605.47	15.4753	13.8075	10.4535	46.3266	43.7543	46.5749	3464.27	-1.8905	2.53516e-31	4.52769e-29	DOWN	solute carrier family 12, member 7 [Source:MGI Symbol;Acc:MGI:1342283]	[GO:0016021:integral component of membrane][GO:0016020:membrane][GO:0015379:potassium:chloride symporter activity][GO:0006811:ion transport][GO:0055085:transmembrane transport][GO:0005887:integral component of plasma membrane][GO:0005215:transporter activity][GO:0006884:cell volume homeostasis][GO:0015377:cation:chloride symporter activity][GO:1902476:chloride transmembrane transport][GO:0005886:…	-	-
ENSMUSG00000040721	14	55060262	55092324	20695	-	Zfhx2	34.0354	60.7403	56.9252	704.434	456.428	431.485	0.207039	0.371514	0.337142	3.97295	2.55763	2.40928	290.674	-3.39397	4.96981e-31	8.76158e-29	DOWN	zinc finger homeobox 2 [Source:MGI Symbol;Acc:MGI:2686934]	[GO:0003677:DNA binding][GO:0008270:zinc ion binding][GO:0006355:regulation of transcription, DNA-templated][GO:0043565:sequence-specific DNA binding][GO:0003676:nucleic acid binding][GO:0046872:metal ion binding][GO:0005634:nucleus][GO:0005634:nucleus][GO:0005634:nucleus][GO:0005634:nucleus][GO:0044212:transcription regulatory region DNA binding][GO:0000122:negative regulation of transcription b…	-	Homeobox
ENSMUSG00000022286	15	37233036	37363569	15229	+	Grhl2	664.126	685.706	585.516	2103.38	2268.31	2128.06	8.49061	8.81461	7.28808	24.932	26.7137	24.9731	1405.85	-1.74622	5.39142e-31	9.42398e-29	DOWN	grainyhead like transcription factor 2 [Source:MGI Symbol;Acc:MGI:2182543]	[GO:0003700:DNA-binding transcription factor activity][GO:0006357:regulation of transcription by RNA polymerase II][GO:0003700:DNA-binding transcription factor activity][GO:0006357:regulation of transcription by RNA polymerase II][GO:0016020:membrane][GO:0003677:DNA binding][GO:0005634:nucleus][GO:0005634:nucleus][GO:0005634:nucleus][GO:0005634:nucleus][GO:0005654:nucleoplasm][GO:0005634:nucleus]…	-	CP2
ENSMUSG00000046774	X	101794656	101798642	4981	+	8030474K03Rik	453.805	354.928	519.297	1838.2	1821.45	1783.38	14.4154	11.3364	16.0606	54.1381	53.2992	52.0001	1128.51	-2.03881	1.43389e-30	2.47478e-28	DOWN	RIKEN cDNA 8030474K03 gene [Source:MGI Symbol;Acc:MGI:2685988]	[GO:0003674:molecular_function][GO:0008150:biological_process][GO:0005575:cellular_component][GO:0003674:molecular_function][GO:0008150:biological_process][GO:0005575:cellular_component]	-	-
ENSMUSG00000020649	12	24708241	24714146	4545	+	Rrm2	3262.16	2999.69	3104.16	8804.97	8409.33	8545.44	94.0799	86.985	87.1611	235.434	223.407	226.218	5854.29	-1.45969	2.23059e-30	3.83372e-28	DOWN	ribonucleotide reductase M2 [Source:MGI Symbol;Acc:MGI:98181]	[GO:0055114:oxidation-reduction process][GO:0016491:oxidoreductase activity][GO:0009263:deoxyribonucleotide biosynthetic process][GO:0046872:metal ion binding][GO:0005829:cytosol][GO:0005829:cytosol][GO:0005515:protein binding][GO:0005737:cytoplasm][GO:0006260:DNA replication][GO:0051259:protein complex oligomerization][GO:0005829:cytosol][GO:0005635:nuclear envelope][GO:0051290:protein heterotet…	[mmu00230:Purine metabolism][mmu00240:Pyrimidine metabolism][mmu00480:Glutathione metabolism][mmu04115:p53 signaling pathway]	-
ENSMUSG00000031387	X	73922121	73930850	9895	-	Renbp	767.978	802.064	1180.33	3603.35	4300.42	4011.02	22.857	24.0025	34.2026	99.4324	117.903	109.579	2444.19	-2.11707	3.53762e-30	6.00475e-28	DOWN	renin binding protein [Source:MGI Symbol;Acc:MGI:105940]	[GO:0003824:catalytic activity][GO:0003824:catalytic activity][GO:0003824:catalytic activity][GO:0016853:isomerase activity][GO:0042803:protein homodimerization activity][GO:0005524:ATP binding][GO:0043086:negative regulation of catalytic activity][GO:0004857:enzyme inhibitor activity][GO:0010951:negative regulation of endopeptidase activity][GO:0006044:N-acetylglucosamine metabolic process][GO:0…	[mmu00520:Amino sugar and nucleotide sugar metabolism]	-
ENSMUSG00000001985	4	125490700	125714173	8973	+	Grik3	323.773	251.011	204.466	1370.08	1300.13	1138.71	2.28209	1.77894	1.40314	8.95344	8.44155	7.36727	764.695	-2.28637	7.17424e-30	1.20284e-27	DOWN	glutamate receptor, ionotropic, kainate 3 [Source:MGI Symbol;Acc:MGI:95816]	[GO:0016020:membrane][GO:0006811:ion transport][GO:0038023:signaling receptor activity][GO:0004970:ionotropic glutamate receptor activity][GO:0005216:ion channel activity][GO:0016021:integral component of membrane][GO:0005886:plasma membrane][GO:0005515:protein binding][GO:0060078:regulation of postsynaptic membrane potential][GO:0030054:cell junction][GO:0045202:synapse][GO:0045211:postsynaptic …	-	-
ENSMUSG00000056458	12	110807798	110840939	6205	-	Mok	170.177	196.857	303.214	1315.06	1230.97	1160.41	3.8045	4.42512	6.59982	27.258	25.3506	23.8128	729.449	-2.47462	1.23137e-29	2.04782e-27	DOWN	MOK protein kinase [Source:MGI Symbol;Acc:MGI:1336881]	[GO:0005524:ATP binding][GO:0006468:protein phosphorylation][GO:0004672:protein kinase activity][GO:0005524:ATP binding][GO:0006468:protein phosphorylation][GO:0004672:protein kinase activity][GO:0016740:transferase activity][GO:0046872:metal ion binding][GO:0005634:nucleus][GO:0005634:nucleus][GO:0005634:nucleus][GO:0005737:cytoplasm][GO:0000166:nucleotide binding][GO:0035556:intracellular signa…	-	-
ENSMUSG00000004341	13	21312125	21319624	1815	+	Gpx6	23.563	41.7132	45.3078	314.785	448.98	403.4	1.11213	1.97959	2.08202	13.775	19.5207	17.4768	212.958	-3.40604	1.52486e-29	2.50901e-27	DOWN	glutathione peroxidase 6 [Source:MGI Symbol;Acc:MGI:1922762]	[GO:0055114:oxidation-reduction process][GO:0004602:glutathione peroxidase activity][GO:0006979:response to oxidative stress][GO:0016491:oxidoreductase activity][GO:0005576:extracellular region][GO:0098869:cellular oxidant detoxification][GO:0004601:peroxidase activity][GO:0004602:glutathione peroxidase activity][GO:0004601:peroxidase activity]	[mmu00480:Glutathione metabolism][mmu00590:Arachidonic acid metabolism][mmu04918:Thyroid hormone synthesis]	-
ENSMUSG00000064363	MT	10167	11544	1378	+	mt-Nd4	7872.65	9501.83	9386.84	36636.9	26571.7	40617	361.328	438.495	419.457	1559.01	1123.43	1711.16	21764.5	-1.95594	1.52702e-29	2.50901e-27	DOWN	mitochondrially encoded NADH dehydrogenase 4 [Source:MGI Symbol;Acc:MGI:102498]	[GO:0055114:oxidation-reduction process][GO:0006120:mitochondrial electron transport, NADH to ubiquinone][GO:0008137:NADH dehydrogenase (ubiquinone) activity][GO:0042773:ATP synthesis coupled electron transport][GO:0016020:membrane][GO:0016021:integral component of membrane][GO:0016491:oxidoreductase activity][GO:0005739:mitochondrion][GO:0005739:mitochondrion][GO:0070469:respirasome][GO:0048039:…	[mmu00190:Oxidative phosphorylation][mmu05012:Parkinson's disease]	-
ENSMUSG00000096780	17	6438524	6467022	7324	-	Tmem181b-ps	171.05	139.776	155.673	679.179	739.434	721.269	4.45925	3.66394	3.95129	16.4163	17.7575	17.2598	434.397	-2.19891	2.00282e-29	3.26467e-27	DOWN	transmembrane protein 181B, pseudogene [Source:MGI Symbol;Acc:MGI:3779544]	-	-	-
ENSMUSG00000045010	X	101790053	101794423	3853	-	Gm4779	709.507	560.567	766.747	2372.17	2526.84	2414.02	22.538	17.9045	23.7136	69.8641	73.9402	70.3882	1558.31	-1.84632	4.16125e-29	6.62527e-27	DOWN	predicted gene 4779 [Source:MGI Symbol;Acc:MGI:3646776]	-	-	-
ENSMUSG00000029095	5	35757880	35884973	29616	+	Ablim2	54.9802	42.445	81.3217	447.374	492.601	467.229	0.975661	0.757348	1.40503	7.36061	8.05252	7.61067	264.325	-2.99689	4.21848e-29	6.66471e-27	DOWN	actin-binding LIM protein 2 [Source:MGI Symbol;Acc:MGI:2385758]	[GO:0006351:transcription, DNA-templated][GO:0003779:actin binding][GO:0007010:cytoskeleton organization][GO:0030036:actin cytoskeleton organization][GO:0046872:metal ion binding][GO:0006351:transcription, DNA-templated][GO:0003779:actin binding][GO:0007010:cytoskeleton organization][GO:0030036:actin cytoskeleton organization][GO:0046872:metal ion binding][GO:0005737:cytoplasm][GO:0045944:positiv…	-	-
ENSMUSG00000024462	17	37045966	37075067	19606	+	Gabbr1	582.092	551.053	436.813	2260.32	1804.43	2022.11	7.01501	6.67739	5.12529	25.2556	20.0318	22.3687	1276.14	-1.95297	5.07369e-29	7.95465e-27	DOWN	gamma-aminobutyric acid (GABA) B receptor, 1 [Source:MGI Symbol;Acc:MGI:1860139]	[GO:0007186:G protein-coupled receptor signaling pathway][GO:0016021:integral component of membrane][GO:0004930:G protein-coupled receptor activity][GO:0004965:G protein-coupled GABA receptor activity][GO:0016020:membrane][GO:0005615:extracellular space][GO:0005886:plasma membrane][GO:0005515:protein binding][GO:0005737:cytoplasm][GO:0060078:regulation of postsynaptic membrane potential][GO:00300…	-	-
ENSMUSG00000019996	10	20148471	20281590	16861	+	Map7	561.148	559.835	467.019	1966.28	1820.39	1722.11	8.34668	8.37285	6.76328	27.1165	24.9428	23.5125	1182.8	-1.79291	6.09782e-29	9.45208e-27	DOWN	microtubule-associated protein 7 [Source:MGI Symbol;Acc:MGI:1328328]	[GO:0000226:microtubule cytoskeleton organization][GO:0015630:microtubule cytoskeleton][GO:0000226:microtubule cytoskeleton organization][GO:0015630:microtubule cytoskeleton][GO:0005829:cytosol][GO:0030424:axon][GO:0000226:microtubule cytoskeleton organization][GO:0015630:microtubule cytoskeleton][GO:0000226:microtubule cytoskeleton organization][GO:0015630:microtubule cytoskeleton][GO:0000226:mi…	-	-
ENSMUSG00000020774	11	73304992	73329596	9305	-	Aspa	8.72702	8.04991	13.9409	233.609	181.933	228.508	0.132329	0.122732	0.20581	3.2842	2.54123	3.18048	112.461	-4.42927	9.45485e-29	1.43843e-26	DOWN	aspartoacylase [Source:MGI Symbol;Acc:MGI:87914]	[GO:0016788:hydrolase activity, acting on ester bonds][GO:0016811:hydrolase activity, acting on carbon-nitrogen (but not peptide) bonds, in linear amides][GO:0046872:metal ion binding][GO:0016787:hydrolase activity][GO:0005634:nucleus][GO:0005634:nucleus][GO:0005829:cytosol][GO:0005829:cytosol][GO:0005737:cytoplasm][GO:0005737:cytoplasm][GO:0042802:identical protein binding][GO:0005515:protein bi…	[mmu00250:Alanine, aspartate and glutamate metabolism][mmu00340:Histidine metabolism]	-
ENSMUSG00000024206	17	56775897	56831013	12166	-	Rfx2	651.036	543.003	562.281	2089.85	1884.23	1912.32	9.94328	8.33881	8.36113	29.5931	26.5095	26.8093	1273.79	-1.74502	9.67446e-29	1.46641e-26	DOWN	regulatory factor X, 2 (influences HLA class II expression) [Source:MGI Symbol;Acc:MGI:106583]	[GO:0003677:DNA binding][GO:0006355:regulation of transcription, DNA-templated][GO:0005634:nucleus][GO:0003700:DNA-binding transcription factor activity][GO:0005634:nucleus][GO:0005634:nucleus][GO:0005634:nucleus][GO:0005737:cytoplasm][GO:0005737:cytoplasm][GO:0005737:cytoplasm][GO:0003700:DNA-binding transcription factor activity][GO:0000978:RNA polymerase II proximal promoter sequence-specific …	-	RFX
ENSMUSG00000030283	6	142821545	142964452	11947	-	St8sia1	73.307	51.2267	80.1599	466.315	466.003	439.144	0.515665	0.362323	0.548992	3.04125	3.01964	2.8355	262.693	-2.75662	1.46512e-28	2.2045e-26	DOWN	ST8 alpha-N-acetyl-neuraminide alpha-2,8-sialyltransferase 1 [Source:MGI Symbol;Acc:MGI:106011]	[GO:0006486:protein glycosylation][GO:0008373:sialyltransferase activity][GO:0016020:membrane][GO:0016021:integral component of membrane][GO:0016740:transferase activity][GO:0016757:transferase activity, transferring glycosyl groups][GO:0000139:Golgi membrane][GO:0005794:Golgi apparatus][GO:0006629:lipid metabolic process][GO:0097503:sialylation][GO:0034605:cellular response to heat][GO:0006665:s…	[mmu00601:Glycosphingolipid biosynthesis - lacto and neolacto series][mmu00603:Glycosphingolipid biosynthesis - globo and isoglobo series][mmu00604:Glycosphingolipid biosynthesis - ganglio series]	-
ENSMUSG00000039157	2	32535332	32569756	11323	+	Fam102a	417.152	312.483	291.596	1402.55	1393.75	1373.6	4.44532	3.34821	3.02537	13.8573	13.6817	13.436	865.19	-2.02817	2.24643e-28	3.36776e-26	DOWN	family with sequence similarity 102, member A [Source:MGI Symbol;Acc:MGI:2138935]	[GO:0003674:molecular_function][GO:0008150:biological_process][GO:0005575:cellular_component]	-	-
ENSMUSG00000050424	X	73033981	73037103	6352	-	Pnma5	948.627	715.711	1045.56	3306.6	3518.43	3163.37	21.5427	16.3425	23.1176	69.6205	73.6033	65.941	2116.38	-1.88394	2.82516e-28	4.21997e-26	DOWN	paraneoplastic antigen family 5 [Source:MGI Symbol;Acc:MGI:2180566]	[GO:0008150:biological_process][GO:0005575:cellular_component][GO:0042802:identical protein binding][GO:0008150:biological_process][GO:0005575:cellular_component][GO:0042802:identical protein binding]	-	-
ENSMUSG00000032796	17	67697259	67822647	12591	+	Lama1	142.25	153.68	65.0573	992.16	799.014	984.244	0.944437	1.02592	0.420535	6.10734	4.88672	5.99823	522.735	-2.93039	4.34574e-28	6.46776e-26	DOWN	laminin, alpha 1 [Source:MGI Symbol;Acc:MGI:99892]	[GO:0007155:cell adhesion][GO:0005102:signaling receptor binding][GO:0030155:regulation of cell adhesion][GO:0030334:regulation of cell migration][GO:0045995:regulation of embryonic development][GO:0005615:extracellular space][GO:0005615:extracellular space][GO:0005515:protein binding][GO:0005576:extracellular region][GO:0016020:membrane][GO:0005911:cell-cell junction][GO:0031012:extracellular ma…	-	-
ENSMUSG00000022884	16	23107444	23114136	27018	+	Eif4a2	8554.23	9836.26	9413.56	24186.2	24227.9	25465.3	199.785	230.987	214.053	523.72	521.244	545.921	16947.2	-1.40984	5.68789e-28	8.43471e-26	DOWN	eukaryotic translation initiation factor 4A2 [Source:MGI Symbol;Acc:MGI:106906]	[GO:0005524:ATP binding][GO:0003676:nucleic acid binding][GO:0016787:hydrolase activity][GO:0048471:perinuclear region of cytoplasm][GO:0003723:RNA binding][GO:0000166:nucleotide binding][GO:0006412:translation][GO:0003743:translation initiation factor activity][GO:0006413:translational initiation][GO:0004386:helicase activity][GO:1990830:cellular response to leukemia inhibitory factor][GO:001688…	-	-
ENSMUSG00000043411	4	137593755	137658537	26928	+	Usp48	3268.27	3047.99	2468.69	9886.43	8722.13	9011.39	36.0048	33.7624	26.4787	100.979	88.5134	91.1245	6067.48	-1.65215	1.11879e-27	1.63401e-25	DOWN	ubiquitin specific peptidase 48 [Source:MGI Symbol;Acc:MGI:2158502]	[GO:0005515:protein binding][GO:0006511:ubiquitin-dependent protein catabolic process][GO:0036459:thiol-dependent ubiquitinyl hydrolase activity][GO:0016579:protein deubiquitination][GO:0004843:thiol-dependent ubiquitin-specific protease activity][GO:0016787:hydrolase activity][GO:0005634:nucleus][GO:0005654:nucleoplasm][GO:0005829:cytosol][GO:0008233:peptidase activity][GO:0008234:cysteine-type …	-	-
ENSMUSG00000057000	X	136072099	136085255	3539	-	Nxf3	102.106	63.6675	73.1895	530.355	475.578	514.462	2.16849	1.35956	1.51335	10.4429	9.30403	10.029	293.226	-2.67067	1.12177e-27	1.63401e-25	DOWN	nuclear RNA export factor 3 [Source:MGI Symbol;Acc:MGI:2685230]	[GO:0005634:nucleus][GO:0005515:protein binding][GO:0003723:RNA binding][GO:0005737:cytoplasm][GO:0003676:nucleic acid binding][GO:0003729:mRNA binding][GO:0051028:mRNA transport][GO:0006406:mRNA export from nucleus][GO:0005634:nucleus][GO:0005654:nucleoplasm][GO:0005634:nucleus][GO:0005515:protein binding][GO:0005737:cytoplasm][GO:0005737:cytoplasm][GO:0016973:poly(A)+ mRNA export from nucleus][…	-	-
ENSMUSG00000053175	7	19808462	19822770	4607	-	Bcl3	128.287	185.148	106.88	744.12	780.927	861.693	4.38573	6.36435	3.55747	23.5859	24.5931	27.0403	467.843	-2.49548	1.25544e-27	1.80947e-25	DOWN	B cell leukemia/lymphoma 3 [Source:MGI Symbol;Acc:MGI:88140]	[GO:0005515:protein binding][GO:0005515:protein binding][GO:0002455:humoral immune response mediated by circulating immunoglobulin][GO:0005634:nucleus][GO:0005634:nucleus][GO:0005654:nucleoplasm][GO:0032991:protein-containing complex][GO:0005829:cytosol][GO:0005737:cytoplasm][GO:0005737:cytoplasm][GO:0005886:plasma membrane][GO:0045944:positive regulation of transcription by RNA polymerase II][GO…	-	-
ENSMUSG00000029826	6	38305286	38354603	14760	-	Zc3hav1	500.058	621.307	289.273	2863.74	2340.65	2812.31	6.39694	7.99161	3.60285	33.9653	27.5824	33.0229	1571.22	-2.5026	1.93095e-27	2.73509e-25	DOWN	zinc finger CCCH type, antiviral 1 [Source:MGI Symbol;Acc:MGI:1926031]	[GO:0046872:metal ion binding][GO:0003950:NAD+ ADP-ribosyltransferase activity][GO:0009615:response to virus][GO:0045071:negative regulation of viral genome replication][GO:0061014:positive regulation of mRNA catabolic process][GO:0005829:cytosol][GO:0046872:metal ion binding][GO:0003950:NAD+ ADP-ribosyltransferase activity][GO:0005634:nucleus][GO:0005634:nucleus][GO:0005829:cytosol][GO:0003723:R…	-	-
ENSMUSG00000079584	X	57409154	57488767	2156	+	Gm364	250.466	313.947	235.833	1186.98	985.203	1145.09	7.34732	9.26006	6.73553	32.2832	26.6226	30.8335	686.254	-2.04768	2.39192e-27	3.37639e-25	DOWN	predicted gene 364 [Source:MGI Symbol;Acc:MGI:2685210]	[GO:0016021:integral component of membrane][GO:0016020:membrane][GO:0003674:molecular_function][GO:0016020:membrane][GO:0072657:protein localization to membrane]	-	-
ENSMUSG00000053367	7	6252710	6282066	2161	+	Epp13	103.852	114.162	82.4834	533.061	568.141	501.697	6.86327	7.58609	5.30727	32.6622	34.5874	30.4341	317.233	-2.40726	5.1919e-27	7.18072e-25	DOWN	epididymal protein 13 [Source:MGI Symbol;Acc:MGI:3643580]	[GO:0003674:molecular_function][GO:0008150:biological_process][GO:0005575:cellular_component][GO:0005576:extracellular region]	-	-
ENSMUSG00000050917	7	144847367	144865243	3425	+	Fgf4	1846.64	1776.1	1747.25	4572.96	4839.83	4914.84	38.5451	37.2763	35.5083	88.4984	93.0597	94.1667	3282.94	-1.41558	5.85121e-27	8.03846e-25	DOWN	fibroblast growth factor 4 [Source:MGI Symbol;Acc:MGI:95518]	[GO:0005576:extracellular region][GO:0008083:growth factor activity][GO:0008543:fibroblast growth factor receptor signaling pathway][GO:0005104:fibroblast growth factor receptor binding][GO:0005576:extracellular region][GO:0008083:growth factor activity][GO:0008543:fibroblast growth factor receptor signaling pathway][GO:0005104:fibroblast growth factor receptor binding][GO:0010468:regulation of g…	-	-
ENSMUSG00000026956	2	25359889	25365682	6759	-	Uap1l1	936.41	941.84	1116.43	2811.42	3393.95	3279.54	17.684	17.8842	20.5274	49.2257	59.0424	56.8497	2079.93	-1.66414	1.03539e-26	1.41298e-24	DOWN	UDP-N-acteylglucosamine pyrophosphorylase 1-like 1 [Source:MGI Symbol;Acc:MGI:2443318]	[GO:0070569:uridylyltransferase activity][GO:0016740:transferase activity][GO:0016779:nucleotidyltransferase activity][GO:0006048:UDP-N-acetylglucosamine biosynthetic process][GO:0003977:UDP-N-acetylglucosamine diphosphorylase activity]	[mmu00520:Amino sugar and nucleotide sugar metabolism]	-
ENSMUSG00000026301	1	90042132	90153401	12040	-	Iqca	32.29	27.8088	38.3374	295.844	257.472	308.933	0.636199	0.550914	0.735417	5.40429	4.67303	5.58714	160.114	-3.14409	1.2845e-26	1.74713e-24	DOWN	IQ motif containing with AAA domain [Source:MGI Symbol;Acc:MGI:1922168]	[GO:0005524:ATP binding][GO:0005524:ATP binding][GO:0003674:molecular_function][GO:0008150:biological_process][GO:0005575:cellular_component][GO:0005737:cytoplasm][GO:0000166:nucleotide binding][GO:0005856:cytoskeleton][GO:0042995:cell projection][GO:0005929:cilium][GO:0031514:motile cilium][GO:0005524:ATP binding]	-	-
ENSMUSG00000045216	1	36068400	36106446	7010	+	Hs6st1	1208.69	1144.55	938.684	3591.62	3406.72	3246.35	20.5551	19.5711	15.5421	56.6298	53.3683	50.6757	2256.1	-1.63683	1.92354e-26	2.5906e-24	DOWN	heparan sulfate 6-O-sulfotransferase 1 [Source:MGI Symbol;Acc:MGI:1354958]	[GO:0016021:integral component of membrane][GO:0008146:sulfotransferase activity][GO:0016020:membrane][GO:0016740:transferase activity][GO:0060716:labyrinthine layer blood vessel development][GO:0048666:neuron development][GO:0048666:neuron development][GO:0048286:lung alveolus development][GO:0001525:angiogenesis][GO:0015012:heparan sulfate proteoglycan biosynthetic process][GO:0017095:heparan s…	[mmu00534:Glycosaminoglycan biosynthesis - heparan sulfate / heparin]	-
ENSMUSG00000032449	9	97074961	97111157	17389	-	Slc25a36	3117.29	3195.08	2400.15	9291.13	8454.02	10273.9	37.7186	38.872	28.275	104.231	94.229	114.108	6121.93	-1.6846	2.67474e-26	3.56722e-24	DOWN	solute carrier family 25, member 36 [Source:MGI Symbol;Acc:MGI:1924909]	[GO:0022857:transmembrane transporter activity][GO:0055085:transmembrane transport][GO:0016020:membrane][GO:0016021:integral component of membrane][GO:0005739:mitochondrion][GO:0005743:mitochondrial inner membrane][GO:0005739:mitochondrion][GO:0005739:mitochondrion][GO:0007005:mitochondrion organization][GO:0007005:mitochondrion organization][GO:0051881:regulation of mitochondrial membrane potent…	-	-
ENSMUSG00000033983	11	88970252	88991613	6503	+	Coil	935.537	911.104	868.98	2565.19	2571.53	2443.38	18.9643	18.5703	17.1503	48.2109	48.0187	45.4639	1715.95	-1.48061	4.76253e-26	6.31066e-24	DOWN	coilin [Source:MGI Symbol;Acc:MGI:104842]	[GO:0008022:protein C-terminus binding][GO:0042802:identical protein binding][GO:0001650:fibrillar center][GO:0005634:nucleus][GO:0005654:nucleoplasm][GO:0005730:nucleolus][GO:0015030:Cajal body][GO:0016604:nuclear body]	-	-
ENSMUSG00000024209	17	56875477	56888904	3620	+	1700061G19Rik	230.393	203.443	175.422	754.944	888.385	929.351	5.44317	4.83283	4.03509	16.5366	19.3342	20.1541	530.323	-2.07428	5.34193e-26	7.03303e-24	DOWN	RIKEN cDNA 1700061G19 gene [Source:MGI Symbol;Acc:MGI:1925875]	[GO:0003824:catalytic activity][GO:0003674:molecular_function][GO:0008150:biological_process][GO:0005575:cellular_component]	-	-
ENSMUSG00000026235	1	77367185	77515088	23962	-	Epha4	104.724	78.3037	83.6451	504.198	438.341	504.25	1.04667	0.786906	0.813937	4.67213	4.0357	4.62605	285.577	-2.43985	7.2864e-26	9.44175e-24	DOWN	Eph receptor A4 [Source:MGI Symbol;Acc:MGI:98277]	[GO:1904646:cellular response to amyloid-beta][GO:1900272:negative regulation of long-term synaptic potentiation][GO:0010977:negative regulation of neuron projection development][GO:0004672:protein kinase activity][GO:0005524:ATP binding][GO:0006468:protein phosphorylation][GO:0016020:membrane][GO:0016021:integral component of membrane][GO:0016740:transferase activity][GO:0005886:plasma membrane]…	[mmu04360:Axon guidance]	-
ENSMUSG00000017929	2	167298444	167349183	5357	-	B4galt5	396.207	425.182	435.652	1319.57	1304.38	1321.26	5.95209	6.42243	6.37197	18.3794	18.0508	18.2195	867.043	-1.65063	7.74826e-26	9.97231e-24	DOWN	UDP-Gal:betaGlcNAc beta 1,4-galactosyltransferase, polypeptide 5 [Source:MGI Symbol;Acc:MGI:1927169]	[GO:0005975:carbohydrate metabolic process][GO:0016757:transferase activity, transferring glycosyl groups][GO:0016020:membrane][GO:0016021:integral component of membrane][GO:0016740:transferase activity][GO:0005794:Golgi apparatus][GO:0046872:metal ion binding][GO:0006629:lipid metabolic process][GO:0006665:sphingolipid metabolic process][GO:0032580:Golgi cisterna membrane][GO:0006486:protein gly…	[mmu00512:Mucin type O-glycan biosynthesis]	-
ENSMUSG00000017861	2	163054687	163084688	6572	+	Mybl2	6115.03	6194.04	6293.13	14831	16113.3	15112.2	105.929	107.887	106.138	238.199	257.126	240.296	10776.4	-1.30795	8.12558e-26	1.0398e-23	DOWN	myeloblastosis oncogene-like 2 [Source:MGI Symbol;Acc:MGI:101785]	[GO:0003677:DNA binding][GO:0005634:nucleus][GO:0005634:nucleus][GO:0005654:nucleoplasm][GO:0045944:positive regulation of transcription by RNA polymerase II][GO:0000978:RNA polymerase II proximal promoter sequence-specific DNA binding][GO:0001228:DNA-binding transcription activator activity, RNA polymerase II-specific][GO:0045893:positive regulation of transcription, DNA-templated][GO:0090307:mi…	-	MYB
ENSMUSG00000069793	11	82978390	82991830	11759	-	Slfn9	349.954	416.4	242.803	1628.95	1393.75	1460.41	3.83654	4.59005	2.59162	16.5572	14.0754	14.6962	915.378	-2.14644	1.55922e-25	1.95269e-23	DOWN	schlafen 9 [Source:MGI Symbol;Acc:MGI:2445121]	[GO:0005524:ATP binding][GO:0046872:metal ion binding][GO:0016787:hydrolase activity][GO:0005634:nucleus][GO:0005737:cytoplasm][GO:0005737:cytoplasm][GO:0090305:nucleic acid phosphodiester bond hydrolysis][GO:0000166:nucleotide binding][GO:0004518:nuclease activity][GO:0008270:zinc ion binding][GO:0051607:defense response to virus][GO:0090502:RNA phosphodiester bond hydrolysis, endonucleolytic][G…	-	-
ENSMUSG00000055780	X	51753959	51801233	8253	-	Usp26	88.1429	88.5491	23.2348	877.611	628.785	748.077	1.34881	1.36246	0.34617	12.4514	8.86361	10.5078	409.067	-3.47661	2.0175e-25	2.51129e-23	DOWN	ubiquitin specific peptidase 26 [Source:MGI Symbol;Acc:MGI:1933247]	[GO:0006511:ubiquitin-dependent protein catabolic process][GO:0036459:thiol-dependent ubiquitinyl hydrolase activity][GO:0016579:protein deubiquitination][GO:0016787:hydrolase activity][GO:0005634:nucleus][GO:0005634:nucleus][GO:0008233:peptidase activity][GO:0008234:cysteine-type peptidase activity][GO:0006508:proteolysis][GO:0004197:cysteine-type endopeptidase activity][GO:0016579:protein deubi…	-	-
ENSMUSG00000037012	10	62268855	62379908	25944	-	Hk1	1587.45	1416.05	1387.12	3842.37	3984.43	3967.62	23.4686	21.0497	19.9659	52.667	54.2625	53.8418	2697.5	-1.42531	4.69202e-25	5.71911e-23	DOWN	hexokinase 1 [Source:MGI Symbol;Acc:MGI:96103]	[GO:0006096:glycolytic process][GO:0005524:ATP binding][GO:0005975:carbohydrate metabolic process][GO:0016773:phosphotransferase activity, alcohol group as acceptor][GO:0004396:hexokinase activity][GO:0005536:glucose binding][GO:0001678:cellular glucose homeostasis][GO:0005623:cell][GO:0016020:membrane][GO:0016740:transferase activity][GO:0003824:catalytic activity][GO:0008152:metabolic process][…	[mmu00010:Glycolysis / Gluconeogenesis][mmu00051:Fructose and mannose metabolism][mmu00052:Galactose metabolism][mmu00500:Starch and sucrose metabolism][mmu00520:Amino sugar and nucleotide sugar metabolism][mmu00524:Neomycin, kanamycin and gentamicin biosynthesis][mmu04066:HIF-1 signaling pathway][mmu04910:Insulin signaling pathway][mmu04930:Type II diabetes mellitus][mmu04973:Carbohydrate digest…	-
ENSMUSG00000027078	2	84798828	84810335	3599	+	Ube2l6	143.123	111.967	116.174	528.551	575.588	599.993	5.8025	4.56428	4.58564	19.8675	21.4962	22.3281	345.899	-2.19756	8.36848e-25	1.00807e-22	DOWN	ubiquitin-conjugating enzyme E2L 6 [Source:MGI Symbol;Acc:MGI:1914500]	[GO:0016740:transferase activity][GO:0005515:protein binding][GO:0000166:nucleotide binding][GO:0005524:ATP binding][GO:0061631:ubiquitin conjugating enzyme activity][GO:0006511:ubiquitin-dependent protein catabolic process][GO:0016567:protein ubiquitination][GO:0031625:ubiquitin protein ligase binding][GO:0043130:ubiquitin binding][GO:0000151:ubiquitin ligase complex][GO:0019941:modification-dep…	[mmu04120:Ubiquitin mediated proteolysis][mmu05012:Parkinson's disease]	-
ENSMUSG00000083563	2	22588103	22589647	1545	-	Gm13340	1387.6	1956.86	1632.24	6714.22	4863.24	7295.66	56.8021	80.5449	65.0538	254.828	183.388	274.137	3974.97	-1.92266	1.1338e-24	1.35387e-22	DOWN	predicted gene 13340 [Source:MGI Symbol;Acc:MGI:3650227]	-	-	-
ENSMUSG00000017639	11	79591212	79698023	7833	+	Rab11fip4	1207.82	952.817	874.789	3639.42	3170.52	3134.01	10.6749	8.46732	7.52748	29.8224	25.8128	25.425	2163.23	-1.71141	1.35489e-24	1.61318e-22	DOWN	RAB11 family interacting protein 4 (class II) [Source:MGI Symbol;Acc:MGI:2442920]	[GO:0005509:calcium ion binding][GO:0016020:membrane][GO:0046872:metal ion binding][GO:0048471:perinuclear region of cytoplasm][GO:0031410:cytoplasmic vesicle][GO:0042803:protein homodimerization activity][GO:0005768:endosome][GO:0005768:endosome][GO:0005768:endosome][GO:0007049:cell cycle][GO:0051301:cell division][GO:0017137:Rab GTPase binding][GO:0055038:recycling endosome membrane][GO:0030139…	-	-
ENSMUSG00000040726	14	26994416	27002329	2124	+	Hesx1	40.1443	35.1269	11.6174	322.001	371.313	320.422	2.2252	1.95777	0.626959	16.5483	18.9596	16.303	183.437	-3.51285	1.36888e-24	1.62301e-22	DOWN	homeobox gene expressed in ES cells [Source:MGI Symbol;Acc:MGI:96071]	[GO:0003677:DNA binding][GO:0006355:regulation of transcription, DNA-templated][GO:0043565:sequence-specific DNA binding][GO:0005634:nucleus][GO:0005634:nucleus][GO:0005634:nucleus][GO:0005515:protein binding][GO:0007275:multicellular organism development][GO:0003682:chromatin binding][GO:0000978:RNA polymerase II proximal promoter sequence-specific DNA binding][GO:0003677:DNA binding][GO:0045892…	-	Homeobox
ENSMUSG00000005397	13	13437551	13512269	10540	+	Nid1	1327.38	1206.76	627.339	5672.45	4686.63	5476.54	13.7828	12.599	6.34205	54.6088	44.8276	52.1973	3166.18	-2.32285	1.56546e-24	1.83727e-22	DOWN	nidogen 1 [Source:MGI Symbol;Acc:MGI:97342]	[GO:0005509:calcium ion binding][GO:0007160:cell-matrix adhesion][GO:0005615:extracellular space][GO:0071944:cell periphery][GO:0005515:protein binding][GO:0005576:extracellular region][GO:0031012:extracellular matrix][GO:0007155:cell adhesion][GO:0010811:positive regulation of cell-substrate adhesion][GO:0030198:extracellular matrix organization][GO:0005518:collagen binding][GO:0005518:collagen …	-	-
ENSMUSG00000031310	X	101404384	101420849	38943	-	Zmym3	963.463	746.447	685.425	2793.38	2483.22	2694.86	10.0602	7.83696	6.96818	27.0429	23.8854	25.8291	1727.8	-1.73378	1.8004e-24	2.09504e-22	DOWN	zinc finger, MYM-type 3 [Source:MGI Symbol;Acc:MGI:1927231]	[GO:0008270:zinc ion binding][GO:0008270:zinc ion binding][GO:0008270:zinc ion binding][GO:0008270:zinc ion binding][GO:0046872:metal ion binding][GO:0005634:nucleus][GO:0005654:nucleoplasm][GO:0005634:nucleus][GO:0000981:DNA-binding transcription factor activity, RNA polymerase II-specific][GO:0006357:regulation of transcription by RNA polymerase II][GO:0005515:protein binding][GO:0007010:cytosk…	-	-
ENSMUSG00000031392	X	74013914	74023918	33648	-	Irak1	626.6	575.203	563.443	1682.16	1673.57	1736.15	10.3337	9.53811	9.04693	25.7207	25.4245	26.2817	1142.85	-1.52779	2.69616e-24	3.11973e-22	DOWN	interleukin-1 receptor-associated kinase 1 [Source:MGI Symbol;Acc:MGI:107420]	[GO:0005524:ATP binding][GO:0005515:protein binding][GO:0007165:signal transduction][GO:0006468:protein phosphorylation][GO:0004674:protein serine/threonine kinase activity][GO:0004672:protein kinase activity][GO:0070498:interleukin-1-mediated signaling pathway][GO:0005524:ATP binding][GO:0005515:protein binding][GO:0007165:signal transduction][GO:0006468:protein phosphorylation][GO:0004674:prote…	[mmu04064:NF-kappa B signaling pathway][mmu04210:Apoptosis][mmu04620:Toll-like receptor signaling pathway][mmu04722:Neurotrophin signaling pathway][mmu05133:Pertussis][mmu05140:Leishmaniasis][mmu05142:Chagas disease (American trypanosomiasis)][mmu05145:Toxoplasmosis][mmu05152:Tuberculosis][mmu05162:Measles][mmu05169:Epstein-Barr virus infection]	-
ENSMUSG00000050671	12	87278638	87299705	4631	-	Ism2	30.5446	4.39086	6.97043	326.511	338.331	331.911	0.76477	0.110541	0.169919	7.57958	7.80337	7.62815	173.11	-4.5666	3.2938e-24	3.7899e-22	DOWN	isthmin 2 [Source:MGI Symbol;Acc:MGI:2685110]	[GO:0003674:molecular_function][GO:0008150:biological_process][GO:0003674:molecular_function][GO:0008150:biological_process]	-	-
ENSMUSG00000046338	2	127425199	127436092	2628	+	Gpat2	553.293	518.122	573.899	1545.06	1671.44	1576.58	13.3156	12.5376	13.447	34.4748	37.0544	34.8274	1073.07	-1.54362	5.11367e-24	5.81867e-22	DOWN	glycerol-3-phosphate acyltransferase 2, mitochondrial [Source:MGI Symbol;Acc:MGI:2684962]	[GO:0016746:transferase activity, transferring acyl groups][GO:0008374:O-acyltransferase activity][GO:0044255:cellular lipid metabolic process][GO:0016020:membrane][GO:0016021:integral component of membrane][GO:0016740:transferase activity][GO:0006629:lipid metabolic process][GO:0005739:mitochondrion][GO:0005515:protein binding][GO:1990511:piRNA biosynthetic process][GO:0005739:mitochondrion][GO:…	[mmu00561:Glycerolipid metabolism][mmu00564:Glycerophospholipid metabolism]	-
ENSMUSG00000032346	9	78376109	78378725	2138	-	Ooep	348.208	414.205	424.034	1223.97	1286.3	1305.94	10.3006	12.3201	12.2127	33.5693	35.0515	35.4607	833.775	-1.68605	5.28323e-24	5.995e-22	DOWN	oocyte expressed protein [Source:MGI Symbol;Acc:MGI:1915218]	[GO:0003723:RNA binding][GO:0032991:protein-containing complex][GO:0032991:protein-containing complex][GO:0005515:protein binding][GO:0005737:cytoplasm][GO:0045177:apical part of cell][GO:0001701:in utero embryonic development][GO:0003723:RNA binding][GO:0005938:cell cortex][GO:0009566:fertilization][GO:0007566:embryo implantation][GO:0034622:cellular protein-containing complex assembly][GO:00064…	-	-
ENSMUSG00000073403	17	36141758	36145923	2632	-	Gm10499	61.0892	53.4222	32.5287	340.04	383.016	344.677	2.27539	2.00074	1.17963	11.7429	13.1418	11.7843	202.462	-2.84469	6.80582e-24	7.68029e-22	DOWN	predicted gene 10499 [Source:MGI Symbol;Acc:MGI:3702919]	-	-	-
ENSMUSG00000046447	4	138454314	138460123	4444	+	Camk2n1	236.502	243.693	232.348	755.846	917.111	896.16	3.36582	3.48719	3.21944	9.97332	12.0232	11.7069	546.943	-1.84873	6.94331e-24	7.81399e-22	DOWN	calcium/calmodulin-dependent protein kinase II inhibitor 1 [Source:MGI Symbol;Acc:MGI:1913509]	[GO:0004860:protein kinase inhibitor activity][GO:0016020:membrane][GO:0005886:plasma membrane][GO:0030054:cell junction][GO:0045202:synapse][GO:0045211:postsynaptic membrane][GO:0014069:postsynaptic density][GO:0010628:positive regulation of gene expression][GO:0070373:negative regulation of ERK1 and ERK2 cascade][GO:0045202:synapse][GO:0030425:dendrite][GO:0019901:protein kinase binding][GO:000…	-	-
ENSMUSG00000032436	9	114756836	114781856	5060	-	Cmtm7	295.846	296.383	313.669	938.944	979.883	997.01	8.57121	8.63389	8.84779	25.2213	26.1514	26.5141	636.956	-1.68722	9.50376e-24	1.06083e-21	DOWN	CKLF-like MARVEL transmembrane domain containing 7 [Source:MGI Symbol;Acc:MGI:2447166]	[GO:0016020:membrane][GO:0007165:signal transduction][GO:0016021:integral component of membrane][GO:0003674:molecular_function][GO:0005125:cytokine activity][GO:0005615:extracellular space][GO:0016021:integral component of membrane][GO:0006935:chemotaxis][GO:0002337:B-1a B cell differentiation][GO:0016020:membrane][GO:0007165:signal transduction][GO:0016021:integral component of membrane][GO:0003…	-	-
ENSMUSG00000030539	7	80186841	80226527	11686	+	Sema4b	686.817	660.825	752.806	2073.62	1900.19	1940.4	10.9998	10.6416	11.7385	30.7909	28.0339	28.5257	1335.78	-1.49489	1.80198e-23	1.98444e-21	DOWN	sema domain, immunoglobulin domain (Ig), transmembrane domain (TM) and short cytoplasmic domain, (semaphorin) 4B [Source:MGI Symbol;Acc:MGI:107559]	[GO:0005515:protein binding][GO:0016020:membrane][GO:0016021:integral component of membrane][GO:0005615:extracellular space][GO:0005515:protein binding][GO:0005887:integral component of plasma membrane][GO:0005886:plasma membrane][GO:0007275:multicellular organism development][GO:0005886:plasma membrane][GO:0016020:membrane][GO:0030215:semaphorin receptor binding][GO:0030154:cell differentiation]…	-	-
ENSMUSG00000031383	X	73639419	73643514	2722	+	Dusp9	1997.62	1801.72	2040.01	4931.94	5823.97	4987.6	46.4145	42.0925	46.1489	106.245	124.654	106.374	3597.14	-1.43129	2.03706e-23	2.23137e-21	DOWN	dual specificity phosphatase 9 [Source:MGI Symbol;Acc:MGI:2387107]	[GO:0016791:phosphatase activity][GO:0006470:protein dephosphorylation][GO:0008138:protein tyrosine/serine/threonine phosphatase activity][GO:0016311:dephosphorylation][GO:0017017:MAP kinase tyrosine/serine/threonine phosphatase activity][GO:0016787:hydrolase activity][GO:0005829:cytosol][GO:0005737:cytoplasm][GO:0004721:phosphoprotein phosphatase activity][GO:0004725:protein tyrosine phosphatase…	[mmu04010:MAPK signaling pathway]	-
ENSMUSG00000006342	10	75636706	75644008	12207	-	Susd2	265.302	253.206	343.874	994.866	1042.66	1018.71	4.8876	4.69038	6.16798	16.9931	17.6946	17.227	653.103	-1.82998	6.84955e-23	7.38475e-21	DOWN	sushi domain containing 2 [Source:MGI Symbol;Acc:MGI:1918983]	[GO:0006955:immune response][GO:0005044:scavenger receptor activity][GO:0030247:polysaccharide binding][GO:0016020:membrane][GO:0016021:integral component of membrane][GO:0003674:molecular_function][GO:0005886:plasma membrane][GO:0005886:plasma membrane][GO:0005886:plasma membrane][GO:0006897:endocytosis][GO:1902807:negative regulation of cell cycle G1/S phase transition][GO:0051782:negative regu…	-	-
ENSMUSG00000019087	X	74297097	74304721	10128	+	Atp6ap1	1258.44	1309.94	1463.79	3311.11	3632.27	3704.64	36.3593	38.0551	41.1765	88.6969	96.6732	98.2496	2446.7	-1.40147	1.46663e-22	1.54474e-20	DOWN	ATPase, H+ transporting, lysosomal accessory protein 1 [Source:MGI Symbol;Acc:MGI:109629]	[GO:0046933:proton-transporting ATP synthase activity, rotational mechanism][GO:0015991:ATP hydrolysis coupled proton transport][GO:0046961:proton-transporting ATPase activity, rotational mechanism][GO:0033180:proton-transporting V-type ATPase, V1 domain][GO:0005623:cell][GO:0016020:membrane][GO:0016021:integral component of membrane][GO:0006811:ion transport][GO:0000166:nucleotide binding][GO:00…	[mmu00190:Oxidative phosphorylation][mmu04142:Lysosome][mmu04145:Phagosome][mmu05152:Tuberculosis][mmu05161:Hepatitis B][mmu05323:Rheumatoid arthritis]	-
ENSMUSG00000030091	6	91013068	91116829	23907	-	Nup210	1224.4	1066.25	763.262	3577.19	3398.2	3419.96	11.0044	9.63557	6.67886	29.8082	28.1343	28.214	2241.54	-1.76571	1.62864e-22	1.70662e-20	DOWN	nucleoporin 210 [Source:MGI Symbol;Acc:MGI:1859555]	[GO:0016020:membrane][GO:0016021:integral component of membrane][GO:0005634:nucleus][GO:0015031:protein transport][GO:0005783:endoplasmic reticulum][GO:0005789:endoplasmic reticulum membrane][GO:0031965:nuclear membrane][GO:0051028:mRNA transport][GO:0005643:nuclear pore][GO:0005789:endoplasmic reticulum membrane][GO:0005643:nuclear pore][GO:0005643:nuclear pore][GO:0005635:nuclear envelope][GO:0…	-	-
ENSMUSG00000064368	MT	13552	14070	519	-	mt-Nd6	2769.08	4521.12	4566.79	18237.7	12694.9	22644	337.442	553.969	541.827	2060.55	1425.06	2532.89	10905.6	-2.17591	1.86174e-22	1.94592e-20	DOWN	mitochondrially encoded NADH dehydrogenase 6 [Source:MGI Symbol;Acc:MGI:102495]	[GO:0055114:oxidation-reduction process][GO:0008137:NADH dehydrogenase (ubiquinone) activity][GO:0016020:membrane][GO:0016021:integral component of membrane][GO:0016491:oxidoreductase activity][GO:0005739:mitochondrion][GO:0005739:mitochondrion][GO:0070469:respirasome][GO:0031966:mitochondrial membrane][GO:0035094:response to nicotine][GO:0042220:response to cocaine][GO:0042542:response to hydrog…	[mmu00190:Oxidative phosphorylation][mmu05012:Parkinson's disease]	-
ENSMUSG00000034520	11	102799579	102819700	9767	-	Gjc1	352.572	316.142	358.977	1064.32	1036.27	1059.56	6.53343	5.89051	6.4766	18.2859	17.6893	18.0228	697.974	-1.62227	1.91541e-22	1.99694e-20	DOWN	gap junction protein, gamma 1 [Source:MGI Symbol;Acc:MGI:95718]	[GO:0007154:cell communication][GO:0005922:connexin complex][GO:0016020:membrane][GO:0016021:integral component of membrane][GO:0005886:plasma membrane][GO:0030054:cell junction][GO:0034220:ion transmembrane transport][GO:0005515:protein binding][GO:0055085:transmembrane transport][GO:0001570:vasculogenesis][GO:0007507:heart development][GO:0048738:cardiac muscle tissue development][GO:0007268:ch…	-	-
ENSMUSG00000051220	X	102141716	102157091	5302	-	Ercc6l	749.651	769.864	676.132	1976.2	1939.55	2037.42	8.94231	9.23382	7.8525	21.8561	21.3126	22.3086	1358.14	-1.43773	2.31222e-22	2.40454e-20	DOWN	excision repair cross-complementing rodent repair deficiency complementation group 6 like [Source:MGI Symbol;Acc:MGI:2654144]	[GO:0005524:ATP binding][GO:0016787:hydrolase activity][GO:0003677:DNA binding][GO:0000166:nucleotide binding][GO:0005694:chromosome][GO:0000775:chromosome, centromeric region][GO:0004386:helicase activity][GO:0007049:cell cycle][GO:0051301:cell division][GO:0000776:kinetochore][GO:0000777:condensed chromosome kinetochore][GO:0015616:DNA translocase activity][GO:0015616:DNA translocase activity][…	-	-
ENSMUSG00000048371	8	104591451	104599026	5692	+	Pdp2	339.481	382.737	224.215	1389.02	1229.91	1237.01	3.77208	4.27604	2.42559	14.3095	12.5887	12.6165	800.396	-2.02147	2.76132e-22	2.86431e-20	DOWN	pyruvate dehyrogenase phosphatase catalytic subunit 2 [Source:MGI Symbol;Acc:MGI:1918878]	[GO:0003824:catalytic activity][GO:0043169:cation binding][GO:0006470:protein dephosphorylation][GO:0004722:protein serine/threonine phosphatase activity][GO:0046872:metal ion binding][GO:0016787:hydrolase activity][GO:0004721:phosphoprotein phosphatase activity][GO:0005739:mitochondrion][GO:0005739:mitochondrion][GO:0005739:mitochondrion][GO:0006470:protein dephosphorylation][GO:0004722:protein …	-	-
ENSMUSG00000025265	X	151046150	151089521	8696	+	Fgd1	1409.41	1174.56	709.822	4606.33	4607.9	4382.5	22.2792	18.6686	10.9244	67.5099	67.0978	63.5894	2815.09	-2.04396	2.94878e-22	3.04339e-20	DOWN	FYVE, RhoGEF and PH domain containing 1 [Source:MGI Symbol;Acc:MGI:104566]	[GO:0046872:metal ion binding][GO:0005089:Rho guanyl-nucleotide exchange factor activity][GO:0035023:regulation of Rho protein signal transduction][GO:0046872:metal ion binding][GO:0005089:Rho guanyl-nucleotide exchange factor activity][GO:0035023:regulation of Rho protein signal transduction][GO:0005794:Golgi apparatus][GO:0005515:protein binding][GO:0005737:cytoplasm][GO:0005737:cytoplasm][GO:0…	-	-
ENSMUSG00000031410	X	135579555	135598777	7699	-	Nxf7	79.4159	75.3765	44.146	391.452	386.208	437.868	2.24931	2.14661	1.21736	10.2795	10.0764	11.3837	235.744	-2.59664	3.74921e-22	3.85015e-20	DOWN	nuclear RNA export factor 7 [Source:MGI Symbol;Acc:MGI:2159343]	[GO:0005634:nucleus][GO:0005515:protein binding][GO:0003723:RNA binding][GO:0005737:cytoplasm][GO:0003676:nucleic acid binding][GO:0051028:mRNA transport][GO:0006406:mRNA export from nucleus][GO:0005634:nucleus][GO:0005737:cytoplasm][GO:0016973:poly(A)+ mRNA export from nucleus][GO:0003723:RNA binding][GO:0003723:RNA binding][GO:0003729:mRNA binding][GO:0005634:nucleus][GO:0005515:protein binding…	-	-
ENSMUSG00000041654	11	113244853	113650079	10727	-	Slc39a11	280.137	270.77	266.038	822.591	989.458	887.224	6.37089	6.19164	5.8906	17.3446	20.7286	18.5209	586.037	-1.72357	3.88711e-22	3.98181e-20	DOWN	solute carrier family 39 (metal ion transporter), member 11 [Source:MGI Symbol;Acc:MGI:1917056]	[GO:0016020:membrane][GO:0055085:transmembrane transport][GO:0046873:metal ion transmembrane transporter activity][GO:0030001:metal ion transport][GO:0016021:integral component of membrane][GO:0005794:Golgi apparatus][GO:0005794:Golgi apparatus][GO:0005886:plasma membrane][GO:0005886:plasma membrane][GO:0005634:nucleus][GO:0005634:nucleus][GO:0005737:cytoplasm][GO:0005737:cytoplasm][GO:0006811:io…	-	-
ENSMUSG00000013766	17	35076902	35078804	2857	+	Ly6g6e	61.0892	58.5448	39.4991	290.432	376.633	363.826	3.3832	3.26009	2.12979	14.9128	19.2143	18.4952	198.337	-2.68232	4.71255e-22	4.79152e-20	DOWN	lymphocyte antigen 6 complex, locus G6E [Source:MGI Symbol;Acc:MGI:1917524]	[GO:0016020:membrane][GO:0004675:transmembrane receptor protein serine/threonine kinase activity][GO:0005886:plasma membrane][GO:0005886:plasma membrane][GO:0005886:plasma membrane][GO:0042995:cell projection][GO:0009986:cell surface][GO:0099601:regulation of neurotransmitter receptor activity][GO:0095500:acetylcholine receptor signaling pathway][GO:0002029:desensitization of G protein-coupled re…	-	-
ENSMUSG00000022488	15	103453794	103498810	19110	+	Nckap1l	206.83	219.543	184.716	751.336	675.598	745.524	2.62041	2.79674	2.27849	8.82552	7.88474	8.66997	463.925	-1.82665	4.82968e-22	4.89849e-20	DOWN	NCK associated protein 1 like [Source:MGI Symbol;Acc:MGI:1926063]	[GO:0016020:membrane][GO:0016021:integral component of membrane][GO:0005096:GTPase activator activity][GO:0043547:positive regulation of GTPase activity][GO:0005829:cytosol][GO:0005737:cytoplasm][GO:0030890:positive regulation of B cell proliferation][GO:0006935:chemotaxis][GO:0042493:response to drug][GO:0000902:cell morphogenesis][GO:0005829:cytosol][GO:0044877:protein-containing complex bindin…	-	-
ENSMUSG00000031262	X	134308084	134362639	11747	+	Cenpi	362.171	373.223	384.535	1144.59	1075.64	1082.54	6.92225	7.17263	7.15576	20.2831	18.9384	18.9923	737.117	-1.56107	5.76922e-22	5.80839e-20	DOWN	centromere protein I [Source:MGI Symbol;Acc:MGI:2147897]	[GO:0000776:kinetochore][GO:0034508:centromere complex assembly][GO:0003674:molecular_function][GO:0008150:biological_process][GO:0005634:nucleus][GO:0016604:nuclear body][GO:0005829:cytosol][GO:0005694:chromosome][GO:0000775:chromosome, centromeric region][GO:0000776:kinetochore][GO:0005829:cytosol][GO:0016604:nuclear body][GO:0000776:kinetochore][GO:0034508:centromere complex assembly][GO:00036…	-	-
ENSMUSG00000041261	4	8143362	8239041	3853	-	Car8	54.1075	48.2995	66.2191	335.531	293.646	370.209	0.888155	0.797169	1.05828	5.10639	4.44016	5.578	194.669	-2.57685	6.28584e-22	6.31305e-20	DOWN	carbonic anhydrase 8 [Source:MGI Symbol;Acc:MGI:88253]	[GO:0008270:zinc ion binding][GO:0004089:carbonate dehydratase activity][GO:0046872:metal ion binding][GO:0005515:protein binding][GO:0005737:cytoplasm][GO:0048015:phosphatidylinositol-mediated signaling]	[mmu00910:Nitrogen metabolism]	-
ENSMUSG00000041607	18	82475146	82585637	24632	+	Mbp	348.208	262.72	343.874	1106.71	1077.76	1032.75	4.59091	3.48281	4.41415	13.5283	13.0897	12.4985	695.339	-1.75571	6.6949e-22	6.70747e-20	DOWN	myelin basic protein [Source:MGI Symbol;Acc:MGI:96925]	[GO:0019911:structural constituent of myelin sheath][GO:0016020:membrane][GO:0071944:cell periphery][GO:0005886:plasma membrane][GO:0005634:nucleus][GO:0032991:protein-containing complex][GO:0005737:cytoplasm][GO:0005516:calmodulin binding][GO:0007605:sensory perception of sound][GO:0000165:MAPK cascade][GO:0009636:response to toxic substance][GO:0043025:neuronal cell body][GO:0043025:neuronal ce…	-	-
ENSMUSG00000039116	10	14402583	14545659	20879	-	Adgrg6	0	5.85448	3.48521	173.177	139.375	157.02	0	0.0572156	0.0329811	1.5606	1.2479	1.40089	79.8186	-5.60694	7.19992e-22	7.1959e-20	DOWN	adhesion G protein-coupled receptor G6 [Source:MGI Symbol;Acc:MGI:1916151]	[GO:0007186:G protein-coupled receptor signaling pathway][GO:0016021:integral component of membrane][GO:0004930:G protein-coupled receptor activity][GO:0016020:membrane][GO:0007166:cell surface receptor signaling pathway][GO:0004888:transmembrane signaling receptor activity][GO:0005886:plasma membrane][GO:0009986:cell surface][GO:0005737:cytoplasm][GO:0005887:integral component of plasma membrane…	-	-
ENSMUSG00000028527	4	101419277	101466995	14969	+	Ak4	2000.23	1643.65	1454.5	5376.61	4697.27	4757.82	29.0151	23.9733	20.542	72.3107	62.7672	63.3508	3321.68	-1.54014	7.7977e-22	7.77442e-20	DOWN	adenylate kinase 4 [Source:MGI Symbol;Acc:MGI:87979]	[GO:0005524:ATP binding][GO:0005739:mitochondrion][GO:0019205:nucleobase-containing compound kinase activity][GO:0006139:nucleobase-containing compound metabolic process][GO:0004017:adenylate kinase activity][GO:0016776:phosphotransferase activity, phosphate group as acceptor][GO:0016740:transferase activity][GO:0000166:nucleotide binding][GO:0016301:kinase activity][GO:0016310:phosphorylation][G…	[mmu00230:Purine metabolism]	-
ENSMUSG00000028601	4	108165437	108179308	11097	+	Echdc2	570.747	487.386	652.897	1757.03	1651.23	1771.9	27.3671	23.4982	30.4801	78.1113	72.9349	77.9873	1148.53	-1.60064	8.50261e-22	8.4567e-20	DOWN	enoyl Coenzyme A hydratase domain containing 2 [Source:MGI Symbol;Acc:MGI:1289238]	[GO:0003824:catalytic activity][GO:0006629:lipid metabolic process][GO:0005739:mitochondrion][GO:0006631:fatty acid metabolic process][GO:0016829:lyase activity][GO:0005739:mitochondrion][GO:0004300:enoyl-CoA hydratase activity][GO:0006635:fatty acid beta-oxidation][GO:0003824:catalytic activity][GO:0003824:catalytic activity][GO:0006629:lipid metabolic process][GO:0005739:mitochondrion][GO:00066…	-	-
ENSMUSG00000048707	2	25262618	25269885	4003	+	Tprn	264.429	230.52	325.287	973.219	973.499	933.181	6.0007	5.25992	7.18697	20.4764	20.3504	19.4384	616.689	-1.81707	8.59677e-22	8.5297e-20	DOWN	taperin [Source:MGI Symbol;Acc:MGI:2139535]	[GO:0019902:phosphatase binding][GO:0007605:sensory perception of sound][GO:0003674:molecular_function][GO:0042995:cell projection][GO:0007605:sensory perception of sound][GO:0007605:sensory perception of sound][GO:0007605:sensory perception of sound][GO:0120045:stereocilium maintenance][GO:0032420:stereocilium][GO:0032420:stereocilium]	-	-
ENSMUSG00000042492	7	127197459	127208468	8400	-	Tbc1d10b	1208.69	1145.28	1259.32	3006.25	2988.59	2957.84	21.1523	20.1526	21.4568	48.7772	48.1784	47.5135	2094.33	-1.30962	1.15094e-21	1.12297e-19	DOWN	TBC1 domain family, member 10b [Source:MGI Symbol;Acc:MGI:1915699]	[GO:0005096:GTPase activator activity][GO:0005096:GTPase activator activity][GO:0005737:cytoplasm][GO:0005886:plasma membrane][GO:0005829:cytosol][GO:0005096:GTPase activator activity][GO:0005096:GTPase activator activity][GO:0043087:regulation of GTPase activity][GO:0017137:Rab GTPase binding][GO:0006886:intracellular protein transport][GO:0090630:activation of GTPase activity][GO:0043087:regula…	-	-
ENSMUSG00000039682	5	45493374	45512691	5263	+	Lap3	1982.78	1779.76	2525.62	5949.35	6487.87	5893.98	55.3163	49.9249	68.6014	153.886	166.734	150.934	4103.23	-1.54457	1.44016e-21	1.39194e-19	DOWN	leucine aminopeptidase 3 [Source:MGI Symbol;Acc:MGI:1914238]	[GO:0005622:intracellular][GO:0030145:manganese ion binding][GO:0005737:cytoplasm][GO:0006508:proteolysis][GO:0008235:metalloexopeptidase activity][GO:0004177:aminopeptidase activity][GO:0019538:protein metabolic process][GO:0046872:metal ion binding][GO:0016787:hydrolase activity][GO:0005654:nucleoplasm][GO:0005829:cytosol][GO:0008233:peptidase activity][GO:0005739:mitochondrion][GO:0008233:pept…	[mmu00330:Arginine and proline metabolism][mmu00480:Glutathione metabolism]	-
ENSMUSG00000064341	MT	2751	3707	957	+	mt-Nd1	25476.8	34498.3	30206.4	101757	75061.6	111854	1683.69	2292.41	1943.58	6234.94	4569.62	6785.33	63142.3	-1.67851	2.15109e-21	2.06449e-19	DOWN	mitochondrially encoded NADH dehydrogenase 1 [Source:MGI Symbol;Acc:MGI:101787]	[GO:0016020:membrane][GO:0055114:oxidation-reduction process][GO:0016021:integral component of membrane][GO:0016491:oxidoreductase activity][GO:0005739:mitochondrion][GO:0005743:mitochondrial inner membrane][GO:0005739:mitochondrion][GO:0005739:mitochondrion][GO:0070469:respirasome][GO:0030425:dendrite][GO:0043025:neuronal cell body][GO:0031966:mitochondrial membrane][GO:0005747:mitochondrial res…	[mmu00190:Oxidative phosphorylation][mmu05012:Parkinson's disease]	-
ENSMUSG00000021608	13	73467197	73516422	13880	+	Lpcat1	1019.32	1011.36	977.022	2467.77	2610.89	2442.1	17.5421	17.5007	16.3706	39.3757	41.391	38.5778	1754.74	-1.32197	2.23217e-21	2.13732e-19	DOWN	lysophosphatidylcholine acyltransferase 1 [Source:MGI Symbol;Acc:MGI:2384812]	[GO:0005509:calcium ion binding][GO:0016746:transferase activity, transferring acyl groups][GO:0016020:membrane][GO:0016021:integral component of membrane][GO:0016740:transferase activity][GO:0000139:Golgi membrane][GO:0005794:Golgi apparatus][GO:0005794:Golgi apparatus][GO:0046872:metal ion binding][GO:0005783:endoplasmic reticulum][GO:0006629:lipid metabolic process][GO:0005783:endoplasmic reti…	[mmu00564:Glycerophospholipid metabolism][mmu00565:Ether lipid metabolism]	-
ENSMUSG00000051827	X	37244976	37249686	1530	+	Rhox2a	71.5616	79.7673	73.1895	357.178	409.614	342.124	5.69302	6.38065	5.66889	26.345	30.018	24.9831	222.239	-2.30243	2.53646e-21	2.4174e-19	DOWN	reproductive homeobox 2A [Source:MGI Symbol;Acc:MGI:1922449]	[GO:0003677:DNA binding][GO:0003674:molecular_function][GO:0008150:biological_process][GO:0005575:cellular_component][GO:0005634:nucleus][GO:0000122:negative regulation of transcription by RNA polymerase II][GO:0003677:DNA binding][GO:0003674:molecular_function][GO:0005575:cellular_component][GO:0005634:nucleus][GO:0000122:negative regulation of transcription by RNA polymerase II]	-	Homeobox
ENSMUSG00000022914	16	95992092	96082526	46911	-	Brwd1	1616.24	1414.59	832.966	5825.79	4753.66	5057.82	10.3851	9.13923	5.21094	34.7062	28.1368	29.8309	3250.18	-2.01566	2.66989e-21	2.53869e-19	DOWN	bromodomain and WD repeat domain containing 1 [Source:MGI Symbol;Acc:MGI:1890651]	[GO:0005515:protein binding][GO:0005634:nucleus][GO:0005634:nucleus][GO:0005829:cytosol][GO:0005634:nucleus][GO:0005515:protein binding][GO:0005737:cytoplasm][GO:0005730:nucleolus][GO:0006357:regulation of transcription by RNA polymerase II][GO:0006357:regulation of transcription by RNA polymerase II][GO:0007010:cytoskeleton organization][GO:0007010:cytoskeleton organization][GO:0005654:nucleopla…	-	-
ENSMUSG00000031805	8	71676296	71690575	17417	+	Jak3	292.355	201.248	197.495	878.513	909.663	865.522	4.5666	3.16075	3.00349	12.7228	13.089	12.4097	557.466	-1.93968	3.56173e-21	3.37109e-19	DOWN	Janus kinase 3 [Source:MGI Symbol;Acc:MGI:99928]	[GO:0005524:ATP binding][GO:0016020:membrane][GO:0006468:protein phosphorylation][GO:0005856:cytoskeleton][GO:0035556:intracellular signal transduction][GO:0004672:protein kinase activity][GO:0004713:protein tyrosine kinase activity][GO:0004715:non-membrane spanning protein tyrosine kinase activity][GO:0016740:transferase activity][GO:0000166:nucleotide binding][GO:0016301:kinase activity][GO:001…	[mmu04062:Chemokine signaling pathway][mmu04151:PI3K-Akt signaling pathway][mmu04630:Jak-STAT signaling pathway][mmu05162:Measles][mmu05166:HTLV-I infection][mmu05169:Epstein-Barr virus infection][mmu05203:Viral carcinogenesis][mmu05340:Primary immunodeficiency]	-
ENSMUSG00000079432	X	135167624	135177632	3698	-	Gm15023	0.872702	5.85448	3.48521	183.099	108.521	172.339	0.0149255	0.100677	0.0580336	2.90335	1.70971	2.70549	79.0285	-5.46399	3.84945e-21	3.62669e-19	DOWN	predicted gene 15023 [Source:MGI Symbol;Acc:MGI:3805552]	[GO:0003674:molecular_function][GO:0008150:biological_process][GO:0005737:cytoplasm]	-	-
ENSMUSG00000004637	8	114439655	115352708	14522	+	Wwox	172.795	139.776	147.541	615.139	596.867	543.824	2.89038	2.35089	2.40282	9.53998	9.19697	8.34992	369.324	-1.93302	4.78595e-21	4.45788e-19	DOWN	WW domain-containing oxidoreductase [Source:MGI Symbol;Acc:MGI:1931237]	[GO:0005515:protein binding][GO:0005634:nucleus][GO:0045944:positive regulation of transcription by RNA polymerase II][GO:0005634:nucleus][GO:0005634:nucleus][GO:0005794:Golgi apparatus][GO:0005829:cytosol][GO:0005515:protein binding][GO:0005737:cytoplasm][GO:0005737:cytoplasm][GO:0005737:cytoplasm][GO:0005886:plasma membrane][GO:0016055:Wnt signaling pathway][GO:0016491:oxidoreductase activity][…	-	-
ENSMUSG00000031370	X	163935443	163958661	10014	-	Zrsr2	721.725	801.332	714.469	1957.26	1879.97	2000.4	11.804	13.1779	11.3769	29.6794	28.3238	30.0313	1345.86	-1.38249	8.95474e-21	8.21057e-19	DOWN	zinc finger (CCCH type), RNA binding motif and serine/arginine rich 2 [Source:MGI Symbol;Acc:MGI:103287]	[GO:0046872:metal ion binding][GO:0003723:RNA binding][GO:0003676:nucleic acid binding][GO:0000398:mRNA splicing, via spliceosome][GO:0089701:U2AF][GO:0003723:RNA binding][GO:0000398:mRNA splicing, via spliceosome][GO:0089701:U2AF][GO:0003723:RNA binding][GO:0000398:mRNA splicing, via spliceosome][GO:0089701:U2AF][GO:0003723:RNA binding][GO:0000398:mRNA splicing, via spliceosome][GO:0089701:U2AF]	-	-
ENSMUSG00000043323	5	110361754	110448602	22062	-	Fbrsl1	1218.29	1113.82	1239.57	3219.11	2836.45	2951.46	16.3245	15.0064	16.1714	39.9921	35.0112	36.3016	2096.45	-1.33518	1.02384e-20	9.3458e-19	DOWN	fibrosin-like 1 [Source:MGI Symbol;Acc:MGI:1920907]	[GO:0008150:biological_process][GO:0005575:cellular_component][GO:0008150:biological_process][GO:0005575:cellular_component][GO:0008150:biological_process][GO:0005575:cellular_component][GO:0008150:biological_process][GO:0005575:cellular_component][GO:0008150:biological_process][GO:0005575:cellular_component][GO:0008150:biological_process][GO:0005575:cellular_component]	-	-
ENSMUSG00000034607	X	112638431	112698651	3886	-	Pof1b	10.4724	14.6362	10.4556	191.216	132.992	178.721	0.170441	0.239515	0.165678	2.88538	1.99386	2.66996	89.749	-3.80471	1.06921e-20	9.73833e-19	DOWN	premature ovarian failure 1B [Source:MGI Symbol;Acc:MGI:1916943]	[GO:0030054:cell junction][GO:0007015:actin filament organization][GO:0003382:epithelial cell morphogenesis][GO:0003779:actin binding][GO:0070830:bicellular tight junction assembly][GO:0005923:bicellular tight junction][GO:0051015:actin filament binding][GO:0005923:bicellular tight junction][GO:0005884:actin filament][GO:0030036:actin cytoskeleton organization][GO:0030057:desmosome][GO:0030057:de…	-	-
ENSMUSG00000034165	17	47505051	47599691	24797	+	Ccnd3	2567.49	2383.51	2593	5768.06	6215.5	5715.26	42.0898	39.2881	41.3863	87.6694	93.8616	86.0011	4207.14	-1.23052	1.14321e-20	1.03893e-18	DOWN	cyclin D3 [Source:MGI Symbol;Acc:MGI:88315]	[GO:0005634:nucleus][GO:0005634:nucleus][GO:0016020:membrane][GO:0005634:nucleus][GO:0005634:nucleus][GO:0005515:protein binding][GO:0005737:cytoplasm][GO:0005737:cytoplasm][GO:0016538:cyclin-dependent protein serine/threonine kinase regulator activity][GO:0006468:protein phosphorylation][GO:0005737:cytoplasm][GO:0001934:positive regulation of protein phosphorylation][GO:0000122:negative regulati…	-	-
ENSMUSG00000029084	5	43868553	43912375	4151	+	Cd38	24.4357	42.445	47.6313	305.766	258.536	282.125	0.472614	0.82544	0.896935	5.48305	4.60624	5.00869	160.156	-2.89426	1.18396e-20	1.07359e-18	DOWN	CD38 antigen [Source:MGI Symbol;Acc:MGI:107474]	[GO:0003953:NAD+ nucleosidase activity][GO:0050135:NAD(P)+ nucleosidase activity][GO:0016020:membrane][GO:0016021:integral component of membrane][GO:0016740:transferase activity][GO:0016787:hydrolase activity][GO:0005634:nucleus][GO:0009986:cell surface][GO:0005886:plasma membrane][GO:0005886:plasma membrane][GO:0016020:membrane][GO:0043231:intracellular membrane-bounded organelle][GO:0045893:pos…	[mmu00760:Nicotinate and nicotinamide metabolism][mmu04020:Calcium signaling pathway][mmu04640:Hematopoietic cell lineage][mmu04970:Salivary secretion][mmu04972:Pancreatic secretion][mmu05169:Epstein-Barr virus infection]	-
ENSMUSG00000055629	7	141061104	141072400	8420	+	B4galnt4	277.519	321.997	382.212	1155.42	1099.04	991.904	4.93584	5.75833	6.61849	19.0527	18.0064	16.1934	704.682	-1.72881	1.32188e-20	1.19338e-18	DOWN	beta-1,4-N-acetyl-galactosaminyl transferase 4 [Source:MGI Symbol;Acc:MGI:2652891]	[GO:0008376:acetylgalactosaminyltransferase activity][GO:0032580:Golgi cisterna membrane][GO:0016020:membrane][GO:0016021:integral component of membrane][GO:0016740:transferase activity][GO:0005794:Golgi apparatus][GO:0033842:N-acetyl-beta-glucosaminyl-glycoprotein 4-beta-N-acetylgalactosaminyltransferase activity][GO:0008376:acetylgalactosaminyltransferase activity][GO:0008376:acetylgalactosamin…	-	-
ENSMUSG00000015243	4	53030787	53159895	11037	-	Abca1	102.979	72.4492	74.3512	425.727	378.76	421.272	0.634667	0.448961	0.446142	2.43265	2.15034	2.3832	245.923	-2.29375	1.39412e-20	1.25584e-18	DOWN	ATP-binding cassette, sub-family A (ABC1), member 1 [Source:MGI Symbol;Acc:MGI:99607]	[GO:0016021:integral component of membrane][GO:0005524:ATP binding][GO:0055085:transmembrane transport][GO:0042626:ATPase activity, coupled to transmembrane movement of substances][GO:0016887:ATPase activity][GO:0016020:membrane][GO:0009897:external side of plasma membrane][GO:0005794:Golgi apparatus][GO:0048471:perinuclear region of cytoplasm][GO:0009986:cell surface][GO:0005515:protein binding]…	-	-
ENSMUSG00000086859	11	117076008	117078955	5749	+	Snhg20	67.1981	54.8858	111.527	411.296	474.514	502.973	1.97398	1.62115	3.18972	11.2019	12.8404	13.5622	270.399	-2.58784	1.48403e-20	1.33391e-18	DOWN	small nucleolar RNA host gene 20 [Source:MGI Symbol;Acc:MGI:1924222]	-	-	-
ENSMUSG00000031765	8	94179082	94180327	2267	+	Mt1	3017.8	3225.09	5161.6	12532.8	14270.5	13045.4	175.91	189.025	292.935	677.327	766.275	698.004	8542.2	-1.8055	1.78929e-20	1.60127e-18	DOWN	metallothionein 1 [Source:MGI Symbol;Acc:MGI:97171]	[GO:0046872:metal ion binding][GO:0005507:copper ion binding][GO:0005634:nucleus][GO:0005829:cytosol][GO:0005634:nucleus][GO:0005737:cytoplasm][GO:0005737:cytoplasm][GO:0008270:zinc ion binding][GO:0008270:zinc ion binding][GO:0048471:perinuclear region of cytoplasm][GO:0005829:cytosol][GO:0005764:lysosome][GO:0046872:metal ion binding][GO:0043524:negative regulation of neuron apoptotic process][…	-	-
ENSMUSG00000029848	6	34920163	34939344	4960	+	Stra8	1066.44	1199.44	1430.1	3248.87	3514.17	3349.75	37.4086	42.3047	48.8413	105.662	113.554	107.857	2301.46	-1.4532	1.83682e-20	1.64024e-18	DOWN	stimulated by retinoic acid gene 8 [Source:MGI Symbol;Acc:MGI:107917]	[GO:0051321:meiotic cell cycle][GO:0071300:cellular response to retinoic acid][GO:0005634:nucleus][GO:0005634:nucleus][GO:0005634:nucleus][GO:0005737:cytoplasm][GO:0005737:cytoplasm][GO:0007283:spermatogenesis][GO:0030154:cell differentiation][GO:0006260:DNA replication][GO:0005515:protein binding][GO:0045944:positive regulation of transcription by RNA polymerase II][GO:0071300:cellular response …	-	-
ENSMUSG00000060002	10	88452745	88504073	18900	-	Chpt1	165.813	160.998	149.864	564.629	538.35	651.057	2.15648	2.10535	1.89762	6.80832	6.44963	7.77222	371.785	-1.87703	2.46967e-20	2.18165e-18	DOWN	choline phosphotransferase 1 [Source:MGI Symbol;Acc:MGI:2384841]	[GO:0016020:membrane][GO:0016021:integral component of membrane][GO:0016020:membrane][GO:0016021:integral component of membrane][GO:0016020:membrane][GO:0016780:phosphotransferase activity, for other substituted phosphate groups][GO:0008654:phospholipid biosynthetic process][GO:0016021:integral component of membrane][GO:0016740:transferase activity][GO:0006657:CDP-choline pathway][GO:0004142:diac…	[mmu00564:Glycerophospholipid metabolism][mmu00565:Ether lipid metabolism]	-
ENSMUSG00000019558	X	73673150	73682502	21943	+	Slc6a8	2480.22	2262.03	2103.91	5761.75	5604.8	5240.37	39.5719	36.2886	32.6821	85.2317	82.376	76.7465	3908.84	-1.27821	2.4918e-20	2.19647e-18	DOWN	solute carrier family 6 (neurotransmitter transporter, creatine), member 8 [Source:MGI Symbol;Acc:MGI:2147834]	[GO:0016021:integral component of membrane][GO:0016020:membrane][GO:0005887:integral component of plasma membrane][GO:0006836:neurotransmitter transport][GO:0005328:neurotransmitter:sodium symporter activity][GO:0005309:creatine:sodium symporter activity][GO:0006811:ion transport][GO:0005886:plasma membrane][GO:0006814:sodium ion transport][GO:0015293:symporter activity][GO:0098978:glutamatergic …	-	-
ENSMUSG00000051257	X	139333683	139338169	1178	+	Trap1a	1611.01	1812.69	2353.68	5509.2	5603.74	5431.86	86.4933	97.8557	123.032	274.235	277.145	267.691	3720.36	-1.51882	2.69506e-20	2.37055e-18	DOWN	tumor rejection antigen P1A [Source:MGI Symbol;Acc:MGI:98818]	[GO:0016020:membrane][GO:0016021:integral component of membrane][GO:0005634:nucleus]	-	-
ENSMUSG00000020173	11	12236608	12464960	34308	-	Cobl	433.733	446.404	240.48	1621.73	1433.12	1552.32	4.88543	5.05575	2.63721	16.936	14.8698	16.0496	954.632	-2.03505	3.21559e-20	2.81036e-18	DOWN	cordon-bleu WH2 repeat [Source:MGI Symbol;Acc:MGI:105056]	[GO:0003785:actin monomer binding][GO:0048471:perinuclear region of cytoplasm][GO:0016020:membrane][GO:0005886:plasma membrane][GO:0005737:cytoplasm][GO:0005886:plasma membrane][GO:0005856:cytoskeleton][GO:0042995:cell projection][GO:0003779:actin binding][GO:0005515:protein binding][GO:0005938:cell cortex][GO:0001843:neural tube closure][GO:0001726:ruffle][GO:0030425:dendrite][GO:0016020:membran…	-	-
ENSMUSG00000027634	2	156927345	156992056	14561	-	Ndrg3	298.464	365.173	346.198	986.749	1030.95	1019.99	4.69215	5.77239	5.29896	14.3826	14.9301	14.7189	674.587	-1.58845	3.72756e-20	3.24401e-18	DOWN	N-myc downstream regulated gene 3 [Source:MGI Symbol;Acc:MGI:1352499]	[GO:0005737:cytoplasm][GO:0003674:molecular_function][GO:0005737:cytoplasm][GO:0005737:cytoplasm][GO:0005737:cytoplasm][GO:0007165:signal transduction]	-	-
ENSMUSG00000034391	18	84934782	84981473	8710	+	Fbxo15	2925.3	2655.74	3312.12	7436.69	7278.37	7064.6	73.0695	66.7004	80.5487	172.225	167.473	161.978	5112.14	-1.29281	4.0316e-20	3.48644e-18	DOWN	F-box protein 15 [Source:MGI Symbol;Acc:MGI:1354755]	[GO:0005515:protein binding][GO:0005515:protein binding][GO:0005515:protein binding]	-	-
ENSMUSG00000031139	X	60055956	60179089	14893	-	Mcf2	246.102	386.396	245.127	1159.02	1030.95	1197.43	3.68225	5.81309	3.57088	16.0783	14.2095	16.4456	710.839	-1.94389	5.23659e-20	4.51898e-18	DOWN	mcf.2 transforming sequence [Source:MGI Symbol;Acc:MGI:96932]	[GO:0005089:Rho guanyl-nucleotide exchange factor activity][GO:0035023:regulation of Rho protein signal transduction][GO:0035556:intracellular signal transduction][GO:0005085:guanyl-nucleotide exchange factor activity][GO:0005515:protein binding][GO:0005085:guanyl-nucleotide exchange factor activity][GO:0005085:guanyl-nucleotide exchange factor activity][GO:0016358:dendrite development][GO:199083…	-	-
ENSMUSG00000025059	X	85701937	85776819	21614	-	Gk	186.758	244.425	127.791	837.023	758.585	899.99	2.72157	3.58148	1.81313	11.3091	10.1833	12.0387	509.095	-2.15006	6.09601e-20	5.23861e-18	DOWN	glycerol kinase [Source:MGI Symbol;Acc:MGI:106594]	[GO:0005975:carbohydrate metabolic process][GO:0006072:glycerol-3-phosphate metabolic process][GO:0016773:phosphotransferase activity, alcohol group as acceptor][GO:0004370:glycerol kinase activity][GO:0016020:membrane][GO:0016740:transferase activity][GO:0005634:nucleus][GO:0005737:cytoplasm][GO:0000166:nucleotide binding][GO:0005524:ATP binding][GO:0016301:kinase activity][GO:0016310:phosphoryl…	[mmu00561:Glycerolipid metabolism][mmu03320:PPAR signaling pathway]	-
ENSMUSG00000087283	2	60411525	60412579	566	+	Gm13580	10.4724	5.12267	20.9113	186.707	197.892	168.509	1.1702	0.575555	2.275	19.343	20.3697	17.2837	98.2689	-3.98979	6.87533e-20	5.89599e-18	DOWN	predicted gene 13580 [Source:MGI Symbol;Acc:MGI:3650460]	-	-	-
ENSMUSG00000026193	1	71585520	71653200	69459	-	Fn1	10722.9	8911.99	4964.11	36847	29832.7	33174.5	81.5605	68.1583	36.7617	259.849	209.028	231.618	20742.2	-2.02103	1.12571e-19	9.59351e-18	DOWN	fibronectin 1 [Source:MGI Symbol;Acc:MGI:95566]	[GO:0005576:extracellular region][GO:0005515:protein binding][GO:0005576:extracellular region][GO:0005515:protein binding][GO:0005576:extracellular region][GO:0005515:protein binding][GO:0005576:extracellular region][GO:0005515:protein binding][GO:0005576:extracellular region][GO:0005515:protein binding][GO:0005576:extracellular region][GO:0005515:protein binding][GO:0005615:extracellular space][…	-	-
ENSMUSG00000037482	2	131853678	131859747	3378	-	Erv3	14.8359	8.78172	3.48521	160.55	135.12	196.594	0.27777	0.165321	0.0635311	2.78696	2.33041	3.37863	86.5609	-4.14154	1.31699e-19	1.12004e-17	DOWN	endogenous retroviral sequence 3 [Source:MGI Symbol;Acc:MGI:1919245]	[GO:0003674:molecular_function][GO:0008150:biological_process][GO:0005575:cellular_component]	-	-
ENSMUSG00000045103	X	82948870	85206141	40435	+	Dmd	617.873	701.806	503.033	1884.2	1653.35	1905.94	2.62091	2.99327	2.07747	7.41021	6.46044	7.42098	1211.03	-1.57587	1.41019e-19	1.19682e-17	DOWN	dystrophin, muscular dystrophy [Source:MGI Symbol;Acc:MGI:94909]	[GO:0008270:zinc ion binding][GO:0005515:protein binding][GO:0001954:positive regulation of cell-matrix adhesion][GO:0002027:regulation of heart rate][GO:0016020:membrane][GO:0046872:metal ion binding][GO:0005886:plasma membrane][GO:0005634:nucleus][GO:0032991:protein-containing complex][GO:0009986:cell surface][GO:0010468:regulation of gene expression][GO:0005515:protein binding][GO:0005737:cyto…	-	-
ENSMUSG00000055373	4	25609332	25800244	16572	-	Fut9	113.451	106.112	29.0435	740.512	567.077	843.821	0.591338	0.556121	0.147388	3.57857	2.72277	4.03717	400.003	-3.09877	1.58887e-19	1.34292e-17	DOWN	fucosyltransferase 9 [Source:MGI Symbol;Acc:MGI:1330859]	[GO:0016020:membrane][GO:0008417:fucosyltransferase activity][GO:0006486:protein glycosylation][GO:0016021:integral component of membrane][GO:0016740:transferase activity][GO:0016757:transferase activity, transferring glycosyl groups][GO:0005794:Golgi apparatus][GO:0032580:Golgi cisterna membrane][GO:0007399:nervous system development][GO:0036065:fucosylation][GO:0006486:protein glycosylation][GO…	[mmu00514:Other types of O-glycan biosynthesis][mmu00601:Glycosphingolipid biosynthesis - lacto and neolacto series][mmu00603:Glycosphingolipid biosynthesis - globo and isoglobo series]	-
ENSMUSG00000070837	7	6995300	7003091	5163	+	Aurkc	75.0524	99.5262	175.422	635.885	636.232	656.163	3.3881	4.51758	7.71016	26.6147	26.4577	27.1897	379.714	-2.47365	1.84517e-19	1.55634e-17	DOWN	aurora kinase C [Source:MGI Symbol;Acc:MGI:1321119]	[GO:0005524:ATP binding][GO:0007283:spermatogenesis][GO:0006468:protein phosphorylation][GO:0004672:protein kinase activity][GO:0051321:meiotic cell cycle][GO:0032133:chromosome passenger complex][GO:0048599:oocyte development][GO:0051255:spindle midzone assembly][GO:0000166:nucleotide binding][GO:0016301:kinase activity][GO:0016310:phosphorylation][GO:0004674:protein serine/threonine kinase acti…	-	-
ENSMUSG00000050973	7	80232865	80242061	4189	+	Gdpgp1	132.651	126.603	94.1008	463.609	480.898	514.462	2.00276	1.92195	1.38325	6.48967	6.68831	7.12975	302.054	-2.03835	2.0485e-19	1.72431e-17	DOWN	GDP-D-glucose phosphorylase 1 [Source:MGI Symbol;Acc:MGI:2443429]	[GO:0080048:GDP-D-glucose phosphorylase activity][GO:0016740:transferase activity][GO:0016787:hydrolase activity][GO:0005737:cytoplasm][GO:0005737:cytoplasm][GO:0000166:nucleotide binding][GO:0005085:guanyl-nucleotide exchange factor activity][GO:0005737:cytoplasm][GO:0006006:glucose metabolic process][GO:0016779:nucleotidyltransferase activity][GO:0006006:glucose metabolic process][GO:0006006:gl…	-	-
ENSMUSG00000030268	6	144993835	145076184	16671	-	Bcat1	4376.6	4452.33	3894.15	9706.94	9548.81	9433.94	35.3377	36.1465	30.6126	72.6666	71.0223	69.9191	6902.13	-1.17282	2.62978e-19	2.18671e-17	DOWN	branched chain aminotransferase 1, cytosolic [Source:MGI Symbol;Acc:MGI:104861]	[GO:0003824:catalytic activity][GO:0004084:branched-chain-amino-acid transaminase activity][GO:0009081:branched-chain amino acid metabolic process][GO:0016740:transferase activity][GO:0008483:transaminase activity][GO:0052654:L-leucine transaminase activity][GO:0052655:L-valine transaminase activity][GO:0052656:L-isoleucine transaminase activity][GO:0008652:cellular amino acid biosynthetic proces…	[mmu00280:Valine, leucine and isoleucine degradation][mmu00290:Valine, leucine and isoleucine biosynthesis][mmu00770:Pantothenate and CoA biosynthesis]	-
ENSMUSG00000042357	4	127354809	127358181	1721	-	Gjb5	241.739	187.343	340.389	1032.75	1138.41	926.798	8.88372	6.92252	12.179	35.188	38.5382	31.2633	644.571	-2.01623	3.39875e-19	2.80907e-17	DOWN	gap junction protein, beta 5 [Source:MGI Symbol;Acc:MGI:95723]	[GO:0007154:cell communication][GO:0005922:connexin complex][GO:0016020:membrane][GO:0016021:integral component of membrane][GO:0005886:plasma membrane][GO:0030054:cell junction][GO:0060713:labyrinthine layer morphogenesis][GO:0060707:trophoblast giant cell differentiation][GO:0060708:spongiotrophoblast differentiation][GO:0005921:gap junction][GO:1905867:epididymis development]	-	-
ENSMUSG00000018428	11	88830792	88864586	15545	-	Akap1	1741.04	1801.72	1411.51	4301.47	4168.49	4053.15	28.7652	29.931	22.7054	65.8909	63.4426	61.4683	2912.9	-1.33695	3.6215e-19	2.98716e-17	DOWN	A kinase (PRKA) anchor protein 1 [Source:MGI Symbol;Acc:MGI:104729]	[GO:0003723:RNA binding][GO:0003676:nucleic acid binding][GO:0005739:mitochondrion][GO:0034237:protein kinase A regulatory subunit binding][GO:0010738:regulation of protein kinase A signaling][GO:0016020:membrane][GO:0016021:integral component of membrane][GO:0005783:endoplasmic reticulum][GO:0005739:mitochondrion][GO:0005739:mitochondrion][GO:0042308:negative regulation of protein import into nu…	-	-
ENSMUSG00000023961	17	44096308	44105809	9005	-	Enpp4	21.8176	38.0541	19.7495	220.981	219.17	233.614	0.302602	0.530694	0.266691	2.84165	2.80021	2.97417	125.565	-3.05649	3.75438e-19	3.07822e-17	DOWN	ectonucleotide pyrophosphatase/phosphodiesterase 4 [Source:MGI Symbol;Acc:MGI:2682634]	[GO:0003824:catalytic activity][GO:0047710:bis(5'-adenosyl)-triphosphatase activity][GO:0030194:positive regulation of blood coagulation][GO:0016020:membrane][GO:0016021:integral component of membrane][GO:0046872:metal ion binding][GO:0005886:plasma membrane][GO:0016787:hydrolase activity][GO:0007596:blood coagulation][GO:0007599:hemostasis][GO:0047710:bis(5'-adenosyl)-triphosphatase activity][GO…	-	-
ENSMUSG00000036932	X	48474944	48513563	9297	-	Aifm1	694.671	799.137	652.897	1812.95	1937.42	1868.92	13.0603	15.1068	11.951	31.6017	33.5539	32.2526	1294.33	-1.38661	4.28254e-19	3.50426e-17	DOWN	apoptosis-inducing factor, mitochondrion-associated 1 [Source:MGI Symbol;Acc:MGI:1349419]	[GO:0050660:flavin adenine dinucleotide binding][GO:0055114:oxidation-reduction process][GO:0016491:oxidoreductase activity][GO:0046983:protein dimerization activity][GO:0016020:membrane][GO:0016021:integral component of membrane][GO:0050660:flavin adenine dinucleotide binding][GO:0055114:oxidation-reduction process][GO:0016491:oxidoreductase activity][GO:0046983:protein dimerization activity][GO…	[mmu04210:Apoptosis]	-
ENSMUSG00000046180	X	58909360	58920304	3256	+	4930550L24Rik	0	0	0	299.452	276.623	297.444	0	0	0	10.4272	9.57017	10.254	145.586	-10.772	5.70705e-19	4.60567e-17	DOWN	RIKEN cDNA 4930550L24 gene [Source:MGI Symbol;Acc:MGI:1922602]	[GO:0003674:molecular_function][GO:0008150:biological_process][GO:0003674:molecular_function][GO:0008150:biological_process]	-	-
ENSMUSG00000031161	X	7930120	7947889	21498	-	Hdac6	3512.63	3427.07	3061.18	7510.65	7448.6	7492.26	44.1052	43.2671	37.4226	87.4352	86.1542	86.3518	5408.73	-1.16637	7.83971e-19	6.28969e-17	DOWN	histone deacetylase 6 [Source:MGI Symbol;Acc:MGI:1333752]	[GO:0008270:zinc ion binding][GO:0046872:metal ion binding][GO:0016787:hydrolase activity][GO:0005634:nucleus][GO:0005634:nucleus][GO:0005634:nucleus][GO:0005654:nucleoplasm][GO:0032991:protein-containing complex][GO:0048471:perinuclear region of cytoplasm][GO:0005515:protein binding][GO:0005737:cytoplasm][GO:0005737:cytoplasm][GO:0005737:cytoplasm][GO:0010033:response to organic substance][GO:00…	[mmu05034:Alcoholism][mmu05203:Viral carcinogenesis]	-
ENSMUSG00000027242	2	121506723	121544860	14770	+	Wdr76	462.532	587.644	356.654	1493.65	1550.15	1654.45	7.01513	8.96158	5.26656	21.0036	21.6577	23.0329	1017.51	-1.73569	8.38099e-19	6.69778e-17	DOWN	WD repeat domain 76 [Source:MGI Symbol;Acc:MGI:1926186]	[GO:0005515:protein binding][GO:0006974:cellular response to DNA damage stimulus][GO:0005634:nucleus][GO:0005634:nucleus][GO:0005634:nucleus][GO:0003677:DNA binding][GO:0006974:cellular response to DNA damage stimulus][GO:0006974:cellular response to DNA damage stimulus][GO:0019899:enzyme binding][GO:0000792:heterochromatin][GO:2000001:regulation of DNA damage checkpoint][GO:0000792:heterochromat…	-	-
ENSMUSG00000040483	11	72301629	72313733	6917	+	Xaf1	26.1811	16.8316	19.7495	199.334	179.805	172.339	0.637596	0.412156	0.468276	4.50081	4.0337	3.85249	102.373	-3.13957	9.87581e-19	7.84659e-17	DOWN	XIAP associated factor 1 [Source:MGI Symbol;Acc:MGI:3772572]	[GO:0006915:apoptotic process][GO:0006915:apoptotic process][GO:0046872:metal ion binding][GO:0005634:nucleus][GO:0005634:nucleus][GO:0005737:cytoplasm][GO:0005739:mitochondrion][GO:0005739:mitochondrion][GO:0031333:negative regulation of protein complex assembly][GO:0035456:response to interferon-beta][GO:0006915:apoptotic process][GO:0046872:metal ion binding][GO:0005634:nucleus][GO:0005634:nuc…	-	-
ENSMUSG00000064345	MT	3914	4951	1038	+	mt-Nd2	12757.2	20500.2	13016.1	57458.7	42326.5	68309.9	777.296	1255.94	772.148	3245.93	2375.68	3820.47	35728.1	-1.86092	1.0529e-18	8.3494e-17	DOWN	mitochondrially encoded NADH dehydrogenase 2 [Source:MGI Symbol;Acc:MGI:102500]	[GO:0055114:oxidation-reduction process][GO:0006120:mitochondrial electron transport, NADH to ubiquinone][GO:0008137:NADH dehydrogenase (ubiquinone) activity][GO:0016020:membrane][GO:0016021:integral component of membrane][GO:0016491:oxidoreductase activity][GO:0014069:postsynaptic density][GO:0005739:mitochondrion][GO:0005743:mitochondrial inner membrane][GO:0005739:mitochondrion][GO:0005739:mit…	[mmu00190:Oxidative phosphorylation][mmu05012:Parkinson's disease]	-
ENSMUSG00000049313	9	41964720	42124297	12362	-	Sorl1	912.847	946.231	455.401	3280.44	2919.43	3216.99	5.3881	5.6158	2.61709	17.9523	15.8738	17.4296	1955.22	-2.02213	1.06079e-18	8.39581e-17	DOWN	sortilin-related receptor, LDLR class A repeats-containing [Source:MGI Symbol;Acc:MGI:1202296]	[GO:0016021:integral component of membrane][GO:0005515:protein binding][GO:0016020:membrane][GO:0005794:Golgi apparatus][GO:0005794:Golgi apparatus][GO:0005615:extracellular space][GO:0005886:plasma membrane][GO:0005794:Golgi apparatus][GO:0048471:perinuclear region of cytoplasm][GO:0005515:protein binding][GO:0007275:multicellular organism development][GO:0005794:Golgi apparatus][GO:0005576:extr…	-	-
ENSMUSG00000003812	8	84908560	84922915	11575	+	Dnase2a	239.12	227.593	331.095	941.65	897.96	846.374	3.71306	3.55346	5.00559	13.5568	12.8445	12.0636	580.632	-1.75718	1.69796e-18	1.32599e-16	DOWN	deoxyribonuclease II alpha [Source:MGI Symbol;Acc:MGI:1329019]	[GO:0004531:deoxyribonuclease II activity][GO:0006259:DNA metabolic process][GO:0016787:hydrolase activity][GO:0007275:multicellular organism development][GO:0004518:nuclease activity][GO:0050776:regulation of immune response][GO:0005764:lysosome][GO:0006915:apoptotic process][GO:0004519:endonuclease activity][GO:0005764:lysosome][GO:0030218:erythrocyte differentiation][GO:0006309:apoptotic DNA f…	[mmu04142:Lysosome]	-
ENSMUSG00000032268	9	49081260	49117587	11676	+	Tmprss5	6.10892	5.12267	13.9409	150.628	153.206	119.999	0.133458	0.112526	0.296522	3.05097	3.0832	2.40635	74.8343	-4.14137	2.04416e-18	1.57835e-16	DOWN	transmembrane protease, serine 5 (spinesin) [Source:MGI Symbol;Acc:MGI:1933407]	[GO:0016020:membrane][GO:0006508:proteolysis][GO:0004252:serine-type endopeptidase activity][GO:0005044:scavenger receptor activity][GO:0016021:integral component of membrane][GO:0005886:plasma membrane][GO:0016787:hydrolase activity][GO:0008233:peptidase activity][GO:0005886:plasma membrane][GO:0005886:plasma membrane][GO:0008236:serine-type peptidase activity][GO:0006897:endocytosis][GO:0008233…	-	-
ENSMUSG00000023932	17	45391884	45433737	4209	-	Cdc5l	2022.05	1924.66	1598.55	4730.8	4382.34	4461.65	42.2483	40.4342	32.5185	91.6438	84.3467	85.5685	3186.68	-1.29094	2.07614e-18	1.60003e-16	DOWN	cell division cycle 5-like (S. pombe) [Source:MGI Symbol;Acc:MGI:1918952]	[GO:0003677:DNA binding][GO:0005634:nucleus][GO:0005634:nucleus][GO:0005654:nucleoplasm][GO:0048471:perinuclear region of cytoplasm][GO:0003723:RNA binding][GO:0005737:cytoplasm][GO:0005737:cytoplasm][GO:0045944:positive regulation of transcription by RNA polymerase II][GO:0006281:DNA repair][GO:0006974:cellular response to DNA damage stimulus][GO:0001228:DNA-binding transcription activator activ…	-	MYB
ENSMUSG00000054452	10	81559488	81566362	8652	+	Aes	1051.61	1281.4	1598.55	3417.54	4112.1	4014.85	31.328	38.3832	46.3653	94.394	112.846	109.787	2579.34	-1.55494	2.24244e-18	1.72174e-16	DOWN	amino-terminal enhancer of split [Source:MGI Symbol;Acc:MGI:95806]	[GO:0006355:regulation of transcription, DNA-templated][GO:0005634:nucleus][GO:0005515:protein binding][GO:0005634:nucleus][GO:0005634:nucleus][GO:0005634:nucleus][GO:0005515:protein binding][GO:0042802:identical protein binding][GO:0016055:Wnt signaling pathway][GO:0010629:negative regulation of gene expression][GO:0032091:negative regulation of protein binding][GO:0000122:negative regulation of…	-	-
ENSMUSG00000025557	14	121459621	121505252	6350	-	Slc15a1	11.3451	19.0271	44.146	263.373	257.472	251.487	0.222214	0.374723	0.841861	4.78283	4.64554	4.52145	141.142	-3.4127	2.85434e-18	2.18338e-16	DOWN	solute carrier family 15 (oligopeptide transporter), member 1 [Source:MGI Symbol;Acc:MGI:1861376]	[GO:0016021:integral component of membrane][GO:0016020:membrane][GO:0022857:transmembrane transporter activity][GO:0055085:transmembrane transport][GO:0005215:transporter activity][GO:0035673:oligopeptide transmembrane transporter activity][GO:0006857:oligopeptide transport][GO:0015031:protein transport][GO:0005887:integral component of plasma membrane][GO:0016020:membrane][GO:0016021:integral co…	-	-
ENSMUSG00000031163	X	8004200	8018492	673	-	Glod5	41.017	75.3765	52.2782	315.687	295.774	389.357	3.8546	7.12242	4.78324	27.5057	25.6046	33.5865	194.915	-2.55911	3.25828e-18	2.48312e-16	DOWN	glyoxalase domain containing 5 [Source:MGI Symbol;Acc:MGI:1917074]	[GO:0003674:molecular_function][GO:0008150:biological_process][GO:0005575:cellular_component]	-	-
ENSMUSG00000001930	6	125546774	125686679	29295	+	Vwf	238.248	167.585	192.849	737.807	694.749	643.397	1.70569	1.20638	1.34424	4.8974	4.58189	4.22817	445.772	-1.79557	3.71767e-18	2.82275e-16	DOWN	Von Willebrand factor [Source:MGI Symbol;Acc:MGI:98941]	[GO:0005515:protein binding][GO:0005576:extracellular region][GO:0002020:protease binding][GO:0005178:integrin binding][GO:0005518:collagen binding][GO:0019865:immunoglobulin binding][GO:0042802:identical protein binding][GO:0042803:protein homodimerization activity][GO:0047485:protein N-terminus binding][GO:0051087:chaperone binding][GO:0007155:cell adhesion][GO:0007596:blood coagulation][GO:000…	-	-
ENSMUSG00000016534	X	38401357	38456454	13060	-	Lamp2	1549.05	1473.13	1056.02	3992.99	3533.32	4028.89	27.1838	25.9935	18.0428	64.9673	57.1179	64.898	2605.57	-1.50128	3.90954e-18	2.9575e-16	DOWN	lysosomal-associated membrane protein 2 [Source:MGI Symbol;Acc:MGI:96748]	[GO:0016020:membrane][GO:0016021:integral component of membrane][GO:0005615:extracellular space][GO:0005886:plasma membrane][GO:0048471:perinuclear region of cytoplasm][GO:0006914:autophagy][GO:0006914:autophagy][GO:0031410:cytoplasmic vesicle][GO:0005886:plasma membrane][GO:0016020:membrane][GO:0005515:protein binding][GO:0005768:endosome][GO:0005768:endosome][GO:0005764:lysosome][GO:0005765:lys…	-	-
ENSMUSG00000031950	8	111940703	111953612	3133	+	Gabarapl2	881.429	859.145	1043.24	2341.5	2407.68	2203.38	33.2418	32.5792	38.3061	81.8732	83.645	76.2759	1622.73	-1.32204	4.03683e-18	3.04271e-16	DOWN	gamma-aminobutyric acid (GABA) A receptor-associated protein-like 2 [Source:MGI Symbol;Acc:MGI:1890602]	[GO:0005794:Golgi apparatus][GO:0005794:Golgi apparatus][GO:0005829:cytosol][GO:0005737:cytoplasm][GO:0006914:autophagy][GO:0015031:protein transport][GO:0031410:cytoplasmic vesicle][GO:0005515:protein binding][GO:0031625:ubiquitin protein ligase binding][GO:0000045:autophagosome assembly][GO:0000139:Golgi membrane][GO:0000139:Golgi membrane][GO:0000422:autophagy of mitochondrion][GO:0005776:auto…	-	-
ENSMUSG00000029710	5	137350109	137378669	20055	+	Ephb4	935.537	913.299	873.627	2201.69	2161.91	2043.81	13.6333	13.3823	12.3952	29.7473	29.0217	27.3389	1521.65	-1.23464	5.08018e-18	3.78727e-16	DOWN	Eph receptor B4 [Source:MGI Symbol;Acc:MGI:104757]	[GO:0016021:integral component of membrane][GO:0005524:ATP binding][GO:0005515:protein binding][GO:0006468:protein phosphorylation][GO:0005887:integral component of plasma membrane][GO:0004672:protein kinase activity][GO:0005003:ephrin receptor activity][GO:0007169:transmembrane receptor protein tyrosine kinase signaling pathway][GO:0004713:protein tyrosine kinase activity][GO:0016020:membrane][G…	[mmu04360:Axon guidance]	-
ENSMUSG00000011256	11	46055992	46147343	9399	+	Adam19	690.308	614.721	428.681	2000.56	1670.38	1897	6.83987	6.12435	4.13548	18.3784	15.2463	17.2533	1216.94	-1.68088	5.24113e-18	3.89313e-16	DOWN	a disintegrin and metallopeptidase domain 19 (meltrin beta) [Source:MGI Symbol;Acc:MGI:105377]	[GO:0016021:integral component of membrane][GO:0006508:proteolysis][GO:0005794:Golgi apparatus][GO:0004222:metalloendopeptidase activity][GO:0008237:metallopeptidase activity][GO:0017124:SH3 domain binding][GO:0006509:membrane protein ectodomain proteolysis][GO:0016020:membrane][GO:0046872:metal ion binding][GO:0016787:hydrolase activity][GO:0005634:nucleus][GO:0005634:nucleus][GO:0005794:Golgi a…	-	-
ENSMUSG00000079627	X	37668989	37673277	1274	-	Rhox2h	1.7454	1.46362	9.2939	133.491	132.992	117.446	0.141706	0.119481	0.734645	10.0483	9.94629	8.75245	66.0718	-5.09269	5.73707e-18	4.24615e-16	DOWN	reproductive homeobox 2H [Source:MGI Symbol;Acc:MGI:3713490]	[GO:0003677:DNA binding][GO:0008150:biological_process][GO:0005575:cellular_component][GO:0003677:DNA binding][GO:0008150:biological_process][GO:0005575:cellular_component][GO:0005634:nucleus]	-	Homeobox
ENSMUSG00000050332	X	95420318	95444872	8496	-	Amer1	346.463	344.683	195.172	1256.44	1012.86	1165.52	2.57912	2.57995	1.41455	8.67175	6.94562	7.96408	720.19	-1.94933	6.08309e-18	4.47805e-16	DOWN	APC membrane recruitment 1 [Source:MGI Symbol;Acc:MGI:1919595]	[GO:0016020:membrane][GO:0005886:plasma membrane][GO:0005886:plasma membrane][GO:0005634:nucleus][GO:0016604:nuclear body][GO:0005737:cytoplasm][GO:0005886:plasma membrane][GO:0016055:Wnt signaling pathway][GO:0005886:plasma membrane][GO:0008289:lipid binding][GO:0043231:intracellular membrane-bounded organelle][GO:0001822:kidney development][GO:0060348:bone development][GO:0005546:phosphatidylin…	-	-
ENSMUSG00000024764	19	7225668	7241183	16637	-	Naa40	830.813	674.729	652.897	1997.85	1894.87	1802.53	11.625	9.49288	8.89452	25.9182	24.4238	23.1513	1308.95	-1.39943	6.11375e-18	4.49257e-16	DOWN	N(alpha)-acetyltransferase 40, NatD catalytic subunit [Source:MGI Symbol;Acc:MGI:1918249]	[GO:0010485:H4 histone acetyltransferase activity][GO:0043998:H2A histone acetyltransferase activity][GO:0016740:transferase activity][GO:0005575:cellular_component][GO:0005634:nucleus][GO:0005737:cytoplasm][GO:0006629:lipid metabolic process][GO:0016746:transferase activity, transferring acyl groups][GO:0043967:histone H4 acetylation][GO:0043967:histone H4 acetylation][GO:0010485:H4 histone acet…	-	-
ENSMUSG00000039713	4	152072498	152115400	19269	+	Plekhg5	582.965	586.18	442.622	1497.26	1504.4	1477.01	8.96425	9.06315	6.6266	21.3461	21.3098	20.8475	1015.07	-1.47184	6.17892e-18	4.53235e-16	DOWN	pleckstrin homology domain containing, family G (with RhoGef domain) member 5 [Source:MGI Symbol;Acc:MGI:2652860]	[GO:0005089:Rho guanyl-nucleotide exchange factor activity][GO:0035023:regulation of Rho protein signal transduction][GO:0005089:Rho guanyl-nucleotide exchange factor activity][GO:0035023:regulation of Rho protein signal transduction][GO:0005089:Rho guanyl-nucleotide exchange factor activity][GO:0035023:regulation of Rho protein signal transduction][GO:0016020:membrane][GO:0005886:plasma membrane…	-	-
ENSMUSG00000073406	17	36080115	36084223	9437	-	H2-Bl	244.357	159.535	281.141	835.219	862.85	866.799	13.5804	8.91496	15.2124	43.0367	44.174	44.2188	541.65	-1.91078	7.73737e-18	5.64526e-16	DOWN	histocompatibility 2, blastocyst [Source:MGI Symbol;Acc:MGI:892004]	[GO:0009897:external side of plasma membrane][GO:0006955:immune response][GO:0005615:extracellular space][GO:0005886:plasma membrane][GO:0005102:signaling receptor binding][GO:0042605:peptide antigen binding][GO:0001916:positive regulation of T cell mediated cytotoxicity][GO:0002476:antigen processing and presentation of endogenous peptide antigen via MHC class Ib][GO:0002486:antigen processing a…	-	-
ENSMUSG00000108981	X	161287456	161366252	12017	+	Gm15262	6.10892	13.9044	20.9113	168.667	148.951	183.828	0.0771181	0.17649	0.257016	1.97412	1.73212	2.13012	90.3951	-3.64547	9.84316e-18	7.131e-16	DOWN	predicted gene 15262 [Source:MGI Symbol;Acc:MGI:3705232]	[GO:0003674:molecular_function][GO:0008150:biological_process][GO:0005575:cellular_component][GO:0003674:molecular_function][GO:0008150:biological_process][GO:0005575:cellular_component][GO:0003674:molecular_function][GO:0008150:biological_process][GO:0005575:cellular_component][GO:0003674:molecular_function][GO:0008150:biological_process][GO:0005575:cellular_component][GO:0003674:molecular_funct…	-	-
ENSMUSG00000032470	9	99385420	99437381	8368	-	Mras	45.3805	24.1497	27.8817	196.628	278.751	251.487	0.610533	0.326685	0.365213	2.45265	3.45461	3.10567	137.38	-2.89852	1.06672e-17	7.71439e-16	DOWN	muscle and microspikes RAS [Source:MGI Symbol;Acc:MGI:1100856]	[GO:0007165:signal transduction][GO:0016020:membrane][GO:0005525:GTP binding][GO:0003924:GTPase activity][GO:0005886:plasma membrane][GO:0000166:nucleotide binding][GO:0005886:plasma membrane][GO:0003924:GTPase activity][GO:0005525:GTP binding][GO:0030742:GTP-dependent protein binding][GO:1990830:cellular response to leukemia inhibitory factor][GO:0019003:GDP binding][GO:0030742:GTP-dependent pro…	-	-
ENSMUSG00000024006	17	28970880	29007995	33125	-	Stk38	1962.71	1765.13	1686.84	4655.94	3974.86	4142.51	37.0103	33.4672	30.9691	81.4001	69.045	71.702	3031.33	-1.23807	1.07808e-17	7.78286e-16	DOWN	serine/threonine kinase 38 [Source:MGI Symbol;Acc:MGI:2442572]	[GO:0005524:ATP binding][GO:0006468:protein phosphorylation][GO:0004674:protein serine/threonine kinase activity][GO:0004672:protein kinase activity][GO:0016740:transferase activity][GO:0046872:metal ion binding][GO:0005634:nucleus][GO:0005634:nucleus][GO:0005634:nucleus][GO:0005829:cytosol][GO:0005737:cytoplasm][GO:0005737:cytoplasm][GO:0005737:cytoplasm][GO:0000166:nucleotide binding][GO:000552…	-	-
ENSMUSG00000031889	8	105225145	105253053	11897	+	D230025D16Rik	783.687	764.01	551.826	2024.91	1926.78	1958.28	16.876	16.5425	11.5695	40.428	38.2211	38.708	1334.92	-1.49089	1.09256e-17	7.87351e-16	DOWN	RIKEN cDNA D230025D16 gene [Source:MGI Symbol;Acc:MGI:2443049]	[GO:0016020:membrane][GO:0005802:trans-Golgi network][GO:0030425:dendrite][GO:0030425:dendrite][GO:0030672:synaptic vesicle membrane][GO:0030165:PDZ domain binding][GO:0005802:trans-Golgi network][GO:0035254:glutamate receptor binding][GO:0030672:synaptic vesicle membrane][GO:0043001:Golgi to plasma membrane protein transport][GO:0043001:Golgi to plasma membrane protein transport]	-	-
ENSMUSG00000031337	X	71210767	71315691	38560	+	Mtm1	131.778	137.58	44.146	691.806	641.552	663.822	2.02734	2.12822	0.661243	9.86774	9.09198	9.37422	385.114	-2.65851	1.11689e-17	8.03479e-16	DOWN	X-linked myotubular myopathy gene 1 [Source:MGI Symbol;Acc:MGI:1099452]	[GO:0046856:phosphatidylinositol dephosphorylation][GO:0004438:phosphatidylinositol-3-phosphatase activity][GO:0052629:phosphatidylinositol-3,5-bisphosphate 3-phosphatase activity][GO:0008333:endosome to lysosome transport][GO:0044088:regulation of vacuole organization][GO:0045109:intermediate filament organization][GO:0046716:muscle cell cellular homeostasis][GO:0048311:mitochondrion distributio…	[mmu00562:Inositol phosphate metabolism][mmu04070:Phosphatidylinositol signaling system]	-
ENSMUSG00000005373	5	135089890	135138382	20830	+	Mlxipl	166.686	162.462	151.026	562.826	491.537	546.377	2.91059	2.8524	2.56755	9.11184	7.90646	8.75739	346.819	-1.73553	1.18063e-17	8.47842e-16	DOWN	MLX interacting protein-like [Source:MGI Symbol;Acc:MGI:1927999]	[GO:0005634:nucleus][GO:0045944:positive regulation of transcription by RNA polymerase II][GO:0042593:glucose homeostasis][GO:0005737:cytoplasm][GO:0003677:DNA binding][GO:0005634:nucleus][GO:0005634:nucleus][GO:0005829:cytosol][GO:0005634:nucleus][GO:0005737:cytoplasm][GO:0046982:protein heterodimerization activity][GO:0003700:DNA-binding transcription factor activity][GO:0046983:protein dimeriz…	-	bHLH
ENSMUSG00000005148	14	99298691	99315036	6204	+	Klf5	1573.48	1514.12	923.582	4262.68	4009.97	4461.65	29.6885	28.7251	16.9663	74.5692	69.6964	77.2721	2790.91	-1.66518	1.25253e-17	8.96341e-16	DOWN	Kruppel-like factor 5 [Source:MGI Symbol;Acc:MGI:1338056]	[GO:0006355:regulation of transcription, DNA-templated][GO:0003700:DNA-binding transcription factor activity][GO:0003676:nucleic acid binding][GO:0046872:metal ion binding][GO:0003677:DNA binding][GO:0005634:nucleus][GO:0005634:nucleus][GO:0005654:nucleoplasm][GO:0005794:Golgi apparatus][GO:0005634:nucleus][GO:0010468:regulation of gene expression][GO:0005515:protein binding][GO:0045944:positive …	-	zf-C2H2
ENSMUSG00000079349	X	155053061	155063145	2923	-	Magea5	0	2.92724	0	148.824	130.864	177.445	0	0.119099	0	5.58335	4.87792	6.59075	76.6767	-7.03503	1.30718e-17	9.32207e-16	DOWN	melanoma antigen, family A, 5 [Source:MGI Symbol;Acc:MGI:1333838]	[GO:0003674:molecular_function][GO:0008150:biological_process][GO:0005575:cellular_component][GO:0003674:molecular_function][GO:0008150:biological_process][GO:0005575:cellular_component]	-	-
ENSMUSG00000074272	7	25461707	25477603	20930	-	Ceacam1	33.1627	49.7631	26.72	269.687	217.042	255.316	0.573685	0.865582	0.450035	4.32549	3.4587	4.05418	141.949	-2.73943	1.51894e-17	1.07205e-15	DOWN	carcinoembryonic antigen-related cell adhesion molecule 1 [Source:MGI Symbol;Acc:MGI:1347245]	[GO:0016020:membrane][GO:0016021:integral component of membrane][GO:0009897:external side of plasma membrane][GO:0005886:plasma membrane][GO:0009986:cell surface][GO:0030054:cell junction][GO:0030054:cell junction][GO:0031410:cytoplasmic vesicle][GO:0003779:actin binding][GO:0042802:identical protein binding][GO:0042803:protein homodimerization activity][GO:0005886:plasma membrane][GO:0005886:pla…	-	-
ENSMUSG00000050197	X	38121219	38129967	876	+	Rhox13	143.996	204.907	194.01	641.296	640.488	598.717	10.3962	14.8751	13.6376	42.9275	42.5972	39.6778	403.902	-1.79272	1.59862e-17	1.12635e-15	DOWN	reproductive homeobox 13 [Source:MGI Symbol;Acc:MGI:1920864]	[GO:0003677:DNA binding][GO:0006355:regulation of transcription, DNA-templated][GO:0043565:sequence-specific DNA binding][GO:0005634:nucleus][GO:0005634:nucleus][GO:0005634:nucleus][GO:0000977:RNA polymerase II regulatory region sequence-specific DNA binding][GO:0000981:DNA-binding transcription factor activity, RNA polymerase II-specific][GO:0006357:regulation of transcription by RNA polymerase …	-	Homeobox
ENSMUSG00000085757	X	62510539	62527011	1341	-	Tslrn1	6.98162	2.19543	0	119.961	114.905	125.105	0.591106	0.186899	0	9.41675	8.96173	9.72265	61.5247	-5.22199	1.70943e-17	1.20031e-15	DOWN	testis specific long noncoding RNA 1 [Source:MGI Symbol;Acc:MGI:1922795]	-	-	-
ENSMUSG00000056124	18	20684599	20746404	5808	-	B4galt6	1146.73	988.676	709.822	2995.42	2752.4	2720.4	12.4872	10.8252	7.52557	30.2421	27.6095	27.1917	1885.57	-1.57205	1.73901e-17	1.219e-15	DOWN	UDP-Gal:betaGlcNAc beta 1,4-galactosyltransferase, polypeptide 6 [Source:MGI Symbol;Acc:MGI:1928380]	[GO:0005975:carbohydrate metabolic process][GO:0016757:transferase activity, transferring glycosyl groups][GO:0016020:membrane][GO:0016021:integral component of membrane][GO:0016740:transferase activity][GO:0005794:Golgi apparatus][GO:0046872:metal ion binding][GO:0005575:cellular_component][GO:0006629:lipid metabolic process][GO:0006665:sphingolipid metabolic process][GO:0032580:Golgi cisterna m…	[mmu00600:Sphingolipid metabolism]	-
ENSMUSG00000037405	9	21015985	21028817	4738	+	Icam1	1639.81	1611.45	1545.11	3472.56	3823.78	3437.83	40.9115	40.4245	37.5317	80.3254	87.8797	78.7295	2588.42	-1.162	1.9424e-17	1.35925e-15	DOWN	intercellular adhesion molecule 1 [Source:MGI Symbol;Acc:MGI:96392]	[GO:0016020:membrane][GO:0098609:cell-cell adhesion][GO:0016021:integral component of membrane][GO:0001772:immunological synapse][GO:0005615:extracellular space][GO:0009897:external side of plasma membrane][GO:0009986:cell surface][GO:0005887:integral component of plasma membrane][GO:0005886:plasma membrane][GO:0098609:cell-cell adhesion][GO:0007155:cell adhesion][GO:0007155:cell adhesion][GO:004…	-	-
ENSMUSG00000030087	6	90462576	90475238	11014	+	Klf15	335.118	270.77	340.389	864.081	925.622	957.436	8.53936	6.93754	8.44482	20.4143	21.7273	22.3944	615.569	-1.53983	2.21846e-17	1.54979e-15	DOWN	Kruppel-like factor 15 [Source:MGI Symbol;Acc:MGI:1929988]	[GO:0003676:nucleic acid binding][GO:0046872:metal ion binding][GO:0003677:DNA binding][GO:0005634:nucleus][GO:0005634:nucleus][GO:0005634:nucleus][GO:0005634:nucleus][GO:0005515:protein binding][GO:0045944:positive regulation of transcription by RNA polymerase II][GO:0045893:positive regulation of transcription, DNA-templated][GO:0000978:RNA polymerase II proximal promoter sequence-specific DNA …	-	zf-C2H2
ENSMUSG00000054662	7	141101212	141117806	11529	-	Ano9	307.191	364.442	309.022	882.121	970.308	894.884	6.24308	7.44723	6.11458	16.6215	18.1653	16.6939	621.328	-1.48415	4.21668e-17	2.91597e-15	DOWN	anoctamin 9 [Source:MGI Symbol;Acc:MGI:1918595]	[GO:0061588:calcium activated phospholipid scrambling][GO:0016020:membrane][GO:0016021:integral component of membrane][GO:0005886:plasma membrane][GO:0005886:plasma membrane][GO:0034220:ion transmembrane transport][GO:0006869:lipid transport][GO:0061590:calcium activated phosphatidylcholine scrambling][GO:0061591:calcium activated galactosylceramide scrambling][GO:0017128:phospholipid scramblase …	-	-
ENSMUSG00000020689	11	104608000	104670476	10159	+	Itgb3	142.25	102.453	102.233	471.727	452.172	423.825	1.55545	1.12643	1.08838	4.78237	4.55459	4.25392	282.443	-1.95685	5.09297e-17	3.50425e-15	DOWN	integrin beta 3 [Source:MGI Symbol;Acc:MGI:96612]	[GO:0007155:cell adhesion][GO:0008305:integrin complex][GO:0007229:integrin-mediated signaling pathway][GO:0005178:integrin binding][GO:0070527:platelet aggregation][GO:0030335:positive regulation of cell migration][GO:0016020:membrane][GO:0016021:integral component of membrane][GO:0009897:external side of plasma membrane][GO:0005886:plasma membrane][GO:0005634:nucleus][GO:0009986:cell surface][G…	-	-
ENSMUSG00000031508	8	11611583	11635757	19170	-	Ankrd10	751.397	707.661	676.132	1861.65	1599.09	1748.92	9.21693	8.72808	8.07486	21.1722	18.069	19.6919	1224.14	-1.28647	5.38891e-17	3.70168e-15	DOWN	ankyrin repeat domain 10 [Source:MGI Symbol;Acc:MGI:1921840]	[GO:0005515:protein binding][GO:0005515:protein binding][GO:0003674:molecular_function][GO:0005575:cellular_component][GO:0005515:protein binding]	-	-
ENSMUSG00000048402	1	118834132	119053619	14104	-	Gli2	203.34	201.98	69.7043	1016.51	876.681	828.502	1.93767	1.93527	0.646702	8.98094	7.69562	7.2469	532.787	-2.50986	6.04131e-17	4.14288e-15	DOWN	GLI-Kruppel family member GLI2 [Source:MGI Symbol;Acc:MGI:95728]	[GO:0003676:nucleic acid binding][GO:0046872:metal ion binding][GO:0003677:DNA binding][GO:0005634:nucleus][GO:0005634:nucleus][GO:0005634:nucleus][GO:0005515:protein binding][GO:0005737:cytoplasm][GO:0005737:cytoplasm][GO:0005737:cytoplasm][GO:0007275:multicellular organism development][GO:0045944:positive regulation of transcription by RNA polymerase II][GO:0045944:positive regulation of transc…	-	zf-C2H2
ENSMUSG00000078706	11	96251105	96264868	5305	+	Gm53	111.706	98.7944	74.3512	445.57	360.674	397.017	2.16914	1.92895	1.40568	8.02193	6.45164	7.07656	248.019	-2.07232	6.74718e-17	4.61923e-15	DOWN	predicted gene 53 [Source:MGI Symbol;Acc:MGI:2684899]	-	-	-
ENSMUSG00000021998	14	75131101	75230842	18090	+	Lcp1	121.306	142.703	119.659	478.041	525.583	405.953	1.99741	2.36263	1.91831	7.29796	7.97207	6.13567	298.874	-1.8749	7.33861e-17	4.99914e-15	DOWN	lymphocyte cytosolic protein 1 [Source:MGI Symbol;Acc:MGI:104808]	[GO:0005509:calcium ion binding][GO:0051015:actin filament binding][GO:0051017:actin filament bundle assembly][GO:0005509:calcium ion binding][GO:0051015:actin filament binding][GO:0051017:actin filament bundle assembly][GO:0005509:calcium ion binding][GO:0051015:actin filament binding][GO:0051017:actin filament bundle assembly][GO:0005515:protein binding][GO:0005509:calcium ion binding][GO:00510…	-	-
ENSMUSG00000063952	17	28801090	28839949	48251	+	Brpf3	729.579	538.612	424.034	2025.81	1725.7	1728.49	6.43641	4.77776	3.64216	16.5699	14.0243	13.9971	1195.37	-1.6937	7.38743e-17	5.02407e-15	DOWN	bromodomain and PHD finger containing, 3 [Source:MGI Symbol;Acc:MGI:2146836]	[GO:0005515:protein binding][GO:0046872:metal ion binding][GO:0003674:molecular_function][GO:0043966:histone H3 acetylation][GO:0070776:MOZ/MORF histone acetyltransferase complex][GO:0043966:histone H3 acetylation][GO:0070776:MOZ/MORF histone acetyltransferase complex][GO:0005515:protein binding][GO:0046872:metal ion binding][GO:0003674:molecular_function][GO:0043966:histone H3 acetylation][GO:00…	-	-
ENSMUSG00000035967	X	56454857	56507843	24841	+	Ints6l	322.027	338.828	210.275	1033.65	883.065	1049.35	2.84056	3.00516	1.80586	8.45348	7.17542	8.49634	639.533	-1.76244	8.06409e-17	5.45714e-15	DOWN	integrator complex subunit 6 like [Source:MGI Symbol;Acc:MGI:2442593]	[GO:0003674:molecular_function][GO:0034472:snRNA 3'-end processing][GO:0032039:integrator complex][GO:0003674:molecular_function][GO:0034472:snRNA 3'-end processing][GO:0032039:integrator complex][GO:0003674:molecular_function][GO:0034472:snRNA 3'-end processing][GO:0032039:integrator complex]	-	-
ENSMUSG00000026179	1	74284930	74353694	14921	+	Pnkd	623.109	630.089	687.749	1495.46	1533.13	1695.3	10.95	11.1334	11.767	24.3653	24.8182	27.3461	1110.81	-1.28369	9.38614e-17	6.29991e-15	DOWN	paroxysmal nonkinesiogenic dyskinesia [Source:MGI Symbol;Acc:MGI:1930773]	[GO:0016020:membrane][GO:0016021:integral component of membrane][GO:0004416:hydroxyacylglutathione hydrolase activity][GO:0019243:methylglyoxal catabolic process to D-lactate via S-lactoyl-glutathione][GO:0016020:membrane][GO:0046872:metal ion binding][GO:0016787:hydrolase activity][GO:0005634:nucleus][GO:0005515:protein binding][GO:0005737:cytoplasm][GO:0016020:membrane][GO:0005739:mitochondrion…	-	-
ENSMUSG00000095698	X	37493428	37497623	685	+	Rhox2d	6.10892	6.58629	3.48521	96.5101	108.521	130.211	0.564032	0.611445	0.313296	8.26158	9.22992	11.0354	58.5705	-4.33163	9.90593e-17	6.63794e-15	DOWN	reproductive homeobox 2D [Source:MGI Symbol;Acc:MGI:3648779]	[GO:0003677:DNA binding][GO:0008150:biological_process][GO:0005575:cellular_component][GO:0005634:nucleus]	-	Homeobox
ENSMUSG00000020634	12	4879032	4907705	5807	-	Ubxn2a	736.561	780.11	614.559	1786.79	1707.61	1882.96	17.279	18.4011	14.0366	38.8628	36.9015	40.5463	1251.43	-1.33317	1.04159e-16	6.96828e-15	DOWN	UBX domain protein 2A [Source:MGI Symbol;Acc:MGI:2442310]	[GO:0005515:protein binding][GO:0005829:cytosol][GO:0005829:cytosol][GO:0010468:regulation of gene expression][GO:0043161:proteasome-mediated ubiquitin-dependent protein catabolic process][GO:0005783:endoplasmic reticulum][GO:0043130:ubiquitin binding][GO:0000045:autophagosome assembly][GO:1990830:cellular response to leukemia inhibitory factor][GO:0007030:Golgi organization][GO:0005801:cis-Golgi…	-	-
ENSMUSG00000016319	X	36795651	36798807	2994	+	Slc25a5	4767.57	4908.98	6042.2	11367.5	12610.8	12347.1	243.168	251.754	300.047	537.554	592.509	578.061	8674.02	-1.20877	1.05456e-16	7.04358e-15	DOWN	solute carrier family 25 (mitochondrial carrier, adenine nucleotide translocator), member 5 [Source:MGI Symbol;Acc:MGI:1353496]	[GO:0022857:transmembrane transporter activity][GO:0055085:transmembrane transport][GO:0005743:mitochondrial inner membrane][GO:0016020:membrane][GO:0016021:integral component of membrane][GO:0005739:mitochondrion][GO:0005739:mitochondrion][GO:0005739:mitochondrion][GO:1990830:cellular response to leukemia inhibitory factor][GO:0008284:positive regulation of cell population proliferation][GO:0045…	-	-
ENSMUSG00000027610	2	155563181	155592810	12005	-	Gss	466.896	463.968	616.883	1375.5	1404.39	1413.18	9.06356	9.05615	11.6592	24.7565	25.1137	25.1812	956.802	-1.44069	1.19727e-16	7.9323e-15	DOWN	glutathione synthetase [Source:MGI Symbol;Acc:MGI:95852]	[GO:0005524:ATP binding][GO:0006750:glutathione biosynthetic process][GO:0016874:ligase activity][GO:0004363:glutathione synthase activity][GO:0046872:metal ion binding][GO:0005829:cytosol][GO:0005829:cytosol][GO:0000166:nucleotide binding][GO:0005524:ATP binding][GO:0042802:identical protein binding][GO:0042803:protein homodimerization activity][GO:0006750:glutathione biosynthetic process][GO:00…	[mmu00480:Glutathione metabolism]	-
ENSMUSG00000023022	15	99778470	99875456	12391	-	Lima1	2153.83	2003.7	1171.03	5959.28	5500.54	5585.04	32.1047	30.0307	16.9947	82.3571	75.5277	76.416	3728.9	-1.6765	1.34538e-16	8.87067e-15	DOWN	LIM domain and actin binding 1 [Source:MGI Symbol;Acc:MGI:1920992]	[GO:0051015:actin filament binding][GO:0051017:actin filament bundle assembly][GO:0030835:negative regulation of actin filament depolymerization][GO:0016020:membrane][GO:0046872:metal ion binding][GO:0005886:plasma membrane][GO:0005829:cytosol][GO:0005515:protein binding][GO:0005737:cytoplasm][GO:0005925:focal adhesion][GO:0005886:plasma membrane][GO:0005886:plasma membrane][GO:0005856:cytoskelet…	-	-
ENSMUSG00000040606	4	142102390	142239401	22066	-	Kazn	924.192	838.655	715.631	2089.85	2059.78	1976.15	10.2098	9.31568	7.69715	21.4053	20.9613	20.0389	1434.04	-1.30429	1.35612e-16	8.92713e-15	DOWN	kazrin, periplakin interacting protein [Source:MGI Symbol;Acc:MGI:1918779]	[GO:0005515:protein binding][GO:0005634:nucleus][GO:0005654:nucleoplasm][GO:0005829:cytosol][GO:0005737:cytoplasm][GO:0030054:cell junction][GO:0005856:cytoskeleton][GO:0016607:nuclear speck][GO:0001533:cornified envelope][GO:0030057:desmosome][GO:0031424:keratinization]	-	-
ENSMUSG00000024525	18	67289186	67322472	6152	+	Impa2	1350.07	1282.86	1433.58	3132.52	3249.25	2831.46	16.8947	16.1418	17.4665	36.3446	37.4561	32.5241	2213.29	-1.1807	1.387e-16	9.10124e-15	DOWN	inositol (myo)-1(or 4)-monophosphatase 2 [Source:MGI Symbol;Acc:MGI:2149728]	[GO:0046854:phosphatidylinositol phosphorylation][GO:0046855:inositol phosphate dephosphorylation][GO:0008934:inositol monophosphate 1-phosphatase activity][GO:0046872:metal ion binding][GO:0016787:hydrolase activity][GO:0005737:cytoplasm][GO:0042803:protein homodimerization activity][GO:0052832:inositol monophosphate 3-phosphatase activity][GO:0052833:inositol monophosphate 4-phosphatase activit…	[mmu00562:Inositol phosphate metabolism][mmu04070:Phosphatidylinositol signaling system]	-
ENSMUSG00000078532	4	130531602	130574173	2548	-	Nkain1	243.484	249.547	177.746	674.669	750.073	726.375	12.8114	13.2025	9.10567	32.913	36.3558	35.0822	470.316	-1.67574	1.51201e-16	9.8742e-15	DOWN	Na+/K+ transporting ATPase interacting 1 [Source:MGI Symbol;Acc:MGI:1914399]	[GO:0016020:membrane][GO:0016021:integral component of membrane][GO:0016020:membrane][GO:0016021:integral component of membrane][GO:0005886:plasma membrane][GO:0005886:plasma membrane][GO:0051117:ATPase binding][GO:0002028:regulation of sodium ion transport]	-	-
ENSMUSG00000025232	9	59539540	59565109	1996	+	Hexa	2326.62	2540.11	2854.39	5385.63	6500.64	6169.72	73.7218	80.9281	88.0581	158.218	189.744	179.447	4296.18	-1.22587	1.6552e-16	1.0741e-14	DOWN	hexosaminidase A [Source:MGI Symbol;Acc:MGI:96073]	[GO:0005975:carbohydrate metabolic process][GO:0004553:hydrolase activity, hydrolyzing O-glycosyl compounds][GO:0004563:beta-N-acetylhexosaminidase activity][GO:0016787:hydrolase activity][GO:0016798:hydrolase activity, acting on glycosyl bonds][GO:0008152:metabolic process][GO:0046982:protein heterodimerization activity][GO:0016020:membrane][GO:0005764:lysosome][GO:0007605:sensory perception of …	[mmu00511:Other glycan degradation][mmu00520:Amino sugar and nucleotide sugar metabolism][mmu00531:Glycosaminoglycan degradation][mmu00603:Glycosphingolipid biosynthesis - globo and isoglobo series][mmu00604:Glycosphingolipid biosynthesis - ganglio series][mmu04142:Lysosome]	-
ENSMUSG00000031295	X	160502166	160598878	21611	+	Phka2	359.553	432.5	460.048	1086.87	1156.5	1102.97	5.23846	6.33582	6.52575	14.6814	15.5213	14.7504	766.405	-1.41943	1.86894e-16	1.2033e-14	DOWN	phosphorylase kinase alpha 2 [Source:MGI Symbol;Acc:MGI:97577]	[GO:0003824:catalytic activity][GO:0005516:calmodulin binding][GO:0005977:glycogen metabolic process][GO:0016020:membrane][GO:0005886:plasma membrane][GO:0006468:protein phosphorylation][GO:0005975:carbohydrate metabolic process][GO:0004689:phosphorylase kinase activity][GO:0005964:phosphorylase kinase complex][GO:0004689:phosphorylase kinase activity][GO:0005964:phosphorylase kinase complex][GO:…	-	-
ENSMUSG00000038533	2	154436481	154539356	23174	+	Cbfa2t2	1157.2	1039.9	662.191	2913.34	2894.96	2954.01	12.0375	10.8767	6.7065	28.0976	27.7404	28.2058	1936.94	-1.61383	2.05067e-16	1.31618e-14	DOWN	CBFA2/RUNX1 translocation partner 2 [Source:MGI Symbol;Acc:MGI:1333833]	[GO:0006355:regulation of transcription, DNA-templated][GO:0003700:DNA-binding transcription factor activity][GO:0003714:transcription corepressor activity][GO:0045892:negative regulation of transcription, DNA-templated][GO:0046872:metal ion binding][GO:0006355:regulation of transcription, DNA-templated][GO:0003700:DNA-binding transcription factor activity][GO:0003714:transcription corepressor ac…	-	-
ENSMUSG00000010592	17	50279395	50293636	8707	-	Dazl	246.975	407.618	164.967	1197.81	1127.77	1326.37	5.24867	8.71019	3.41335	23.6013	22.0781	25.8739	745.251	-2.14925	2.41897e-16	1.54292e-14	DOWN	deleted in azoospermia-like [Source:MGI Symbol;Acc:MGI:1342328]	[GO:0003723:RNA binding][GO:0003676:nucleic acid binding][GO:0003729:mRNA binding][GO:0003730:mRNA 3'-UTR binding][GO:0008494:translation activator activity][GO:0007281:germ cell development][GO:0045727:positive regulation of translation][GO:0003723:RNA binding][GO:0003676:nucleic acid binding][GO:0003729:mRNA binding][GO:0003730:mRNA 3'-UTR binding][GO:0008494:translation activator activity][GO:…	-	-
ENSMUSG00000079350	X	154985775	154995850	1646	-	Magea8	0	0	0	165.961	185.124	179.998	0	0	0	5.91232	6.55251	6.34846	88.514	-10.0536	2.46851e-16	1.57208e-14	DOWN	melanoma antigen, family A, 8 [Source:MGI Symbol;Acc:MGI:1333827]	[GO:0003674:molecular_function][GO:0008150:biological_process][GO:0005575:cellular_component]	-	-
ENSMUSG00000029171	5	64092950	64128351	4319	+	Pgm2	884.047	952.085	838.775	2065.5	1992.75	2038.7	23.6015	25.5575	21.802	51.1258	49.0073	49.9596	1461.98	-1.1877	2.84791e-16	1.79423e-14	DOWN	phosphoglucomutase 2 [Source:MGI Symbol;Acc:MGI:97564]	[GO:0005975:carbohydrate metabolic process][GO:0000287:magnesium ion binding][GO:0016868:intramolecular transferase activity, phosphotransferases][GO:0071704:organic substance metabolic process][GO:0046872:metal ion binding][GO:0005737:cytoplasm][GO:0016853:isomerase activity][GO:0006006:glucose metabolic process][GO:0006006:glucose metabolic process][GO:0004614:phosphoglucomutase activity][GO:00…	[mmu00010:Glycolysis / Gluconeogenesis][mmu00030:Pentose phosphate pathway][mmu00052:Galactose metabolism][mmu00230:Purine metabolism][mmu00500:Starch and sucrose metabolism][mmu00520:Amino sugar and nucleotide sugar metabolism]	-
ENSMUSG00000034160	X	101640060	101684351	19548	+	Ogt	2613.74	2497.67	1583.45	7755.99	5793.12	6843.75	30.7035	29.501	18.1099	84.472	62.6876	73.7938	4514.62	-1.60622	3.15081e-16	1.98202e-14	DOWN	O-linked N-acetylglucosamine (GlcNAc) transferase (UDP-N-acetylglucosamine:polypeptide-N-acetylglucosaminyl transferase) [Source:MGI Symbol;Acc:MGI:1339639]	[GO:0005515:protein binding][GO:0016757:transferase activity, transferring glycosyl groups][GO:0006493:protein O-linked glycosylation][GO:0016020:membrane][GO:0016740:transferase activity][GO:0005886:plasma membrane][GO:0005886:plasma membrane][GO:0005634:nucleus][GO:0005634:nucleus][GO:0005634:nucleus][GO:0005634:nucleus][GO:0005654:nucleoplasm][GO:0032991:protein-containing complex][GO:0005829:…	[mmu00514:Other types of O-glycan biosynthesis]	-
ENSMUSG00000009995	X	74281912	74290151	23241	+	Taz	192.867	220.275	268.361	659.336	706.452	750.63	4.2193	4.84533	5.71595	13.3733	14.2367	15.0733	466.32	-1.63812	3.43612e-16	2.15161e-14	DOWN	tafazzin [Source:MGI Symbol;Acc:MGI:109626]	[GO:0016746:transferase activity, transferring acyl groups][GO:0006644:phospholipid metabolic process][GO:0016020:membrane][GO:0016021:integral component of membrane][GO:0005739:mitochondrion][GO:0030097:hemopoiesis][GO:0007507:heart development][GO:0048738:cardiac muscle tissue development][GO:0032981:mitochondrial respiratory chain complex I assembly][GO:0006936:muscle contraction][GO:0060048:c…	[mmu00564:Glycerophospholipid metabolism]	-
ENSMUSG00000027375	2	127633226	127656695	3264	-	Mal	2.61811	4.39086	1.16174	82.9807	122.352	105.956	0.0596053	0.100513	0.0257509	1.75156	2.56598	2.21424	53.2433	-5.16187	3.71094e-16	2.31663e-14	DOWN	myelin and lymphocyte protein, T cell differentiation protein [Source:MGI Symbol;Acc:MGI:892970]	[GO:0016020:membrane][GO:0016021:integral component of membrane][GO:0000139:Golgi membrane][GO:0005794:Golgi apparatus][GO:0005886:plasma membrane][GO:0016324:apical plasma membrane][GO:0005783:endoplasmic reticulum][GO:0016021:integral component of membrane][GO:0045121:membrane raft][GO:0045121:membrane raft][GO:0016324:apical plasma membrane][GO:0019898:extrinsic component of membrane][GO:00425…	-	-
ENSMUSG00000086454	2	104559163	104571429	3606	+	Platr14	1000.12	1083.08	1274.43	2635.54	2563.02	2766.35	82.1467	89.4492	101.916	200.706	193.925	208.568	1887.09	-1.24722	4.08562e-16	2.54666e-14	DOWN	pluripotency associated transcript 14 [Source:MGI Symbol;Acc:MGI:1922209]	-	-	-
ENSMUSG00000025036	19	46573365	46598066	11346	+	Sfxn2	76.7978	124.408	147.541	494.276	458.555	538.717	0.924637	1.50608	1.7295	5.51751	5.08579	5.95367	306.716	-2.10147	4.13333e-16	2.5725e-14	DOWN	sideroflexin 2 [Source:MGI Symbol;Acc:MGI:2137678]	[GO:0016020:membrane][GO:0006811:ion transport][GO:0055085:transmembrane transport][GO:0015075:ion transmembrane transporter activity][GO:0016021:integral component of membrane][GO:0003674:molecular_function][GO:0034220:ion transmembrane transport][GO:0005739:mitochondrion][GO:0005739:mitochondrion][GO:0005739:mitochondrion][GO:0005739:mitochondrion][GO:0005743:mitochondrial inner membrane][GO:00…	-	-
ENSMUSG00000055884	12	65075603	65132058	23876	+	Fancm	431.115	458.113	262.553	1617.22	1112.87	1418.28	3.4885	3.72731	2.06847	12.1329	8.29537	10.5344	883.36	-1.84502	4.54258e-16	2.82293e-14	DOWN	Fanconi anemia, complementation group M [Source:MGI Symbol;Acc:MGI:2442306]	[GO:0003677:DNA binding][GO:0005524:ATP binding][GO:0016787:hydrolase activity][GO:0004518:nuclease activity][GO:0005634:nucleus][GO:0005654:nucleoplasm][GO:0090305:nucleic acid phosphodiester bond hydrolysis][GO:0000166:nucleotide binding][GO:0003682:chromatin binding][GO:0006281:DNA repair][GO:0006974:cellular response to DNA damage stimulus][GO:0004386:helicase activity][GO:0043240:Fanconi ana…	-	-
ENSMUSG00000046337	1	36562692	36683183	8211	-	Fam178b	424.133	389.323	377.565	967.807	1074.57	1005.95	11.7343	10.8303	10.1703	24.8252	27.3863	25.5464	706.558	-1.35504	4.65766e-16	2.89007e-14	DOWN	family with sequence similarity 178, member B [Source:MGI Symbol;Acc:MGI:3026913]	-	-	-
ENSMUSG00000029622	5	145114215	145130705	10578	+	Arpc1b	2413.02	2444.98	2893.89	5534.45	6296.36	5632.28	49.1507	50.0749	57.3901	104.519	118.141	105.306	4202.5	-1.1722	4.79344e-16	2.96537e-14	DOWN	actin related protein 2/3 complex, subunit 1B [Source:MGI Symbol;Acc:MGI:1343142]	[GO:0005515:protein binding][GO:0015629:actin cytoskeleton][GO:0030833:regulation of actin filament polymerization][GO:0034314:Arp2/3 complex-mediated actin nucleation][GO:0005885:Arp2/3 protein complex][GO:0005634:nucleus][GO:0005737:cytoplasm][GO:0005856:cytoskeleton][GO:0003779:actin binding][GO:0044877:protein-containing complex binding][GO:0051015:actin filament binding][GO:0051015:actin fil…	-	-
ENSMUSG00000028078	3	86786151	86920852	26363	-	Dclk2	726.961	643.261	518.135	1681.26	1584.2	1700.41	5.71712	5.08663	3.9673	12.2589	11.4768	12.2749	1142.37	-1.39299	5.73795e-16	3.52841e-14	DOWN	doublecortin-like kinase 2 [Source:MGI Symbol;Acc:MGI:1918012]	[GO:0005524:ATP binding][GO:0006468:protein phosphorylation][GO:0035556:intracellular signal transduction][GO:0004672:protein kinase activity][GO:0016740:transferase activity][GO:0005737:cytoplasm][GO:0000166:nucleotide binding][GO:0005856:cytoskeleton][GO:0016301:kinase activity][GO:0016310:phosphorylation][GO:0004674:protein serine/threonine kinase activity][GO:0000226:microtubule cytoskeleton …	-	-
ENSMUSG00000043929	X	94234599	94277724	19560	+	Klhl15	122.178	100.99	84.8069	419.413	355.354	426.378	1.23814	1.02904	0.836746	3.94066	3.31727	3.96617	251.52	-1.95866	6.90115e-16	4.21843e-14	DOWN	kelch-like 15 [Source:MGI Symbol;Acc:MGI:1923400]	[GO:0005515:protein binding][GO:0016567:protein ubiquitination][GO:0031463:Cul3-RING ubiquitin ligase complex][GO:0005634:nucleus][GO:0005634:nucleus][GO:0005634:nucleus][GO:0006511:ubiquitin-dependent protein catabolic process][GO:0031463:Cul3-RING ubiquitin ligase complex][GO:0006511:ubiquitin-dependent protein catabolic process][GO:0071630:nuclear protein quality control by the ubiquitin-prote…	-	-
ENSMUSG00000042035	3	101377083	101463059	13102	+	Igsf3	442.46	553.249	315.993	1457.57	1310.77	1401.69	3.79645	4.7731	2.63978	11.5954	10.3603	11.0396	913.621	-1.6646	7.1204e-16	4.34598e-14	DOWN	immunoglobulin superfamily, member 3 [Source:MGI Symbol;Acc:MGI:1926158]	[GO:0016020:membrane][GO:0016021:integral component of membrane][GO:0003674:molecular_function][GO:0016021:integral component of membrane][GO:0032808:lacrimal gland development][GO:0032808:lacrimal gland development][GO:0016020:membrane][GO:0016021:integral component of membrane]	-	-
ENSMUSG00000026409	1	130689182	130729253	31970	-	Pfkfb2	77.6705	76.8401	60.4104	286.825	307.477	315.316	1.09041	1.08468	0.825721	3.73338	3.97641	4.06332	187.423	-2.07395	7.51442e-16	4.57289e-14	DOWN	6-phosphofructo-2-kinase/fructose-2,6-biphosphatase 2 [Source:MGI Symbol;Acc:MGI:107815]	[GO:0005524:ATP binding][GO:0003824:catalytic activity][GO:0006003:fructose 2,6-bisphosphate metabolic process][GO:0003873:6-phosphofructo-2-kinase activity][GO:0006000:fructose metabolic process][GO:0016740:transferase activity][GO:0016301:kinase activity][GO:0016310:phosphorylation][GO:0046835:carbohydrate phosphorylation][GO:0005524:ATP binding][GO:0003824:catalytic activity][GO:0016301:kinase…	[mmu00051:Fructose and mannose metabolism][mmu04066:HIF-1 signaling pathway]	-
ENSMUSG00000031402	X	75109733	75131016	10892	-	Mpp1	537.585	571.544	649.412	1398.04	1407.58	1427.22	11.934	12.7575	14.036	28.7746	28.7843	29.0823	998.564	-1.26869	1.19449e-15	7.20502e-14	DOWN	membrane protein, palmitoylated [Source:MGI Symbol;Acc:MGI:105941]	[GO:0005515:protein binding][GO:0016020:membrane][GO:0005886:plasma membrane][GO:0005829:cytosol][GO:0042995:cell projection][GO:0016020:membrane][GO:0005515:protein binding][GO:0016607:nuclear speck][GO:0032420:stereocilium][GO:0030863:cortical cytoskeleton][GO:0090022:regulation of neutrophil chemotaxis][GO:0005829:cytosol][GO:0016607:nuclear speck][GO:0005515:protein binding][GO:0005515:protei…	-	-
ENSMUSG00000076435	11	94557102	94601871	5015	-	Acsf2	1048.99	832.8	741.189	2186.36	2200.21	2309.34	21.0348	16.7914	14.4705	40.6482	40.6422	42.5066	1553.15	-1.35099	1.21309e-15	7.30646e-14	DOWN	acyl-CoA synthetase family member 2 [Source:MGI Symbol;Acc:MGI:2388287]	[GO:0003824:catalytic activity][GO:0003674:molecular_function][GO:0008150:biological_process][GO:0000166:nucleotide binding][GO:0005524:ATP binding][GO:0006629:lipid metabolic process][GO:0005739:mitochondrion][GO:0016874:ligase activity][GO:0005739:mitochondrion][GO:0006631:fatty acid metabolic process]	-	-
ENSMUSG00000020709	11	80154105	80178958	2386	+	Adap2	36.6535	26.3452	23.2348	230.001	185.124	167.232	1.29869	0.938576	0.801524	7.55565	6.04226	5.43892	111.432	-2.75105	1.32259e-15	7.94268e-14	DOWN	ArfGAP with dual PH domains 2 [Source:MGI Symbol;Acc:MGI:2663075]	[GO:0005096:GTPase activator activity][GO:0043547:positive regulation of GTPase activity][GO:1902936:phosphatidylinositol bisphosphate binding][GO:0016020:membrane][GO:0046872:metal ion binding][GO:0005886:plasma membrane][GO:0005886:plasma membrane][GO:0005737:cytoplasm][GO:0005737:cytoplasm][GO:0005737:cytoplasm][GO:0005886:plasma membrane][GO:0005886:plasma membrane][GO:0016020:membrane][GO:00…	-	-
ENSMUSG00000020741	11	74649495	74670847	17478	+	Cluh	1074.3	1074.3	749.321	2617.5	2459.81	2495.72	11.1421	11.2032	7.56654	25.1698	23.5011	23.7596	1745.16	-1.38412	1.70282e-15	1.01963e-13	DOWN	clustered mitochondria (cluA/CLU1) homolog [Source:MGI Symbol;Acc:MGI:1921398]	[GO:0005515:protein binding][GO:0048312:intracellular distribution of mitochondria][GO:0003723:RNA binding][GO:0005737:cytoplasm][GO:0003729:mRNA binding][GO:0007005:mitochondrion organization][GO:0005515:protein binding][GO:0048312:intracellular distribution of mitochondria][GO:0003723:RNA binding][GO:0005737:cytoplasm][GO:0007005:mitochondrion organization]	-	-
ENSMUSG00000014932	5	32611171	32687057	13654	+	Yes1	481.732	632.284	422.873	1619.93	1329.92	1456.58	6.64356	8.76769	5.67796	20.713	16.8952	18.4387	990.552	-1.51691	1.79013e-15	1.07035e-13	DOWN	YES proto-oncogene 1, Src family tyrosine kinase [Source:MGI Symbol;Acc:MGI:99147]	[GO:0005524:ATP binding][GO:0005515:protein binding][GO:0006468:protein phosphorylation][GO:0004672:protein kinase activity][GO:0004713:protein tyrosine kinase activity][GO:0016020:membrane][GO:0016740:transferase activity][GO:0005886:plasma membrane][GO:0005794:Golgi apparatus][GO:0005829:cytosol][GO:0005515:protein binding][GO:0005737:cytoplasm][GO:0000166:nucleotide binding][GO:0005886:plasma …	[mmu04520:Adherens junction][mmu04530:Tight junction]	-
ENSMUSG00000047412	9	31030644	31075885	18470	+	Zbtb44	1080.41	1101.37	692.396	2938.6	2533.23	2754.86	7.71141	7.90422	4.81159	19.4464	16.6558	18.0488	1850.14	-1.51532	1.794e-15	1.0711e-13	DOWN	zinc finger and BTB domain containing 44 [Source:MGI Symbol;Acc:MGI:1925123]	[GO:0005515:protein binding][GO:0003676:nucleic acid binding][GO:0046872:metal ion binding][GO:0008150:biological_process][GO:0003677:DNA binding][GO:0005634:nucleus][GO:0005515:protein binding][GO:0003676:nucleic acid binding][GO:0046872:metal ion binding][GO:0008150:biological_process][GO:0003677:DNA binding][GO:0005634:nucleus][GO:0005515:protein binding][GO:0003676:nucleic acid binding][GO:00…	-	ZBTB
ENSMUSG00000031217	X	99136130	99148991	4065	+	Efnb1	128.287	133.921	144.056	419.413	430.893	467.229	2.49036	2.614	2.72267	7.54869	7.70535	8.32548	287.3	-1.69857	2.04578e-15	1.21437e-13	DOWN	ephrin B1 [Source:MGI Symbol;Acc:MGI:102708]	[GO:0016020:membrane][GO:0046875:ephrin receptor binding][GO:0048013:ephrin receptor signaling pathway][GO:0016021:integral component of membrane][GO:0005886:plasma membrane][GO:0005634:nucleus][GO:0005634:nucleus][GO:0005515:protein binding][GO:0005737:cytoplasm][GO:0005886:plasma membrane][GO:0007275:multicellular organism development][GO:0005886:plasma membrane][GO:0030154:cell differentiation…	-	-
ENSMUSG00000080069	X	86344823	86345845	1023	-	Gm41	11.3451	23.4179	25.5582	154.236	156.398	202.976	0.701397	1.45573	1.53841	8.84078	8.90697	11.5186	95.6553	-3.09701	2.13415e-15	1.26318e-13	DOWN	predicted pseudogene 41 [Source:MGI Symbol;Acc:MGI:2684887]	-	-	-
ENSMUSG00000038765	2	33560965	33640511	6686	-	Lmx1b	225.157	155.144	87.1304	778.395	691.557	685.524	2.9729	2.05971	1.12008	9.52895	8.41136	8.30841	437.151	-2.19887	2.23494e-15	1.31903e-13	DOWN	LIM homeobox transcription factor 1 beta [Source:MGI Symbol;Acc:MGI:1100513]	[GO:0003677:DNA binding][GO:0006355:regulation of transcription, DNA-templated][GO:0043565:sequence-specific DNA binding][GO:0046872:metal ion binding][GO:0005634:nucleus][GO:0003700:DNA-binding transcription factor activity][GO:0003677:DNA binding][GO:0006355:regulation of transcription, DNA-templated][GO:0043565:sequence-specific DNA binding][GO:0046872:metal ion binding][GO:0005634:nucleus]	-	Homeobox
ENSMUSG00000042401	19	42268287	42431785	5177	-	Crtac1	38.3989	18.2953	27.8817	175.883	194.7	231.061	0.927639	0.444402	0.655792	3.93944	4.33281	5.12375	114.37	-2.83718	2.26621e-15	1.33557e-13	DOWN	cartilage acidic protein 1 [Source:MGI Symbol;Acc:MGI:1920082]	[GO:0005509:calcium ion binding][GO:0005509:calcium ion binding][GO:0005515:protein binding][GO:0005576:extracellular region][GO:0030426:growth cone][GO:1900121:negative regulation of receptor binding][GO:0021772:olfactory bulb development][GO:0007413:axonal fasciculation]	-	-
ENSMUSG00000022750	16	17759618	17793382	10266	+	Klhl22	2240.23	1857.33	2052.79	4331.23	4597.26	4377.4	43.3816	36.1644	38.703	77.7635	82.0081	77.8091	3242.71	-1.11354	2.2941e-15	1.35007e-13	DOWN	kelch-like 22 [Source:MGI Symbol;Acc:MGI:1337995]	[GO:0005515:protein binding][GO:0016567:protein ubiquitination][GO:0051301:cell division][GO:0031463:Cul3-RING ubiquitin ligase complex][GO:0006513:protein monoubiquitination][GO:0005515:protein binding][GO:0016567:protein ubiquitination][GO:0051301:cell division][GO:0031463:Cul3-RING ubiquitin ligase complex][GO:0005634:nucleus][GO:0005634:nucleus][GO:0005634:nucleus][GO:0005829:cytosol][GO:0005…	-	-
ENSMUSG00000089876	11	69803603	69805624	1933	-	Tmem102	79.4159	94.4035	68.5425	293.138	367.057	339.571	2.5984	3.10573	2.18346	8.89245	11.0631	10.1983	207.021	-2.036	2.39145e-15	1.40133e-13	DOWN	transmembrane protein 102 [Source:MGI Symbol;Acc:MGI:1921591]	[GO:0042981:regulation of apoptotic process][GO:0016020:membrane][GO:0016021:integral component of membrane][GO:0003674:molecular_function][GO:0005886:plasma membrane][GO:0032991:protein-containing complex][GO:0009986:cell surface][GO:0005739:mitochondrion][GO:0006915:apoptotic process][GO:0007165:signal transduction][GO:0034097:response to cytokine][GO:0045785:positive regulation of cell adhesio…	-	-
ENSMUSG00000030232	6	140622663	140678472	20369	+	Aebp2	1194.73	1192.85	931.714	2976.48	2577.91	2540.4	12.7379	12.7877	9.67159	29.4227	25.3187	24.8617	1902.35	-1.28512	2.56439e-15	1.49778e-13	DOWN	AE binding protein 2 [Source:MGI Symbol;Acc:MGI:1338038]	[GO:0003676:nucleic acid binding][GO:0046872:metal ion binding][GO:0003677:DNA binding][GO:0005634:nucleus][GO:0005634:nucleus][GO:0005634:nucleus][GO:0003677:DNA binding][GO:0006325:chromatin organization][GO:0006355:regulation of transcription, DNA-templated][GO:0003714:transcription corepressor activity][GO:0003714:transcription corepressor activity][GO:0000978:RNA polymerase II proximal promo…	-	zf-C2H2
ENSMUSG00000042388	4	127169204	127237022	11430	+	Dlgap3	179.777	187.343	207.951	546.59	587.291	550.207	2.70266	2.83187	3.04372	7.61851	8.13308	7.59249	376.527	-1.55248	2.56698e-15	1.49778e-13	DOWN	DLG associated protein 3 [Source:MGI Symbol;Acc:MGI:3039563]	[GO:0023052:signaling][GO:0016020:membrane][GO:0005886:plasma membrane][GO:0030054:cell junction][GO:0045202:synapse][GO:0045211:postsynaptic membrane][GO:0005886:plasma membrane][GO:0098978:glutamatergic synapse][GO:0098978:glutamatergic synapse][GO:0045202:synapse][GO:0019904:protein domain specific binding][GO:0030165:PDZ domain binding][GO:0065003:protein-containing complex assembly][GO:00430…	-	-
ENSMUSG00000050234	4	127311421	127314039	1685	-	Gja4	13.0905	15.368	6.97043	151.53	142.567	107.233	0.491346	0.579996	0.254728	5.27326	4.92939	3.69453	72.7932	-3.4688	2.91133e-15	1.69389e-13	DOWN	gap junction protein, alpha 4 [Source:MGI Symbol;Acc:MGI:95715]	[GO:0007154:cell communication][GO:0005922:connexin complex][GO:0016020:membrane][GO:0016021:integral component of membrane][GO:0005886:plasma membrane][GO:0030054:cell junction][GO:0001568:blood vessel development][GO:0006816:calcium ion transport][GO:0007267:cell-cell signaling][GO:0005921:gap junction][GO:0005921:gap junction][GO:0005922:connexin complex][GO:0003158:endothelium development][GO…	-	-
ENSMUSG00000027536	3	10366907	10428856	10351	+	Chmp4c	474.75	417.132	377.565	1157.22	1051.17	1050.63	4.85227	4.28677	3.75714	10.9659	9.89681	9.85664	754.743	-1.35914	3.20595e-15	1.85742e-13	DOWN	charged multivesicular body protein 4C [Source:MGI Symbol;Acc:MGI:1913621]	[GO:0007034:vacuolar transport][GO:0016020:membrane][GO:0015031:protein transport][GO:0005737:cytoplasm][GO:0042803:protein homodimerization activity][GO:0005768:endosome][GO:0005829:cytosol][GO:0031902:late endosome membrane][GO:0030496:midbody][GO:0090543:Flemming body][GO:0010824:regulation of centrosome duplication][GO:0007080:mitotic metaphase plate congression][GO:1901673:regulation of mito…	-	-
ENSMUSG00000022018	14	79288756	79301645	918	-	Rgcc	23.563	18.2953	26.72	132.589	194.7	178.721	1.62337	1.26737	1.7923	8.46924	12.3565	11.3022	95.7647	-2.89577	3.80541e-15	2.18013e-13	DOWN	regulator of cell cycle [Source:MGI Symbol;Acc:MGI:1913464]	[GO:0051726:regulation of cell cycle][GO:0005634:nucleus][GO:0005634:nucleus][GO:0005515:protein binding][GO:0005737:cytoplasm][GO:0005737:cytoplasm][GO:0045944:positive regulation of transcription by RNA polymerase II][GO:0005856:cytoskeleton][GO:0005737:cytoplasm][GO:0010628:positive regulation of gene expression][GO:0005730:nucleolus][GO:0000082:G1/S transition of mitotic cell cycle][GO:000704…	-	-
ENSMUSG00000040434	2	92365046	92374869	29559	-	Large2	774.96	734.006	855.039	1744.4	2040.62	1762.96	9.74602	9.28164	10.4694	20.3397	23.6404	20.3513	1318.66	-1.2319	3.94135e-15	2.25486e-13	DOWN	LARGE xylosyl- and glucuronyltransferase 2 [Source:MGI Symbol;Acc:MGI:2443769]	[GO:0016757:transferase activity, transferring glycosyl groups][GO:0016740:transferase activity][GO:0035269:protein O-linked mannosylation][GO:0016757:transferase activity, transferring glycosyl groups][GO:0016020:membrane][GO:0016021:integral component of membrane][GO:0016740:transferase activity][GO:0000139:Golgi membrane][GO:0005794:Golgi apparatus][GO:0046872:metal ion binding][GO:0003824:cat…	-	-
ENSMUSG00000058325	7	134670654	135173639	19877	+	Dock1	1052.48	832.068	548.34	2699.58	2443.86	2496.99	9.77885	7.77338	4.96034	23.2552	20.9167	21.2957	1678.89	-1.64929	4.02753e-15	2.29776e-13	DOWN	dedicator of cytokinesis 1 [Source:MGI Symbol;Acc:MGI:2429765]	[GO:0005515:protein binding][GO:0005096:GTPase activator activity][GO:0005085:guanyl-nucleotide exchange factor activity][GO:0007010:cytoskeleton organization][GO:0007264:small GTPase mediated signal transduction][GO:0016477:cell migration][GO:0043547:positive regulation of GTPase activity][GO:0005515:protein binding][GO:0005096:GTPase activator activity][GO:0005085:guanyl-nucleotide exchange fac…	-	-
ENSMUSG00000023830	17	12682406	12769664	9935	-	Igf2r	2727.19	2433.27	1186.13	8716.58	7023.03	7443.75	19.4085	17.4117	8.21855	57.5137	46.0408	48.6259	4921.66	-1.86826	4.55178e-15	2.58251e-13	DOWN	insulin-like growth factor 2 receptor [Source:MGI Symbol;Acc:MGI:96435]	[GO:0038023:signaling receptor activity][GO:0051219:phosphoprotein binding][GO:0007041:lysosomal transport][GO:0016020:membrane][GO:0016021:integral component of membrane][GO:0005615:extracellular space][GO:0005634:nucleus][GO:0005794:Golgi apparatus][GO:0048471:perinuclear region of cytoplasm][GO:0009986:cell surface][GO:0005515:protein binding][GO:0042802:identical protein binding][GO:0005886:p…	-	-
ENSMUSG00000033209	5	110879803	111289780	24514	+	Ttc28	169.304	133.189	154.511	638.59	436.213	519.569	0.993297	0.785702	0.882587	3.47364	2.35751	2.79805	341.896	-1.8054	4.76926e-15	2.70216e-13	DOWN	tetratricopeptide repeat domain 28 [Source:MGI Symbol;Acc:MGI:2140873]	[GO:0005515:protein binding][GO:0005737:cytoplasm][GO:0005856:cytoskeleton][GO:0007049:cell cycle][GO:0051301:cell division][GO:0005813:centrosome][GO:0019900:kinase binding][GO:0005815:microtubule organizing center][GO:0005819:spindle][GO:0030496:midbody][GO:0030496:midbody][GO:0000922:spindle pole][GO:0072686:mitotic spindle][GO:0097431:mitotic spindle pole][GO:0072686:mitotic spindle][GO:19900…	-	-
ENSMUSG00000071770	X	37557412	37562283	2803	+	Rhox4e	5.23621	2.92724	5.80869	94.7062	93.6262	97.0202	0.181461	0.102001	0.195989	3.04296	2.98888	3.08624	49.8875	-4.39291	5.37304e-15	3.04006e-13	DOWN	reproductive homeobox 4E [Source:MGI Symbol;Acc:MGI:3613390]	[GO:0003677:DNA binding][GO:0008150:biological_process][GO:0005575:cellular_component][GO:0005634:nucleus]	-	Homeobox
ENSMUSG00000052157	X	155304199	155305749	1551	-	Gm650	1.7454	4.39086	0	104.628	69.1557	141.701	0.0711728	0.18003	0	3.95563	2.59771	5.30384	53.6034	-5.52508	5.45227e-15	3.08065e-13	DOWN	predicted pseudogene 650 [Source:MGI Symbol;Acc:MGI:2685496]	-	-	-
ENSMUSG00000032280	9	61372366	61418497	53199	+	Tle3	2351.06	2041.02	1858.78	4719.08	4525.97	4494.84	17.2139	15.0259	13.2505	32.035	30.5262	30.2087	3331.79	-1.13588	5.47024e-15	3.08655e-13	DOWN	transducin-like enhancer of split 3 [Source:MGI Symbol;Acc:MGI:104634]	[GO:0006355:regulation of transcription, DNA-templated][GO:0005634:nucleus][GO:0005515:protein binding][GO:0006355:regulation of transcription, DNA-templated][GO:0005634:nucleus][GO:0005515:protein binding][GO:0006355:regulation of transcription, DNA-templated][GO:0005634:nucleus][GO:0005515:protein binding][GO:0006355:regulation of transcription, DNA-templated][GO:0005634:nucleus][GO:0005515:pro…	-	-
ENSMUSG00000058022	13	41763148	41847684	8212	-	Adtrp	13.0905	15.368	10.4556	113.647	120.225	155.743	0.339311	0.40053	0.263862	2.73118	2.87063	3.70552	71.4215	-3.30318	6.26327e-15	3.52433e-13	DOWN	androgen dependent TFPI regulating protein [Source:MGI Symbol;Acc:MGI:1924596]	[GO:0016021:integral component of membrane][GO:0016020:membrane][GO:0016787:hydrolase activity][GO:0001934:positive regulation of protein phosphorylation][GO:0002042:cell migration involved in sprouting angiogenesis][GO:0002686:negative regulation of leukocyte migration][GO:0003332:negative regulation of extracellular matrix constituent secretion][GO:0010628:positive regulation of gene expression…	-	-
ENSMUSG00000054256	5	115429599	115455698	10909	+	Msi1	591.692	659.361	575.06	1358.36	1443.76	1436.15	11.9444	13.3835	11.3024	25.4234	26.8478	26.6116	1010.73	-1.21328	6.36384e-15	3.57603e-13	DOWN	musashi RNA-binding protein 1 [Source:MGI Symbol;Acc:MGI:107376]	[GO:0003723:RNA binding][GO:0003676:nucleic acid binding][GO:0005634:nucleus][GO:0005634:nucleus][GO:0005737:cytoplasm][GO:0005737:cytoplasm][GO:0003723:RNA binding][GO:1990904:ribonucleoprotein complex][GO:0005737:cytoplasm][GO:0009725:response to hormone][GO:0042802:identical protein binding][GO:0005829:cytosol][GO:0008266:poly(U) RNA binding][GO:0005844:polysome][GO:0003727:single-stranded RNA…	-	-
ENSMUSG00000053931	3	121426497	121458207	8531	+	Cnn3	5906.45	6269.42	6003.86	11348.5	13144.9	12327.9	168.725	180.076	166.982	300.567	345.902	323.254	9166.85	-1.01812	6.7518e-15	3.78885e-13	DOWN	calponin 3, acidic [Source:MGI Symbol;Acc:MGI:1919244]	[GO:0005515:protein binding][GO:0003779:actin binding][GO:0031032:actomyosin structure organization][GO:0005829:cytosol][GO:0005515:protein binding][GO:0014069:postsynaptic density][GO:0005516:calmodulin binding][GO:0030425:dendrite][GO:0015629:actin cytoskeleton][GO:0043025:neuronal cell body][GO:0043197:dendritic spine][GO:0008017:microtubule binding][GO:0032780:negative regulation of ATPase ac…	-	-
ENSMUSG00000026657	2	4017717	4614043	49708	+	Frmd4a	170.177	133.921	113.85	525.845	484.09	441.697	1.59191	1.25964	1.03691	4.56066	4.17147	3.79267	311.597	-1.79332	7.35917e-15	4.11843e-13	DOWN	FERM domain containing 4A [Source:MGI Symbol;Acc:MGI:1919850]	[GO:0005856:cytoskeleton][GO:0005856:cytoskeleton][GO:0005737:cytoplasm][GO:0005737:cytoplasm][GO:0030054:cell junction][GO:0030674:protein binding, bridging][GO:0005923:bicellular tight junction][GO:0005923:bicellular tight junction][GO:0090162:establishment of epithelial cell polarity][GO:0005912:adherens junction][GO:0050714:positive regulation of protein secretion][GO:0050709:negative regulat…	-	-
ENSMUSG00000021756	13	112464070	112510086	28459	+	Il6st	1010.59	963.794	719.116	2447.03	2194.9	2158.7	7.36521	7.06271	5.10265	16.5348	14.7356	14.4412	1582.35	-1.33475	8.18758e-15	4.56338e-13	DOWN	interleukin 6 signal transducer [Source:MGI Symbol;Acc:MGI:96560]	[GO:0005515:protein binding][GO:0016020:membrane][GO:0004896:cytokine receptor activity][GO:0016021:integral component of membrane][GO:0009897:external side of plasma membrane][GO:0005615:extracellular space][GO:0009897:external side of plasma membrane][GO:0005886:plasma membrane][GO:0005515:protein binding][GO:0042802:identical protein binding][GO:0005977:glycogen metabolic process][GO:0008284:p…	-	-
ENSMUSG00000026959	2	25291181	25319187	41064	-	Grin1	109.96	127.335	130.115	465.413	389.4	388.081	1.62641	1.89372	1.87372	6.38237	5.30557	5.26884	268.384	-1.7605	8.52335e-15	4.73767e-13	DOWN	glutamate receptor, ionotropic, NMDA1 (zeta 1) [Source:MGI Symbol;Acc:MGI:95819]	[GO:0016020:membrane][GO:0006811:ion transport][GO:0038023:signaling receptor activity][GO:0004970:ionotropic glutamate receptor activity][GO:0005216:ion channel activity][GO:0016021:integral component of membrane][GO:0005886:plasma membrane][GO:0030054:cell junction][GO:0045202:synapse][GO:0045211:postsynaptic membrane][GO:0034220:ion transmembrane transport][GO:0035235:ionotropic glutamate rece…	-	-
ENSMUSG00000040713	1	165763746	165775308	4905	+	Creg1	404.934	469.09	590.163	1224.87	1407.58	1312.33	11.0532	12.8747	15.6842	30.9987	35.3934	32.8811	901.494	-1.43224	9.57101e-15	5.2985e-13	DOWN	cellular repressor of E1A-stimulated genes 1 [Source:MGI Symbol;Acc:MGI:1344382]	[GO:0048037:cofactor binding][GO:0005615:extracellular space][GO:0005615:extracellular space][GO:0005576:extracellular region][GO:0008134:transcription factor binding][GO:0006355:regulation of transcription, DNA-templated][GO:0005667:transcription factor complex][GO:0040008:regulation of growth][GO:0005615:extracellular space][GO:0048037:cofactor binding][GO:0048037:cofactor binding]	-	-
ENSMUSG00000032198	9	21799860	21852635	25154	-	Dock6	3060.57	2655.01	2240.99	6725.95	5766.52	6038.23	28.1348	24.5405	20.0571	57.3252	48.8314	50.9509	4414.54	-1.21933	1.01487e-14	5.59565e-13	DOWN	dedicator of cytokinesis 6 [Source:MGI Symbol;Acc:MGI:1914789]	[GO:0005085:guanyl-nucleotide exchange factor activity][GO:0007264:small GTPase mediated signal transduction][GO:0005829:cytosol][GO:0005085:guanyl-nucleotide exchange factor activity][GO:0007264:small GTPase mediated signal transduction][GO:0005085:guanyl-nucleotide exchange factor activity][GO:0007264:small GTPase mediated signal transduction][GO:0003674:molecular_function][GO:0008150:biologica…	-	-
ENSMUSG00000029512	5	110784488	110810097	14271	-	Ulk1	2531.71	2341.06	1664.77	5859.16	5170.72	5436.96	30.7154	28.5583	19.6645	65.9065	57.7879	60.5479	3834.06	-1.332	1.59985e-14	8.75061e-13	DOWN	unc-51 like kinase 1 [Source:MGI Symbol;Acc:MGI:1270126]	[GO:0005524:ATP binding][GO:0007165:signal transduction][GO:0006468:protein phosphorylation][GO:0004674:protein serine/threonine kinase activity][GO:0004672:protein kinase activity][GO:0007409:axonogenesis][GO:0016740:transferase activity][GO:0006914:autophagy][GO:0000166:nucleotide binding][GO:0048675:axon extension][GO:0016301:kinase activity][GO:0016310:phosphorylation][GO:0042594:response to …	[mmu04140:Autophagy - animal][mmu04150:mTOR signaling pathway]	-
ENSMUSG00000036820	17	24155833	24163766	10175	-	Amdhd2	551.548	556.176	684.264	1380.91	1710.81	1422.11	21.1284	21.4226	25.5207	49.0454	60.3709	50.0055	1050.97	-1.33463	1.62165e-14	8.85807e-13	DOWN	amidohydrolase domain containing 2 [Source:MGI Symbol;Acc:MGI:2443978]	[GO:0016787:hydrolase activity][GO:0008448:N-acetylglucosamine-6-phosphate deacetylase activity][GO:0006044:N-acetylglucosamine metabolic process][GO:0016810:hydrolase activity, acting on carbon-nitrogen (but not peptide) bonds][GO:0016787:hydrolase activity][GO:0008448:N-acetylglucosamine-6-phosphate deacetylase activity][GO:0006044:N-acetylglucosamine metabolic process][GO:0016810:hydrolase act…	[mmu00520:Amino sugar and nucleotide sugar metabolism]	-
ENSMUSG00000048897	7	80024814	80094173	16785	+	Zfp710	1347.45	1225.05	1257	2658.09	2602.38	2749.76	14.5155	13.2693	13.1838	26.5484	25.8246	27.1902	1973.29	-1.06463	1.66775e-14	9.09775e-13	DOWN	zinc finger protein 710 [Source:MGI Symbol;Acc:MGI:1921747]	[GO:0003676:nucleic acid binding][GO:0046872:metal ion binding][GO:0003677:DNA binding][GO:0005634:nucleus][GO:0005634:nucleus][GO:0003676:nucleic acid binding][GO:0046872:metal ion binding][GO:0003677:DNA binding][GO:0005634:nucleus][GO:0005634:nucleus][GO:0003676:nucleic acid binding][GO:0046872:metal ion binding][GO:0003677:DNA binding][GO:0005634:nucleus][GO:0005634:nucleus][GO:0003676:nuclei…	-	zf-C2H2
ENSMUSG00000020527	11	84880148	84911226	19579	+	Myo19	179.777	204.907	138.247	585.375	553.246	528.505	2.12128	2.43108	1.58821	6.40398	6.0135	5.7242	365.009	-1.66676	1.78902e-14	9.73346e-13	DOWN	myosin XIX [Source:MGI Symbol;Acc:MGI:1913446]	[GO:0005524:ATP binding][GO:0005515:protein binding][GO:0003774:motor activity][GO:0016459:myosin complex][GO:0016020:membrane][GO:0005829:cytosol][GO:0005737:cytoplasm][GO:0000166:nucleotide binding][GO:0003779:actin binding][GO:0005856:cytoskeleton][GO:0005739:mitochondrion][GO:0005739:mitochondrion][GO:0003779:actin binding][GO:0003779:actin binding][GO:0005739:mitochondrion][GO:0032465:regula…	-	-
ENSMUSG00000028199	3	154596711	154623182	15911	+	Cryz	574.238	533.49	644.765	1349.34	1359.71	1363.39	10.4482	9.76007	11.4219	22.7626	22.7897	22.7704	970.821	-1.2183	1.81624e-14	9.86848e-13	DOWN	crystallin, zeta [Source:MGI Symbol;Acc:MGI:88527]	[GO:0008270:zinc ion binding][GO:0055114:oxidation-reduction process][GO:0016491:oxidoreductase activity][GO:0005829:cytosol][GO:0005829:cytosol][GO:0003723:RNA binding][GO:0005737:cytoplasm][GO:0003730:mRNA 3'-UTR binding][GO:0005829:cytosol][GO:0051289:protein homotetramerization][GO:0042178:xenobiotic catabolic process][GO:0050661:NADP binding][GO:0003730:mRNA 3'-UTR binding][GO:0070402:NADPH …	-	-
ENSMUSG00000067369	X	134222339	134276984	14405	-	Trmt2b	184.14	203.443	169.614	510.512	545.798	565.526	2.84119	3.15626	2.548	7.30312	7.75761	8.0095	363.172	-1.53753	1.93573e-14	1.04761e-12	DOWN	TRM2 tRNA methyltransferase 2B [Source:MGI Symbol;Acc:MGI:2442530]	[GO:0016740:transferase activity][GO:0008168:methyltransferase activity][GO:0032259:methylation][GO:0006396:RNA processing][GO:0008173:RNA methyltransferase activity][GO:0001510:RNA methylation][GO:0006396:RNA processing][GO:0008173:RNA methyltransferase activity][GO:0016740:transferase activity][GO:0008150:biological_process][GO:0008168:methyltransferase activity][GO:0032259:methylation][GO:0005…	-	-
ENSMUSG00000111147	9	61032212	61059116	3468	+	Gm33699	13.9632	21.2225	15.1026	138.902	123.416	155.743	0.254646	0.389156	0.268157	2.34861	2.07332	2.60711	78.0583	-3.04052	1.98256e-14	1.07155e-12	DOWN	predicted gene, 33699 [Source:MGI Symbol;Acc:MGI:5592858]	-	-	-
ENSMUSG00000052310	3	90248172	90253612	2364	+	Slc39a1	712.998	656.434	726.086	1485.53	1585.26	1590.62	19.0753	17.6584	18.9129	36.8482	39.0685	39.0616	1126.16	-1.15405	1.98525e-14	1.07159e-12	DOWN	solute carrier family 39 (zinc transporter), member 1 [Source:MGI Symbol;Acc:MGI:1353474]	[GO:0016020:membrane][GO:0055085:transmembrane transport][GO:0046873:metal ion transmembrane transporter activity][GO:0030001:metal ion transport][GO:0016021:integral component of membrane][GO:0005886:plasma membrane][GO:0005886:plasma membrane][GO:0006811:ion transport][GO:0005886:plasma membrane][GO:0005886:plasma membrane][GO:0001701:in utero embryonic development][GO:0001701:in utero embryoni…	-	-
ENSMUSG00000039337	11	121116215	121118677	2046	-	Tex19.2	82.9067	88.5491	91.7773	337.335	355.354	282.125	2.5628	2.75223	2.76214	9.66798	10.1188	8.00509	206.341	-1.89132	2.12421e-14	1.14209e-12	DOWN	testis expressed gene 19.2 [Source:MGI Symbol;Acc:MGI:1918206]	[GO:0005634:nucleus][GO:0003723:RNA binding][GO:0005634:nucleus][GO:0005515:protein binding][GO:0005737:cytoplasm][GO:0007283:spermatogenesis][GO:0005737:cytoplasm][GO:0007283:spermatogenesis][GO:0007283:spermatogenesis][GO:0030154:cell differentiation][GO:0051321:meiotic cell cycle][GO:0008584:male gonad development][GO:0010529:negative regulation of transposition][GO:0007140:male meiotic nuclea…	-	-
ENSMUSG00000028194	3	145758675	145894277	6684	+	Ddah1	531.476	560.567	477.474	1234.79	1170.33	1308.5	8.93025	9.47075	7.81119	19.2364	18.1147	20.1815	880.521	-1.24059	2.16183e-14	1.15778e-12	DOWN	dimethylarginine dimethylaminohydrolase 1 [Source:MGI Symbol;Acc:MGI:1916469]	[GO:0016403:dimethylargininase activity][GO:0000052:citrulline metabolic process][GO:0006527:arginine catabolic process][GO:0045429:positive regulation of nitric oxide biosynthetic process][GO:0046872:metal ion binding][GO:0016787:hydrolase activity][GO:0005739:mitochondrion][GO:0008270:zinc ion binding][GO:0008285:negative regulation of cell population proliferation][GO:0045429:positive regulati…	-	-
ENSMUSG00000027860	3	102153583	102204693	14318	-	Vangl1	520.131	578.862	520.459	1303.34	1162.88	1413.18	5.03689	5.6364	4.90708	11.7019	10.3736	12.5617	916.474	-1.25906	2.30118e-14	1.22761e-12	DOWN	VANGL planar cell polarity 1 [Source:MGI Symbol;Acc:MGI:2159344]	[GO:0016021:integral component of membrane][GO:0007275:multicellular organism development][GO:0016020:membrane][GO:0005886:plasma membrane][GO:0005515:protein binding][GO:0005886:plasma membrane][GO:0016021:integral component of membrane][GO:0016328:lateral plasma membrane][GO:0043473:pigmentation][GO:0016021:integral component of membrane][GO:0007275:multicellular organism development][GO:001602…	-	-
ENSMUSG00000020782	11	115824049	115855780	13543	+	Llgl2	2134.63	1979.55	2005.16	3952.41	4249.35	4138.68	37.377	34.8518	34.1836	64.1645	68.5407	66.5188	3076.63	-1.01186	2.75418e-14	1.4579e-12	DOWN	LLGL2 scribble cell polarity complex component [Source:MGI Symbol;Acc:MGI:1918843]	[GO:0005515:protein binding][GO:0043547:positive regulation of GTPase activity][GO:0005829:cytosol][GO:0005737:cytoplasm][GO:0005737:cytoplasm][GO:0005886:plasma membrane][GO:0043231:intracellular membrane-bounded organelle][GO:0005737:cytoplasm][GO:0005096:GTPase activator activity][GO:0007049:cell cycle][GO:0051301:cell division][GO:0009791:post-embryonic development][GO:0035264:multicellular o…	-	-
ENSMUSG00000031393	X	74026592	74135363	29858	-	Mecp2	473.877	395.909	377.565	1218.55	1019.25	1000.84	2.84405	2.38916	2.20623	6.78058	5.63502	5.51362	747.666	-1.37631	2.93196e-14	1.55001e-12	DOWN	methyl CpG binding protein 2 [Source:MGI Symbol;Acc:MGI:99918]	[GO:0003677:DNA binding][GO:0005634:nucleus][GO:0000122:negative regulation of transcription by RNA polymerase II][GO:0010385:double-stranded methylated DNA binding][GO:0051151:negative regulation of smooth muscle cell differentiation][GO:0005634:nucleus][GO:0005634:nucleus][GO:0032991:protein-containing complex][GO:0005829:cytosol][GO:0005829:cytosol][GO:0005829:cytosol][GO:0005634:nucleus][GO:0…	-	MBD
ENSMUSG00000043681	14	34351881	34355433	408	-	Fam25c	82.034	53.4222	106.88	340.942	339.395	386.804	12.7164	8.32661	16.1307	49.0006	48.464	55.0379	218.246	-2.15165	2.96236e-14	1.56407e-12	DOWN	family with sequence similarity 25, member C [Source:MGI Symbol;Acc:MGI:1916384]	[GO:0003674:molecular_function][GO:0008150:biological_process][GO:0005575:cellular_component]	-	-
ENSMUSG00000026576	1	164437109	164458355	4279	-	Atp1b1	1353.56	1462.89	1030.46	3158.68	3001.36	3028.05	33.1809	36.0577	24.594	71.7904	67.7754	68.1356	2172.5	-1.25468	3.0618e-14	1.6145e-12	DOWN	ATPase, Na+/K+ transporting, beta 1 polypeptide [Source:MGI Symbol;Acc:MGI:88108]	[GO:0006813:potassium ion transport][GO:0006814:sodium ion transport][GO:0005890:sodium:potassium-exchanging ATPase complex][GO:0016020:membrane][GO:0016021:integral component of membrane][GO:0005886:plasma membrane][GO:0005515:protein binding][GO:0006811:ion transport][GO:0005886:plasma membrane][GO:0005886:plasma membrane][GO:0016020:membrane][GO:0016324:apical plasma membrane][GO:0016324:apica…	-	-
ENSMUSG00000034854	10	81357491	81366225	4611	+	Mfsd12	109.088	154.412	59.2486	496.982	518.136	491.484	1.73743	2.47279	0.918745	7.33874	7.60182	7.18522	304.892	-2.20984	3.20456e-14	1.68761e-12	DOWN	major facilitator superfamily domain containing 12 [Source:MGI Symbol;Acc:MGI:3604804]	[GO:0016021:integral component of membrane][GO:0015293:symporter activity][GO:0008643:carbohydrate transport][GO:0016020:membrane][GO:0005887:integral component of plasma membrane][GO:0055085:transmembrane transport][GO:0071702:organic substance transport][GO:0016020:membrane][GO:0016021:integral component of membrane][GO:0055085:transmembrane transport][GO:0015293:symporter activity][GO:0008643:…	-	-
ENSMUSG00000021431	13	38204938	38227665	14908	+	Snrnp48	690.308	903.786	767.909	1821.97	1784.22	1945.51	6.52697	8.59233	7.06912	15.972	15.5403	16.8851	1318.95	-1.23184	3.47254e-14	1.82406e-12	DOWN	small nuclear ribonucleoprotein 48 (U11/U12) [Source:MGI Symbol;Acc:MGI:1915047]	[GO:0046872:metal ion binding][GO:0003674:molecular_function][GO:0008150:biological_process][GO:0005634:nucleus][GO:0005654:nucleoplasm][GO:0005654:nucleoplasm][GO:0005829:cytosol][GO:0005829:cytosol][GO:0006397:mRNA processing][GO:0008380:RNA splicing][GO:0005681:spliceosomal complex][GO:0005689:U12-type spliceosomal complex][GO:0005689:U12-type spliceosomal complex][GO:0005689:U12-type spliceos…	-	-
ENSMUSG00000034902	10	81292963	81319973	20162	+	Pip5k1c	646.672	567.885	641.279	1405.26	1348	1428.49	9.46083	8.35376	9.13437	19.0613	18.1669	19.1833	1006.27	-1.17293	4.38104e-14	2.28957e-12	DOWN	phosphatidylinositol-4-phosphate 5-kinase, type 1 gamma [Source:MGI Symbol;Acc:MGI:1298224]	[GO:0016307:phosphatidylinositol phosphate kinase activity][GO:0046488:phosphatidylinositol metabolic process][GO:0016020:membrane][GO:0016740:transferase activity][GO:0005886:plasma membrane][GO:0005654:nucleoplasm][GO:0005829:cytosol][GO:0005829:cytosol][GO:0005737:cytoplasm][GO:0030054:cell junction][GO:0000166:nucleotide binding][GO:0005524:ATP binding][GO:0042995:cell projection][GO:0016301:…	[mmu00562:Inositol phosphate metabolism][mmu04070:Phosphatidylinositol signaling system][mmu04144:Endocytosis][mmu04510:Focal adhesion][mmu04666:Fc gamma R-mediated phagocytosis][mmu04810:Regulation of actin cytoskeleton]	-
ENSMUSG00000035150	X	94188707	94212862	5479	-	Eif2s3x	2420.88	2516.7	1517.23	5617.43	5944.2	5670.58	41.9824	43.8835	25.6172	90.3198	94.958	90.2656	3947.83	-1.4157	4.41247e-14	2.30306e-12	DOWN	eukaryotic translation initiation factor 2, subunit 3, structural gene X-linked [Source:MGI Symbol;Acc:MGI:1349431]	[GO:0005525:GTP binding][GO:0003924:GTPase activity][GO:0005829:cytosol][GO:0005737:cytoplasm][GO:0000166:nucleotide binding][GO:0005737:cytoplasm][GO:0006412:translation][GO:0003743:translation initiation factor activity][GO:0003743:translation initiation factor activity][GO:0006413:translational initiation][GO:0006413:translational initiation][GO:0006413:translational initiation][GO:0003743:tra…	-	-
ENSMUSG00000045598	7	127233061	127238179	7212	+	Zfp553	869.212	724.492	670.323	1720.05	1875.72	1718.28	16.4494	13.7859	12.3508	30.1796	32.699	29.8482	1263.01	-1.23009	4.52812e-14	2.36043e-12	DOWN	zinc finger protein 553 [Source:MGI Symbol;Acc:MGI:2384725]	[GO:0003676:nucleic acid binding][GO:0046872:metal ion binding][GO:0008150:biological_process][GO:0003677:DNA binding][GO:0005634:nucleus][GO:0005634:nucleus][GO:0003677:DNA binding][GO:0003676:nucleic acid binding][GO:0046872:metal ion binding][GO:0008150:biological_process][GO:0003677:DNA binding][GO:0005634:nucleus][GO:0005634:nucleus][GO:0003677:DNA binding]	-	zf-C2H2
ENSMUSG00000071708	X	157443855	157492287	9281	-	Sms	2066.56	1954.67	2318.83	4395.27	4391.92	4266.34	35.1629	33.4416	38.4143	69.3384	68.8392	66.6336	3232.26	-1.04255	4.86439e-14	2.53251e-12	DOWN	spermine synthase [Source:MGI Symbol;Acc:MGI:109490]	[GO:0006597:spermine biosynthetic process][GO:0016768:spermine synthase activity][GO:0016740:transferase activity][GO:0006596:polyamine biosynthetic process][GO:0006597:spermine biosynthetic process][GO:0006597:spermine biosynthetic process][GO:0008215:spermine metabolic process][GO:0016768:spermine synthase activity][GO:0016768:spermine synthase activity][GO:0016740:transferase activity][GO:0006…	[mmu00270:Cysteine and methionine metabolism][mmu00330:Arginine and proline metabolism][mmu00410:beta-Alanine metabolism][mmu00480:Glutathione metabolism]	-
ENSMUSG00000034708	11	102430315	102437048	9351	+	Grn	2944.5	2611.1	3245.9	5816.77	6482.55	6303.76	79.5839	70.9601	85.4152	145.763	161.4	156.392	4567.43	-1.08016	5.09498e-14	2.6492e-12	DOWN	granulin [Source:MGI Symbol;Acc:MGI:95832]	[GO:0051087:chaperone binding][GO:0007041:lysosomal transport][GO:0007042:lysosomal lumen acidification][GO:0030335:positive regulation of cell migration][GO:0043524:negative regulation of neuron apoptotic process][GO:0050679:positive regulation of epithelial cell proliferation][GO:0050821:protein stabilization][GO:0060266:negative regulation of respiratory burst involved in inflammatory response…	-	-
ENSMUSG00000097134	10	66912489	66920258	2617	-	1110002J07Rik	75.0524	81.9628	151.026	423.021	462.811	425.102	2.12953	2.33837	4.17213	11.1284	12.0967	11.0717	269.829	-2.10225	5.60401e-14	2.91019e-12	DOWN	RIKEN cDNA 1110002J07 gene [Source:MGI Symbol;Acc:MGI:1915738]	-	-	-
ENSMUSG00000032561	9	104288251	104337748	11286	-	Acpp	27.9265	53.4222	8.13217	280.511	267.047	274.465	0.393983	0.757808	0.1117	3.66912	3.47051	3.55426	151.917	-3.16446	5.85793e-14	3.03438e-12	DOWN	acid phosphatase, prostate [Source:MGI Symbol;Acc:MGI:1928480]	[GO:0016020:membrane][GO:0016021:integral component of membrane][GO:0005615:extracellular space][GO:0005886:plasma membrane][GO:0005886:plasma membrane][GO:0016787:hydrolase activity][GO:0042802:identical protein binding][GO:0042803:protein homodimerization activity][GO:0005886:plasma membrane][GO:0005576:extracellular region][GO:0005615:extracellular space][GO:0045177:apical part of cell][GO:000…	[mmu00740:Riboflavin metabolism]	-
ENSMUSG00000066705	9	45370185	45396159	5939	+	Fxyd6	1120.55	1175.29	1582.29	2845.7	3446.08	3285.92	30.0041	31.6425	41.2498	70.6463	85.0001	80.7622	2242.64	-1.30546	6.08467e-14	3.14786e-12	DOWN	FXYD domain-containing ion transport regulator 6 [Source:MGI Symbol;Acc:MGI:1890226]	[GO:0016020:membrane][GO:0099106:ion channel regulator activity][GO:0043269:regulation of ion transport][GO:0016021:integral component of membrane][GO:0006811:ion transport][GO:0005886:plasma membrane][GO:0098978:glutamatergic synapse][GO:0098978:glutamatergic synapse][GO:0017080:sodium channel regulator activity][GO:0099056:integral component of presynaptic membrane][GO:0099056:integral componen…	-	-
ENSMUSG00000044788	11	115279622	115297663	6841	-	Fads6	101.233	132.458	106.88	368.001	372.377	412.336	1.29319	1.70134	1.32929	4.3585	4.38191	4.83492	248.881	-1.75416	6.90846e-14	3.54723e-12	DOWN	fatty acid desaturase domain family, member 6 [Source:MGI Symbol;Acc:MGI:3039592]	[GO:0006629:lipid metabolic process][GO:0016020:membrane][GO:0016021:integral component of membrane][GO:0003674:molecular_function][GO:0008150:biological_process][GO:0005575:cellular_component][GO:0016491:oxidoreductase activity][GO:0055114:oxidation-reduction process][GO:0006631:fatty acid metabolic process][GO:0006633:fatty acid biosynthetic process]	-	-
ENSMUSG00000025134	11	120592121	120598365	4886	-	Alyref	1096.99	1004.78	1247.71	2298.2	2577.91	2517.42	19.671	18.1163	21.7833	38.2088	42.583	41.4363	1790.5	-1.14336	7.70461e-14	3.94616e-12	DOWN	Aly/REF export factor [Source:MGI Symbol;Acc:MGI:1341044]	[GO:0003676:nucleic acid binding][GO:0005634:nucleus][GO:0005634:nucleus][GO:0003723:RNA binding][GO:0005737:cytoplasm][GO:0003697:single-stranded DNA binding][GO:0006397:mRNA processing][GO:0008380:RNA splicing][GO:0051028:mRNA transport][GO:0016607:nuclear speck][GO:0005681:spliceosomal complex][GO:0003723:RNA binding]	-	-
ENSMUSG00000040459	8	8665075	8690521	8251	-	Arglu1	850.885	879.636	1152.44	2379.38	2123.61	2379.55	15.1207	15.7174	19.9392	39.2028	34.7633	38.8148	1627.58	-1.25705	8.02059e-14	4.10289e-12	DOWN	arginine and glutamate rich 1 [Source:MGI Symbol;Acc:MGI:2442985]	[GO:0005654:nucleoplasm][GO:0005739:mitochondrion][GO:0005654:nucleoplasm][GO:0005739:mitochondrion]	-	-
ENSMUSG00000058328	X	73107635	73292976	5641	-	Xlr5a	83.7794	99.5262	101.071	331.021	340.459	312.763	3.21132	3.83584	3.7719	11.7639	12.0214	11.0043	211.436	-1.79286	9.68326e-14	4.91668e-12	DOWN	X-linked lymphocyte-regulated 5A [Source:MGI Symbol;Acc:MGI:3574108]	[GO:0003674:molecular_function][GO:0007283:spermatogenesis][GO:0007286:spermatid development][GO:0051321:meiotic cell cycle][GO:0000795:synaptonemal complex][GO:0003674:molecular_function][GO:0007283:spermatogenesis][GO:0007286:spermatid development][GO:0051321:meiotic cell cycle][GO:0000795:synaptonemal complex][GO:0003674:molecular_function][GO:0007283:spermatogenesis][GO:0007286:spermatid deve…	-	-
ENSMUSG00000073538	1	153404827	153414233	4686	-	E330020D12Rik	152.723	129.53	219.568	478.943	655.383	656.163	4.91805	4.19408	6.88407	14.2996	19.4414	19.3955	382.052	-1.8417	9.9944e-14	5.06215e-12	DOWN	Riken cDNA E330020D12 gene [Source:MGI Symbol;Acc:MGI:3761270]	-	-	-
ENSMUSG00000031951	8	111912011	111933881	8292	-	Tmem231	583.838	523.244	541.37	1240.2	1247.99	1199.99	12.3744	11.151	11.1715	24.371	24.3662	23.3458	889.439	-1.16208	1.07424e-13	5.43432e-12	DOWN	transmembrane protein 231 [Source:MGI Symbol;Acc:MGI:2685024]	[GO:0016020:membrane][GO:0016021:integral component of membrane][GO:0005886:plasma membrane][GO:0005515:protein binding][GO:0042995:cell projection][GO:0016020:membrane][GO:0001701:in utero embryonic development][GO:0007224:smoothened signaling pathway][GO:0005929:cilium][GO:0060170:ciliary membrane][GO:0060170:ciliary membrane][GO:0030030:cell projection organization][GO:0060271:cilium assembly]…	-	-
ENSMUSG00000056758	10	120361275	120476469	10909	-	Hmga2	201.594	199.052	112.689	589.884	576.652	617.866	3.34644	3.32238	1.82126	9.07868	8.81785	9.41455	382.956	-1.78965	1.28124e-13	6.43392e-12	DOWN	high mobility group AT-hook 2 [Source:MGI Symbol;Acc:MGI:101761]	[GO:0003677:DNA binding][GO:0006355:regulation of transcription, DNA-templated][GO:0005634:nucleus][GO:0000785:chromatin][GO:2000773:negative regulation of cellular senescence][GO:0045766:positive regulation of angiogenesis][GO:0005634:nucleus][GO:0005634:nucleus][GO:0005634:nucleus][GO:0005634:nucleus][GO:0005515:protein binding][GO:0045944:positive regulation of transcription by RNA polymerase …	-	HMGA
ENSMUSG00000060681	X	56609757	56664230	13879	+	Slc9a6	205.958	223.934	200.981	605.218	537.287	565.526	2.61775	2.86185	2.48708	7.13201	6.29071	6.59785	389.817	-1.43553	1.3832e-13	6.9282e-12	DOWN	solute carrier family 9 (sodium/hydrogen exchanger), member 6 [Source:MGI Symbol;Acc:MGI:2443511]	[GO:0016021:integral component of membrane][GO:0055085:transmembrane transport][GO:0006814:sodium ion transport][GO:0015385:sodium:proton antiporter activity][GO:0006885:regulation of pH][GO:0006812:cation transport][GO:0015299:solute:proton antiporter activity][GO:0016020:membrane][GO:0005886:plasma membrane][GO:0005886:plasma membrane][GO:0031410:cytoplasmic vesicle][GO:0005886:plasma membrane]…	-	-
ENSMUSG00000069727	7	42660105	42692742	4528	-	Zfp975	116.069	151.485	89.4538	460.904	378.76	474.888	2.33192	3.06014	1.74977	8.58531	7.00977	8.75765	278.593	-1.87133	1.42148e-13	7.10139e-12	DOWN	zinc finger protein 975 [Source:MGI Symbol;Acc:MGI:3648690]	[GO:0006355:regulation of transcription, DNA-templated][GO:0005622:intracellular][GO:0003676:nucleic acid binding][GO:0000976:transcription regulatory region sequence-specific DNA binding][GO:0046872:metal ion binding][GO:0005575:cellular_component][GO:0005634:nucleus]	-	zf-C2H2
ENSMUSG00000060548	14	60963875	61046490	11079	-	Tnfrsf19	362.171	391.519	353.168	1006.59	796.886	1002.12	5.65434	6.14606	5.36829	14.5704	11.4606	14.3611	652.076	-1.34066	1.44466e-13	7.19299e-12	DOWN	tumor necrosis factor receptor superfamily, member 19 [Source:MGI Symbol;Acc:MGI:1352474]	[GO:0005515:protein binding][GO:0016020:membrane][GO:0016021:integral component of membrane][GO:0005886:plasma membrane][GO:0005886:plasma membrane][GO:0005576:extracellular region][GO:0038023:signaling receptor activity][GO:0043123:positive regulation of I-kappaB kinase/NF-kappaB signaling][GO:0005515:protein binding][GO:0043123:positive regulation of I-kappaB kinase/NF-kappaB signaling][GO:0001…	-	-
ENSMUSG00000073139	X	70459753	70477180	5200	-	Tmem185a	301.955	362.978	331.095	840.63	774.544	877.012	7.86221	9.50297	8.39348	20.2936	18.5777	20.9608	581.369	-1.32203	1.4798e-13	7.35904e-12	DOWN	transmembrane protein 185A [Source:MGI Symbol;Acc:MGI:2448555]	[GO:0016020:membrane][GO:0016021:integral component of membrane][GO:0016020:membrane][GO:0016021:integral component of membrane][GO:0003674:molecular_function][GO:0008150:biological_process][GO:0042995:cell projection][GO:0030425:dendrite][GO:0030425:dendrite][GO:0030425:dendrite]	-	-
ENSMUSG00000025937	1	13623330	13660546	4894	-	Lactb2	2140.74	2548.16	2280.49	4803.86	4504.7	5200.79	30.1273	36.0579	31.2473	62.6813	58.3991	67.1842	3579.79	-1.0575	1.5296e-13	7.58833e-12	DOWN	lactamase, beta 2 [Source:MGI Symbol;Acc:MGI:2442551]	[GO:0046872:metal ion binding][GO:0016787:hydrolase activity][GO:0003723:RNA binding][GO:0004518:nuclease activity][GO:0005739:mitochondrion][GO:0005739:mitochondrion][GO:0008270:zinc ion binding][GO:0008270:zinc ion binding][GO:0005759:mitochondrial matrix][GO:0005759:mitochondrial matrix][GO:0004519:endonuclease activity][GO:0005759:mitochondrial matrix][GO:0004521:endoribonuclease activity][GO…	-	-
ENSMUSG00000020534	11	60788104	60811718	11981	-	Shmt1	1042.88	902.322	999.095	2060.99	2070.42	2054.02	23.0782	20.0773	21.5259	42.2857	42.2055	41.7228	1521.62	-1.07149	1.82523e-13	9.01142e-12	DOWN	serine hydroxymethyltransferase 1 (soluble) [Source:MGI Symbol;Acc:MGI:98299]	[GO:0003824:catalytic activity][GO:0030170:pyridoxal phosphate binding][GO:0004372:glycine hydroxymethyltransferase activity][GO:0019264:glycine biosynthetic process from serine][GO:0035999:tetrahydrofolate interconversion][GO:0005634:nucleus][GO:0016740:transferase activity][GO:0005634:nucleus][GO:0005829:cytosol][GO:0005829:cytosol][GO:0005634:nucleus][GO:0005737:cytoplasm][GO:0042802:identical…	[mmu00260:Glycine, serine and threonine metabolism][mmu00460:Cyanoamino acid metabolism][mmu00630:Glyoxylate and dicarboxylate metabolism][mmu00670:One carbon pool by folate]	-
ENSMUSG00000041930	5	114568016	114613220	3676	+	Fam222a	79.4159	110.503	68.5425	377.021	341.523	301.273	1.71423	2.39836	1.44049	7.54534	6.79088	5.9693	213.046	-1.9717	1.87481e-13	9.24508e-12	DOWN	family with sequence similarity 222, member A [Source:MGI Symbol;Acc:MGI:3605543]	[GO:0003674:molecular_function][GO:0008150:biological_process][GO:0005575:cellular_component]	-	-
ENSMUSG00000073243	X	37209348	37211041	817	-	Gm9	61.0892	69.522	154.511	465.413	477.706	439.144	4.72903	5.41137	11.6454	33.4039	34.0653	31.2044	277.898	-2.2925	2.09419e-13	1.03021e-11	DOWN	predicted gene 9 [Source:MGI Symbol;Acc:MGI:2684855]	[GO:0003674:molecular_function][GO:0008150:biological_process][GO:0005575:cellular_component]	-	-
ENSMUSG00000029729	5	138085084	138107822	25816	+	Zkscan1	212.939	324.192	194.01	853.258	739.434	726.375	1.63025	2.49561	1.44613	6.05659	5.21484	5.10457	508.368	-1.66041	2.22125e-13	1.09011e-11	DOWN	zinc finger with KRAB and SCAN domains 1 [Source:MGI Symbol;Acc:MGI:1921820]	[GO:0006355:regulation of transcription, DNA-templated][GO:0005622:intracellular][GO:0003700:DNA-binding transcription factor activity][GO:0003676:nucleic acid binding][GO:0046872:metal ion binding][GO:0003677:DNA binding][GO:0005634:nucleus][GO:0006355:regulation of transcription, DNA-templated][GO:0003700:DNA-binding transcription factor activity][GO:0003676:nucleic acid binding][GO:0046872:met…	-	zf-C2H2
ENSMUSG00000025839	2	87489087	87497093	3810	-	Pramel7	2.61811	0	0	118.157	94.6901	105.956	0.0889756	0	0	3.72302	2.96437	3.3053	53.5703	-6.89943	2.27171e-13	1.11355e-11	DOWN	preferentially expressed antigen in melanoma like 7 [Source:MGI Symbol;Acc:MGI:2156391]	[GO:0043066:negative regulation of apoptotic process][GO:0045892:negative regulation of transcription, DNA-templated][GO:0045596:negative regulation of cell differentiation][GO:0008284:positive regulation of cell population proliferation][GO:0005737:cytoplasm][GO:0005515:protein binding][GO:0019827:stem cell population maintenance][GO:0070372:regulation of ERK1 and ERK2 cascade][GO:0001825:blasto…	-	-
ENSMUSG00000051323	X	133582860	133688987	26471	-	Pcdh19	50.6167	63.6675	12.7791	333.727	280.879	319.145	0.311136	0.393506	0.0764794	1.90195	1.59045	1.80072	176.802	-2.85246	2.36231e-13	1.15657e-11	DOWN	protocadherin 19 [Source:MGI Symbol;Acc:MGI:2685563]	[GO:0005886:plasma membrane][GO:0016020:membrane][GO:0005509:calcium ion binding][GO:0007156:homophilic cell adhesion via plasma membrane adhesion molecules][GO:0007155:cell adhesion][GO:0007420:brain development][GO:0016021:integral component of membrane][GO:0005887:integral component of plasma membrane][GO:0007155:cell adhesion][GO:0005886:plasma membrane][GO:0016020:membrane][GO:0005509:calciu…	-	-
ENSMUSG00000031362	X	73233688	73243130	5408	-	Xlr4c	32.29	30.0042	39.4991	159.648	178.741	200.423	1.36147	1.27203	1.62148	6.24097	6.94235	7.75689	106.768	-2.41245	2.40066e-13	1.17116e-11	DOWN	X-linked lymphocyte-regulated 4C [Source:MGI Symbol;Acc:MGI:3574099]	[GO:0003674:molecular_function][GO:0007283:spermatogenesis][GO:0007286:spermatid development][GO:0051321:meiotic cell cycle][GO:0000795:synaptonemal complex][GO:0003674:molecular_function][GO:0007283:spermatogenesis][GO:0007286:spermatid development][GO:0051321:meiotic cell cycle][GO:0000795:synaptonemal complex][GO:0003674:molecular_function][GO:0007283:spermatogenesis][GO:0007286:spermatid deve…	-	-
ENSMUSG00000084919	2	162390813	162393945	630	+	Ptprtos	231.266	139.044	160.32	544.786	572.396	616.589	23.2167	14.0352	15.6698	50.7068	52.9334	56.818	377.4	-1.70793	2.55422e-13	1.24312e-11	DOWN	protein tyrosine phosphatase, receptor type T, opposite strand [Source:MGI Symbol;Acc:MGI:1924895]	-	-	-
ENSMUSG00000038976	11	94991035	95006899	8213	+	Ppp1r9b	783.687	693.756	796.952	1896.83	1629.95	1579.13	10.9948	9.78655	10.8859	24.6732	21.0651	20.336	1230.05	-1.16812	2.58243e-13	1.25388e-11	DOWN	protein phosphatase 1, regulatory subunit 9B [Source:MGI Symbol;Acc:MGI:2387581]	[GO:0005515:protein binding][GO:0003779:actin binding][GO:0042127:regulation of cell population proliferation][GO:0008157:protein phosphatase 1 binding][GO:0050804:modulation of chemical synaptic transmission][GO:0016020:membrane][GO:0005886:plasma membrane][GO:0005886:plasma membrane][GO:0005634:nucleus][GO:0019722:calcium-mediated signaling][GO:0005654:nucleoplasm][GO:0005515:protein binding][G…	-	-
ENSMUSG00000024238	18	5591860	5775467	20830	+	Zeb1	179.777	179.294	141.732	545.688	471.323	471.059	1.96002	1.96548	1.50446	5.51598	4.73358	4.71414	331.479	-1.56759	2.76894e-13	1.33654e-11	DOWN	zinc finger E-box binding homeobox 1 [Source:MGI Symbol;Acc:MGI:1344313]	[GO:0003677:DNA binding][GO:0003676:nucleic acid binding][GO:0046872:metal ion binding][GO:0005634:nucleus][GO:0005634:nucleus][GO:0005634:nucleus][GO:0005654:nucleoplasm][GO:0005829:cytosol][GO:0005515:protein binding][GO:0045944:positive regulation of transcription by RNA polymerase II][GO:0045944:positive regulation of transcription by RNA polymerase II][GO:0045944:positive regulation of trans…	-	zf-C2H2
ENSMUSG00000032017	9	42518135	42944493	9300	-	Grik4	1.7454	3.65905	8.13217	101.02	86.1786	79.1481	0.0187513	0.0395259	0.0850607	1.00622	0.852863	0.780507	46.6472	-4.37457	3.21871e-13	1.54638e-11	DOWN	glutamate receptor, ionotropic, kainate 4 [Source:MGI Symbol;Acc:MGI:95817]	[GO:0016020:membrane][GO:0006811:ion transport][GO:0038023:signaling receptor activity][GO:0004970:ionotropic glutamate receptor activity][GO:0005216:ion channel activity][GO:0016021:integral component of membrane][GO:0005886:plasma membrane][GO:0005634:nucleus][GO:0005515:protein binding][GO:0060078:regulation of postsynaptic membrane potential][GO:0030054:cell junction][GO:0045202:synapse][GO:0…	-	-
ENSMUSG00000096449	13	85126550	85127514	965	-	Gm4076	26.1811	24.8816	15.1026	190.314	106.393	223.402	1.71589	1.63967	0.963698	11.5645	6.42334	13.4397	97.7125	-2.95697	3.36396e-13	1.613e-11	DOWN	predicted gene 4076 [Source:MGI Symbol;Acc:MGI:3782251]	-	-	-
ENSMUSG00000033022	18	46713193	46728395	4956	-	Cdo1	249.593	185.88	233.509	613.335	595.803	634.461	9.89695	7.41103	9.01488	22.5485	21.7629	23.0927	418.764	-1.46496	3.42658e-13	1.63858e-11	DOWN	cysteine dioxygenase 1, cytosolic [Source:MGI Symbol;Acc:MGI:105925]	[GO:0055114:oxidation-reduction process][GO:0016702:oxidoreductase activity, acting on single donors with incorporation of molecular oxygen, incorporation of two atoms of oxygen][GO:0005506:iron ion binding][GO:0046872:metal ion binding][GO:0005829:cytosol][GO:0016491:oxidoreductase activity][GO:0051384:response to glucocorticoid][GO:0051213:dioxygenase activity][GO:0008198:ferrous iron binding][…	[mmu00270:Cysteine and methionine metabolism][mmu00430:Taurine and hypotaurine metabolism]	-
ENSMUSG00000020128	11	21239281	21321136	16841	+	Vps54	856.994	955.012	587.839	2212.52	1982.11	2083.38	12.5378	14.0485	8.37317	30.0111	26.7126	27.9778	1446.31	-1.38511	3.46046e-13	1.65285e-11	DOWN	VPS54 GARP complex subunit [Source:MGI Symbol;Acc:MGI:2178798]	[GO:0042147:retrograde transport, endosome to Golgi][GO:0000938:GARP complex][GO:0005794:Golgi apparatus][GO:0048873:homeostasis of number of cells within a tissue][GO:0005654:nucleoplasm][GO:0005794:Golgi apparatus][GO:0048471:perinuclear region of cytoplasm][GO:0015031:protein transport][GO:0005829:cytosol][GO:0042147:retrograde transport, endosome to Golgi][GO:0005802:trans-Golgi network][GO:0…	-	-
ENSMUSG00000035395	X	89403848	89409689	8365	-	Pet2	0	0	0	113.647	82.9868	91.9139	0	0	0	1.59313	1.15583	1.27563	48.0914	-9.17519	3.699e-13	1.76474e-11	DOWN	plasmacytoma expressed transcript 2 [Source:MGI Symbol;Acc:MGI:101758]	[GO:0005515:protein binding][GO:0003674:molecular_function][GO:0008150:biological_process][GO:0005575:cellular_component][GO:0005515:protein binding][GO:0003674:molecular_function][GO:0008150:biological_process][GO:0005575:cellular_component]	-	-
ENSMUSG00000067360	X	135302307	135312652	7371	+	Pramel3	0	0	0	91.0984	72.3475	132.764	0	0	0	1.44452	1.1398	2.08423	49.3684	-9.20923	3.98197e-13	1.89753e-11	DOWN	preferentially expressed antigen in melanoma-like 3 [Source:MGI Symbol;Acc:MGI:1890657]	[GO:0003674:molecular_function][GO:0008150:biological_process][GO:0005737:cytoplasm][GO:0003674:molecular_function][GO:0008150:biological_process][GO:0005737:cytoplasm][GO:0005575:cellular_component]	-	-
ENSMUSG00000044150	X	159526688	159593081	8394	+	Bclaf3	797.65	889.15	381.05	2729.34	2048.07	2523.8	14.9875	16.7984	6.97083	47.5472	35.4491	43.5283	1561.51	-1.81749	4.65354e-13	2.20477e-11	DOWN	Bclaf1 and Thrap3 family member 3 [Source:MGI Symbol;Acc:MGI:2685992]	[GO:0003674:molecular_function][GO:0008150:biological_process][GO:0005575:cellular_component][GO:0005739:mitochondrion][GO:0003674:molecular_function][GO:0008150:biological_process][GO:0005575:cellular_component][GO:0005739:mitochondrion]	-	-
ENSMUSG00000029097	5	35556203	35575070	6357	-	Trmt44	133.523	133.189	146.379	386.943	409.614	416.166	2.22817	2.23479	2.37824	5.98671	6.29666	6.37467	270.969	-1.55542	5.65441e-13	2.66973e-11	DOWN	tRNA methyltransferase 44 [Source:MGI Symbol;Acc:MGI:1926140]	[GO:0046872:metal ion binding][GO:0008168:methyltransferase activity][GO:0016740:transferase activity][GO:0005575:cellular_component][GO:0005737:cytoplasm][GO:0032259:methylation][GO:0008033:tRNA processing][GO:0030488:tRNA methylation][GO:0016300:tRNA (uracil) methyltransferase activity]	-	-
ENSMUSG00000043252	4	15265831	15286753	4670	+	Tmem64	341.227	388.591	299.728	929.925	787.311	892.331	4.62121	5.29155	3.9521	11.6765	9.82208	11.0928	606.519	-1.33893	5.66521e-13	2.67176e-11	DOWN	transmembrane protein 64 [Source:MGI Symbol;Acc:MGI:2140359]	[GO:0016020:membrane][GO:0016021:integral component of membrane][GO:0005515:protein binding][GO:0005783:endoplasmic reticulum][GO:0005783:endoplasmic reticulum][GO:0045600:positive regulation of fat cell differentiation][GO:0051480:regulation of cytosolic calcium ion concentration][GO:0090090:negative regulation of canonical Wnt signaling pathway][GO:0045668:negative regulation of osteoblast diff…	-	-
ENSMUSG00000027490	2	154559407	154569892	5487	-	E2f1	1243.6	1104.3	1232.6	2324.36	2644.94	2442.1	28.5489	25.4902	27.5498	49.4724	55.933	51.4603	1831.98	-1.05001	6.19762e-13	2.90948e-11	DOWN	E2F transcription factor 1 [Source:MGI Symbol;Acc:MGI:101941]	[GO:0006355:regulation of transcription, DNA-templated][GO:0003700:DNA-binding transcription factor activity][GO:0005667:transcription factor complex][GO:0046983:protein dimerization activity][GO:0003677:DNA binding][GO:0005634:nucleus][GO:0005634:nucleus][GO:0005634:nucleus][GO:0005654:nucleoplasm][GO:0032991:protein-containing complex][GO:0005634:nucleus][GO:0005515:protein binding][GO:0005737:…	-	E2F
ENSMUSG00000006345	10	75561604	75586200	17397	+	Ggt1	75.0524	68.7902	111.527	291.334	356.418	333.188	2.19046	2.01871	3.16911	7.8834	9.5824	8.92608	206.052	-1.95243	6.3486e-13	2.97696e-11	DOWN	gamma-glutamyltransferase 1 [Source:MGI Symbol;Acc:MGI:95706]	[GO:0036374:glutathione hydrolase activity][GO:0006751:glutathione catabolic process][GO:0016020:membrane][GO:0016021:integral component of membrane][GO:0016740:transferase activity][GO:0005615:extracellular space][GO:0005886:plasma membrane][GO:0005886:plasma membrane][GO:0016787:hydrolase activity][GO:0006508:proteolysis][GO:0008233:peptidase activity][GO:0007283:spermatogenesis][GO:0005886:pla…	[mmu00430:Taurine and hypotaurine metabolism][mmu00460:Cyanoamino acid metabolism][mmu00480:Glutathione metabolism][mmu00590:Arachidonic acid metabolism]	-
ENSMUSG00000002104	2	91035620	91045729	5200	+	Rapsn	26.1811	33.6633	55.7634	185.805	223.426	219.572	1.03103	1.33296	2.13806	6.78409	8.10517	7.93711	124.068	-2.46158	7.0079e-13	3.27118e-11	DOWN	receptor-associated protein of the synapse [Source:MGI Symbol;Acc:MGI:99422]	[GO:0005515:protein binding][GO:0007268:chemical synaptic transmission][GO:0033130:acetylcholine receptor binding][GO:0045202:synapse][GO:0043495:protein membrane anchor][GO:0005515:protein binding][GO:0007268:chemical synaptic transmission][GO:0033130:acetylcholine receptor binding][GO:0045202:synapse][GO:0043495:protein membrane anchor][GO:0005515:protein binding][GO:0007268:chemical synaptic t…	-	-
ENSMUSG00000059866	5	34496087	34513991	7518	-	Tnip2	198.976	187.343	168.452	487.061	567.077	488.931	6.22372	5.89202	5.12993	14.1248	16.3393	14.0377	349.64	-1.4737	7.32458e-13	3.41124e-11	DOWN	TNFAIP3 interacting protein 2 [Source:MGI Symbol;Acc:MGI:2386643]	[GO:0070530:K63-linked polyubiquitin modification-dependent protein binding][GO:0070530:K63-linked polyubiquitin modification-dependent protein binding][GO:0046872:metal ion binding][GO:0005634:nucleus][GO:0005654:nucleoplasm][GO:0005829:cytosol][GO:0005515:protein binding][GO:0005737:cytoplasm][GO:0005737:cytoplasm][GO:0045944:positive regulation of transcription by RNA polymerase II][GO:0031593…	-	-
ENSMUSG00000031539	8	22787354	22805622	9480	-	Ap3m2	257.447	237.838	235.833	607.022	636.232	597.44	4.76511	4.42633	4.24987	10.4169	10.8479	10.1503	428.635	-1.33178	7.75505e-13	3.59829e-11	DOWN	adaptor-related protein complex 3, mu 2 subunit [Source:MGI Symbol;Acc:MGI:1929214]	[GO:0006886:intracellular protein transport][GO:0016192:vesicle-mediated transport][GO:0030131:clathrin adaptor complex][GO:0016020:membrane][GO:0005794:Golgi apparatus][GO:0015031:protein transport][GO:0030659:cytoplasmic vesicle membrane][GO:0031410:cytoplasmic vesicle][GO:1904115:axon cytoplasm][GO:0008089:anterograde axonal transport][GO:0048490:anterograde synaptic vesicle transport][GO:0006…	-	-
ENSMUSG00000046591	7	79660196	79698148	23142	+	Ticrr	1203.46	1158.46	759.777	3315.62	2476.84	2602.95	10.5728	10.2333	6.49876	27.0068	20.0447	20.9906	1919.52	-1.42605	8.15367e-13	3.77172e-11	DOWN	TOPBP1-interacting checkpoint and replication regulator [Source:MGI Symbol;Acc:MGI:1924261]	[GO:0005634:nucleus][GO:0006260:DNA replication][GO:0010212:response to ionizing radiation][GO:0033314:mitotic DNA replication checkpoint][GO:0005634:nucleus][GO:0005634:nucleus][GO:0005654:nucleoplasm][GO:0003682:chromatin binding][GO:0006281:DNA repair][GO:0006281:DNA repair][GO:0006974:cellular response to DNA damage stimulus][GO:0006260:DNA replication][GO:0007049:cell cycle][GO:0003682:chrom…	-	-
ENSMUSG00000026788	2	33450287	33468559	12912	-	Zbtb43	454.678	437.623	268.361	1079.65	1093.72	1139.99	5.75357	5.56814	3.30629	12.6668	12.7493	13.2414	745.671	-1.50919	8.31884e-13	3.84379e-11	DOWN	zinc finger and BTB domain containing 43 [Source:MGI Symbol;Acc:MGI:1919084]	[GO:0005515:protein binding][GO:0003676:nucleic acid binding][GO:0046872:metal ion binding][GO:0008150:biological_process][GO:0003677:DNA binding][GO:0005634:nucleus][GO:0005515:protein binding][GO:0003676:nucleic acid binding][GO:0005515:protein binding][GO:0005515:protein binding][GO:0005515:protein binding][GO:0003676:nucleic acid binding]	-	ZBTB
ENSMUSG00000038172	4	83220300	83324255	15024	-	Ttc39b	788.05	717.174	388.021	2190.87	1739.53	2024.66	5.64383	5.16442	2.70559	14.5475	11.4762	13.3098	1308.05	-1.65079	8.42032e-13	3.88631e-11	DOWN	tetratricopeptide repeat domain 39B [Source:MGI Symbol;Acc:MGI:1917113]	[GO:0005515:protein binding][GO:0003674:molecular_function][GO:0005575:cellular_component][GO:0006629:lipid metabolic process][GO:0042632:cholesterol homeostasis][GO:0090181:regulation of cholesterol metabolic process][GO:0010874:regulation of cholesterol efflux][GO:0010887:negative regulation of cholesterol storage][GO:0003674:molecular_function][GO:0005575:cellular_component][GO:0006629:lipid m…	-	-
ENSMUSG00000030605	7	79133768	79149060	11794	-	Mfge8	3554.52	3560.99	4269.39	7241.87	7763.52	7776.94	96.4838	97.19	112.83	182.253	194.123	193.769	5694.54	-1.00114	8.94402e-13	4.11876e-11	DOWN	milk fat globule-EGF factor 8 protein [Source:MGI Symbol;Acc:MGI:102768]	[GO:0005615:extracellular space][GO:0016020:membrane][GO:0005615:extracellular space][GO:0009897:external side of plasma membrane][GO:0005576:extracellular region][GO:0007155:cell adhesion][GO:0050766:positive regulation of phagocytosis][GO:0005178:integrin binding][GO:0062023:collagen-containing extracellular matrix][GO:0005201:extracellular matrix structural constituent][GO:0001525:angiogenesis…	-	-
ENSMUSG00000055148	8	72319033	72321656	1847	+	Klf2	1912.96	1860.26	2480.31	4184.21	5234.55	4755.27	65.5043	64.0492	82.6905	132.84	165.115	149.465	3404.59	-1.18122	9.07453e-13	4.17418e-11	DOWN	Kruppel-like factor 2 (lung) [Source:MGI Symbol;Acc:MGI:1342772]	[GO:0003676:nucleic acid binding][GO:0046872:metal ion binding][GO:0003677:DNA binding][GO:0005634:nucleus][GO:0005634:nucleus][GO:0005634:nucleus][GO:0045944:positive regulation of transcription by RNA polymerase II][GO:0045944:positive regulation of transcription by RNA polymerase II][GO:0045944:positive regulation of transcription by RNA polymerase II][GO:0003700:DNA-binding transcription fact…	-	zf-C2H2
ENSMUSG00000053333	1	86703808	87050095	16357	+	Dis3l2	417.152	399.568	388.021	879.415	935.198	916.586	5.03396	4.84824	4.55887	9.83921	10.3959	10.1529	655.99	-1.1801	9.85955e-13	4.53021e-11	DOWN	DIS3 like 3'-5' exoribonuclease 2 [Source:MGI Symbol;Acc:MGI:2442555]	[GO:0003723:RNA binding][GO:0004540:ribonuclease activity][GO:0000175:3'-5'-exoribonuclease activity][GO:0034427:nuclear-transcribed mRNA catabolic process, exonucleolytic, 3'-5'][GO:0046872:metal ion binding][GO:0016787:hydrolase activity][GO:0005737:cytoplasm][GO:0005737:cytoplasm][GO:0005737:cytoplasm][GO:0005737:cytoplasm][GO:0090305:nucleic acid phosphodiester bond hydrolysis][GO:0004518:nuc…	-	-
ENSMUSG00000041670	1	22286251	22805994	39376	-	Rims1	56.7257	44.6404	33.6904	234.511	222.362	187.658	0.556569	0.440397	0.321834	2.1333	2.00976	1.69008	129.931	-2.24711	1.00806e-12	4.6266e-11	DOWN	regulating synaptic membrane exocytosis 1 [Source:MGI Symbol;Acc:MGI:2152971]	[GO:0016020:membrane][GO:0006887:exocytosis][GO:0017137:Rab GTPase binding][GO:0048786:presynaptic active zone][GO:0005515:protein binding][GO:0016020:membrane][GO:0006886:intracellular protein transport][GO:0006887:exocytosis][GO:0017137:Rab GTPase binding][GO:0048786:presynaptic active zone][GO:0046872:metal ion binding][GO:0005515:protein binding][GO:0016020:membrane][GO:0006886:intracellular …	-	-
ENSMUSG00000079628	X	37646500	37651327	2820	-	Rhox4g	44.5078	16.0998	30.2052	193.922	239.385	168.509	1.52902	0.556127	1.01029	6.17667	7.5756	5.31373	115.438	-2.73848	1.01865e-12	4.66531e-11	DOWN	reproductive homeobox 4G [Source:MGI Symbol;Acc:MGI:3613394]	[GO:0003677:DNA binding][GO:0008150:biological_process][GO:0005575:cellular_component][GO:0005634:nucleus]	-	Homeobox
ENSMUSG00000052180	13	33879816	33905708	3306	-	Serpinb6c	46.2532	27.8088	52.2782	193.02	211.723	228.508	2.20445	1.33266	2.42586	8.52929	9.29545	9.99681	126.599	-2.3402	1.01877e-12	4.66531e-11	DOWN	serine (or cysteine) peptidase inhibitor, clade B, member 6c [Source:MGI Symbol;Acc:MGI:2145481]	[GO:0005615:extracellular space][GO:0005615:extracellular space][GO:0005737:cytoplasm][GO:0004867:serine-type endopeptidase inhibitor activity][GO:0010951:negative regulation of endopeptidase activity][GO:0005615:extracellular space][GO:0005615:extracellular space][GO:0005737:cytoplasm][GO:0004867:serine-type endopeptidase inhibitor activity][GO:0010951:negative regulation of endopeptidase activi…	-	-
ENSMUSG00000020644	12	25093799	25097140	4197	-	Id2	235.63	226.129	209.113	611.532	568.141	551.483	7.56858	7.30328	6.53961	18.2118	16.8106	16.2599	400.338	-1.36671	1.052e-12	4.80679e-11	DOWN	inhibitor of DNA binding 2 [Source:MGI Symbol;Acc:MGI:96397]	[GO:0005634:nucleus][GO:0005737:cytoplasm][GO:0046983:protein dimerization activity][GO:0045892:negative regulation of transcription, DNA-templated][GO:0005634:nucleus][GO:0005634:nucleus][GO:0005829:cytosol][GO:0005634:nucleus][GO:0005515:protein binding][GO:0005737:cytoplasm][GO:0005737:cytoplasm][GO:0007275:multicellular organism development][GO:0005737:cytoplasm][GO:0003700:DNA-binding transc…	-	bHLH
ENSMUSG00000024935	19	28835049	28913960	13246	+	Slc1a1	54.9802	59.2766	53.4399	206.55	243.641	227.232	0.915067	0.991989	0.865962	3.18729	3.73543	3.47149	140.853	-2.0107	1.05706e-12	4.82454e-11	DOWN	solute carrier family 1 (neuronal/epithelial high affinity glutamate transporter, system Xag), member 1 [Source:MGI Symbol;Acc:MGI:105083]	[GO:0016021:integral component of membrane][GO:0015293:symporter activity][GO:0016020:membrane][GO:0046872:metal ion binding][GO:0005886:plasma membrane][GO:0051260:protein homooligomerization][GO:0051260:protein homooligomerization][GO:0005886:plasma membrane][GO:0005886:plasma membrane][GO:0016020:membrane][GO:0016324:apical plasma membrane][GO:0005887:integral component of plasma membrane][GO:…	-	-
ENSMUSG00000079479	X	102706890	102707635	420	-	Gm9112	26.1811	38.7859	82.4834	253.452	303.221	311.486	3.94247	5.87262	12.093	35.3856	42.0614	43.0546	169.268	-2.57853	1.0974e-12	5.00309e-11	DOWN	predicted gene 9112 [Source:MGI Symbol;Acc:MGI:3645559]	[GO:0003674:molecular_function][GO:0008150:biological_process][GO:0005575:cellular_component]	-	-
ENSMUSG00000101939	1	24612775	24613119	345	-	Gm28438	82.9067	139.044	84.8069	355.374	403.231	389.357	15.1985	25.6295	15.1366	60.4014	68.094	65.5179	242.453	-1.89486	1.1254e-12	5.11371e-11	DOWN	predicted gene 28438 [Source:MGI Symbol;Acc:MGI:5579144]	-	-	-
ENSMUSG00000026923	2	26457903	26516663	16712	-	Notch1	1090.01	950.622	634.309	2655.38	2117.23	2445.93	7.26581	6.37147	4.11664	16.4109	13.0007	14.9658	1648.91	-1.43061	1.24389e-12	5.62724e-11	DOWN	notch 1 [Source:MGI Symbol;Acc:MGI:97363]	[GO:0006355:regulation of transcription, DNA-templated][GO:0016021:integral component of membrane][GO:0005515:protein binding][GO:0005509:calcium ion binding][GO:0038023:signaling receptor activity][GO:0007275:multicellular organism development][GO:0007219:Notch signaling pathway][GO:0030154:cell differentiation][GO:0050793:regulation of developmental process][GO:0010628:positive regulation of ge…	-	-
ENSMUSG00000054814	5	73998453	74068431	14420	-	Usp46	406.679	388.591	456.563	956.984	953.285	939.564	5.42859	5.21561	5.93365	11.8438	11.722	11.5123	683.611	-1.18895	1.38835e-12	6.26695e-11	DOWN	ubiquitin specific peptidase 46 [Source:MGI Symbol;Acc:MGI:1916977]	[GO:0006511:ubiquitin-dependent protein catabolic process][GO:0036459:thiol-dependent ubiquitinyl hydrolase activity][GO:0016579:protein deubiquitination][GO:0006511:ubiquitin-dependent protein catabolic process][GO:0036459:thiol-dependent ubiquitinyl hydrolase activity][GO:0016579:protein deubiquitination][GO:0046872:metal ion binding][GO:0016787:hydrolase activity][GO:0005634:nucleus][GO:000582…	-	-
ENSMUSG00000038534	11	97050628	97068904	14709	+	Osbpl7	210.321	185.148	263.715	563.727	671.342	612.759	3.52742	3.12226	4.3062	8.76584	10.372	9.43331	417.835	-1.492	1.41645e-12	6.38676e-11	DOWN	oxysterol binding protein-like 7 [Source:MGI Symbol;Acc:MGI:1918490]	[GO:0005829:cytosol][GO:0005829:cytosol][GO:0005886:plasma membrane][GO:0005886:plasma membrane][GO:0043231:intracellular membrane-bounded organelle][GO:0016020:membrane][GO:0006869:lipid transport][GO:0008289:lipid binding][GO:0005776:autophagosome][GO:0071397:cellular response to cholesterol][GO:1901800:positive regulation of proteasomal protein catabolic process][GO:0015248:sterol transporter …	-	-
ENSMUSG00000037020	7	30240138	30280419	15141	-	Wdr62	901.501	822.555	866.657	1725.46	1789.54	1765.51	11.958	10.9707	11.1925	21.2202	21.8664	21.4964	1311.87	-1.02754	1.46063e-12	6.56434e-11	DOWN	WD repeat domain 62 [Source:MGI Symbol;Acc:MGI:1923696]	[GO:0005515:protein binding][GO:0005515:protein binding][GO:0007052:mitotic spindle organization][GO:0007099:centriole replication][GO:0021987:cerebral cortex development][GO:0022008:neurogenesis][GO:0000922:spindle pole][GO:0005634:nucleus][GO:0005813:centrosome][GO:0005815:microtubule organizing center][GO:0005829:cytosol]	-	-
ENSMUSG00000071847	18	62922231	62961179	17643	+	Apcdd1	143.123	123.676	101.071	395.06	383.016	380.421	0.832053	0.722941	0.572078	2.12939	2.05117	2.03005	254.395	-1.65051	1.50495e-12	6.7488e-11	DOWN	adenomatosis polyposis coli down-regulated 1 [Source:MGI Symbol;Acc:MGI:3513977]	[GO:0005887:integral component of plasma membrane][GO:0017147:Wnt-protein binding][GO:0042802:identical protein binding][GO:0030178:negative regulation of Wnt signaling pathway][GO:0001942:hair follicle development][GO:0016020:membrane][GO:0016021:integral component of membrane][GO:0005886:plasma membrane][GO:0042802:identical protein binding][GO:0016055:Wnt signaling pathway][GO:0005886:plasma m…	-	-
ENSMUSG00000071723	X	94636069	94643244	4416	+	Gspt2	179.777	217.348	184.716	509.61	504.305	562.973	4.56446	5.54866	4.56613	11.9962	11.7949	13.1203	359.788	-1.43528	1.72214e-12	7.68917e-11	DOWN	G1 to S phase transition 2 [Source:MGI Symbol;Acc:MGI:1316727]	[GO:0005525:GTP binding][GO:0003924:GTPase activity][GO:0005737:cytoplasm][GO:0000166:nucleotide binding][GO:0005829:cytosol][GO:0006412:translation][GO:0003924:GTPase activity][GO:0007049:cell cycle][GO:0000184:nuclear-transcribed mRNA catabolic process, nonsense-mediated decay][GO:0006412:translation][GO:0003747:translation release factor activity][GO:0002184:cytoplasmic translational terminati…	-	-
ENSMUSG00000052609	12	76530891	76580488	28331	+	Plekhg3	436.351	480.068	346.198	1092.28	1006.48	994.457	4.89227	5.41194	3.77907	11.3542	10.395	10.2344	725.972	-1.28978	1.90438e-12	8.46602e-11	DOWN	pleckstrin homology domain containing, family G (with RhoGef domain) member 3 [Source:MGI Symbol;Acc:MGI:2388284]	[GO:0005089:Rho guanyl-nucleotide exchange factor activity][GO:0035023:regulation of Rho protein signal transduction][GO:0003674:molecular_function][GO:0008150:biological_process][GO:0005575:cellular_component][GO:0005089:Rho guanyl-nucleotide exchange factor activity][GO:0035023:regulation of Rho protein signal transduction][GO:0003674:molecular_function][GO:0008150:biological_process][GO:000557…	-	-
ENSMUSG00000025838	2	87506565	87510872	5701	+	Pramel6	0	0	0	93.8043	85.1147	70.212	0	0	0	3.08844	2.78429	2.28864	41.5218	-8.96379	1.93459e-12	8.58175e-11	DOWN	preferentially expressed antigen in melanoma like 6 [Source:MGI Symbol;Acc:MGI:2156390]	[GO:0043066:negative regulation of apoptotic process][GO:0045892:negative regulation of transcription, DNA-templated][GO:0045596:negative regulation of cell differentiation][GO:0008284:positive regulation of cell population proliferation][GO:0003674:molecular_function][GO:0008150:biological_process][GO:0005737:cytoplasm][GO:0043066:negative regulation of apoptotic process][GO:0045892:negative reg…	-	-
ENSMUSG00000079633	X	37514359	37519176	2744	+	Rhox4d	0	0	0	72.1571	89.3704	86.8076	0	0	0	2.34025	2.87985	2.78734	41.3892	-8.95635	1.95542e-12	8.66482e-11	DOWN	reproductive homeobox 4D [Source:MGI Symbol;Acc:MGI:3613388]	[GO:0003677:DNA binding][GO:0008150:biological_process][GO:0005575:cellular_component][GO:0005634:nucleus]	-	Homeobox
ENSMUSG00000079638	X	37412067	37416806	799	+	Rhox2b	3.49081	12.4408	18.5878	126.275	136.184	109.786	0.276318	0.990165	1.43251	9.26726	9.93006	7.97684	67.794	-3.46242	1.96731e-12	8.70809e-11	DOWN	reproductive homeobox 2B [Source:MGI Symbol;Acc:MGI:3770262]	[GO:0003677:DNA binding][GO:0008150:biological_process][GO:0005575:cellular_component][GO:0005634:nucleus]	-	Homeobox
ENSMUSG00000026005	1	66700831	66719805	9669	+	Rpe	840.412	937.449	690.072	1760.63	1872.52	1912.32	19.5126	21.885	15.5993	37.9003	40.0492	40.7553	1335.57	-1.16589	2.03757e-12	8.9804e-11	DOWN	ribulose-5-phosphate-3-epimerase [Source:MGI Symbol;Acc:MGI:1913896]	[GO:0003824:catalytic activity][GO:0005975:carbohydrate metabolic process][GO:0016857:racemase and epimerase activity, acting on carbohydrates and derivatives][GO:0016857:racemase and epimerase activity, acting on carbohydrates and derivatives][GO:0005975:carbohydrate metabolic process][GO:0003824:catalytic activity][GO:0006098:pentose-phosphate shunt][GO:0004750:ribulose-phosphate 3-epimerase ac…	[mmu00030:Pentose phosphate pathway][mmu00040:Pentose and glucuronate interconversions]	-
ENSMUSG00000006205	7	130936111	130985660	6110	+	Htra1	517.512	502.754	674.97	1294.32	1376.73	1297.01	16.0364	15.6646	20.3638	37.1859	39.2988	36.8918	943.882	-1.22966	2.0719e-12	9.11216e-11	DOWN	HtrA serine peptidase 1 [Source:MGI Symbol;Acc:MGI:1929076]	[GO:0005576:extracellular region][GO:0005515:protein binding][GO:0006508:proteolysis][GO:0004252:serine-type endopeptidase activity][GO:0005520:insulin-like growth factor binding][GO:0005615:extracellular space][GO:0016020:membrane][GO:0005886:plasma membrane][GO:0016787:hydrolase activity][GO:0005515:protein binding][GO:0008233:peptidase activity][GO:0006508:proteolysis][GO:0005737:cytoplasm][GO…	-	-
ENSMUSG00000047881	5	63908897	63968897	7693	-	Rell1	725.216	725.224	561.119	1453.97	1518.23	1584.24	14.152	14.2298	10.6609	26.3061	27.2919	28.3774	1094.67	-1.17731	2.1134e-12	9.26491e-11	DOWN	RELT-like 1 [Source:MGI Symbol;Acc:MGI:2140767]	[GO:0016020:membrane][GO:0016021:integral component of membrane][GO:0003674:molecular_function][GO:0005886:plasma membrane][GO:0015630:microtubule cytoskeleton][GO:0005886:plasma membrane][GO:0005886:plasma membrane][GO:1900745:positive regulation of p38MAPK cascade][GO:1900745:positive regulation of p38MAPK cascade][GO:1900745:positive regulation of p38MAPK cascade][GO:1900745:positive regulatio…	-	-
ENSMUSG00000001131	X	20870166	20874735	1716	+	Timp1	421.515	347.61	407.77	921.807	984.139	859.139	30.1913	25.0345	28.4362	61.2153	64.9336	56.4851	656.997	-1.23416	2.46919e-12	1.07217e-10	DOWN	tissue inhibitor of metalloproteinase 1 [Source:MGI Symbol;Acc:MGI:98752]	[GO:0005515:protein binding][GO:0008191:metalloendopeptidase inhibitor activity][GO:0005615:extracellular space][GO:0007165:signal transduction][GO:0046872:metal ion binding][GO:0005615:extracellular space][GO:0005615:extracellular space][GO:0005125:cytokine activity][GO:0005576:extracellular region][GO:0005615:extracellular space][GO:0031012:extracellular matrix][GO:0031012:extracellular matrix]…	-	-
ENSMUSG00000002010	X	73778963	73786897	8205	-	Idh3g	2269.03	2364.48	2820.7	4788.53	5086.67	5184.2	68.9932	72.2901	83.5046	134.995	142.477	144.693	3752.27	-1.01503	2.52426e-12	1.09377e-10	DOWN	isocitrate dehydrogenase 3 (NAD+), gamma [Source:MGI Symbol;Acc:MGI:1099463]	[GO:0000287:magnesium ion binding][GO:0055114:oxidation-reduction process][GO:0051287:NAD binding][GO:0016616:oxidoreductase activity, acting on the CH-OH group of donors, NAD or NADP as acceptor][GO:0004449:isocitrate dehydrogenase (NAD+) activity][GO:0006099:tricarboxylic acid cycle][GO:0046872:metal ion binding][GO:0005654:nucleoplasm][GO:0000166:nucleotide binding][GO:0005524:ATP binding][GO:…	[mmu00020:Citrate cycle (TCA cycle)]	-
ENSMUSG00000024663	19	10001669	10038380	20303	+	Rab3il1	148.359	236.375	223.054	588.982	603.25	599.993	1.77273	2.83992	2.59492	6.52501	6.64002	6.58075	400.002	-1.56031	2.72873e-12	1.17987e-10	DOWN	RAB3A interacting protein (rabin3)-like 1 [Source:MGI Symbol;Acc:MGI:1922010]	[GO:0005085:guanyl-nucleotide exchange factor activity][GO:0005575:cellular_component][GO:0015031:protein transport][GO:0017112:Rab guanyl-nucleotide exchange factor activity][GO:0019900:kinase binding][GO:0017112:Rab guanyl-nucleotide exchange factor activity][GO:0005085:guanyl-nucleotide exchange factor activity][GO:0005085:guanyl-nucleotide exchange factor activity][GO:0005085:guanyl-nucleotid…	-	-
ENSMUSG00000030956	7	132712082	132813886	27320	-	Fam53b	226.903	198.321	202.142	521.335	542.606	552.76	2.62591	2.30773	2.27763	5.59381	5.78454	5.87188	374.011	-1.36517	2.78846e-12	1.20443e-10	DOWN	family with sequence similarity 53, member B [Source:MGI Symbol;Acc:MGI:1925188]	[GO:0003674:molecular_function][GO:0005634:nucleus][GO:0005634:nucleus][GO:0005634:nucleus][GO:0005634:nucleus][GO:0016055:Wnt signaling pathway][GO:0006606:protein import into nucleus][GO:0090263:positive regulation of canonical Wnt signaling pathway][GO:0090263:positive regulation of canonical Wnt signaling pathway][GO:0060828:regulation of canonical Wnt signaling pathway][GO:0060828:regulation…	-	-
ENSMUSG00000060475	17	12966796	12994169	12384	-	Wtap	1254.07	1269.69	1024.65	2434.4	2443.86	2495.72	24.8869	25.3351	19.7975	44.791	44.6753	45.4615	1820.4	-1.05402	3.17029e-12	1.36077e-10	DOWN	Wilms tumour 1-associating protein [Source:MGI Symbol;Acc:MGI:1926395]	[GO:0005634:nucleus][GO:0080009:mRNA methylation][GO:0000381:regulation of alternative mRNA splicing, via spliceosome][GO:0005654:nucleoplasm][GO:0016607:nuclear speck][GO:0031965:nuclear membrane][GO:0036396:RNA N6-methyladenosine methyltransferase complex][GO:0005634:nucleus][GO:0080009:mRNA methylation][GO:0000381:regulation of alternative mRNA splicing, via spliceosome][GO:0005634:nucleus][GO…	-	-
ENSMUSG00000070780	5	66016549	66173118	33174	-	Rbm47	260.938	229.057	152.188	744.12	564.949	693.184	3.16699	2.7953	1.79835	8.37342	6.31629	7.7225	440.739	-1.63577	3.23801e-12	1.38839e-10	DOWN	RNA binding motif protein 47 [Source:MGI Symbol;Acc:MGI:2384294]	[GO:0003723:RNA binding][GO:0003676:nucleic acid binding][GO:0016554:cytidine to uridine editing][GO:0005634:nucleus][GO:0005634:nucleus][GO:0005634:nucleus][GO:0005515:protein binding][GO:0003729:mRNA binding][GO:0003723:RNA binding][GO:0003723:RNA binding][GO:0002244:hematopoietic progenitor cell differentiation][GO:0016554:cytidine to uridine editing][GO:0003723:RNA binding][GO:0003676:nucleic…	-	-
ENSMUSG00000044681	5	28200819	28245806	10185	-	Cnpy1	82.9067	73.181	91.7773	272.393	265.983	325.528	1.7374	1.54201	1.87255	5.29246	5.13463	6.26182	185.295	-1.80531	3.28043e-12	1.40511e-10	DOWN	canopy FGF signaling regulator 1 [Source:MGI Symbol;Acc:MGI:2442451]	[GO:0003674:molecular_function][GO:0005783:endoplasmic reticulum][GO:0003674:molecular_function][GO:0005783:endoplasmic reticulum][GO:0003674:molecular_function][GO:0005783:endoplasmic reticulum]	-	-
ENSMUSG00000056413	5	139271876	139325622	8537	-	Adap1	276.647	407.618	363.624	896.552	955.412	847.65	6.84265	10.1375	8.75666	20.5601	21.7688	19.2449	624.584	-1.3649	3.4401e-12	1.46891e-10	DOWN	ArfGAP with dual PH domains 1 [Source:MGI Symbol;Acc:MGI:2442201]	[GO:0005096:GTPase activator activity][GO:0043547:positive regulation of GTPase activity][GO:1902936:phosphatidylinositol bisphosphate binding][GO:0046872:metal ion binding][GO:0005634:nucleus][GO:0005829:cytosol][GO:0005737:cytoplasm][GO:0005886:plasma membrane][GO:0005886:plasma membrane][GO:0005096:GTPase activator activity][GO:0043087:regulation of GTPase activity][GO:0005547:phosphatidylinos…	-	-
ENSMUSG00000054793	7	24482023	24504539	2652	+	Cadm4	313.3	448.6	453.078	947.062	1163.94	1041.69	9.16929	13.2011	12.9102	25.6983	31.3799	27.9843	727.946	-1.37617	3.6475e-12	1.55585e-10	DOWN	cell adhesion molecule 4 [Source:MGI Symbol;Acc:MGI:2449088]	[GO:0016020:membrane][GO:0016021:integral component of membrane][GO:0001932:regulation of protein phosphorylation][GO:0044291:cell-cell contact zone][GO:0007155:cell adhesion][GO:0001933:negative regulation of protein phosphorylation][GO:0031252:cell leading edge][GO:0031252:cell leading edge][GO:0001933:negative regulation of protein phosphorylation][GO:0042127:regulation of cell population prol…	-	-
ENSMUSG00000036111	7	109138572	109175207	2966	-	Lmo1	18.3267	27.8088	34.8521	143.412	160.654	164.679	0.904123	1.37943	1.67401	6.55962	7.30092	7.45729	91.6222	-2.54419	4.06018e-12	1.72472e-10	DOWN	LIM domain only 1 [Source:MGI Symbol;Acc:MGI:102812]	[GO:0046872:metal ion binding][GO:0005634:nucleus][GO:0005634:nucleus][GO:0005515:protein binding][GO:0045944:positive regulation of transcription by RNA polymerase II][GO:0045944:positive regulation of transcription by RNA polymerase II][GO:0000122:negative regulation of transcription by RNA polymerase II][GO:0046013:regulation of T cell homeostatic proliferation][GO:0045944:positive regulation …	-	-
ENSMUSG00000028809	4	135320484	135353321	27437	-	Srrm1	5217.89	4835.8	3666.45	10608	9231.75	9965	72.657	67.7062	49.7067	136.952	118.416	127.368	7254.15	-1.11891	4.23604e-12	1.79756e-10	DOWN	serine/arginine repetitive matrix 1 [Source:MGI Symbol;Acc:MGI:1858303]	[GO:0006397:mRNA processing][GO:0006397:mRNA processing][GO:0006397:mRNA processing][GO:0016607:nuclear speck][GO:0071013:catalytic step 2 spliceosome][GO:0006397:mRNA processing][GO:0006397:mRNA processing][GO:0006397:mRNA processing]	-	-
ENSMUSG00000001173	X	47912387	47965868	18668	+	Ocrl	1062.95	949.158	621.53	2346.01	2162.98	2236.57	12.7978	11.4905	7.2857	26.188	23.9893	24.7176	1563.2	-1.35508	4.87997e-12	2.06229e-10	DOWN	OCRL, inositol polyphosphate-5-phosphatase [Source:MGI Symbol;Acc:MGI:109589]	[GO:0007165:signal transduction][GO:0046856:phosphatidylinositol dephosphorylation][GO:0052745:inositol phosphate phosphatase activity][GO:0016020:membrane][GO:0005794:Golgi apparatus][GO:0016787:hydrolase activity][GO:0005634:nucleus][GO:0005794:Golgi apparatus][GO:0043547:positive regulation of GTPase activity][GO:0005737:cytoplasm][GO:0031410:cytoplasmic vesicle][GO:0005886:plasma membrane][GO…	[mmu00562:Inositol phosphate metabolism][mmu04070:Phosphatidylinositol signaling system]	-
ENSMUSG00000049764	10	76032650	76043234	5475	+	Zfp280b	984.408	1053.81	507.68	2571.5	2335.33	2761.25	12.2149	13.1478	6.13326	29.5837	26.6937	31.45	1702.33	-1.58841	4.92098e-12	2.07647e-10	DOWN	zinc finger protein 280B [Source:MGI Symbol;Acc:MGI:1927865]	[GO:0005634:nucleus][GO:0003677:DNA binding][GO:0003700:DNA-binding transcription factor activity][GO:0006355:regulation of transcription, DNA-templated][GO:0003676:nucleic acid binding][GO:0005634:nucleus][GO:0003677:DNA binding][GO:0003700:DNA-binding transcription factor activity][GO:0006355:regulation of transcription, DNA-templated]	-	Others
ENSMUSG00000049577	8	122282141	122337251	5832	+	Zfpm1	606.528	552.517	427.52	1231.18	1321.41	1208.92	11.3157	10.3646	7.76556	21.2962	22.7096	20.7028	891.346	-1.24316	5.0741e-12	2.13554e-10	DOWN	zinc finger protein, multitype 1 [Source:MGI Symbol;Acc:MGI:1095400]	[GO:0003676:nucleic acid binding][GO:0006357:regulation of transcription by RNA polymerase II][GO:0001085:RNA polymerase II transcription factor binding][GO:0060412:ventricular septum morphogenesis][GO:0003151:outflow tract morphogenesis][GO:0046872:metal ion binding][GO:0003677:DNA binding][GO:0005634:nucleus][GO:0005634:nucleus][GO:0005634:nucleus][GO:0005515:protein binding][GO:0045944:positiv…	-	zf-C2H2
ENSMUSG00000021939	14	63122462	63145923	6813	+	Ctsb	2734.18	2439.86	3369.04	5558.8	6638.95	6261.63	36.4589	32.7128	43.7391	68.7241	81.5492	76.6417	4500.41	-1.1121	5.41029e-12	2.27238e-10	DOWN	cathepsin B [Source:MGI Symbol;Acc:MGI:88561]	[GO:0006508:proteolysis][GO:0008234:cysteine-type peptidase activity][GO:0004197:cysteine-type endopeptidase activity][GO:0050790:regulation of catalytic activity][GO:0005615:extracellular space][GO:0005615:extracellular space][GO:0005615:extracellular space][GO:0009897:external side of plasma membrane][GO:0016787:hydrolase activity][GO:0048471:perinuclear region of cytoplasm][GO:0009986:cell sur…	[mmu04142:Lysosome][mmu04612:Antigen processing and presentation]	-
ENSMUSG00000025038	X	17132049	17319368	2554	-	Efhc2	269.665	371.028	325.287	788.316	758.585	911.479	6.6778	9.23831	7.84263	18.0992	17.3044	20.7184	570.727	-1.34598	5.4346e-12	2.28025e-10	DOWN	EF-hand domain (C-terminal) containing 2 [Source:MGI Symbol;Acc:MGI:1921655]	[GO:0003674:molecular_function][GO:0005874:microtubule][GO:1990830:cellular response to leukemia inhibitory factor][GO:0010975:regulation of neuron projection development]	-	-
ENSMUSG00000086784	7	4877153	4896973	2244	+	Isoc2a	377.88	382.005	562.281	1028.24	1223.52	1171.9	10.6503	10.8256	15.4293	26.869	31.7661	30.3179	790.972	-1.37595	6.10824e-12	2.55322e-10	DOWN	isochorismatase domain containing 2a [Source:MGI Symbol;Acc:MGI:3609243]	[GO:0003824:catalytic activity][GO:0003674:molecular_function][GO:0005634:nucleus][GO:0005634:nucleus][GO:0005737:cytoplasm][GO:0005737:cytoplasm][GO:0005737:cytoplasm][GO:0005739:mitochondrion][GO:0031648:protein destabilization]	-	-
ENSMUSG00000092341	19	5795690	5802672	8680	-	Malat1	1968.82	2060.05	1150.12	6274.96	5195.19	3814.43	17.8317	18.7604	10.1419	52.6926	43.3444	31.7116	3410.59	-1.56065	6.11002e-12	2.55322e-10	DOWN	metastasis associated lung adenocarcinoma transcript 1 (non-coding RNA) [Source:MGI Symbol;Acc:MGI:1919539]	-	-	-
ENSMUSG00000053907	6	72432799	72439558	11898	-	Mat2a	924.192	1023.07	870.142	2005.97	1802.3	2001.68	17.2575	19.2087	15.8195	34.7288	31.0018	34.3092	1437.89	-1.04311	6.12018e-12	2.55486e-10	DOWN	methionine adenosyltransferase II, alpha [Source:MGI Symbol;Acc:MGI:2443731]	[GO:0005524:ATP binding][GO:0004478:methionine adenosyltransferase activity][GO:0006556:S-adenosylmethionine biosynthetic process][GO:0016740:transferase activity][GO:0046872:metal ion binding][GO:0000166:nucleotide binding][GO:0006730:one-carbon metabolic process][GO:0005524:ATP binding][GO:0004478:methionine adenosyltransferase activity][GO:0006556:S-adenosylmethionine biosynthetic process][GO:…	-	-
ENSMUSG00000038437	11	97663414	97685463	20564	+	Mllt6	769.723	723.029	587.839	1745.3	1573.56	1418.28	6.69255	6.32105	4.97625	14.0695	12.6033	11.3193	1136.29	-1.186	6.41583e-12	2.67556e-10	DOWN	myeloid/lymphoid or mixed-lineage leukemia; translocated to, 6 [Source:MGI Symbol;Acc:MGI:1935145]	[GO:0046872:metal ion binding][GO:0005575:cellular_component][GO:0045944:positive regulation of transcription by RNA polymerase II][GO:0042393:histone binding][GO:0007588:excretion][GO:0035812:renal sodium excretion][GO:0031491:nucleosome binding][GO:0003014:renal system process][GO:0010765:positive regulation of sodium ion transport][GO:0035811:negative regulation of urine volume][GO:0036359:ren…	-	-
ENSMUSG00000045594	9	114401076	114474898	5202	+	Glb1	1136.26	982.089	935.199	1978.91	2124.68	2294.02	25.6106	22.2572	20.5226	41.3541	44.1142	47.4613	1575.19	-1.06619	6.44657e-12	2.68566e-10	DOWN	galactosidase, beta 1 [Source:MGI Symbol;Acc:MGI:88151]	[GO:0005975:carbohydrate metabolic process][GO:0004553:hydrolase activity, hydrolyzing O-glycosyl compounds][GO:0004565:beta-galactosidase activity][GO:0005615:extracellular space][GO:0016787:hydrolase activity][GO:0016798:hydrolase activity, acting on glycosyl bonds][GO:0008152:metabolic process][GO:0005794:Golgi apparatus][GO:0005737:cytoplasm][GO:0042803:protein homodimerization activity][GO:0…	[mmu00052:Galactose metabolism][mmu00511:Other glycan degradation][mmu00531:Glycosaminoglycan degradation][mmu00600:Sphingolipid metabolism][mmu00604:Glycosphingolipid biosynthesis - ganglio series][mmu04142:Lysosome]	-
ENSMUSG00000027547	2	168748332	168767943	13265	-	Sall4	1950.49	1825.13	1491.67	3900.99	3498.21	3576.98	24.3169	22.879	18.1061	45.0911	40.175	40.9339	2707.25	-1.05859	6.5931e-12	2.74392e-10	DOWN	spalt like transcription factor 4 [Source:MGI Symbol;Acc:MGI:2139360]	[GO:0003676:nucleic acid binding][GO:0046872:metal ion binding][GO:0003677:DNA binding][GO:0005634:nucleus][GO:0005634:nucleus][GO:0005654:nucleoplasm][GO:0032991:protein-containing complex][GO:0005634:nucleus][GO:0005515:protein binding][GO:0005737:cytoplasm][GO:0045944:positive regulation of transcription by RNA polymerase II][GO:0045944:positive regulation of transcription by RNA polymerase II…	-	zf-C2H2
ENSMUSG00000021095	12	104471209	104473330	1268	-	Gsc	2.61811	5.12267	18.5878	88.3925	136.184	134.041	0.130586	0.256912	0.902663	4.08768	6.25719	6.1369	64.1576	-3.84354	7.04085e-12	2.92434e-10	DOWN	goosecoid homeobox [Source:MGI Symbol;Acc:MGI:95841]	[GO:0003677:DNA binding][GO:0006355:regulation of transcription, DNA-templated][GO:0043565:sequence-specific DNA binding][GO:0005634:nucleus][GO:0005634:nucleus][GO:0016604:nuclear body][GO:0005515:protein binding][GO:0007275:multicellular organism development][GO:0000122:negative regulation of transcription by RNA polymerase II][GO:0000978:RNA polymerase II proximal promoter sequence-specific DN…	-	Homeobox
ENSMUSG00000044393	18	20558074	20604521	10309	+	Dsg2	660.636	648.384	250.935	2101.58	1776.77	1817.85	7.24632	7.15096	2.67981	21.3723	17.9527	18.3027	1209.36	-1.8655	7.90752e-12	3.27107e-10	DOWN	desmoglein 2 [Source:MGI Symbol;Acc:MGI:1196466]	[GO:0005886:plasma membrane][GO:0016020:membrane][GO:0005509:calcium ion binding][GO:0007156:homophilic cell adhesion via plasma membrane adhesion molecules][GO:0007155:cell adhesion][GO:0016021:integral component of membrane][GO:0046872:metal ion binding][GO:0030054:cell junction][GO:0005886:plasma membrane][GO:0098609:cell-cell adhesion][GO:0016324:apical plasma membrane][GO:0030054:cell juncti…	-	-
ENSMUSG00000047694	X	98936316	98949017	11043	+	Yipf6	229.521	237.107	230.024	561.924	560.693	568.079	2.78568	2.89354	2.71812	6.3232	6.26871	6.32875	397.891	-1.27858	8.93805e-12	3.67516e-10	DOWN	Yip1 domain family, member 6 [Source:MGI Symbol;Acc:MGI:1925179]	[GO:0016020:membrane][GO:0016021:integral component of membrane][GO:0000139:Golgi membrane][GO:0005794:Golgi apparatus][GO:0042802:identical protein binding][GO:0005783:endoplasmic reticulum][GO:0005802:trans-Golgi network][GO:0005802:trans-Golgi network][GO:0005801:cis-Golgi network][GO:0005797:Golgi medial cisterna][GO:0030134:COPII-coated ER to Golgi transport vesicle][GO:0000138:Golgi trans c…	-	-
ENSMUSG00000027296	2	119742337	119751263	1818	+	Itpka	179.777	162.462	139.409	414.903	467.067	462.123	6.25417	5.68283	4.72185	13.3824	14.9678	14.7569	304.29	-1.47671	8.99324e-12	3.6865e-10	DOWN	inositol 1,4,5-trisphosphate 3-kinase A [Source:MGI Symbol;Acc:MGI:1333822]	[GO:0016301:kinase activity][GO:0032958:inositol phosphate biosynthetic process][GO:0016740:transferase activity][GO:0000166:nucleotide binding][GO:0005524:ATP binding][GO:0016310:phosphorylation][GO:0006468:protein phosphorylation][GO:0005516:calmodulin binding][GO:0043197:dendritic spine][GO:0006020:inositol metabolic process][GO:0061003:positive regulation of dendritic spine morphogenesis][GO:…	[mmu00562:Inositol phosphate metabolism][mmu04020:Calcium signaling pathway][mmu04070:Phosphatidylinositol signaling system]	-
ENSMUSG00000037434	1	191906767	191913247	5921	+	Slc30a1	216.43	281.747	296.243	795.532	639.424	662.546	2.61027	3.41667	3.47858	8.89561	7.10396	7.33473	481.987	-1.40288	9.07985e-12	3.71487e-10	DOWN	solute carrier family 30 (zinc transporter), member 1 [Source:MGI Symbol;Acc:MGI:1345281]	[GO:0016021:integral component of membrane][GO:0055085:transmembrane transport][GO:0008324:cation transmembrane transporter activity][GO:0006812:cation transport][GO:0016020:membrane][GO:0005886:plasma membrane][GO:0005794:Golgi apparatus][GO:0005737:cytoplasm][GO:0006811:ion transport][GO:0005886:plasma membrane][GO:0005794:Golgi apparatus][GO:0005886:plasma membrane][GO:0005783:endoplasmic reti…	-	-
ENSMUSG00000028931	4	152390742	152477910	30891	-	Kcnab2	54.9802	85.6218	73.1895	280.511	273.431	245.104	0.877873	1.37463	1.13779	4.15265	4.02177	3.59233	168.806	-1.90046	9.58195e-12	3.89701e-10	DOWN	potassium voltage-gated channel, shaker-related subfamily, beta member 2 [Source:MGI Symbol;Acc:MGI:109239]	[GO:0016021:integral component of membrane][GO:0005737:cytoplasm][GO:0005249:voltage-gated potassium channel activity][GO:0006813:potassium ion transport][GO:0071805:potassium ion transmembrane transport][GO:0016021:integral component of membrane][GO:0005737:cytoplasm][GO:0005249:voltage-gated potassium channel activity][GO:0006813:potassium ion transport][GO:0016020:membrane][GO:0016020:membrane…	-	-
ENSMUSG00000031145	X	7657260	7668186	9372	+	Prickle3	63.7073	46.8359	53.4399	214.667	218.106	211.913	1.6201	1.19759	1.32314	5.0614	5.10936	4.94666	134.778	-1.97718	1.08297e-11	4.38711e-10	DOWN	prickle planar cell polarity protein 3 [Source:MGI Symbol;Acc:MGI:1859635]	[GO:0008270:zinc ion binding][GO:0016020:membrane][GO:0046872:metal ion binding][GO:0005886:plasma membrane][GO:0008150:biological_process][GO:0005634:nucleus][GO:0005737:cytoplasm][GO:0007275:multicellular organism development][GO:0005813:centrosome][GO:0030030:cell projection organization][GO:0005634:nucleus][GO:0005813:centrosome][GO:0008270:zinc ion binding][GO:0046872:metal ion binding]	-	-
ENSMUSG00000027533	3	10012548	10016607	4225	+	Fabp5	354.317	457.381	411.255	962.396	982.011	885.948	6.92062	8.98273	7.8208	17.4284	17.6691	15.8841	675.551	-1.21022	1.13448e-11	4.59125e-10	DOWN	fatty acid binding protein 5, epidermal [Source:MGI Symbol;Acc:MGI:101790]	[GO:0008289:lipid binding][GO:0016020:membrane][GO:0005886:plasma membrane][GO:0005634:nucleus][GO:0005634:nucleus][GO:0005634:nucleus][GO:0005737:cytoplasm][GO:0005737:cytoplasm][GO:0005737:cytoplasm][GO:0030054:cell junction][GO:0045202:synapse][GO:0045202:synapse][GO:0045211:postsynaptic membrane][GO:0042802:identical protein binding][GO:0005576:extracellular region][GO:0005615:extracellular s…	-	-
ENSMUSG00000031125	X	56136572	56153498	1022	+	3830403N18Rik	0	0	0	84.7846	68.0918	59.9993	0	0	0	4.8646	3.88166	3.40821	35.4793	-8.73725	1.20374e-11	4.85242e-10	DOWN	RIKEN cDNA 3830403N18 gene [Source:MGI Symbol;Acc:MGI:1917941]	[GO:0003674:molecular_function][GO:0007283:spermatogenesis][GO:0007286:spermatid development][GO:0051321:meiotic cell cycle][GO:0000795:synaptonemal complex][GO:0002244:hematopoietic progenitor cell differentiation]	-	-
ENSMUSG00000034254	17	34604262	34613449	10658	+	Agpat1	1104.84	927.204	1215.18	2181.85	2418.32	2242.95	31.907	26.9239	34.1674	58.42	64.3345	59.4575	1681.72	-1.07675	1.27061e-11	5.10694e-10	DOWN	1-acylglycerol-3-phosphate O-acyltransferase 1 (lysophosphatidic acid acyltransferase, alpha) [Source:MGI Symbol;Acc:MGI:1932075]	[GO:0016020:membrane][GO:0008654:phospholipid biosynthetic process][GO:0016746:transferase activity, transferring acyl groups][GO:0003841:1-acylglycerol-3-phosphate O-acyltransferase activity][GO:0016021:integral component of membrane][GO:0016740:transferase activity][GO:0006629:lipid metabolic process][GO:0016746:transferase activity, transferring acyl groups][GO:0016020:membrane][GO:0016021:int…	[mmu00561:Glycerolipid metabolism][mmu00564:Glycerophospholipid metabolism][mmu04975:Fat digestion and absorption]	-
ENSMUSG00000078779	7	27838607	27856438	5399	+	Zfp59	217.303	291.261	202.142	608.826	613.89	698.29	3.99867	5.38901	3.62155	10.3871	10.406	11.7947	438.619	-1.42934	1.27372e-11	5.11442e-10	DOWN	zinc finger protein 59 [Source:MGI Symbol;Acc:MGI:99206]	[GO:0006355:regulation of transcription, DNA-templated][GO:0005622:intracellular][GO:0003676:nucleic acid binding][GO:0046872:metal ion binding][GO:0006355:regulation of transcription, DNA-templated][GO:0005622:intracellular][GO:0003676:nucleic acid binding][GO:0046872:metal ion binding]	-	zf-C2H2
ENSMUSG00000045005	1	64730558	64737751	9810	-	Fzd5	390.098	373.955	283.464	917.297	792.631	870.629	3.56789	3.43901	2.52419	7.77855	6.67809	7.30923	604.679	-1.29768	1.30213e-11	5.2183e-10	DOWN	frizzled class receptor 5 [Source:MGI Symbol;Acc:MGI:108571]	[GO:0016021:integral component of membrane][GO:0005515:protein binding][GO:0016020:membrane][GO:0007166:cell surface receptor signaling pathway][GO:0004888:transmembrane signaling receptor activity][GO:0017147:Wnt-protein binding][GO:0042813:Wnt-activated receptor activity][GO:0048471:perinuclear region of cytoplasm][GO:0000139:Golgi membrane][GO:0005794:Golgi apparatus][GO:0005886:plasma membran…	-	-
ENSMUSG00000001248	7	31130127	31155896	22262	-	Gramd1a	958.227	913.299	1137.34	1996.05	2084.25	2105.08	15.9065	15.2439	18.3816	30.7204	31.8712	32.0756	1532.37	-1.04093	1.37281e-11	5.49618e-10	DOWN	GRAM domain containing 1A [Source:MGI Symbol;Acc:MGI:105490]	[GO:0016020:membrane][GO:0016021:integral component of membrane][GO:0016020:membrane][GO:0016021:integral component of membrane][GO:0005886:plasma membrane][GO:0005886:plasma membrane][GO:0008289:lipid binding][GO:0005783:endoplasmic reticulum][GO:0005789:endoplasmic reticulum membrane][GO:0005789:endoplasmic reticulum membrane][GO:0006869:lipid transport][GO:0030301:cholesterol transport][GO:003…	-	-
ENSMUSG00000058147	X	73254540	73265390	1584	-	Xlr3c	737.433	732.542	878.274	1568.52	1602.28	1771.9	29.4441	29.4093	34.1422	58.065	58.933	64.9402	1215.16	-1.07479	1.40364e-11	5.60869e-10	DOWN	X-linked lymphocyte-regulated 3C [Source:MGI Symbol;Acc:MGI:3047103]	-	-	-
ENSMUSG00000031378	X	73716597	73738534	5971	+	Abcd1	371.771	273.697	360.139	863.18	806.462	785.098	6.44541	4.77114	6.07899	13.8748	12.8796	12.4939	576.724	-1.29043	1.46895e-11	5.84125e-10	DOWN	ATP-binding cassette, sub-family D (ALD), member 1 [Source:MGI Symbol;Acc:MGI:1349215]	[GO:0016021:integral component of membrane][GO:0005524:ATP binding][GO:0055085:transmembrane transport][GO:0006635:fatty acid beta-oxidation][GO:0005777:peroxisome][GO:0042626:ATPase activity, coupled to transmembrane movement of substances][GO:0016887:ATPase activity][GO:0005324:long-chain fatty acid transporter activity][GO:0015910:long-chain fatty acid import into peroxisome][GO:0005778:peroxi…	-	-
ENSMUSG00000040026	7	46711998	46715700	3249	-	Saa3	19.1995	10.9772	26.72	125.373	128.736	139.147	0.551945	0.317303	0.747877	3.34166	3.40919	3.67184	75.0255	-2.81955	1.49478e-11	5.93382e-10	DOWN	serum amyloid A 3 [Source:MGI Symbol;Acc:MGI:98223]	[GO:0005576:extracellular region][GO:0005615:extracellular space][GO:0005615:extracellular space][GO:0009617:response to bacterium][GO:0050918:positive chemotaxis][GO:0006953:acute-phase response][GO:0034364:high-density lipoprotein particle][GO:0060326:cell chemotaxis][GO:0042056:chemoattractant activity][GO:0060326:cell chemotaxis][GO:0071347:cellular response to interleukin-1][GO:0035634:respo…	-	-
ENSMUSG00000116947	16	94011441	94012236	452	+	2410003I16Rik	87.2702	103.917	108.042	290.432	360.674	303.826	12.2112	14.6203	14.7187	37.678	46.4889	39.0227	209.027	-1.67569	1.54342e-11	6.1137e-10	DOWN	RIKEN cDNA 2410003I16 gene [Source:MGI Symbol;Acc:MGI:3026974]	-	-	-
ENSMUSG00000027210	2	115863064	116065839	33172	-	Meis2	102.979	125.14	69.7043	347.256	347.906	342.124	1.1846	1.44743	0.780677	3.70362	3.68665	3.61251	222.518	-1.78957	1.5627e-11	6.18409e-10	DOWN	Meis homeobox 2 [Source:MGI Symbol;Acc:MGI:108564]	[GO:0003677:DNA binding][GO:0006355:regulation of transcription, DNA-templated][GO:0005634:nucleus][GO:0005634:nucleus][GO:0005737:cytoplasm][GO:0007275:multicellular organism development][GO:0045944:positive regulation of transcription by RNA polymerase II][GO:0000978:RNA polymerase II proximal promoter sequence-specific DNA binding][GO:0001228:DNA-binding transcription activator activity, RNA p…	-	Homeobox
ENSMUSG00000000223	X	134404551	134456573	23734	+	Drp2	29.6719	33.6633	5.80869	202.942	184.061	165.956	0.263015	0.300033	0.0501304	1.66786	1.50294	1.3503	103.684	-2.96498	1.61189e-11	6.36649e-10	DOWN	dystrophin related protein 2 [Source:MGI Symbol;Acc:MGI:107432]	[GO:0008270:zinc ion binding][GO:0005515:protein binding][GO:0007417:central nervous system development][GO:0016020:membrane][GO:0046872:metal ion binding][GO:0005886:plasma membrane][GO:0005515:protein binding][GO:0030054:cell junction][GO:0045202:synapse][GO:0045211:postsynaptic membrane][GO:0005886:plasma membrane][GO:0042995:cell projection][GO:0016020:membrane][GO:0014069:postsynaptic densit…	-	-
ENSMUSG00000021752	14	8214140	8223563	4702	+	Kctd6	445.078	409.082	444.946	907.376	1011.8	912.756	9.2232	8.52379	8.97716	17.4334	19.3145	17.362	688.506	-1.12513	1.66684e-11	6.55205e-10	DOWN	potassium channel tetramerisation domain containing 6 [Source:MGI Symbol;Acc:MGI:1918643]	[GO:0005515:protein binding][GO:0051260:protein homooligomerization][GO:0005575:cellular_component][GO:0005737:cytoplasm][GO:0042802:identical protein binding][GO:0016567:protein ubiquitination][GO:0097602:cullin family protein binding][GO:0006511:ubiquitin-dependent protein catabolic process][GO:0031430:M band][GO:0040008:regulation of growth][GO:0030506:ankyrin binding][GO:0045879:negative regu…	-	-
ENSMUSG00000035000	2	62330073	62412231	8166	-	Dpp4	175.413	232.716	152.188	571.845	497.921	529.781	2.10594	2.80923	1.7789	6.36522	5.50666	5.83824	359.977	-1.50773	1.80143e-11	7.0608e-10	DOWN	dipeptidylpeptidase 4 [Source:MGI Symbol;Acc:MGI:94919]	[GO:0006508:proteolysis][GO:0004252:serine-type endopeptidase activity][GO:0008236:serine-type peptidase activity][GO:0016020:membrane][GO:0016021:integral component of membrane][GO:0005886:plasma membrane][GO:0016787:hydrolase activity][GO:0005794:Golgi apparatus][GO:0009986:cell surface][GO:0008233:peptidase activity][GO:0030054:cell junction][GO:0042802:identical protein binding][GO:0042803:pr…	[mmu04974:Protein digestion and absorption]	-
ENSMUSG00000017548	11	79993106	80034123	10979	+	Suz12	2937.52	3792.97	2035.37	7958.93	6630.44	7817.79	42.4845	55.1578	28.6602	106.722	88.3357	103.785	5195.5	-1.35327	1.9988e-11	7.80465e-10	DOWN	SUZ12 polycomb repressive complex 2 subunit [Source:MGI Symbol;Acc:MGI:1261758]	[GO:0046872:metal ion binding][GO:0005634:nucleus][GO:0005634:nucleus][GO:0005634:nucleus][GO:0016604:nuclear body][GO:0005634:nucleus][GO:0005694:chromosome][GO:0003682:chromatin binding][GO:0005515:protein binding][GO:0000978:RNA polymerase II proximal promoter sequence-specific DNA binding][GO:0005730:nucleolus][GO:0000122:negative regulation of transcription by RNA polymerase II][GO:0031490:c…	-	-
ENSMUSG00000031103	X	48411046	48463132	13373	-	Elf4	396.207	272.965	203.304	917.297	834.124	837.438	4.11602	2.85128	2.05631	8.8352	7.98233	7.98562	576.889	-1.56623	2.04535e-11	7.96518e-10	DOWN	E74-like factor 4 (ets domain transcription factor) [Source:MGI Symbol;Acc:MGI:1928377]	[GO:0006355:regulation of transcription, DNA-templated][GO:0003700:DNA-binding transcription factor activity][GO:0043565:sequence-specific DNA binding][GO:0045087:innate immune response][GO:0045944:positive regulation of transcription by RNA polymerase II][GO:0000981:DNA-binding transcription factor activity, RNA polymerase II-specific][GO:0001787:natural killer cell proliferation][GO:0001866:NK …	-	ETS
ENSMUSG00000031176	X	9654267	9663003	3456	-	Dynlt3	485.222	568.617	483.283	1124.75	1079.89	1096.58	14.103	16.6176	13.676	30.3094	28.9132	29.2559	806.391	-1.10136	2.04574e-11	7.96518e-10	DOWN	dynein light chain Tctex-type 3 [Source:MGI Symbol;Acc:MGI:1914367]	[GO:0005634:nucleus][GO:0005515:protein binding][GO:0005737:cytoplasm][GO:0005737:cytoplasm][GO:0005694:chromosome][GO:0042802:identical protein binding][GO:0005856:cytoskeleton][GO:0003774:motor activity][GO:0005874:microtubule][GO:0000775:chromosome, centromeric region][GO:0007049:cell cycle][GO:0051301:cell division][GO:0030286:dynein complex][GO:0005868:cytoplasmic dynein complex][GO:0005868:…	-	-
ENSMUSG00000070509	7	73375509	73419899	12788	+	Rgma	248.72	297.115	236.995	651.218	646.872	612.759	4.38663	5.26891	4.06953	10.6487	10.5095	9.91997	448.946	-1.28471	2.1537e-11	8.34598e-10	DOWN	repulsive guidance molecule family member A [Source:MGI Symbol;Acc:MGI:2679262]	[GO:0015026:coreceptor activity][GO:0010975:regulation of neuron projection development][GO:0030509:BMP signaling pathway][GO:0048681:negative regulation of axon regeneration][GO:0015026:coreceptor activity][GO:0010975:regulation of neuron projection development][GO:0030509:BMP signaling pathway][GO:0048681:negative regulation of axon regeneration][GO:0016020:membrane][GO:0005886:plasma membrane]…	-	-
ENSMUSG00000022912	16	62854307	62929346	4957	+	Pros1	333.372	319.069	252.097	713.453	694.749	854.033	6.38338	6.14304	4.69976	12.666	12.2544	15.0106	527.796	-1.31862	2.42539e-11	9.37232e-10	DOWN	protein S (alpha) [Source:MGI Symbol;Acc:MGI:1095733]	[GO:0005576:extracellular region][GO:0005509:calcium ion binding][GO:0030195:negative regulation of blood coagulation][GO:0005615:extracellular space][GO:0005615:extracellular space][GO:0005615:extracellular space][GO:0032991:protein-containing complex][GO:0050766:positive regulation of phagocytosis][GO:0007596:blood coagulation][GO:0044877:protein-containing complex binding][GO:0007599:hemostasi…	-	-
ENSMUSG00000086475	11	41218837	41221096	375	+	Platr13	63.7073	55.6176	30.2052	206.55	228.746	242.551	10.7445	9.43165	4.95983	32.2979	35.5382	37.5493	137.896	-2.16514	2.56182e-11	9.8624e-10	DOWN	pluripotency associated transcript 13 [Source:MGI Symbol;Acc:MGI:3651752]	-	-	-
ENSMUSG00000070003	8	70597490	70608872	10772	-	Ssbp4	1019.32	870.854	1365.04	2336.09	2805.59	2537.84	35.2665	30.2954	45.9819	74.9365	89.4175	80.5971	1822.46	-1.23997	2.58585e-11	9.93628e-10	DOWN	single stranded DNA binding protein 4 [Source:MGI Symbol;Acc:MGI:1924150]	[GO:0005515:protein binding][GO:0003697:single-stranded DNA binding][GO:0005634:nucleus][GO:0045944:positive regulation of transcription by RNA polymerase II][GO:0000978:RNA polymerase II proximal promoter sequence-specific DNA binding][GO:0005634:nucleus][GO:0045944:positive regulation of transcription by RNA polymerase II][GO:0000978:RNA polymerase II proximal promoter sequence-specific DNA bin…	-	-
ENSMUSG00000061028	7	19581035	19604486	21458	-	Clasrp	569.002	525.44	695.881	1223.06	1384.18	1360.84	7.9179	7.35184	9.42796	15.7796	17.7432	17.3821	959.733	-1.15028	2.87208e-11	1.0944e-09	DOWN	CLK4-associating serine/arginine rich protein [Source:MGI Symbol;Acc:MGI:1855695]	[GO:0003674:molecular_function][GO:0008150:biological_process][GO:0005575:cellular_component][GO:0005634:nucleus][GO:0006397:mRNA processing][GO:0008380:RNA splicing][GO:0005654:nucleoplasm][GO:0003674:molecular_function][GO:0008150:biological_process][GO:0005575:cellular_component][GO:0005634:nucleus][GO:0006397:mRNA processing][GO:0008380:RNA splicing][GO:0005654:nucleoplasm][GO:0003674:molecul…	-	-
ENSMUSG00000073402	17	36164443	36168537	5228	-	Gm8909	45.3805	48.2995	60.4104	220.981	215.979	178.721	2.00989	2.1509	2.60495	9.07419	8.81163	7.26573	128.295	-2.00747	2.89413e-11	1.10076e-09	DOWN	predicted gene 8909 [Source:MGI Symbol;Acc:MGI:3704134]	[GO:0016020:membrane][GO:0016021:integral component of membrane][GO:0009897:external side of plasma membrane][GO:0006955:immune response][GO:0005615:extracellular space][GO:0005886:plasma membrane][GO:0005102:signaling receptor binding][GO:0042605:peptide antigen binding][GO:0001916:positive regulation of T cell mediated cytotoxicity][GO:0002476:antigen processing and presentation of endogenous p…	-	-
ENSMUSG00000072923	X	149594570	149636764	1977	+	Gm10439	4.36351	2.19543	6.97043	85.6866	59.5803	79.1481	0.139592	0.0706187	0.217105	2.54148	1.75578	2.32415	39.6574	-4.11985	3.0571e-11	1.15739e-09	DOWN	predicted gene 10439 [Source:MGI Symbol;Acc:MGI:3710525]	[GO:0003674:molecular_function][GO:0008150:biological_process][GO:0005575:cellular_component]	-	-
ENSMUSG00000028749	4	138750533	138757626	2465	-	Pla2g2f	4.36351	0.73181	4.64695	74.863	62.7721	75.3183	0.111956	0.0188794	0.116083	1.78087	1.48362	1.77384	37.1159	-4.52927	3.1045e-11	1.17317e-09	DOWN	phospholipase A2, group IIF [Source:MGI Symbol;Acc:MGI:1349661]	[GO:0005509:calcium ion binding][GO:0006644:phospholipid metabolic process][GO:0004623:phospholipase A2 activity][GO:0016042:lipid catabolic process][GO:0050482:arachidonic acid secretion][GO:0016020:membrane][GO:0046872:metal ion binding][GO:0005886:plasma membrane][GO:0016787:hydrolase activity][GO:0005576:extracellular region][GO:0006629:lipid metabolic process][GO:0002376:immune system proces…	[mmu00564:Glycerophospholipid metabolism][mmu00565:Ether lipid metabolism][mmu00590:Arachidonic acid metabolism][mmu00591:Linoleic acid metabolism][mmu00592:alpha-Linolenic acid metabolism][mmu04270:Vascular smooth muscle contraction][mmu04972:Pancreatic secretion][mmu04975:Fat digestion and absorption]	-
ENSMUSG00000028517	4	105157347	105232764	3159	+	Plpp3	343.845	226.861	166.129	745.924	764.968	774.885	6.88403	4.56686	3.23826	13.846	14.1081	14.2403	503.769	-1.62962	3.10962e-11	1.17402e-09	DOWN	phospholipid phosphatase 3 [Source:MGI Symbol;Acc:MGI:1915166]	[GO:0006644:phospholipid metabolic process][GO:0042577:lipid phosphatase activity][GO:0030111:regulation of Wnt signaling pathway][GO:0016020:membrane][GO:0016021:integral component of membrane][GO:0016787:hydrolase activity][GO:0005794:Golgi apparatus][GO:0005887:integral component of plasma membrane][GO:0005886:plasma membrane][GO:0007275:multicellular organism development][GO:0098609:cell-cell…	[mmu00561:Glycerolipid metabolism][mmu00564:Glycerophospholipid metabolism][mmu00565:Ether lipid metabolism][mmu00600:Sphingolipid metabolism][mmu04666:Fc gamma R-mediated phagocytosis][mmu04975:Fat digestion and absorption]	-
ENSMUSG00000079387	X	148857640	148924139	4048	+	Luzp4	0	3.65905	4.64695	70.3532	65.9639	76.5949	0	0.114908	0.141306	2.03723	1.89782	2.19586	36.8697	-4.71956	3.17025e-11	1.19472e-09	DOWN	leucine zipper protein 4 [Source:MGI Symbol;Acc:MGI:3708816]	[GO:0003674:molecular_function][GO:0008150:biological_process][GO:0005575:cellular_component][GO:0003674:molecular_function][GO:0008150:biological_process][GO:0005575:cellular_component]	-	-
ENSMUSG00000028278	4	32983037	33022180	14810	+	Rragd	933.791	892.077	659.867	1910.36	1832.09	1773.17	11.6831	11.2225	8.03807	22.1603	21.1155	20.3639	1333.56	-1.14819	3.26808e-11	1.22933e-09	DOWN	Ras-related GTP binding D [Source:MGI Symbol;Acc:MGI:1098604]	[GO:0005525:GTP binding][GO:0003924:GTPase activity][GO:0019003:GDP binding][GO:0046982:protein heterodimerization activity][GO:0051020:GTPase binding][GO:0071233:cellular response to leucine][GO:1904263:positive regulation of TORC1 signaling][GO:1990253:cellular response to leucine starvation][GO:0005634:nucleus][GO:0005654:nucleoplasm][GO:0005737:cytoplasm][GO:0005764:lysosome][GO:0005813:centr…	-	-
ENSMUSG00000024079	17	78852564	78882573	6219	-	Eif2ak2	225.157	215.884	133.6	591.688	551.118	543.824	3.30169	3.18308	1.90741	8.04441	7.44456	7.31997	376.878	-1.5474	3.33143e-11	1.25201e-09	DOWN	eukaryotic translation initiation factor 2-alpha kinase 2 [Source:MGI Symbol;Acc:MGI:1353449]	[GO:0005524:ATP binding][GO:0006468:protein phosphorylation][GO:0004672:protein kinase activity][GO:0016740:transferase activity][GO:0005634:nucleus][GO:0005634:nucleus][GO:0048471:perinuclear region of cytoplasm][GO:0005829:cytosol][GO:0003723:RNA binding][GO:0005515:protein binding][GO:0005737:cytoplasm][GO:0005737:cytoplasm][GO:0005737:cytoplasm][GO:0000166:nucleotide binding][GO:0042802:ident…	[mmu04141:Protein processing in endoplasmic reticulum][mmu05160:Hepatitis C][mmu05162:Measles][mmu05164:Influenza A][mmu05168:Herpes simplex infection][mmu05169:Epstein-Barr virus infection][mmu05203:Viral carcinogenesis]	-
ENSMUSG00000006575	11	102393403	102402555	12737	+	Rundc3a	191.122	207.834	293.92	644.904	688.365	569.355	5.90792	6.45978	8.84585	18.4829	19.6014	16.1551	432.583	-1.46315	3.34576e-11	1.25599e-09	DOWN	RUN domain containing 3A [Source:MGI Symbol;Acc:MGI:1858752]	[GO:0005829:cytosol][GO:0005886:plasma membrane][GO:0010753:positive regulation of cGMP-mediated signaling][GO:0005829:cytosol][GO:0005886:plasma membrane][GO:0010753:positive regulation of cGMP-mediated signaling][GO:0005829:cytosol][GO:0005886:plasma membrane][GO:0010753:positive regulation of cGMP-mediated signaling][GO:0005829:cytosol][GO:0005886:plasma membrane][GO:0010753:positive regulatio…	-	-
ENSMUSG00000036054	8	70234226	70279915	32248	+	Sugp2	664.126	581.057	583.192	1216.75	1323.53	1247.22	5.79512	5.09809	4.95462	9.84382	10.6388	9.98978	935.98	-1.05038	3.64673e-11	1.36055e-09	DOWN	SURP and G patch domain containing 2 [Source:MGI Symbol;Acc:MGI:2678085]	[GO:0008150:biological_process][GO:0005634:nucleus][GO:0003676:nucleic acid binding][GO:0005654:nucleoplasm][GO:0016604:nuclear body][GO:0003723:RNA binding][GO:0006396:RNA processing][GO:0006397:mRNA processing][GO:0008380:RNA splicing][GO:0003723:RNA binding][GO:0006396:RNA processing][GO:0003676:nucleic acid binding][GO:0008150:biological_process][GO:0005634:nucleus][GO:0005654:nucleoplasm][GO…	-	-
ENSMUSG00000028381	4	59189257	59222833	6106	+	Ugcg	521.003	538.612	444.946	1087.77	1090.53	1046.8	8.21314	8.53733	6.82909	15.8985	15.8362	15.1472	788.276	-1.09816	3.70477e-11	1.38095e-09	DOWN	UDP-glucose ceramide glucosyltransferase [Source:MGI Symbol;Acc:MGI:1332243]	[GO:0016757:transferase activity, transferring glycosyl groups][GO:0016020:membrane][GO:0016021:integral component of membrane][GO:0016740:transferase activity][GO:0000139:Golgi membrane][GO:0000139:Golgi membrane][GO:0005794:Golgi apparatus][GO:0006629:lipid metabolic process][GO:0016021:integral component of membrane][GO:0030154:cell differentiation][GO:0006665:sphingolipid metabolic process][G…	[mmu00600:Sphingolipid metabolism]	-
ENSMUSG00000060180	11	67321658	67371586	18538	+	Myh13	17.454	7.3181	16.2643	95.6082	107.457	134.041	0.1821	0.0767696	0.16521	0.924826	1.03275	1.28367	63.0238	-3.06	3.72914e-11	1.38878e-09	DOWN	myosin, heavy polypeptide 13, skeletal muscle [Source:MGI Symbol;Acc:MGI:1339967]	[GO:0005524:ATP binding][GO:0005515:protein binding][GO:0051015:actin filament binding][GO:0003774:motor activity][GO:0016459:myosin complex][GO:0000166:nucleotide binding][GO:0003779:actin binding][GO:0030016:myofibril][GO:0009267:cellular response to starvation][GO:0005524:ATP binding][GO:0005515:protein binding][GO:0051015:actin filament binding][GO:0003774:motor activity][GO:0016459:myosin co…	-	-
ENSMUSG00000056366	10	86731987	86732388	402	-	Fabp3-ps1	91.6337	113.431	184.716	365.295	529.839	528.505	14.4165	17.9437	28.2941	53.2843	76.7877	76.3227	302.237	-1.87621	3.77535e-11	1.40471e-09	DOWN	fatty acid binding protein 3, muscle and heart, pseudogene 1 [Source:MGI Symbol;Acc:MGI:101929]	-	-	-
ENSMUSG00000047557	3	67457998	67463926	2651	-	Lxn	47.9986	52.6903	33.6904	191.216	189.38	192.764	2.72995	3.01324	1.8656	10.0833	9.9221	10.0636	117.957	-2.08038	3.87183e-11	1.43541e-09	DOWN	latexin [Source:MGI Symbol;Acc:MGI:107633]	[GO:0005615:extracellular space][GO:0005737:cytoplasm][GO:0010951:negative regulation of endopeptidase activity][GO:0006954:inflammatory response][GO:0030414:peptidase inhibitor activity][GO:0010466:negative regulation of peptidase activity][GO:0008201:heparin binding][GO:0050965:detection of temperature stimulus involved in sensory perception of pain][GO:0008191:metalloendopeptidase inhibitor ac…	-	-
ENSMUSG00000029246	5	76913249	76951578	10196	-	Ppat	1073.42	1319.45	920.097	2401.03	2295.97	2475.29	16.3274	20.1798	13.6259	33.8605	32.1703	34.5599	1747.54	-1.11265	4.10563e-11	1.51661e-09	DOWN	phosphoribosyl pyrophosphate amidotransferase [Source:MGI Symbol;Acc:MGI:2387203]	[GO:0051289:protein homotetramerization][GO:0006543:glutamine catabolic process][GO:0009168:purine ribonucleoside monophosphate biosynthetic process][GO:0019693:ribose phosphate metabolic process][GO:0004044:amidophosphoribosyltransferase activity][GO:0009113:purine nucleobase biosynthetic process][GO:0009116:nucleoside metabolic process][GO:0004044:amidophosphoribosyltransferase activity][GO:001…	[mmu00230:Purine metabolism][mmu00250:Alanine, aspartate and glutamate metabolism]	-
ENSMUSG00000036766	1	84369839	84696221	6984	-	Dner	56.7257	68.7902	55.7634	226.393	222.362	211.913	0.987788	1.20445	0.94541	3.65509	3.56688	3.38721	140.324	-1.86093	4.20812e-11	1.55191e-09	DOWN	delta/notch-like EGF repeat containing [Source:MGI Symbol;Acc:MGI:2152889]	[GO:0005509:calcium ion binding][GO:0016020:membrane][GO:0016021:integral component of membrane][GO:0005886:plasma membrane][GO:0005886:plasma membrane][GO:0007275:multicellular organism development][GO:0005886:plasma membrane][GO:0030154:cell differentiation][GO:0007219:Notch signaling pathway][GO:0010001:glial cell differentiation][GO:0010001:glial cell differentiation][GO:0030425:dendrite][GO:…	-	-
ENSMUSG00000048175	15	98134637	98165625	5537	-	Asb8	408.425	376.151	357.815	809.062	817.101	878.288	11.6042	10.7459	9.89807	21.3126	21.3858	22.9057	607.807	-1.13111	4.5997e-11	1.69e-09	DOWN	ankyrin repeat and SOCS box-containing 8 [Source:MGI Symbol;Acc:MGI:1925791]	[GO:0005515:protein binding][GO:0035556:intracellular signal transduction][GO:0016567:protein ubiquitination][GO:0005515:protein binding][GO:0035556:intracellular signal transduction][GO:0016567:protein ubiquitination][GO:0005515:protein binding][GO:0035556:intracellular signal transduction][GO:0016567:protein ubiquitination][GO:0005515:protein binding][GO:0035556:intracellular signal transductio…	-	-
ENSMUSG00000055746	X	155027201	155093666	4286	-	Magea2	0	0	0	74.863	44.6852	72.7652	0	0	0	2.60524	1.54503	2.507	32.0522	-8.58854	4.61569e-11	1.69436e-09	DOWN	melanoma antigen, family A, 2 [Source:MGI Symbol;Acc:MGI:1333793]	[GO:0003674:molecular_function][GO:0008150:biological_process][GO:0005575:cellular_component][GO:0003674:molecular_function][GO:0008150:biological_process][GO:0005575:cellular_component][GO:0003674:molecular_function][GO:0008150:biological_process][GO:0005575:cellular_component]	-	-
ENSMUSG00000022003	14	75760117	75787037	6460	-	Slc25a30	695.544	753.765	511.165	1450.36	1504.4	1522.96	12.2603	13.3595	8.77253	23.703	24.4279	24.6415	1073.03	-1.18885	4.74745e-11	1.74117e-09	DOWN	solute carrier family 25, member 30 [Source:MGI Symbol;Acc:MGI:1914804]	[GO:0022857:transmembrane transporter activity][GO:0055085:transmembrane transport][GO:0016020:membrane][GO:0016021:integral component of membrane][GO:0005739:mitochondrion][GO:0005743:mitochondrial inner membrane][GO:1902358:sulfate transmembrane transport][GO:0005739:mitochondrion][GO:0015297:antiporter activity][GO:0005739:mitochondrion][GO:0015116:sulfate transmembrane transporter activity][G…	-	-
ENSMUSG00000025423	18	77065208	77153800	10024	+	Pias2	1429.49	1735.12	1261.65	3133.42	2861.98	3388.05	29.5453	36.0591	25.3883	60.0452	54.4903	64.2775	2301.62	-1.08279	4.85346e-11	1.77827e-09	DOWN	protein inhibitor of activated STAT 2 [Source:MGI Symbol;Acc:MGI:1096566]	[GO:0008270:zinc ion binding][GO:0019789:SUMO transferase activity][GO:0016740:transferase activity][GO:0046872:metal ion binding][GO:0003677:DNA binding][GO:0005634:nucleus][GO:0005634:nucleus][GO:0005634:nucleus][GO:0005654:nucleoplasm][GO:0005515:protein binding][GO:0045893:positive regulation of transcription, DNA-templated][GO:0016607:nuclear speck][GO:0008134:transcription factor binding][G…	[mmu04120:Ubiquitin mediated proteolysis][mmu04630:Jak-STAT signaling pathway][mmu05200:Pathways in cancer][mmu05222:Small cell lung cancer]	zf-MIZ
ENSMUSG00000031357	X	162857057	162888447	2807	-	Syap1	413.661	456.65	357.815	988.552	925.622	860.416	12.5358	13.9145	10.5573	27.7753	25.8396	23.9341	667.119	-1.17381	5.17561e-11	1.88977e-09	DOWN	synapse associated protein 1 [Source:MGI Symbol;Acc:MGI:1914293]	[GO:0016020:membrane][GO:0005794:Golgi apparatus][GO:0005794:Golgi apparatus][GO:0005886:plasma membrane][GO:0005634:nucleus][GO:0005654:nucleoplasm][GO:0005794:Golgi apparatus][GO:0005829:cytosol][GO:0005737:cytoplasm][GO:0030054:cell junction][GO:0045202:synapse][GO:0045211:postsynaptic membrane][GO:0045211:postsynaptic membrane][GO:0030426:growth cone][GO:0030426:growth cone][GO:0042995:cell p…	-	-
ENSMUSG00000035186	17	37193892	37196095	931	+	Ubd	42.7624	99.5262	116.174	328.315	373.441	411.059	2.90498	6.79821	7.68378	20.6786	23.3693	25.6322	228.546	-2.11081	5.20061e-11	1.89721e-09	DOWN	ubiquitin D [Source:MGI Symbol;Acc:MGI:1344410]	[GO:0005515:protein binding][GO:0005634:nucleus][GO:0005634:nucleus][GO:0005634:nucleus][GO:0005634:nucleus][GO:0005737:cytoplasm][GO:0005737:cytoplasm][GO:0006511:ubiquitin-dependent protein catabolic process][GO:0005515:protein binding][GO:0016567:protein ubiquitination][GO:0070628:proteasome binding][GO:0034341:response to interferon-gamma][GO:0016235:aggresome][GO:0001650:fibrillar center][GO…	-	-
ENSMUSG00000024313	18	21061923	21100199	3346	+	Mep1b	3.49081	16.0998	13.9409	92.9023	131.928	112.339	0.0965784	0.44787	0.375517	2.38304	3.36228	2.8529	61.7835	-3.32868	5.2235e-11	1.90218e-09	DOWN	meprin 1 beta [Source:MGI Symbol;Acc:MGI:96964]	[GO:0006508:proteolysis][GO:0004222:metalloendopeptidase activity][GO:0008237:metallopeptidase activity][GO:0008270:zinc ion binding][GO:0005515:protein binding][GO:0016020:membrane][GO:0006508:proteolysis][GO:0004222:metalloendopeptidase activity][GO:0008237:metallopeptidase activity][GO:0016021:integral component of membrane][GO:0046872:metal ion binding][GO:0005886:plasma membrane][GO:0016787:…	[mmu04974:Protein digestion and absorption]	-
ENSMUSG00000054763	14	63046991	63058149	3888	+	Defb42	20.0722	14.6362	4.64695	119.059	113.841	113.616	0.664994	0.487561	0.149892	3.65711	3.47429	3.45512	64.3119	-3.10326	5.39347e-11	1.9606e-09	DOWN	defensin beta 42 [Source:MGI Symbol;Acc:MGI:3033850]	[GO:0042742:defense response to bacterium][GO:0003674:molecular_function][GO:0008150:biological_process][GO:0005575:cellular_component][GO:0005576:extracellular region][GO:0006952:defense response][GO:0042742:defense response to bacterium][GO:0003674:molecular_function][GO:0008150:biological_process][GO:0005575:cellular_component][GO:0005576:extracellular region][GO:0006952:defense response][GO:0…	-	-
ENSMUSG00000037523	2	131234063	131248025	9770	+	Mavs	473.005	345.414	333.419	935.337	889.449	942.117	9.78588	7.18542	6.71601	17.9413	16.9512	17.8912	653.123	-1.26324	5.39889e-11	1.96083e-09	DOWN	mitochondrial antiviral signaling protein [Source:MGI Symbol;Acc:MGI:2444773]	[GO:0005739:mitochondrion][GO:0051607:defense response to virus][GO:0005739:mitochondrion][GO:0051607:defense response to virus][GO:0016020:membrane][GO:0016021:integral component of membrane][GO:0045087:innate immune response][GO:0042742:defense response to bacterium][GO:0007165:signal transduction][GO:0045944:positive regulation of transcription by RNA polymerase II][GO:0005739:mitochondrion][G…	-	-
ENSMUSG00000037169	12	12936093	12941914	5877	-	Mycn	737.433	744.983	564.605	1530.63	1459.72	1434.88	17.4418	17.7171	13.0017	33.5653	31.804	31.1519	1078.71	-1.11032	5.40788e-11	1.96236e-09	DOWN	v-myc avian myelocytomatosis viral related oncogene, neuroblastoma derived [Source:MGI Symbol;Acc:MGI:97357]	[GO:0006355:regulation of transcription, DNA-templated][GO:0005634:nucleus][GO:0003700:DNA-binding transcription factor activity][GO:0046983:protein dimerization activity][GO:0045944:positive regulation of transcription by RNA polymerase II][GO:0003677:DNA binding][GO:0005634:nucleus][GO:0005634:nucleus][GO:0005634:nucleus][GO:0005515:protein binding][GO:0045944:positive regulation of transcripti…	-	bHLH
ENSMUSG00000025938	1	12866549	12992650	36785	-	Slco5a1	64.58	81.9628	41.8226	288.628	215.979	271.912	0.480009	0.612555	0.302656	1.98903	1.47879	1.85516	160.814	-2.02973	5.68421e-11	2.05357e-09	DOWN	solute carrier organic anion transporter family, member 5A1 [Source:MGI Symbol;Acc:MGI:2443431]	[GO:0005515:protein binding][GO:0016020:membrane][GO:0055085:transmembrane transport][GO:0005215:transporter activity][GO:0016021:integral component of membrane][GO:0005886:plasma membrane][GO:0015347:sodium-independent organic anion transmembrane transporter activity][GO:0006811:ion transport][GO:0043252:sodium-independent organic anion transport][GO:0005887:integral component of plasma membrane…	-	-
ENSMUSG00000025090	19	58511993	58553085	1864	+	Ccdc172	14.8359	26.3452	9.2939	107.334	132.992	144.254	0.929938	1.66041	0.567184	6.23772	7.67905	8.29978	72.509	-2.89297	5.83262e-11	2.10533e-09	DOWN	coiled-coil domain containing 172 [Source:MGI Symbol;Acc:MGI:1922895]	[GO:0003674:molecular_function][GO:0008150:biological_process][GO:0005737:cytoplasm][GO:0005737:cytoplasm][GO:0042995:cell projection][GO:0005929:cilium][GO:0097225:sperm midpiece][GO:0097225:sperm midpiece][GO:0097225:sperm midpiece]	-	-
ENSMUSG00000041220	3	129532355	129638495	12006	+	Elovl6	2368.51	2616.95	1658.96	5179.08	4679.18	4978.67	25.1719	27.9649	17.1658	51.0321	45.8093	48.5684	3580.23	-1.15807	7.26078e-11	2.60254e-09	DOWN	ELOVL family member 6, elongation of long chain fatty acids (yeast) [Source:MGI Symbol;Acc:MGI:2156528]	[GO:0016021:integral component of membrane][GO:0005783:endoplasmic reticulum][GO:0009922:fatty acid elongase activity][GO:0019367:fatty acid elongation, saturated fatty acid][GO:0042761:very long-chain fatty acid biosynthetic process][GO:0016020:membrane][GO:0016740:transferase activity][GO:0005783:endoplasmic reticulum][GO:0006629:lipid metabolic process][GO:0005789:endoplasmic reticulum membran…	[mmu00062:Fatty acid elongation][mmu01040:Biosynthesis of unsaturated fatty acids]	-
ENSMUSG00000086189	3	30686085	30692366	4580	+	Gm15462	2.61811	0	0	100.118	55.3246	75.3183	0.0361536	0	0	1.28182	0.703763	0.954698	38.8965	-6.43378	7.43349e-11	2.65749e-09	DOWN	predicted gene 15462 [Source:MGI Symbol;Acc:MGI:3705271]	-	-	-
ENSMUSG00000015290	X	74365718	74373218	8146	-	Ubl4a	519.258	480.068	607.589	1065.22	1359.71	1170.63	13.4483	12.5015	15.3208	25.5784	32.4395	27.8293	867.078	-1.16372	7.90953e-11	2.82276e-09	DOWN	ubiquitin-like 4A [Source:MGI Symbol;Acc:MGI:95049]	[GO:0005515:protein binding][GO:0005634:nucleus][GO:0005634:nucleus][GO:0005654:nucleoplasm][GO:0005829:cytosol][GO:0005737:cytoplasm][GO:0005737:cytoplasm][GO:0016020:membrane][GO:0005829:cytosol][GO:0005829:cytosol][GO:0051087:chaperone binding][GO:0071816:tail-anchored membrane protein insertion into ER membrane][GO:0071816:tail-anchored membrane protein insertion into ER membrane][GO:0051087:…	-	-
ENSMUSG00000095562	X	170009659	170019281	3267	+	Gm21887	279.265	316.874	490.253	801.846	1501.21	1150.2	15.1868	17.3266	25.9572	40.4289	75.2031	57.4149	756.608	-1.67125	8.09454e-11	2.88628e-09	DOWN	predicted gene, 21887 [Source:MGI Symbol;Acc:MGI:5434051]	-	-	-
ENSMUSG00000022119	14	105106751	105177327	18413	-	Rbm26	955.609	1069.91	584.354	2667.11	1906.57	2451.04	14.349	16.1534	8.54288	37.1307	26.3717	33.7825	1605.76	-1.42654	8.42836e-11	3.0027e-09	DOWN	RNA binding motif protein 26 [Source:MGI Symbol;Acc:MGI:1921463]	[GO:0003676:nucleic acid binding][GO:0003723:RNA binding][GO:0046872:metal ion binding][GO:0003676:nucleic acid binding][GO:0006397:mRNA processing][GO:0003723:RNA binding][GO:0046872:metal ion binding][GO:0003676:nucleic acid binding][GO:0006397:mRNA processing][GO:0003723:RNA binding][GO:0046872:metal ion binding][GO:0003676:nucleic acid binding][GO:0006397:mRNA processing][GO:0003723:RNA bindi…	-	-
ENSMUSG00000064354	MT	7013	7696	684	+	mt-Co2	336.863	589.107	565.766	1550.48	1099.04	1516.58	31.1478	54.7703	50.9328	132.92	93.6123	128.718	942.973	-1.48203	8.56298e-11	3.04538e-09	DOWN	mitochondrially encoded cytochrome c oxidase II [Source:MGI Symbol;Acc:MGI:102503]	[GO:0016021:integral component of membrane][GO:0016020:membrane][GO:0016491:oxidoreductase activity][GO:0005507:copper ion binding][GO:0004129:cytochrome-c oxidase activity][GO:0022900:electron transport chain][GO:0046872:metal ion binding][GO:0055114:oxidation-reduction process][GO:0005739:mitochondrion][GO:0005743:mitochondrial inner membrane][GO:1902600:proton transmembrane transport][GO:00057…	-	-
ENSMUSG00000026458	1	134296783	134332928	23134	-	Ppfia4	701.653	679.12	635.471	1493.65	1318.21	1288.07	7.31439	7.11835	6.44968	14.4363	12.6586	12.3253	1019.36	-1.02381	8.7244e-11	3.09887e-09	DOWN	protein tyrosine phosphatase, receptor type, f polypeptide (PTPRF), interacting protein (liprin), alpha 4 [Source:MGI Symbol;Acc:MGI:1915757]	[GO:0005515:protein binding][GO:0048786:presynaptic active zone][GO:0008150:biological_process][GO:0005515:protein binding][GO:0045202:synapse][GO:0005515:protein binding][GO:0048786:presynaptic active zone][GO:0008150:biological_process][GO:0005515:protein binding][GO:0045202:synapse][GO:0005515:protein binding][GO:0048786:presynaptic active zone][GO:0008150:biological_process][GO:0005515:protei…	-	-
ENSMUSG00000026307	1	91298338	91321075	9835	+	Scly	291.483	294.92	270.685	631.375	720.283	620.419	8.01172	8.15068	7.24376	16.0898	18.2373	15.6531	471.527	-1.20108	8.72848e-11	3.09887e-09	DOWN	selenocysteine lyase [Source:MGI Symbol;Acc:MGI:1355310]	[GO:0003824:catalytic activity][GO:0009000:selenocysteine lyase activity][GO:0016597:amino acid binding][GO:0042803:protein homodimerization activity][GO:0070279:vitamin B6 binding][GO:0016261:selenocysteine catabolic process][GO:1902494:catalytic complex][GO:0003824:catalytic activity][GO:0003824:catalytic activity][GO:0003824:catalytic activity][GO:0003824:catalytic activity][GO:0003824:catalyt…	[mmu00450:Selenocompound metabolism]	-
ENSMUSG00000017677	11	79239372	79254671	9803	-	Wsb1	1253.2	1725.61	1279.07	3008.05	2935.39	3012.73	32.011	44.3199	31.8098	71.2386	69.07	70.6384	2202.34	-1.07173	8.96383e-11	3.17968e-09	DOWN	WD repeat and SOCS box-containing 1 [Source:MGI Symbol;Acc:MGI:1926139]	[GO:0005515:protein binding][GO:0035556:intracellular signal transduction][GO:0008150:biological_process][GO:0016567:protein ubiquitination][GO:0005575:cellular_component][GO:0003674:molecular_function]	-	-
ENSMUSG00000025283	X	155213132	155216449	7255	-	Sat1	775.832	863.536	959.596	1634.36	1838.48	1797.43	36.2929	40.6173	43.7047	70.8845	79.2238	77.1801	1311.54	-1.02064	9.40803e-11	3.33437e-09	DOWN	spermidine/spermine N1-acetyl transferase 1 [Source:MGI Symbol;Acc:MGI:98233]	[GO:0005515:protein binding][GO:0004145:diamine N-acetyltransferase activity][GO:0016740:transferase activity][GO:0005829:cytosol][GO:0005829:cytosol][GO:0005737:cytoplasm][GO:0042802:identical protein binding][GO:0016746:transferase activity, transferring acyl groups][GO:0042127:regulation of cell population proliferation][GO:0006595:polyamine metabolic process][GO:0008080:N-acetyltransferase ac…	[mmu00330:Arginine and proline metabolism]	-
ENSMUSG00000073207	X	52791200	52799468	1536	+	Ccdc160	328.136	385.664	406.608	830.709	795.822	859.139	13.5112	15.9671	16.3005	31.7131	30.1855	32.4716	601.013	-1.15054	9.68153e-11	3.42834e-09	DOWN	coiled-coil domain containing 160 [Source:MGI Symbol;Acc:MGI:3588225]	[GO:0003674:molecular_function][GO:0008150:biological_process][GO:0005575:cellular_component]	-	-
ENSMUSG00000021090	12	72441866	72530750	26179	+	Lrrc9	68.0708	43.1768	62.7339	202.04	229.81	233.614	0.908456	0.579389	0.815139	2.49995	2.82524	2.86183	139.908	-1.94166	1.04168e-10	3.68236e-09	DOWN	leucine rich repeat containing 9 [Source:MGI Symbol;Acc:MGI:1925507]	[GO:0005515:protein binding][GO:0003674:molecular_function][GO:0008150:biological_process][GO:0005575:cellular_component][GO:0005515:protein binding][GO:0005515:protein binding]	-	-
ENSMUSG00000037820	2	158116402	158146436	6572	-	Tgm2	102.979	106.844	82.4834	332.825	298.965	274.465	1.81117	1.88946	1.41242	5.42721	4.84368	4.43096	199.76	-1.62804	1.06314e-10	3.755e-09	DOWN	transglutaminase 2, C polypeptide [Source:MGI Symbol;Acc:MGI:98731]	[GO:0018149:peptide cross-linking][GO:0003810:protein-glutamine gamma-glutamyltransferase activity][GO:0016020:membrane][GO:0016740:transferase activity][GO:0046872:metal ion binding][GO:0005829:cytosol][GO:0005737:cytoplasm][GO:0007186:G protein-coupled receptor signaling pathway][GO:0051260:protein homooligomerization][GO:0005886:plasma membrane][GO:0005525:GTP binding][GO:0018149:peptide cross…	[mmu05016:Huntington's disease]	-
ENSMUSG00000046873	X	157535371	157598715	18399	-	Mbtps2	391.843	491.777	246.288	1141.89	921.367	1214.03	5.16622	6.51936	3.16148	13.9583	11.1902	14.6923	734.532	-1.53174	1.11892e-10	3.94184e-09	DOWN	membrane-bound transcription factor peptidase, site 2 [Source:MGI Symbol;Acc:MGI:2444506]	[GO:0005515:protein binding][GO:0016020:membrane][GO:0006508:proteolysis][GO:0004222:metalloendopeptidase activity][GO:0016021:integral component of membrane][GO:0046872:metal ion binding][GO:0016787:hydrolase activity][GO:0005737:cytoplasm][GO:0008233:peptidase activity][GO:0005737:cytoplasm][GO:0005737:cytoplasm][GO:0006629:lipid metabolic process][GO:0008202:steroid metabolic process][GO:00082…	[mmu04141:Protein processing in endoplasmic reticulum]	zf-C2H2
ENSMUSG00000035649	4	44755877	44932215	19627	+	Zcchc7	530.603	468.359	523.944	1112.12	1058.61	993.181	7.12641	6.32494	6.85129	13.8485	13.0973	12.2442	781.137	-1.05636	1.25513e-10	4.39907e-09	DOWN	zinc finger, CCHC domain containing 7 [Source:MGI Symbol;Acc:MGI:2442912]	[GO:0008270:zinc ion binding][GO:0003676:nucleic acid binding][GO:0046872:metal ion binding][GO:0008150:biological_process][GO:0005634:nucleus][GO:0005829:cytosol][GO:0005730:nucleolus][GO:0005730:nucleolus][GO:0005829:cytosol][GO:0008270:zinc ion binding][GO:0003676:nucleic acid binding][GO:0046872:metal ion binding][GO:0008150:biological_process][GO:0005634:nucleus][GO:0005829:cytosol][GO:00057…	-	-
ENSMUSG00000115318	15	33831448	33834353	2906	+	Gm49089	0	0	0	61.3335	51.0688	58.7228	0	0	0	1.23761	1.02384	1.17312	28.5209	-8.42037	1.26167e-10	4.41821e-09	DOWN	predicted gene, 49089 [Source:MGI Symbol;Acc:MGI:6118479]	-	-	-
ENSMUSG00000035547	7	98121559	98178274	8220	-	Capn5	815.977	842.314	618.045	1591.97	1609.73	1649.34	11.4733	11.9086	8.46091	20.7537	20.8501	21.2874	1187.9	-1.08942	1.39918e-10	4.88311e-09	DOWN	calpain 5 [Source:MGI Symbol;Acc:MGI:1100859]	[GO:0005622:intracellular][GO:0006508:proteolysis][GO:0004198:calcium-dependent cysteine-type endopeptidase activity][GO:0016787:hydrolase activity][GO:0009986:cell surface][GO:0008233:peptidase activity][GO:0008234:cysteine-type peptidase activity][GO:0005737:cytoplasm][GO:0009986:cell surface][GO:0045202:synapse][GO:0006508:proteolysis][GO:0004198:calcium-dependent cysteine-type endopeptidase a…	-	-
ENSMUSG00000059182	6	51857422	52012549	15096	-	Skap2	761.869	709.856	621.53	1458.48	1352.26	1442.54	8.17246	7.65631	6.49114	14.5052	13.3622	14.2037	1057.75	-1.0216	1.4568e-10	5.07986e-09	DOWN	src family associated phosphoprotein 2 [Source:MGI Symbol;Acc:MGI:1889206]	[GO:0005515:protein binding][GO:0005654:nucleoplasm][GO:0005829:cytosol][GO:0005737:cytoplasm][GO:0005737:cytoplasm][GO:0005886:plasma membrane][GO:0005886:plasma membrane][GO:0005737:cytoplasm][GO:0008285:negative regulation of cell population proliferation][GO:0005515:protein binding][GO:0042113:B cell activation][GO:0005654:nucleoplasm][GO:0005829:cytosol][GO:0005886:plasma membrane][GO:000551…	-	-
ENSMUSG00000035158	6	97807052	98021349	17286	+	Mitf	47.1259	49.0313	5.80869	250.746	218.106	320.422	0.610634	0.638809	0.0732801	3.01235	2.60336	3.81105	148.54	-2.92647	1.50756e-10	5.23465e-09	DOWN	melanogenesis associated transcription factor [Source:MGI Symbol;Acc:MGI:104554]	[GO:0006355:regulation of transcription, DNA-templated][GO:0005634:nucleus][GO:0003700:DNA-binding transcription factor activity][GO:0006357:regulation of transcription by RNA polymerase II][GO:0046983:protein dimerization activity][GO:0006355:regulation of transcription, DNA-templated][GO:0005634:nucleus][GO:0003700:DNA-binding transcription factor activity][GO:0006357:regulation of transcriptio…	-	bHLH
ENSMUSG00000052942	19	28258851	28680077	22560	-	Glis3	150.105	121.481	123.144	404.08	331.947	371.485	1.26344	1.02812	1.00916	3.15338	2.57378	2.87013	250.374	-1.4883	1.55185e-10	5.38391e-09	DOWN	GLIS family zinc finger 3 [Source:MGI Symbol;Acc:MGI:2444289]	[GO:0005634:nucleus][GO:0003676:nucleic acid binding][GO:0006357:regulation of transcription by RNA polymerase II][GO:0005634:nucleus][GO:0003676:nucleic acid binding][GO:0006357:regulation of transcription by RNA polymerase II][GO:0046872:metal ion binding][GO:0003677:DNA binding][GO:0005634:nucleus][GO:0045944:positive regulation of transcription by RNA polymerase II][GO:0000977:RNA polymerase …	-	zf-C2H2
ENSMUSG00000046312	4	41495604	41503076	4898	-	Myorg	270.538	208.566	259.068	589.884	636.232	561.696	4.10024	3.17835	3.8228	8.28894	8.88262	7.81418	420.997	-1.27891	1.60948e-10	5.56505e-09	DOWN	myogenesis regulating glycosidase (putative) [Source:MGI Symbol;Acc:MGI:2140300]	[GO:0005975:carbohydrate metabolic process][GO:0004553:hydrolase activity, hydrolyzing O-glycosyl compounds][GO:0016020:membrane][GO:0016021:integral component of membrane][GO:0016787:hydrolase activity][GO:0005634:nucleus][GO:0016798:hydrolase activity, acting on glycosyl bonds][GO:0008152:metabolic process][GO:0005515:protein binding][GO:0031965:nuclear membrane][GO:0005783:endoplasmic reticulu…	-	-
ENSMUSG00000079637	X	37453680	37469861	2628	+	Rhox2c	6.98162	9.51353	8.13217	76.6669	85.1147	77.8715	0.57947	0.793951	0.657155	5.89975	6.50764	5.93272	44.0467	-3.27585	1.74408e-10	6.02031e-09	DOWN	reproductive homeobox 2C [Source:MGI Symbol;Acc:MGI:3770266]	[GO:0003677:DNA binding][GO:0008150:biological_process][GO:0005575:cellular_component][GO:0005634:nucleus][GO:0003677:DNA binding][GO:0008150:biological_process][GO:0005575:cellular_component][GO:0005634:nucleus][GO:0003677:DNA binding][GO:0008150:biological_process][GO:0005575:cellular_component][GO:0005634:nucleus][GO:0003677:DNA binding][GO:0008150:biological_process][GO:0005575:cellular_compo…	-	Homeobox
ENSMUSG00000031840	8	70754679	70758677	6916	+	Rab3a	82.9067	76.8401	88.2921	253.452	285.134	239.997	3.36985	3.1404	3.49405	9.55139	10.6761	8.95422	171.104	-1.65405	1.86983e-10	6.43813e-09	DOWN	RAB3A, member RAS oncogene family [Source:MGI Symbol;Acc:MGI:97843]	[GO:0005525:GTP binding][GO:0003924:GTPase activity][GO:0016020:membrane][GO:0005886:plasma membrane][GO:0032991:protein-containing complex][GO:0048471:perinuclear region of cytoplasm][GO:0005829:cytosol][GO:0005515:protein binding][GO:0015031:protein transport][GO:0005737:cytoplasm][GO:0000166:nucleotide binding][GO:0031410:cytoplasmic vesicle][GO:0005886:plasma membrane][GO:0016020:membrane][GO…	-	-
ENSMUSG00000038679	15	50654752	50890463	37242	-	Trps1	95.1246	69.522	17.4261	455.492	294.71	342.124	0.610225	0.448431	0.108839	2.70912	1.74155	2.01456	212.4	-2.57144	1.9726e-10	6.77495e-09	DOWN	transcriptional repressor GATA binding 1 [Source:MGI Symbol;Acc:MGI:1927616]	[GO:0008270:zinc ion binding][GO:0006355:regulation of transcription, DNA-templated][GO:0005634:nucleus][GO:0003700:DNA-binding transcription factor activity][GO:0043565:sequence-specific DNA binding][GO:0003676:nucleic acid binding][GO:0046872:metal ion binding][GO:0008270:zinc ion binding][GO:0006355:regulation of transcription, DNA-templated][GO:0005634:nucleus][GO:0003700:DNA-binding transcri…	-	zf-GATA
ENSMUSG00000024867	19	24294794	24555872	7237	-	Pip5k1b	98.6154	120.017	148.702	392.354	339.395	348.507	2.42401	2.96626	3.55873	8.94168	7.68492	7.86325	241.265	-1.56232	1.98637e-10	6.81655e-09	DOWN	phosphatidylinositol-4-phosphate 5-kinase, type 1 beta [Source:MGI Symbol;Acc:MGI:107930]	[GO:0016307:phosphatidylinositol phosphate kinase activity][GO:0046488:phosphatidylinositol metabolic process][GO:0016020:membrane][GO:0016740:transferase activity][GO:0005829:cytosol][GO:0005515:protein binding][GO:0000166:nucleotide binding][GO:0005524:ATP binding][GO:0016301:kinase activity][GO:0016310:phosphorylation][GO:0012505:endomembrane system][GO:0046488:phosphatidylinositol metabolic p…	[mmu00562:Inositol phosphate metabolism][mmu04070:Phosphatidylinositol signaling system][mmu04144:Endocytosis][mmu04666:Fc gamma R-mediated phagocytosis][mmu04810:Regulation of actin cytoskeleton]	-
ENSMUSG00000039542	9	49502136	49798925	21854	-	Ncam1	237.375	177.83	152.188	560.12	508.56	479.995	2.28716	1.72283	1.42767	5.00372	4.51386	4.2452	352.678	-1.44632	2.04715e-10	7.00172e-09	DOWN	neural cell adhesion molecule 1 [Source:MGI Symbol;Acc:MGI:97281]	[GO:0005515:protein binding][GO:0016020:membrane][GO:0007155:cell adhesion][GO:0016021:integral component of membrane][GO:0005515:protein binding][GO:0016020:membrane][GO:0007155:cell adhesion][GO:0016021:integral component of membrane][GO:0005515:protein binding][GO:0016020:membrane][GO:0007155:cell adhesion][GO:0016021:integral component of membrane][GO:0005829:cytosol][GO:0005886:plasma membra…	-	-
ENSMUSG00000045441	6	59347226	59426294	8339	-	Gprin3	0	0	0	67.6473	54.2606	43.4038	0	0	0	0.475683	0.379092	0.302165	27.5519	-8.37302	2.13654e-10	7.30138e-09	DOWN	GPRIN family member 3 [Source:MGI Symbol;Acc:MGI:1924785]	[GO:0003674:molecular_function][GO:0008150:biological_process][GO:0005575:cellular_component]	-	-
ENSMUSG00000026958	2	25352276	25356359	12208	-	Dpp7	352.572	334.437	473.989	819.885	938.39	997.01	7.39098	7.0493	9.67408	15.9352	18.121	19.1847	652.714	-1.24979	2.25791e-10	7.69057e-09	DOWN	dipeptidylpeptidase 7 [Source:MGI Symbol;Acc:MGI:1933213]	[GO:0006508:proteolysis][GO:0008236:serine-type peptidase activity][GO:0016787:hydrolase activity][GO:0005794:Golgi apparatus][GO:0005829:cytosol][GO:0008233:peptidase activity][GO:0031410:cytoplasmic vesicle][GO:0005576:extracellular region][GO:0004177:aminopeptidase activity][GO:0043231:intracellular membrane-bounded organelle][GO:0005764:lysosome][GO:0006508:proteolysis][GO:0006508:proteolysis…	-	-
ENSMUSG00000036977	8	79711820	79779059	7976	+	Anapc10	445.951	444.209	590.163	1156.32	986.267	1196.16	6.14341	6.153	7.91555	14.769	12.5159	15.1256	803.177	-1.17593	2.4672e-10	8.38949e-09	DOWN	anaphase promoting complex subunit 10 [Source:MGI Symbol;Acc:MGI:1916249]	[GO:0005680:anaphase-promoting complex][GO:0031145:anaphase-promoting complex-dependent catabolic process][GO:0005737:cytoplasm][GO:0005515:protein binding][GO:0016567:protein ubiquitination][GO:0007049:cell cycle][GO:0051301:cell division][GO:0005680:anaphase-promoting complex][GO:0070979:protein K11-linked ubiquitination][GO:0070979:protein K11-linked ubiquitination][GO:0005680:anaphase-promoti…	-	-
ENSMUSG00000022033	14	65805837	65817822	2587	+	Pbk	479.114	676.193	595.972	1270.87	1220.33	1337.86	17.6173	25.0005	21.336	43.3264	41.3355	45.1557	930.056	-1.12781	2.56142e-10	8.69548e-09	DOWN	PDZ binding kinase [Source:MGI Symbol;Acc:MGI:1289156]	[GO:0005524:ATP binding][GO:0006468:protein phosphorylation][GO:0004674:protein serine/threonine kinase activity][GO:0004672:protein kinase activity][GO:0000278:mitotic cell cycle][GO:0016740:transferase activity][GO:0005634:nucleus][GO:0000166:nucleotide binding][GO:0016301:kinase activity][GO:0016310:phosphorylation][GO:0001933:negative regulation of protein phosphorylation][GO:0004674:protein …	-	-
ENSMUSG00000051648	8	105382807	105413502	7101	-	Kctd19	67.1981	68.7902	65.0573	227.295	228.746	209.359	1.39435	1.43522	1.31431	4.37276	4.37232	3.98757	144.408	-1.72592	2.60965e-10	8.85191e-09	DOWN	potassium channel tetramerisation domain containing 19 [Source:MGI Symbol;Acc:MGI:3045294]	[GO:0051260:protein homooligomerization][GO:0003674:molecular_function][GO:0008150:biological_process][GO:0005575:cellular_component][GO:0051260:protein homooligomerization][GO:0003674:molecular_function][GO:0008150:biological_process][GO:0005575:cellular_component][GO:0051260:protein homooligomerization]	-	-
ENSMUSG00000007379	3	103102604	103169769	20604	+	Dennd2c	633.582	722.297	471.666	1484.63	1370.35	1316.16	8.04805	9.2253	5.83322	17.4847	16.0348	15.346	999.78	-1.18807	2.62515e-10	8.89712e-09	DOWN	DENN/MADD domain containing 2C [Source:MGI Symbol;Acc:MGI:3036254]	[GO:0017112:Rab guanyl-nucleotide exchange factor activity]	-	-
ENSMUSG00000020962	12	91555262	91590487	8611	-	Gtf2a1	613.51	557.639	437.975	1255.53	1180.97	1111.9	6.39871	5.84792	4.44741	12.1409	11.3462	10.6448	859.588	-1.13912	2.71015e-10	9.1701e-09	DOWN	general transcription factor II A, 1 [Source:MGI Symbol;Acc:MGI:1933277]	[GO:0006367:transcription initiation from RNA polymerase II promoter][GO:0005672:transcription factor TFIIA complex][GO:0005634:nucleus][GO:0005634:nucleus][GO:0005654:nucleoplasm][GO:0005829:cytosol][GO:0005515:protein binding][GO:0005737:cytoplasm][GO:0046982:protein heterodimerization activity][GO:0003677:DNA binding][GO:0008134:transcription factor binding][GO:0006366:transcription by RNA pol…	-	-
ENSMUSG00000029267	5	108065674	108109004	30532	+	Mtf2	2660.87	3511.96	2009.81	6955.04	5539.9	6851.41	41.4503	55.0085	30.4821	100.451	79.4969	97.9682	4588.17	-1.24069	2.71283e-10	9.1716e-09	DOWN	metal response element binding transcription factor 2 [Source:MGI Symbol;Acc:MGI:105050]	[GO:0046872:metal ion binding][GO:0046872:metal ion binding][GO:0046872:metal ion binding][GO:0003677:DNA binding][GO:0005634:nucleus][GO:0005634:nucleus][GO:0005654:nucleoplasm][GO:0035064:methylated histone binding][GO:0005737:cytoplasm][GO:0005925:focal adhesion][GO:0003700:DNA-binding transcription factor activity][GO:0043565:sequence-specific DNA binding][GO:0045893:positive regulation of tr…	-	-
ENSMUSG00000037910	3	48605732	48609102	593	-	1700018B24Rik	12.2178	26.3452	31.3669	132.589	179.805	118.722	1.30308	2.82523	3.25712	13.1109	17.6653	11.6227	83.5076	-2.63577	2.75689e-10	9.31289e-09	DOWN	RIKEN cDNA 1700018B24 gene [Source:MGI Symbol;Acc:MGI:1913582]	-	-	-
ENSMUSG00000022544	16	5244152	5255983	6465	-	Eef2kmt	322.9	307.36	513.488	902.866	1084.15	991.904	9.41105	9.0073	14.5709	24.3974	29.1074	26.5363	687.111	-1.38534	2.77993e-10	9.38302e-09	DOWN	eukaryotic elongation factor 2 lysine methyltransferase [Source:MGI Symbol;Acc:MGI:1917761]	[GO:0016740:transferase activity][GO:0032991:protein-containing complex][GO:0005737:cytoplasm][GO:0005737:cytoplasm][GO:0008168:methyltransferase activity][GO:0032259:methylation][GO:0016279:protein-lysine N-methyltransferase activity][GO:0016279:protein-lysine N-methyltransferase activity][GO:0018023:peptidyl-lysine trimethylation][GO:0018023:peptidyl-lysine trimethylation]	-	-
ENSMUSG00000023176	16	30256378	30267499	4550	-	Cpn2	0	0	0	54.1178	47.877	56.1696	0	0	0	0.697445	0.613041	0.716672	26.3607	-8.30621	2.98504e-10	1.00588e-08	DOWN	carboxypeptidase N, polypeptide 2 [Source:MGI Symbol;Acc:MGI:1919006]	[GO:0005515:protein binding][GO:0005615:extracellular space][GO:0003674:molecular_function][GO:0008150:biological_process][GO:0005576:extracellular region][GO:0031012:extracellular matrix][GO:0062023:collagen-containing extracellular matrix]	-	-
ENSMUSG00000060461	9	78367052	78368177	619	-	Dppa5a	6702.35	6732.66	11092.3	17535.1	21380.8	18707	684.805	691.676	1103.43	1661.11	2012.37	1754.47	13691.7	-1.23252	3.21835e-10	1.0748e-08	DOWN	developmental pluripotency associated 5A [Source:MGI Symbol;Acc:MGI:101800]	[GO:0003723:RNA binding][GO:0010468:regulation of gene expression][GO:0005737:cytoplasm][GO:0005737:cytoplasm][GO:0007275:multicellular organism development][GO:0003729:mRNA binding]	-	-
ENSMUSG00000038886	7	80349097	80371375	25748	-	Man2a2	370.026	403.959	319.478	841.532	901.152	728.928	3.57072	3.91957	3.00159	7.52914	8.01061	6.45668	594.179	-1.17463	3.46232e-10	1.15346e-08	DOWN	mannosidase 2, alpha 2 [Source:MGI Symbol;Acc:MGI:2150656]	[GO:0005975:carbohydrate metabolic process][GO:0003824:catalytic activity][GO:0004559:alpha-mannosidase activity][GO:0006013:mannose metabolic process][GO:0030246:carbohydrate binding][GO:0016020:membrane][GO:0016021:integral component of membrane][GO:0000139:Golgi membrane][GO:0005794:Golgi apparatus][GO:0046872:metal ion binding][GO:0016787:hydrolase activity][GO:0016798:hydrolase activity, act…	[mmu00510:N-Glycan biosynthesis]	-
ENSMUSG00000055809	7	4522933	4532453	2224	-	Dnaaf3	72.4343	98.7944	67.3808	276.001	251.088	259.146	2.05987	2.82491	1.8656	7.27707	6.57757	6.76458	170.807	-1.71255	3.53264e-10	1.17498e-08	DOWN	dynein, axonemal assembly factor 3 [Source:MGI Symbol;Acc:MGI:3588207]	[GO:0070286:axonemal dynein complex assembly][GO:0003674:molecular_function][GO:0005575:cellular_component][GO:0005737:cytoplasm][GO:0007507:heart development][GO:0030030:cell projection organization][GO:0007368:determination of left/right symmetry][GO:0044458:motile cilium assembly][GO:0070286:axonemal dynein complex assembly][GO:0070286:axonemal dynein complex assembly][GO:0044458:motile cilium…	-	-
ENSMUSG00000055692	16	17276077	17283229	14112	+	Tmem191c	181.522	186.612	194.01	418.511	533.031	451.91	6.67081	6.89548	6.94161	14.2596	18.0445	15.2441	327.599	-1.32044	3.72021e-10	1.23139e-08	DOWN	transmembrane protein 191C [Source:MGI Symbol;Acc:MGI:107238]	[GO:0016020:membrane][GO:0016021:integral component of membrane][GO:0003674:molecular_function][GO:0008150:biological_process][GO:0005575:cellular_component]	-	-
ENSMUSG00000029119	5	36806921	36830653	5500	-	Man2b2	559.402	723.029	642.441	1251.93	1353.32	1368.5	10.6245	13.8076	11.8797	22.0453	23.6773	23.8578	983.103	-1.04479	4.01506e-10	1.32578e-08	DOWN	mannosidase 2, alpha B2 [Source:MGI Symbol;Acc:MGI:1195262]	[GO:0005975:carbohydrate metabolic process][GO:0003824:catalytic activity][GO:0004559:alpha-mannosidase activity][GO:0006013:mannose metabolic process][GO:0030246:carbohydrate binding][GO:0005615:extracellular space][GO:0046872:metal ion binding][GO:0016787:hydrolase activity][GO:0016798:hydrolase activity, acting on glycosyl bonds][GO:0008152:metabolic process][GO:0005576:extracellular region][G…	[mmu00511:Other glycan degradation]	-
ENSMUSG00000031134	X	57383530	57393036	11103	-	Rbmx	157.086	204.907	197.495	483.453	467.067	451.91	3.19762	4.19394	3.9141	9.12417	8.75814	8.44387	326.986	-1.32632	4.08016e-10	1.34403e-08	DOWN	RNA binding motif protein, X chromosome [Source:MGI Symbol;Acc:MGI:1343044]	[GO:0005634:nucleus][GO:0003676:nucleic acid binding][GO:0005634:nucleus][GO:0003723:RNA binding][GO:0042802:identical protein binding][GO:0045944:positive regulation of transcription by RNA polymerase II][GO:0003682:chromatin binding][GO:0003723:RNA binding][GO:0048026:positive regulation of mRNA splicing, via spliceosome][GO:0005681:spliceosomal complex][GO:1990904:ribonucleoprotein complex][GO…	-	-
ENSMUSG00000022718	16	18253948	18289246	17210	-	Dgcr8	885.793	775.719	606.427	1730.87	1500.15	1717	12.9682	11.419	8.64394	23.4942	20.2313	23.0737	1202.66	-1.12384	4.09299e-10	1.34718e-08	DOWN	DGCR8, microprocessor complex subunit [Source:MGI Symbol;Acc:MGI:2151114]	[GO:0005515:protein binding][GO:0003723:RNA binding][GO:0020037:heme binding][GO:0042802:identical protein binding][GO:0031053:primary miRNA processing][GO:0070877:microprocessor complex][GO:0046872:metal ion binding][GO:0005634:nucleus][GO:0005634:nucleus][GO:0005737:cytoplasm][GO:0042802:identical protein binding][GO:0042803:protein homodimerization activity][GO:0014069:postsynaptic density][GO…	-	-
ENSMUSG00000039252	5	52533517	52566462	12729	-	Lgi2	121.306	125.871	155.673	402.276	390.464	321.699	1.18836	1.23985	1.48479	3.65377	3.52364	2.89279	252.881	-1.47401	4.15572e-10	1.36261e-08	DOWN	leucine-rich repeat LGI family, member 2 [Source:MGI Symbol;Acc:MGI:2180196]	[GO:0005515:protein binding][GO:0005615:extracellular space][GO:0003674:molecular_function][GO:0008150:biological_process][GO:0005576:extracellular region][GO:0005515:protein binding][GO:0005615:extracellular space][GO:0003674:molecular_function][GO:0008150:biological_process][GO:0005576:extracellular region]	-	-
ENSMUSG00000029823	6	38551334	38609470	34429	+	Luc7l2	1333.49	1378	806.246	3486.99	2454.5	2867.2	19.8301	20.6044	11.6732	48.0769	33.6233	39.1376	2054.4	-1.32302	4.68467e-10	1.52603e-08	DOWN	LUC7-like 2 (S. cerevisiae) [Source:MGI Symbol;Acc:MGI:2183260]	[GO:0003729:mRNA binding][GO:0006376:mRNA splice site selection][GO:0005685:U1 snRNP][GO:0003729:mRNA binding][GO:0006376:mRNA splice site selection][GO:0005685:U1 snRNP][GO:0005634:nucleus][GO:0003729:mRNA binding][GO:0016607:nuclear speck][GO:0016607:nuclear speck][GO:0005654:nucleoplasm][GO:0019899:enzyme binding][GO:0006376:mRNA splice site selection][GO:0071004:U2-type prespliceosome][GO:000…	-	-
ENSMUSG00000037578	19	44147637	44192442	6850	-	Pkd2l1	15.7086	29.2724	13.9409	116.353	150.015	109.786	0.281525	0.527489	0.243251	1.93334	2.4766	1.80603	72.5127	-2.65047	4.83715e-10	1.57072e-08	DOWN	polycystic kidney disease 2-like 1 [Source:MGI Symbol;Acc:MGI:1352448]	[GO:0016020:membrane][GO:0005509:calcium ion binding][GO:0016021:integral component of membrane][GO:0005886:plasma membrane][GO:0005515:protein binding][GO:0006811:ion transport][GO:0031410:cytoplasmic vesicle][GO:0005886:plasma membrane][GO:0005886:plasma membrane][GO:0042995:cell projection][GO:0016020:membrane][GO:0005262:calcium channel activity][GO:0005262:calcium channel activity][GO:000681…	-	-
ENSMUSG00000040414	19	43663801	43674881	8266	-	Slc25a28	572.493	496.899	712.145	1206.83	1344.81	1327.64	9.72278	8.48526	11.7754	19.0027	21.039	20.6968	943.47	-1.12512	5.06552e-10	1.6384e-08	DOWN	solute carrier family 25, member 28 [Source:MGI Symbol;Acc:MGI:2180509]	[GO:0016020:membrane][GO:0016021:integral component of membrane][GO:0006811:ion transport][GO:0005739:mitochondrion][GO:0005743:mitochondrial inner membrane][GO:0005739:mitochondrion][GO:0005739:mitochondrion][GO:0055072:iron ion homeostasis][GO:0005381:iron ion transmembrane transporter activity][GO:0048250:iron import into the mitochondrion][GO:0005743:mitochondrial inner membrane]	-	-
ENSMUSG00000024824	19	4195196	4201662	7684	-	Rad9a	600.419	571.544	738.865	1260.04	1287.36	1441.26	18.0742	17.2994	21.6549	35.1674	35.6983	39.8242	983.249	-1.06338	5.15183e-10	1.66369e-08	DOWN	RAD9 checkpoint clamp component A [Source:MGI Symbol;Acc:MGI:1328356]	[GO:0006281:DNA repair][GO:0000077:DNA damage checkpoint][GO:0030896:checkpoint clamp complex][GO:0016787:hydrolase activity][GO:0005634:nucleus][GO:0005634:nucleus][GO:0005634:nucleus][GO:0005654:nucleoplasm][GO:0005515:protein binding][GO:0005737:cytoplasm][GO:0090305:nucleic acid phosphodiester bond hydrolysis][GO:0006974:cellular response to DNA damage stimulus][GO:0004518:nuclease activity][…	-	-
ENSMUSG00000038141	17	6256860	6308314	16090	+	Tmem181a	304.573	363.71	270.685	696.316	728.795	707.226	3.39793	4.07995	2.94018	7.20246	7.48984	7.2424	511.884	-1.17972	6.02081e-10	1.93519e-08	DOWN	transmembrane protein 181A [Source:MGI Symbol;Acc:MGI:1924356]	[GO:0015643:toxic substance binding][GO:0016020:membrane][GO:0016021:integral component of membrane][GO:0005575:cellular_component][GO:0009405:pathogenesis][GO:0015643:toxic substance binding][GO:0015643:toxic substance binding][GO:0015643:toxic substance binding][GO:0016020:membrane][GO:0016021:integral component of membrane][GO:0005575:cellular_component][GO:0009405:pathogenesis][GO:0015643:tox…	-	-
ENSMUSG00000094196	X	154948543	154949505	963	-	Magea3	0	0	0	67.6473	40.4295	43.4038	0	0	0	4.11912	2.44594	2.61657	25.2468	-8.24701	6.21457e-10	1.9959e-08	DOWN	melanoma antigen, family A, 3 [Source:MGI Symbol;Acc:MGI:1333832]	[GO:0003674:molecular_function][GO:0008150:biological_process][GO:0005575:cellular_component]	-	-
ENSMUSG00000020024	10	94688654	94790853	11083	+	Cep83	645.8	802.796	594.81	1416.08	1377.79	1456.58	10.446	13.0568	9.36738	21.237	20.5296	21.6266	1048.98	-1.0545	6.22037e-10	1.9962e-08	DOWN	centrosomal protein 83 [Source:MGI Symbol;Acc:MGI:1924298]	[GO:0048278:vesicle docking][GO:0060271:cilium assembly][GO:0005814:centriole][GO:0003674:molecular_function][GO:0005794:Golgi apparatus][GO:0005737:cytoplasm][GO:0005856:cytoskeleton][GO:0071539:protein localization to centrosome][GO:0005814:centriole][GO:0005814:centriole][GO:0030030:cell projection organization][GO:0060271:cilium assembly][GO:0060271:cilium assembly][GO:0060271:cilium assembly…	-	-
ENSMUSG00000070733	5	73019987	73256619	53843	-	Fryl	874.448	845.973	398.476	2524.6	1856.56	1863.81	4.87698	4.74406	2.16374	13.0545	9.5383	9.54155	1393.98	-1.55741	6.36667e-10	2.04156e-08	DOWN	FRY like transcription coactivator [Source:MGI Symbol;Acc:MGI:1919563]	[GO:0000902:cell morphogenesis][GO:0005938:cell cortex][GO:0000902:cell morphogenesis][GO:0031175:neuron projection development][GO:0000902:cell morphogenesis][GO:0005938:cell cortex][GO:0000902:cell morphogenesis][GO:0031175:neuron projection development][GO:0000902:cell morphogenesis][GO:0005938:cell cortex][GO:0000902:cell morphogenesis][GO:0031175:neuron projection development][GO:0000902:cel…	-	-
ENSMUSG00000063728	X	154924012	154935987	2413	-	Magea6	0	0	0	52.3139	38.3016	58.7228	0	0	0	2.53102	1.84115	2.81277	24.8897	-8.22271	6.4885e-10	2.079e-08	DOWN	melanoma antigen, family A, 6 [Source:MGI Symbol;Acc:MGI:1333837]	[GO:0003674:molecular_function][GO:0008150:biological_process][GO:0005575:cellular_component][GO:0003674:molecular_function][GO:0008150:biological_process][GO:0005575:cellular_component]	-	-
ENSMUSG00000020623	11	110399122	110525522	8024	+	Map2k6	319.409	281.747	266.038	626.865	660.703	633.185	9.6749	8.58095	7.84567	17.6045	18.4353	17.6048	464.658	-1.14599	6.64437e-10	2.12729e-08	DOWN	mitogen-activated protein kinase kinase 6 [Source:MGI Symbol;Acc:MGI:1346870]	[GO:0005524:ATP binding][GO:0006468:protein phosphorylation][GO:0004672:protein kinase activity][GO:0016740:transferase activity][GO:0005634:nucleus][GO:0005634:nucleus][GO:0005829:cytosol][GO:0005515:protein binding][GO:0005737:cytoplasm][GO:0000166:nucleotide binding][GO:0042802:identical protein binding][GO:0005856:cytoskeleton][GO:0016301:kinase activity][GO:0016310:phosphorylation][GO:000471…	[mmu04010:MAPK signaling pathway][mmu04380:Osteoclast differentiation][mmu04620:Toll-like receptor signaling pathway][mmu04664:Fc epsilon RI signaling pathway][mmu04668:TNF signaling pathway][mmu04912:GnRH signaling pathway][mmu05014:Amyotrophic lateral sclerosis (ALS)][mmu05145:Toxoplasmosis][mmu05164:Influenza A][mmu05169:Epstein-Barr virus infection]	-
ENSMUSG00000035969	4	43381979	43427088	32459	+	Rusc2	431.988	360.782	219.568	956.984	883.065	891.054	5.13076	4.30856	2.53903	10.5382	9.66155	9.71438	623.907	-1.42804	7.36283e-10	2.35364e-08	DOWN	RUN and SH3 domain containing 2 [Source:MGI Symbol;Acc:MGI:2140371]	[GO:0005515:protein binding][GO:0005515:protein binding][GO:0017137:Rab GTPase binding][GO:0031410:cytoplasmic vesicle]	-	-
ENSMUSG00000078206	X	8985900	8986755	856	-	Fthl17d	38.3989	17.5634	37.1756	161.452	169.165	139.147	2.8371	1.3048	2.67424	11.0598	11.5136	9.43696	93.8171	-2.35153	7.44122e-10	2.37685e-08	DOWN	ferritin, heavy polypeptide-like 17, member D [Source:MGI Symbol;Acc:MGI:3713070]	[GO:0008199:ferric iron binding][GO:0006826:iron ion transport][GO:0006879:cellular iron ion homeostasis][GO:0046872:metal ion binding][GO:0055114:oxidation-reduction process][GO:0005737:cytoplasm][GO:0004322:ferroxidase activity][GO:0005506:iron ion binding][GO:0008198:ferrous iron binding][GO:0008199:ferric iron binding][GO:0042802:identical protein binding][GO:0006880:intracellular sequesterin…	-	-
ENSMUSG00000000838	X	68678541	68717963	35360	+	Fmr1	1265.42	1470.94	590.163	3639.42	2825.81	3389.32	18.152	21.2159	8.2423	48.4031	37.3402	44.6276	2196.85	-1.56514	7.72973e-10	2.46517e-08	DOWN	fragile X mental retardation 1 [Source:MGI Symbol;Acc:MGI:95564]	[GO:0003723:RNA binding][GO:0003676:nucleic acid binding][GO:0003729:mRNA binding][GO:0006417:regulation of translation][GO:0017148:negative regulation of translation][GO:0002151:G-quadruplex RNA binding][GO:0003730:mRNA 3'-UTR binding][GO:0008266:poly(U) RNA binding][GO:0030371:translation repressor activity][GO:0031369:translation initiation factor binding][GO:0033592:RNA strand annealing activ…	-	-
ENSMUSG00000005442	7	25267704	25294159	33302	+	Cic	2336.22	2011.75	1503.29	4412.41	3998.26	3959.96	17.973	15.5616	11.2599	31.4725	28.3348	27.9638	3036.98	-1.07943	7.89369e-10	2.51356e-08	DOWN	capicua transcriptional repressor [Source:MGI Symbol;Acc:MGI:1918972]	[GO:0003677:DNA binding][GO:0005634:nucleus][GO:0005654:nucleoplasm][GO:0032991:protein-containing complex][GO:0005634:nucleus][GO:0005515:protein binding][GO:0003682:chromatin binding][GO:0043231:intracellular membrane-bounded organelle][GO:0000122:negative regulation of transcription by RNA polymerase II][GO:0000122:negative regulation of transcription by RNA polymerase II][GO:0007420:brain dev…	-	HMG
ENSMUSG00000035183	2	125068124	125088677	3052	+	Slc24a5	17.454	10.9772	13.9409	115.451	106.393	75.3183	0.564939	0.35725	0.439321	3.46462	3.17222	2.23773	56.5892	-2.81899	7.91666e-10	2.51892e-08	DOWN	solute carrier family 24, member 5 [Source:MGI Symbol;Acc:MGI:2677271]	[GO:0016021:integral component of membrane][GO:0006811:ion transport][GO:0055085:transmembrane transport][GO:0008273:calcium, potassium:sodium antiporter activity][GO:0005802:trans-Golgi network][GO:0048021:regulation of melanin biosynthetic process][GO:0016020:membrane][GO:0005794:Golgi apparatus][GO:0071805:potassium ion transmembrane transport][GO:0006813:potassium ion transport][GO:0070588:ca…	-	-
ENSMUSG00000031381	X	164419787	164433916	21345	+	Piga	499.186	663.752	471.666	1177.06	1145.86	1248.5	8.08898	10.8147	7.44136	17.6841	17.1043	18.5703	867.67	-1.12485	8.008e-10	2.54601e-08	DOWN	phosphatidylinositol glycan anchor biosynthesis, class A [Source:MGI Symbol;Acc:MGI:99461]	[GO:0016020:membrane][GO:0016021:integral component of membrane][GO:0006506:GPI anchor biosynthetic process][GO:0006506:GPI anchor biosynthetic process][GO:0017176:phosphatidylinositol N-acetylglucosaminyltransferase activity][GO:0000506:glycosylphosphatidylinositol-N-acetylglucosaminyltransferase (GPI-GnT) complex][GO:0016020:membrane][GO:0016021:integral component of membrane][GO:0016740:transf…	[mmu00563:Glycosylphosphatidylinositol (GPI)-anchor biosynthesis]	-
ENSMUSG00000053460	6	72414308	72430712	7386	+	Ggcx	142.25	145.63	133.6	386.041	400.039	320.422	3.0716	3.16183	2.80869	7.72848	7.95714	6.35088	254.664	-1.39209	8.37824e-10	2.65346e-08	DOWN	gamma-glutamyl carboxylase [Source:MGI Symbol;Acc:MGI:1927655]	[GO:0008488:gamma-glutamyl carboxylase activity][GO:0017187:peptidyl-glutamic acid carboxylation][GO:0016020:membrane][GO:0016021:integral component of membrane][GO:0043231:intracellular membrane-bounded organelle][GO:0005783:endoplasmic reticulum][GO:0005789:endoplasmic reticulum membrane][GO:0016829:lyase activity][GO:0017187:peptidyl-glutamic acid carboxylation][GO:0019842:vitamin binding][GO:…	-	-
ENSMUSG00000097415	7	75769038	75782099	3665	-	AU020206	631.836	482.995	654.059	1356.55	1154.37	1279.13	13.2804	10.2077	13.3848	26.436	22.351	24.6788	926.491	-1.10151	8.38486e-10	2.6535e-08	DOWN	expressed sequence AU020206 [Source:MGI Symbol;Acc:MGI:2142134]	-	-	-
ENSMUSG00000065954	8	25154552	25256588	25213	-	Tacc1	838.667	620.575	559.958	1619.93	1458.65	1400.41	6.81073	5.06728	4.42737	12.1969	10.9119	10.439	1083.03	-1.14871	8.42692e-10	2.66476e-08	DOWN	transforming, acidic coiled-coil containing protein 1 [Source:MGI Symbol;Acc:MGI:2443510]	[GO:0007052:mitotic spindle organization][GO:0005634:nucleus][GO:0005737:cytoplasm][GO:0005856:cytoskeleton][GO:0000226:microtubule cytoskeleton organization][GO:0005737:cytoplasm][GO:0007049:cell cycle][GO:0051301:cell division][GO:0019904:protein domain specific binding][GO:0005815:microtubule organizing center][GO:0030496:midbody][GO:0022008:neurogenesis][GO:0000226:microtubule cytoskeleton or…	-	-
ENSMUSG00000068115	2	150934519	151039382	10975	-	Ninl	459.041	383.469	371.756	991.258	809.654	852.757	5.70044	4.7881	4.4947	11.4128	9.26189	9.72036	644.656	-1.12778	8.51612e-10	2.68883e-08	DOWN	ninein-like [Source:MGI Symbol;Acc:MGI:1925427]	[GO:0005509:calcium ion binding][GO:0046872:metal ion binding][GO:0005829:cytosol][GO:0045171:intercellular bridge][GO:0005737:cytoplasm][GO:0005856:cytoskeleton][GO:0005874:microtubule][GO:0005813:centrosome][GO:0005815:microtubule organizing center][GO:0034454:microtubule anchoring at centrosome][GO:0005829:cytosol][GO:0045171:intercellular bridge][GO:0005509:calcium ion binding]	-	-
ENSMUSG00000072295	1	58997116	59094900	4867	-	C2cd6	7.85432	5.85448	5.80869	96.5101	59.5803	62.5525	0.210935	0.15809	0.151881	2.40305	1.47396	1.542	39.6934	-3.48592	8.76134e-10	2.76201e-08	DOWN	C2 calcium dependent domain containing 6 [Source:MGI Symbol;Acc:MGI:1920713]	[GO:0003674:molecular_function][GO:0008150:biological_process][GO:0005575:cellular_component]	-	-
ENSMUSG00000079635	X	37480337	37485124	2754	+	Rhox4c	1.7454	2.92724	16.2643	93.8043	105.329	81.7012	0.0596375	0.100568	0.541061	2.97164	3.31526	2.56244	50.2953	-3.84305	9.01612e-10	2.83363e-08	DOWN	reproductive homeobox 4C [Source:MGI Symbol;Acc:MGI:3613386]	[GO:0003677:DNA binding][GO:0008150:biological_process][GO:0005575:cellular_component][GO:0005634:nucleus]	-	Homeobox
ENSMUSG00000039908	11	119355557	119381079	6416	+	Slc26a11	154.468	124.408	147.541	352.668	391.528	363.826	3.54994	2.87479	3.30126	7.51447	8.28873	7.67495	255.74	-1.38004	9.48178e-10	2.9777e-08	DOWN	solute carrier family 26, member 11 [Source:MGI Symbol;Acc:MGI:2444589]	[GO:0016021:integral component of membrane][GO:0016020:membrane][GO:0055085:transmembrane transport][GO:0008271:secondary active sulfate transmembrane transporter activity][GO:0008272:sulfate transport][GO:0015116:sulfate transmembrane transporter activity][GO:0016021:integral component of membrane][GO:0005794:Golgi apparatus][GO:0005886:plasma membrane][GO:0005886:plasma membrane][GO:0005654:nuc…	-	-
ENSMUSG00000035829	2	28446800	28455508	12816	+	Ppp1r26	85.5248	76.1083	73.1895	245.334	228.746	245.104	0.989584	0.88546	0.82451	2.6319	2.43813	2.60322	159.001	-1.61318	9.67486e-10	3.03602e-08	DOWN	protein phosphatase 1, regulatory subunit 26 [Source:MGI Symbol;Acc:MGI:2685193]	[GO:0004864:protein phosphatase inhibitor activity][GO:0010923:negative regulation of phosphatase activity][GO:0005634:nucleus][GO:0010923:negative regulation of phosphatase activity][GO:0005730:nucleolus][GO:0032515:negative regulation of phosphoprotein phosphatase activity][GO:0010923:negative regulation of phosphatase activity][GO:0010923:negative regulation of phosphatase activity][GO:0004864…	-	-
ENSMUSG00000035776	X	71420060	71492849	13164	-	Cd99l2	222.539	193.198	232.348	553.806	491.537	481.271	3.90961	3.41277	3.97422	9.02061	7.95478	7.76101	362.45	-1.2396	9.72104e-10	3.04818e-08	DOWN	CD99 antigen-like 2 [Source:MGI Symbol;Acc:MGI:2177151]	[GO:0016020:membrane][GO:0016021:integral component of membrane][GO:0005886:plasma membrane][GO:0009986:cell surface][GO:0005887:integral component of plasma membrane][GO:0030054:cell junction][GO:0007155:cell adhesion][GO:0005913:cell-cell adherens junction][GO:0005886:plasma membrane][GO:2000391:positive regulation of neutrophil extravasation][GO:0050904:diapedesis][GO:2000409:positive regulati…	-	-
ENSMUSG00000006930	11	100347327	100356128	7550	-	Hap1	292.355	196.125	226.539	601.61	606.442	554.036	5.57605	3.76119	4.20673	10.6385	10.6549	9.69962	412.851	-1.30234	1.03418e-09	3.23295e-08	DOWN	huntingtin-associated protein 1 [Source:MGI Symbol;Acc:MGI:1261831]	[GO:0005634:nucleus][GO:0048471:perinuclear region of cytoplasm][GO:0005515:protein binding][GO:0005737:cytoplasm][GO:0006914:autophagy][GO:0015031:protein transport][GO:0005737:cytoplasm][GO:0030054:cell junction][GO:0045202:synapse][GO:0031410:cytoplasmic vesicle][GO:0042802:identical protein binding][GO:0031410:cytoplasmic vesicle][GO:0005856:cytoskeleton][GO:0042995:cell projection][GO:004300…	-	-
ENSMUSG00000031333	X	104280657	104413856	6260	-	Abcb7	808.995	903.054	403.123	2003.26	1816.13	2038.7	9.02865	10.1337	4.38027	20.7284	18.6711	20.8848	1328.88	-1.467	1.14396e-09	3.55181e-08	DOWN	ATP-binding cassette, sub-family B (MDR/TAP), member 7 [Source:MGI Symbol;Acc:MGI:109533]	[GO:0016021:integral component of membrane][GO:0005524:ATP binding][GO:0055085:transmembrane transport][GO:0042626:ATPase activity, coupled to transmembrane movement of substances][GO:0016887:ATPase activity][GO:0016020:membrane][GO:0000166:nucleotide binding][GO:0005739:mitochondrion][GO:0005743:mitochondrial inner membrane][GO:0016021:integral component of membrane][GO:0005739:mitochondrion][GO…	-	-
ENSMUSG00000044734	13	32842092	32851185	3645	-	Serpinb1a	35.7808	15.368	45.3078	163.255	155.334	186.381	1.17986	0.509537	1.45459	4.99114	4.71838	5.64136	100.238	-2.41088	1.22841e-09	3.80825e-08	DOWN	serine (or cysteine) peptidase inhibitor, clade B, member 1a [Source:MGI Symbol;Acc:MGI:1913472]	[GO:0005615:extracellular space][GO:0004867:serine-type endopeptidase inhibitor activity][GO:0005615:extracellular space][GO:0005737:cytoplasm][GO:0005576:extracellular region][GO:0005576:extracellular region][GO:0005576:extracellular region][GO:0005515:protein binding][GO:0004867:serine-type endopeptidase inhibitor activity][GO:0010951:negative regulation of endopeptidase activity][GO:0006954:in…	-	-
ENSMUSG00000062949	X	60223290	60592698	23651	-	Atp11c	366.535	428.841	199.819	1195.1	805.398	965.096	3.83549	4.5121	2.03577	11.5947	7.76354	9.26993	660.132	-1.5711	1.24905e-09	3.86348e-08	DOWN	ATPase, class VI, type 11C [Source:MGI Symbol;Acc:MGI:1859661]	[GO:0016021:integral component of membrane][GO:0005524:ATP binding][GO:0000287:magnesium ion binding][GO:0000166:nucleotide binding][GO:0015914:phospholipid transport][GO:0004012:phospholipid-translocating ATPase activity][GO:0045332:phospholipid translocation][GO:0016020:membrane][GO:0016021:integral component of membrane][GO:0005524:ATP binding][GO:0000287:magnesium ion binding][GO:0000166:nucl…	-	-
ENSMUSG00000079429	1	88226986	88262289	17573	+	Mroh2a	89.8883	81.9628	81.3217	282.315	265.983	219.572	0.755386	0.692563	0.665363	2.19963	2.05904	1.69373	170.174	-1.60199	1.25645e-09	3.88053e-08	DOWN	maestro heat-like repeat family member 2A [Source:MGI Symbol;Acc:MGI:3705228]	[GO:0003674:molecular_function][GO:0008150:biological_process][GO:0005575:cellular_component]	-	-
ENSMUSG00000021185	12	100779057	100896981	16946	+	Dglucy	201.594	185.88	196.334	473.531	450.044	437.868	3.86948	3.58743	3.66907	8.42702	7.95744	7.71468	324.208	-1.22285	1.29037e-09	3.9823e-08	DOWN	D-glutamate cyclase [Source:MGI Symbol;Acc:MGI:2444813]	[GO:0005739:mitochondrion][GO:0005739:mitochondrion][GO:0005759:mitochondrial matrix][GO:0005759:mitochondrial matrix][GO:0016829:lyase activity][GO:0006536:glutamate metabolic process][GO:0047820:D-glutamate cyclase activity][GO:0047820:D-glutamate cyclase activity][GO:0047820:D-glutamate cyclase activity][GO:0006536:glutamate metabolic process][GO:0005739:mitochondrion][GO:0005739:mitochondrion…	-	-
ENSMUSG00000025266	X	150983141	151017322	12732	-	Gnl3l	2165.17	2204.21	1184.97	4646.02	4246.16	4508.89	28.1244	28.7886	14.986	55.9528	50.8078	53.7601	3159.24	-1.2696	1.35798e-09	4.18783e-08	DOWN	guanine nucleotide binding protein-like 3 (nucleolar)-like [Source:MGI Symbol;Acc:MGI:2448557]	[GO:0005525:GTP binding][GO:0005634:nucleus][GO:0005634:nucleus][GO:0005829:cytosol][GO:0000166:nucleotide binding][GO:0005730:nucleolus][GO:0032091:negative regulation of protein binding][GO:0031397:negative regulation of protein ubiquitination][GO:0005730:nucleolus][GO:0042254:ribosome biogenesis][GO:0005730:nucleolus][GO:0031647:regulation of protein stability][GO:0032211:negative regulation o…	-	-
ENSMUSG00000073177	X	56189827	56212881	1524	-	Gm773	0	0	0	42.3923	38.3016	58.7228	0	0	0	2.61389	2.34645	3.58473	23.2361	-8.12216	1.3843e-09	4.26258e-08	DOWN	predicted gene 773 [Source:MGI Symbol;Acc:MGI:2685619]	[GO:0003674:molecular_function][GO:0007283:spermatogenesis][GO:0007286:spermatid development][GO:0051321:meiotic cell cycle][GO:0000795:synaptonemal complex]	-	-
ENSMUSG00000040749	X	164070705	164076493	4298	-	Siah1b	543.694	543.735	457.725	1000.28	1087.34	1031.48	19.2856	19.3929	15.8077	32.8965	35.5294	33.5845	777.375	-1.01147	1.39383e-09	4.2887e-08	DOWN	siah E3 ubiquitin protein ligase 1B [Source:MGI Symbol;Acc:MGI:108063]	[GO:0008270:zinc ion binding][GO:0005634:nucleus][GO:0005515:protein binding][GO:0006511:ubiquitin-dependent protein catabolic process][GO:0007275:multicellular organism development][GO:0046872:metal ion binding][GO:0016567:protein ubiquitination][GO:0008270:zinc ion binding][GO:0005634:nucleus][GO:0005515:protein binding][GO:0006511:ubiquitin-dependent protein catabolic process][GO:0007275:multi…	[mmu04115:p53 signaling pathway][mmu04120:Ubiquitin mediated proteolysis][mmu04310:Wnt signaling pathway]	-
ENSMUSG00000028626	4	121039385	121055322	4168	+	Col9a2	150.105	222.47	149.864	405.884	503.241	529.781	3.24674	4.8384	3.156	8.13964	10.027	10.5184	326.891	-1.4554	1.469e-09	4.50651e-08	DOWN	collagen, type IX, alpha 2 [Source:MGI Symbol;Acc:MGI:88466]	[GO:0005594:collagen type IX trimer]	-	-
ENSMUSG00000027855	3	102818499	102936100	7899	-	Sycp1	168.432	239.302	115.012	599.806	444.724	573.185	3.09937	4.42765	2.06054	10.2332	7.5385	9.68158	356.744	-1.62218	1.49258e-09	4.56862e-08	DOWN	synaptonemal complex protein 1 [Source:MGI Symbol;Acc:MGI:105931]	[GO:0007130:synaptonemal complex assembly][GO:0000795:synaptonemal complex][GO:0003677:DNA binding][GO:0005634:nucleus][GO:0005634:nucleus][GO:0005515:protein binding][GO:0005694:chromosome][GO:0007283:spermatogenesis][GO:0000775:chromosome, centromeric region][GO:0007049:cell cycle][GO:0051301:cell division][GO:0007130:synaptonemal complex assembly][GO:0007130:synaptonemal complex assembly][GO:0…	-	-
ENSMUSG00000022304	15	39768487	39857470	6247	-	Dpys	63.7073	70.2538	181.231	389.648	428.765	481.271	1.6339	1.81169	4.52539	9.26532	10.1298	11.3299	269.146	-2.05685	1.53843e-09	4.69846e-08	DOWN	dihydropyrimidinase [Source:MGI Symbol;Acc:MGI:1928679]	[GO:0016787:hydrolase activity][GO:0005737:cytoplasm][GO:0016810:hydrolase activity, acting on carbon-nitrogen (but not peptide) bonds][GO:0046872:metal ion binding][GO:0005829:cytosol][GO:0005829:cytosol][GO:0051260:protein homooligomerization][GO:0008270:zinc ion binding][GO:0051289:protein homotetramerization][GO:0016597:amino acid binding][GO:0005829:cytosol][GO:0051260:protein homooligomeriz…	[mmu00240:Pyrimidine metabolism][mmu00410:beta-Alanine metabolism][mmu00770:Pantothenate and CoA biosynthesis][mmu00983:Drug metabolism - other enzymes]	-
ENSMUSG00000016239	X	36328353	36362341	5903	+	Lonrf3	130.033	98.7944	40.6608	392.354	335.139	367.656	2.82514	2.15823	0.860103	7.90345	6.70744	7.33212	227.439	-2.01236	1.6251e-09	4.94843e-08	DOWN	LON peptidase N-terminal domain and ring finger 3 [Source:MGI Symbol;Acc:MGI:1921615]	[GO:0005515:protein binding][GO:0046872:metal ion binding][GO:0005515:protein binding]	-	-
ENSMUSG00000070737	4	127123691	127129644	2882	+	Tmem35b	90.761	62.9357	81.3217	234.511	242.577	261.699	3.25779	2.27142	2.84195	7.80436	8.02079	8.62238	162.301	-1.65579	1.65203e-09	5.02296e-08	DOWN	transmembrane protein 35B [Source:MGI Symbol;Acc:MGI:3758095]	[GO:0016020:membrane][GO:0016021:integral component of membrane][GO:0016020:membrane][GO:0016021:integral component of membrane][GO:0003674:molecular_function][GO:0008150:biological_process][GO:0005575:cellular_component]	-	-
ENSMUSG00000051606	13	46979908	47011195	5458	+	2010001K21Rik	0	0	0	38.7845	55.3246	42.1272	0	0	0	0.712485	1.00979	0.766179	22.706	-8.09092	1.66901e-09	5.06338e-08	DOWN	RIKEN cDNA 2010001K21 gene [Source:MGI Symbol;Acc:MGI:1917079]	-	-	-
ENSMUSG00000000037	X	161082525	161258213	26231	+	Scml2	126.542	166.853	32.5287	1628.04	1292.68	1552.32	1.65117	2.18911	0.413247	19.6958	15.5379	18.5926	799.829	-3.7744	1.68922e-09	5.10957e-08	DOWN	Scm polycomb group protein like 2 [Source:MGI Symbol;Acc:MGI:1340042]	[GO:0006355:regulation of transcription, DNA-templated][GO:0005634:nucleus][GO:0006355:regulation of transcription, DNA-templated][GO:0005634:nucleus][GO:0005634:nucleus][GO:0005515:protein binding][GO:0034613:cellular protein localization][GO:0006915:apoptotic process][GO:0000790:nuclear chromatin][GO:0036353:histone H2A-K119 monoubiquitination][GO:0001741:XY body][GO:0006355:regulation of trans…	-	-
ENSMUSG00000000531	15	101224188	101232756	2033	+	Grasp	302.828	248.816	362.462	628.669	816.037	735.311	9.42081	7.783	10.9785	18.1328	23.3855	20.9973	515.687	-1.25732	1.81574e-09	5.46813e-08	DOWN	GRP1 (general receptor for phosphoinositides 1)-associated scaffold protein [Source:MGI Symbol;Acc:MGI:1860303]	[GO:0005515:protein binding][GO:0016020:membrane][GO:0005886:plasma membrane][GO:0005515:protein binding][GO:0005737:cytoplasm][GO:0005737:cytoplasm][GO:0042802:identical protein binding][GO:0005886:plasma membrane][GO:0005886:plasma membrane][GO:0005886:plasma membrane][GO:0014069:postsynaptic density][GO:0007165:signal transduction][GO:0098978:glutamatergic synapse][GO:0098978:glutamatergic syn…	-	-
ENSMUSG00000034883	12	69168814	69179009	2644	+	Lrr1	180.649	210.03	212.598	463.609	460.683	478.718	7.61685	8.90422	8.72739	18.1235	17.8931	18.5276	334.381	-1.21814	1.85038e-09	5.56427e-08	DOWN	leucine rich repeat protein 1 [Source:MGI Symbol;Acc:MGI:1916956]	[GO:0005515:protein binding][GO:0003674:molecular_function][GO:0003674:molecular_function][GO:0016853:isomerase activity]	-	-
ENSMUSG00000031290	X	147470375	147554081	20555	-	Lrch2	135.269	178.562	142.894	436.551	341.523	440.421	1.73533	2.30329	1.78477	5.1924	4.03596	5.18623	279.203	-1.41231	1.86053e-09	5.5907e-08	DOWN	leucine-rich repeats and calponin homology (CH) domain containing 2 [Source:MGI Symbol;Acc:MGI:2147870]	[GO:0005515:protein binding][GO:0005515:protein binding][GO:0005515:protein binding][GO:0005515:protein binding][GO:0003674:molecular_function]	-	-
ENSMUSG00000058755	11	4236420	4241026	3045	+	Osm	7.85432	3.65905	0	58.6277	68.0918	77.8715	0.21864	0.102416	0	1.51313	1.74606	1.98976	36.0174	-4.08305	1.86762e-09	5.60383e-08	DOWN	oncostatin M [Source:MGI Symbol;Acc:MGI:104749]	[GO:0005576:extracellular region][GO:0005125:cytokine activity][GO:0006955:immune response][GO:0005147:oncostatin-M receptor binding][GO:0038165:oncostatin-M-mediated signaling pathway][GO:0045944:positive regulation of transcription by RNA polymerase II][GO:0005125:cytokine activity][GO:0005615:extracellular space][GO:0009408:response to heat][GO:0005125:cytokine activity][GO:0005125:cytokine ac…	-	-
ENSMUSG00000031833	8	70778117	70805054	16753	-	Mast3	437.224	379.81	305.537	786.513	833.06	885.948	5.21253	4.55289	3.54646	8.69363	9.14882	9.69513	604.682	-1.15526	1.882e-09	5.63463e-08	DOWN	microtubule associated serine/threonine kinase 3 [Source:MGI Symbol;Acc:MGI:2683541]	[GO:0005515:protein binding][GO:0005524:ATP binding][GO:0005515:protein binding][GO:0000287:magnesium ion binding][GO:0006468:protein phosphorylation][GO:0004674:protein serine/threonine kinase activity][GO:0004672:protein kinase activity][GO:0016740:transferase activity][GO:0000166:nucleotide binding][GO:0035556:intracellular signal transduction][GO:0016301:kinase activity][GO:0016310:phosphoryl…	-	-
ENSMUSG00000030560	7	88278085	88310888	7845	+	Ctsc	281.01	281.015	303.214	575.453	646.872	640.844	5.51945	5.54984	5.79842	10.4794	11.7041	11.5539	454.735	-1.10718	1.91346e-09	5.72463e-08	DOWN	cathepsin C [Source:MGI Symbol;Acc:MGI:109553]	[GO:0006508:proteolysis][GO:0008234:cysteine-type peptidase activity][GO:0005615:extracellular space][GO:0016787:hydrolase activity][GO:0005654:nucleoplasm][GO:0005794:Golgi apparatus][GO:0005737:cytoplasm][GO:0008233:peptidase activity][GO:0006508:proteolysis][GO:0010033:response to organic substance][GO:0042802:identical protein binding][GO:0005783:endoplasmic reticulum][GO:0043231:intracellula…	[mmu04142:Lysosome]	-
ENSMUSG00000079629	X	37639115	37643470	1284	-	Rhox2g	13.0905	6.58629	11.6174	84.7846	71.2836	95.7436	1.04141	0.526842	0.899824	6.25361	5.22392	6.99155	47.1843	-3.02584	1.96371e-09	5.86642e-08	DOWN	reproductive homeobox 2G [Source:MGI Symbol;Acc:MGI:3648776]	[GO:0003677:DNA binding][GO:0008150:biological_process][GO:0005575:cellular_component][GO:0003677:DNA binding][GO:0008150:biological_process][GO:0005575:cellular_component][GO:0005634:nucleus]	-	Homeobox
ENSMUSG00000059327	X	100309991	99976176	39996	+	Eda	141.378	174.903	146.379	406.786	367.057	390.634	1.75152	2.17875	1.76563	4.67251	4.18901	4.44227	271.189	-1.32905	1.97189e-09	5.88659e-08	DOWN	ectodysplasin-A [Source:MGI Symbol;Acc:MGI:1195272]	[GO:0005515:protein binding][GO:0016020:membrane][GO:0006955:immune response][GO:0005164:tumor necrosis factor receptor binding][GO:0016021:integral component of membrane][GO:0005886:plasma membrane][GO:0007275:multicellular organism development][GO:0005576:extracellular region][GO:0045177:apical part of cell][GO:0005887:integral component of plasma membrane][GO:0010628:positive regulation of gen…	-	-
ENSMUSG00000056211	1	128103301	128237736	49499	+	R3hdm1	1004.48	1098.45	602.942	2325.26	2031.05	2106.36	7.5111	8.25883	4.3896	16.1207	13.9903	14.4576	1528.09	-1.25405	2.04211e-09	6.07852e-08	DOWN	R3H domain containing 1 [Source:MGI Symbol;Acc:MGI:2448514]	[GO:0003676:nucleic acid binding][GO:0008150:biological_process][GO:0005575:cellular_component][GO:0003676:nucleic acid binding][GO:0008150:biological_process][GO:0005575:cellular_component][GO:0003676:nucleic acid binding][GO:0008150:biological_process][GO:0005575:cellular_component][GO:0003676:nucleic acid binding][GO:0008150:biological_process][GO:0005575:cellular_component][GO:0008150:biologi…	-	-
ENSMUSG00000031314	X	101532734	101601789	34217	+	Taf1	1395.45	1450.45	745.836	3386.87	2621.53	3105.92	10.958	11.4524	5.70228	24.6586	18.9635	22.3877	2117.68	-1.34199	2.12162e-09	6.30605e-08	DOWN	TATA-box binding protein associated factor 1 [Source:MGI Symbol;Acc:MGI:1336878]	[GO:0003677:DNA binding][GO:0006355:regulation of transcription, DNA-templated][GO:0005515:protein binding][GO:0006352:DNA-templated transcription, initiation][GO:0005669:transcription factor TFIID complex][GO:0016740:transferase activity][GO:0005634:nucleus][GO:0005634:nucleus][GO:0005634:nucleus][GO:0005654:nucleoplasm][GO:0005515:protein binding][GO:0000166:nucleotide binding][GO:0005524:ATP b…	-	-
ENSMUSG00000038763	7	81057600	81105612	6829	+	Alpk3	523.621	420.791	328.772	1055.3	962.86	917.862	5.19967	4.20148	3.17863	9.71593	8.80777	8.36637	701.534	-1.20348	2.34599e-09	6.9679e-08	DOWN	alpha-kinase 3 [Source:MGI Symbol;Acc:MGI:2151224]	[GO:0005524:ATP binding][GO:0006468:protein phosphorylation][GO:0004674:protein serine/threonine kinase activity]	-	-
ENSMUSG00000054889	13	38151294	38198577	17887	+	Dsp	681.581	458.113	328.772	1429.61	1185.22	1266.37	4.49405	3.03718	2.11058	8.73957	7.19887	7.66447	891.612	-1.40033	2.46229e-09	7.29226e-08	DOWN	desmoplakin [Source:MGI Symbol;Acc:MGI:109611]	[GO:0005515:protein binding][GO:0005856:cytoskeleton][GO:0098609:cell-cell adhesion][GO:0030054:cell junction][GO:0050839:cell adhesion molecule binding][GO:0016020:membrane][GO:0005886:plasma membrane][GO:0005886:plasma membrane][GO:0005737:cytoplasm][GO:0005886:plasma membrane][GO:0005886:plasma membrane][GO:0016020:membrane][GO:0098609:cell-cell adhesion][GO:0098609:cell-cell adhesion][GO:0005…	-	-
ENSMUSG00000096966	X	73396439	73398736	2298	-	Gm18336	475.623	311.019	302.052	836.121	887.321	875.735	13.0901	8.60685	8.09372	21.3353	22.496	22.1235	614.645	-1.25422	2.73281e-09	8.04699e-08	DOWN	predicted gene, 18336 [Source:MGI Symbol;Acc:MGI:5010521]	-	-	-
ENSMUSG00000026603	1	189880492	189922363	4954	-	Smyd2	116.069	135.385	121.982	351.766	344.715	291.061	4.29794	5.04068	4.39771	12.0767	11.7583	9.89296	226.83	-1.40265	2.74193e-09	8.06806e-08	DOWN	SET and MYND domain containing 2 [Source:MGI Symbol;Acc:MGI:1915889]	[GO:0005515:protein binding][GO:0016740:transferase activity][GO:0046872:metal ion binding][GO:0005634:nucleus][GO:0005634:nucleus][GO:0005634:nucleus][GO:0005829:cytosol][GO:0005737:cytoplasm][GO:0005737:cytoplasm][GO:0005737:cytoplasm][GO:0005515:protein binding][GO:0018024:histone-lysine N-methyltransferase activity][GO:0034968:histone lysine methylation][GO:0008168:methyltransferase activity]…	-	-
ENSMUSG00000020261	11	55204350	55236330	9938	+	Slc36a1	260.938	121.481	152.188	552.904	536.223	534.888	3.1351	1.46757	1.78025	6.15906	5.93476	5.89899	359.77	-1.60335	2.82293e-09	8.29454e-08	DOWN	solute carrier family 36 (proton/amino acid symporter), member 1 [Source:MGI Symbol;Acc:MGI:2445299]	[GO:0016020:membrane][GO:0016021:integral component of membrane][GO:0005886:plasma membrane][GO:0005886:plasma membrane][GO:0005783:endoplasmic reticulum][GO:0015293:symporter activity][GO:0005764:lysosome][GO:0005765:lysosomal membrane][GO:1902600:proton transmembrane transport][GO:1902600:proton transmembrane transport][GO:0015078:proton transmembrane transporter activity][GO:0005764:lysosome][…	-	-
ENSMUSG00000040209	3	9427020	9610085	17302	-	Zfp704	614.382	498.363	377.565	1309.65	1120.32	1040.41	2.8088	2.29089	1.68058	5.55122	4.71812	4.36605	826.783	-1.21792	2.92929e-09	8.5825e-08	DOWN	zinc finger protein 704 [Source:MGI Symbol;Acc:MGI:2180715]	[GO:0003676:nucleic acid binding][GO:0046872:metal ion binding][GO:0003677:DNA binding][GO:0005634:nucleus][GO:0005634:nucleus][GO:0006357:regulation of transcription by RNA polymerase II][GO:0001158:enhancer sequence-specific DNA binding][GO:0003676:nucleic acid binding]	-	-
ENSMUSG00000033364	1	74435511	74544284	21156	-	Usp37	1106.59	1080.15	501.871	2490.32	2252.35	2522.53	9.84203	9.65964	4.34588	20.5355	18.4535	20.5938	1658.97	-1.43215	2.96068e-09	8.66211e-08	DOWN	ubiquitin specific peptidase 37 [Source:MGI Symbol;Acc:MGI:2442483]	[GO:0006511:ubiquitin-dependent protein catabolic process][GO:0036459:thiol-dependent ubiquitinyl hydrolase activity][GO:0016579:protein deubiquitination][GO:0016787:hydrolase activity][GO:0005634:nucleus][GO:0005634:nucleus][GO:0008233:peptidase activity][GO:0008234:cysteine-type peptidase activity][GO:0006508:proteolysis][GO:0000082:G1/S transition of mitotic cell cycle][GO:0004197:cysteine-typ…	-	-
ENSMUSG00000042364	13	113592179	113618564	8265	-	Snx18	990.517	1063.32	590.163	2245.89	1921.46	2093.59	14.0872	15.2056	8.17187	29.6143	25.1732	27.331	1484.16	-1.24162	3.05401e-09	8.92243e-08	DOWN	sorting nexin 18 [Source:MGI Symbol;Acc:MGI:2137642]	[GO:0005515:protein binding][GO:0015031:protein transport][GO:0035091:phosphatidylinositol binding][GO:0000278:mitotic cell cycle][GO:0016020:membrane][GO:0030659:cytoplasmic vesicle membrane][GO:0031410:cytoplasmic vesicle][GO:0005546:phosphatidylinositol-4,5-bisphosphate binding][GO:0000281:mitotic cytokinesis][GO:0006897:endocytosis][GO:0016197:endosomal transport][GO:0036089:cleavage furrow f…	-	-
ENSMUSG00000031461	8	15057653	15133541	10699	+	Myom2	10.4724	14.6362	5.80869	79.3728	106.393	72.7652	0.130509	0.1834	0.0704788	0.9171	1.22138	0.832373	48.2414	-3.02848	3.13063e-09	9.13331e-08	DOWN	myomesin 2 [Source:MGI Symbol;Acc:MGI:1328358]	[GO:0005515:protein binding][GO:0051015:actin filament binding][GO:0030018:Z disc][GO:0019900:kinase binding][GO:0051371:muscle alpha-actinin binding][GO:0008307:structural constituent of muscle][GO:0006936:muscle contraction][GO:0030240:skeletal muscle thin filament assembly][GO:0030241:skeletal muscle myosin thick filament assembly][GO:0045214:sarcomere organization][GO:0048739:cardiac muscle f…	-	-
ENSMUSG00000038648	6	37327255	37442146	7730	-	Creb3l2	283.628	299.31	197.495	662.944	618.145	593.61	2.53293	2.68765	1.71719	5.4891	5.08521	4.86605	442.522	-1.25989	3.37799e-09	9.82703e-08	DOWN	cAMP responsive element binding protein 3-like 2 [Source:MGI Symbol;Acc:MGI:2442695]	[GO:0006355:regulation of transcription, DNA-templated][GO:0003700:DNA-binding transcription factor activity][GO:0045944:positive regulation of transcription by RNA polymerase II][GO:0035497:cAMP response element binding][GO:0030968:endoplasmic reticulum unfolded protein response][GO:0016020:membrane][GO:0016021:integral component of membrane][GO:0003677:DNA binding][GO:0005634:nucleus][GO:000563…	-	TF_bZIP
ENSMUSG00000100131	1	24611535	24612410	876	-	Gm28439	38.3989	46.8359	23.2348	173.177	127.672	197.87	2.77233	3.40002	1.63324	11.5922	8.49113	13.1131	101.198	-2.18258	3.44978e-09	1.00217e-07	DOWN	predicted gene 28439 [Source:MGI Symbol;Acc:MGI:5579145]	-	-	-
ENSMUSG00000095872	X	147765991	147833456	3377	+	Gm15128	0	0	0	36.9805	36.1737	54.893	0	0	0	1.06979	1.03971	1.57215	21.3412	-7.99901	3.48594e-09	1.01196e-07	DOWN	predicted gene 15128 [Source:MGI Symbol;Acc:MGI:3712219]	[GO:0003674:molecular_function][GO:0008150:biological_process][GO:0005575:cellular_component][GO:0003674:molecular_function][GO:0008150:biological_process][GO:0005575:cellular_component]	-	-
ENSMUSG00000022231	15	32244810	32696341	35707	+	Sema5a	157.086	135.385	77.8364	467.217	325.564	394.464	0.919143	0.796511	0.443419	2.53463	1.75479	2.11862	259.592	-1.67392	3.66611e-09	1.06051e-07	DOWN	sema domain, seven thrombospondin repeats (type 1 and type 1-like), transmembrane domain (TM) and short cytoplasmic domain, (semaphorin) 5A [Source:MGI Symbol;Acc:MGI:107556]	[GO:0005515:protein binding][GO:0016020:membrane][GO:0016021:integral component of membrane][GO:0030215:semaphorin receptor binding]	-	-
ENSMUSG00000035545	7	4137039	4148177	18600	+	Leng8	1309.05	903.786	920.097	2203.5	2099.14	2167.64	14.7869	10.2651	10.119	23.0772	21.8426	22.4754	1600.54	-1.04604	3.78589e-09	1.09209e-07	DOWN	leukocyte receptor cluster (LRC) member 8 [Source:MGI Symbol;Acc:MGI:2142195]	[GO:0008150:biological_process][GO:0005634:nucleus][GO:0008150:biological_process][GO:0005634:nucleus]	-	-
ENSMUSG00000006641	5	31036036	31048924	14862	-	Slc5a6	263.556	205.639	204.466	519.531	506.432	531.058	4.85121	3.80591	3.66424	8.86623	8.58702	8.97263	371.78	-1.20767	3.98029e-09	1.14519e-07	DOWN	solute carrier family 5 (sodium-dependent vitamin transporter), member 6 [Source:MGI Symbol;Acc:MGI:2660847]	[GO:0016020:membrane][GO:0022857:transmembrane transporter activity][GO:0055085:transmembrane transport][GO:0016021:integral component of membrane][GO:0006811:ion transport][GO:0006814:sodium ion transport][GO:0015293:symporter activity][GO:0031526:brush border membrane][GO:0012506:vesicle membrane][GO:0015878:biotin transport][GO:0015887:pantothenate transmembrane transport][GO:0008523:sodium-de…	-	-
ENSMUSG00000030924	7	119794006	119848943	13180	+	Rexo5	133.523	215.152	145.217	494.276	452.172	402.123	3.38875	5.49041	3.58828	11.6306	10.5713	9.36789	307.077	-1.44512	4.0209e-09	1.15501e-07	DOWN	RNA exonuclease 5 [Source:MGI Symbol;Acc:MGI:1919402]	[GO:0003676:nucleic acid binding][GO:0005634:nucleus][GO:0090305:nucleic acid phosphodiester bond hydrolysis][GO:0005730:nucleolus][GO:0004527:exonuclease activity][GO:0003676:nucleic acid binding][GO:0003723:RNA binding][GO:0005634:nucleus][GO:0090305:nucleic acid phosphodiester bond hydrolysis][GO:0005730:nucleolus][GO:0004527:exonuclease activity][GO:0005634:nucleus][GO:0090305:nucleic acid ph…	[mmu03008:Ribosome biogenesis in eukaryotes]	-
ENSMUSG00000107488	6	50909770	50910735	966	+	Gm31579	0	0	0	40.5884	34.0459	49.7867	0	0	0	2.4638	2.05334	2.99204	20.7368	-7.95878	4.39191e-09	1.25631e-07	DOWN	predicted gene, 31579 [Source:MGI Symbol;Acc:MGI:5590738]	-	-	-
ENSMUSG00000027531	3	10311956	10331439	9290	-	Impa1	379.626	385.664	396.153	816.277	734.114	774.885	5.73707	5.86031	5.82886	11.4373	10.2198	10.7491	581.12	-1.00216	4.47046e-09	1.277e-07	DOWN	inositol (myo)-1(or 4)-monophosphatase 1 [Source:MGI Symbol;Acc:MGI:1933158]	[GO:0046854:phosphatidylinositol phosphorylation][GO:0046855:inositol phosphate dephosphorylation][GO:0008934:inositol monophosphate 1-phosphatase activity][GO:0046872:metal ion binding][GO:0016787:hydrolase activity][GO:0052832:inositol monophosphate 3-phosphatase activity][GO:0052833:inositol monophosphate 4-phosphatase activity][GO:0052834:inositol monophosphate phosphatase activity][GO:000602…	[mmu00562:Inositol phosphate metabolism][mmu04070:Phosphatidylinositol signaling system]	-
ENSMUSG00000087368	X	136741824	136803364	6936	+	BC065397	20.9449	35.8587	41.8226	138.902	146.823	153.19	0.41383	0.712387	0.804529	2.54451	2.67228	2.77827	89.5902	-2.16148	4.67708e-09	1.33417e-07	DOWN	cDNA sequence BC065397 [Source:MGI Symbol;Acc:MGI:3584520]	-	-	-
ENSMUSG00000051234	9	96470937	96478675	1891	-	Rnf7	1037.64	1128.45	1541.63	2543.54	2443.86	2549.33	53.2681	58.2477	77.0522	121.062	115.568	120.129	1874.07	-1.02485	5.04481e-09	1.43508e-07	DOWN	ring finger protein 7 [Source:MGI Symbol;Acc:MGI:1337096]	[GO:0008270:zinc ion binding][GO:0046872:metal ion binding][GO:0005634:nucleus][GO:0005634:nucleus][GO:0005654:nucleoplasm][GO:0005829:cytosol][GO:0005634:nucleus][GO:0005515:protein binding][GO:0005737:cytoplasm][GO:0005737:cytoplasm][GO:0006511:ubiquitin-dependent protein catabolic process][GO:0016567:protein ubiquitination][GO:0031146:SCF-dependent proteasomal ubiquitin-dependent protein catab…	-	-
ENSMUSG00000029471	5	122731170	122779409	21318	-	Camkk2	246.102	237.107	226.539	488.864	528.775	532.335	3.20199	3.10188	2.86968	5.89717	6.33752	6.35755	376.62	-1.12542	5.14167e-09	1.45759e-07	DOWN	calcium/calmodulin-dependent protein kinase kinase 2, beta [Source:MGI Symbol;Acc:MGI:2444812]	[GO:0005524:ATP binding][GO:0006468:protein phosphorylation][GO:0004672:protein kinase activity][GO:0016740:transferase activity][GO:0005634:nucleus][GO:0005829:cytosol][GO:0005737:cytoplasm][GO:0000166:nucleotide binding][GO:0042995:cell projection][GO:0016301:kinase activity][GO:0016310:phosphorylation][GO:0004674:protein serine/threonine kinase activity][GO:0005516:calmodulin binding][GO:00019…	[mmu04920:Adipocytokine signaling pathway][mmu05034:Alcoholism]	-
ENSMUSG00000040693	1	96816270	96872171	4908	-	Slco4c1	49.744	27.8088	10.4556	174.079	143.631	209.359	0.641012	0.360317	0.131179	2.07981	1.70497	2.47639	102.513	-2.56325	5.246e-09	1.48409e-07	DOWN	solute carrier organic anion transporter family, member 4C1 [Source:MGI Symbol;Acc:MGI:2442784]	[GO:0005515:protein binding][GO:0016020:membrane][GO:0055085:transmembrane transport][GO:0005215:transporter activity][GO:0016021:integral component of membrane][GO:0005886:plasma membrane][GO:0015347:sodium-independent organic anion transmembrane transporter activity][GO:0006811:ion transport][GO:0043252:sodium-independent organic anion transport][GO:0005887:integral component of plasma membrane…	-	-
ENSMUSG00000031352	X	169250193	169320372	8103	-	Hccs	411.043	479.336	393.829	881.219	858.595	850.203	7.85397	9.20913	7.3265	15.6112	15.1124	14.9116	645.704	-1.01023	5.41736e-09	1.52941e-07	DOWN	holocytochrome c synthetase [Source:MGI Symbol;Acc:MGI:106911]	[GO:0004408:holocytochrome-c synthase activity][GO:0005739:mitochondrion][GO:0016020:membrane][GO:0046872:metal ion binding][GO:0005743:mitochondrial inner membrane][GO:0005739:mitochondrion][GO:0005739:mitochondrion][GO:0016829:lyase activity][GO:0005739:mitochondrion][GO:0005515:protein binding][GO:0004408:holocytochrome-c synthase activity][GO:0018063:cytochrome c-heme linkage][GO:0004408:holo…	[mmu00860:Porphyrin and chlorophyll metabolism]	-
ENSMUSG00000069114	3	9250602	9285333	7414	+	Zbtb10	665.872	611.793	319.478	1536.04	1320.34	1321.26	5.68026	5.24758	2.65341	12.1488	10.3755	10.3459	962.465	-1.38447	5.75017e-09	1.61781e-07	DOWN	zinc finger and BTB domain containing 10 [Source:MGI Symbol;Acc:MGI:2139883]	[GO:0005515:protein binding][GO:0003676:nucleic acid binding][GO:0005654:nucleoplasm][GO:0000977:RNA polymerase II regulatory region sequence-specific DNA binding][GO:0003677:DNA binding][GO:0000122:negative regulation of transcription by RNA polymerase II][GO:0005654:nucleoplasm]	-	ZBTB
ENSMUSG00000031209	X	96455359	96574485	18503	+	Heph	8.72702	35.8587	18.5878	151.53	125.544	132.764	0.116371	0.480782	0.241319	1.87338	1.54212	1.62502	78.8354	-2.6802	5.95791e-09	1.67282e-07	DOWN	hephaestin [Source:MGI Symbol;Acc:MGI:1332240]	[GO:0005886:plasma membrane][GO:0055114:oxidation-reduction process][GO:0016491:oxidoreductase activity][GO:0005507:copper ion binding][GO:0006826:iron ion transport][GO:0006879:cellular iron ion homeostasis][GO:0016020:membrane][GO:0016021:integral component of membrane][GO:0046872:metal ion binding][GO:0005507:copper ion binding][GO:0048471:perinuclear region of cytoplasm][GO:0006811:ion transp…	-	-
ENSMUSG00000026463	1	133699457	133801041	37284	-	Atp2b4	609.146	424.45	181.231	1471.1	1209.69	1387.64	3.28578	2.30208	0.95178	7.35717	6.01085	6.87062	880.545	-1.74078	6.27576e-09	1.75965e-07	DOWN	ATPase, Ca++ transporting, plasma membrane 4 [Source:MGI Symbol;Acc:MGI:88111]	[GO:0016021:integral component of membrane][GO:0005524:ATP binding][GO:0016020:membrane][GO:0070588:calcium ion transmembrane transport][GO:0000166:nucleotide binding][GO:0005388:calcium-transporting ATPase activity][GO:1903243:negative regulation of cardiac muscle hypertrophy in response to stress][GO:0046872:metal ion binding][GO:0005886:plasma membrane][GO:0006811:ion transport][GO:0005886:pla…	[mmu04020:Calcium signaling pathway][mmu04970:Salivary secretion][mmu04972:Pancreatic secretion]	-
ENSMUSG00000052776	5	120896256	120907521	1885	-	Oas1a	32.29	51.9585	133.6	388.746	322.372	322.975	1.08339	1.75288	4.36427	12.093	9.96368	9.94692	208.657	-2.26381	6.42811e-09	1.79991e-07	DOWN	2'-5' oligoadenylate synthetase 1A [Source:MGI Symbol;Acc:MGI:2180860]	[GO:0005524:ATP binding][GO:0003723:RNA binding][GO:0006955:immune response][GO:0016740:transferase activity][GO:0016779:nucleotidyltransferase activity][GO:0003725:double-stranded RNA binding][GO:0051607:defense response to virus][GO:0046872:metal ion binding][GO:0005634:nucleus][GO:0005634:nucleus][GO:0005654:nucleoplasm][GO:0005829:cytosol][GO:0005829:cytosol][GO:0005634:nucleus][GO:0005515:pr…	-	-
ENSMUSG00000029470	5	122707544	122729738	13135	+	P2rx4	342.972	382.737	346.198	708.042	814.973	691.907	5.56905	6.24884	5.4731	10.6594	12.1902	10.3127	547.805	-1.04619	6.68107e-09	1.86566e-07	DOWN	purinergic receptor P2X, ligand-gated ion channel 4 [Source:MGI Symbol;Acc:MGI:1338859]	[GO:0005524:ATP binding][GO:0016020:membrane][GO:0006811:ion transport][GO:0005887:integral component of plasma membrane][GO:0005216:ion channel activity][GO:0001614:purinergic nucleotide receptor activity][GO:0004931:extracellularly ATP-gated cation channel activity][GO:0033198:response to ATP][GO:0098655:cation transmembrane transport][GO:0016021:integral component of membrane][GO:0060079:excit…	-	-
ENSMUSG00000070732	1	91145089	91170795	7707	+	Rbm44	400.57	435.427	333.419	877.611	762.84	818.289	6.57863	7.19033	5.3313	13.3632	11.5408	12.3357	604.693	-1.06958	6.69592e-09	1.86854e-07	DOWN	RNA binding motif protein 44 [Source:MGI Symbol;Acc:MGI:2685663]	[GO:0003676:nucleic acid binding][GO:0008150:biological_process][GO:0003723:RNA binding][GO:0005737:cytoplasm][GO:0005737:cytoplasm][GO:0005515:protein binding][GO:0042803:protein homodimerization activity][GO:0045171:intercellular bridge]	-	-
ENSMUSG00000112523	10	106183021	106183891	871	+	Gm48377	1.7454	2.92724	0	44.1962	63.836	45.9569	0.126738	0.213721	0	2.97542	4.26994	3.06312	26.4436	-4.90618	6.76198e-09	1.88441e-07	DOWN	predicted gene, 48377 [Source:MGI Symbol;Acc:MGI:6097854]	-	-	-
ENSMUSG00000054263	15	7090614	7197489	27290	+	Lifr	403.188	371.76	269.523	834.317	720.283	806.8	2.64111	2.44859	1.71894	5.0671	4.34635	4.85114	567.645	-1.1736	6.91541e-09	1.92195e-07	DOWN	LIF receptor alpha [Source:MGI Symbol;Acc:MGI:96788]	[GO:0005515:protein binding][GO:0005515:protein binding][GO:0016020:membrane][GO:0004896:cytokine receptor activity][GO:0005615:extracellular space][GO:0016021:integral component of membrane][GO:0009897:external side of plasma membrane][GO:0005886:plasma membrane][GO:0005515:protein binding][GO:0005576:extracellular region][GO:0008284:positive regulation of cell population proliferation][GO:00488…	-	-
ENSMUSG00000079536	X	74480287	74481399	627	-	Gm6880	35.7808	30.736	49.9547	127.177	197.892	159.573	3.60921	3.11736	4.90598	11.8938	18.388	14.7748	100.185	-2.06951	6.96751e-09	1.93512e-07	DOWN	predicted gene 6880 [Source:MGI Symbol;Acc:MGI:3644285]	[GO:0003674:molecular_function][GO:0008150:biological_process][GO:0005575:cellular_component]	-	-
ENSMUSG00000042359	2	76406508	76600647	25515	+	Osbpl6	219.048	238.57	250.935	521.335	512.816	504.25	1.67783	1.83739	1.87136	3.70233	3.61837	3.54531	374.492	-1.11988	6.991e-09	1.94033e-07	DOWN	oxysterol binding protein-like 6 [Source:MGI Symbol;Acc:MGI:2139014]	[GO:0016020:membrane][GO:0005886:plasma membrane][GO:0008150:biological_process][GO:0005634:nucleus][GO:0005829:cytosol][GO:0005829:cytosol][GO:0005737:cytoplasm][GO:0005886:plasma membrane][GO:0005886:plasma membrane][GO:0043231:intracellular membrane-bounded organelle][GO:0008289:lipid binding][GO:0016020:membrane][GO:0031965:nuclear membrane][GO:0005783:endoplasmic reticulum][GO:0005789:endopl…	-	-
ENSMUSG00000039463	2	167421712	167477000	32306	+	Slc9a8	325.518	324.924	279.979	688.198	667.086	605.1	4.24311	4.25861	3.55321	8.31713	8.01005	7.23997	481.801	-1.07383	7.11056e-09	1.97085e-07	DOWN	solute carrier family 9 (sodium/hydrogen exchanger), member 8 [Source:MGI Symbol;Acc:MGI:1924281]	[GO:0016021:integral component of membrane][GO:0055085:transmembrane transport][GO:0006814:sodium ion transport][GO:0015385:sodium:proton antiporter activity][GO:0006885:regulation of pH][GO:0006812:cation transport][GO:0015299:solute:proton antiporter activity][GO:0016020:membrane][GO:0000139:Golgi membrane][GO:0005794:Golgi apparatus][GO:0006811:ion transport][GO:0005794:Golgi apparatus][GO:009…	-	-
ENSMUSG00000057933	9	78331018	78355788	2727	-	Gsta2	0	4.39086	0	53.2159	47.877	67.6588	0	0.32095	0	3.58676	3.20613	4.51477	28.8571	-5.07237	7.30678e-09	2.02251e-07	DOWN	glutathione S-transferase, alpha 2 (Yc2) [Source:MGI Symbol;Acc:MGI:95863]	[GO:0005515:protein binding][GO:0004364:glutathione transferase activity][GO:0016740:transferase activity][GO:0005829:cytosol][GO:0005829:cytosol][GO:0004364:glutathione transferase activity][GO:0009617:response to bacterium][GO:0004364:glutathione transferase activity][GO:0004364:glutathione transferase activity][GO:0006805:xenobiotic metabolic process][GO:0043295:glutathione binding][GO:0006749…	[mmu00480:Glutathione metabolism][mmu00980:Metabolism of xenobiotics by cytochrome P450][mmu00982:Drug metabolism - cytochrome P450][mmu05204:Chemical carcinogenesis]	-
ENSMUSG00000026643	2	3284212	3328877	10749	+	Nmt2	1467.89	1581.44	1010.71	2792.48	2700.26	2900.39	20.8109	22.5438	13.9512	36.7061	35.2653	37.7447	2075.53	-1.04621	7.4769e-09	2.0682e-07	DOWN	N-myristoyltransferase 2 [Source:MGI Symbol;Acc:MGI:1202298]	[GO:0004379:glycylpeptide N-tetradecanoyltransferase activity][GO:0006499:N-terminal protein myristoylation][GO:0016020:membrane][GO:0016740:transferase activity][GO:0005794:Golgi apparatus][GO:0005829:cytosol][GO:0005737:cytoplasm][GO:0005737:cytoplasm][GO:0005737:cytoplasm][GO:0005886:plasma membrane][GO:0005737:cytoplasm][GO:0016746:transferase activity, transferring acyl groups][GO:0004379:gl…	-	-
ENSMUSG00000042772	1	152836995	152902646	17258	-	Smg7	1599.66	1586.56	791.144	3672.8	2980.08	3312.73	17.4675	17.4195	8.41092	37.1834	29.976	33.2038	2323.83	-1.32384	7.50341e-09	2.07414e-07	DOWN	Smg-7 homolog, nonsense mediated mRNA decay factor (C. elegans) [Source:MGI Symbol;Acc:MGI:2682334]	[GO:0005515:protein binding][GO:0005634:nucleus][GO:0005634:nucleus][GO:0005829:cytosol][GO:0005737:cytoplasm][GO:0005737:cytoplasm][GO:0005737:cytoplasm][GO:0032210:regulation of telomere maintenance via telomerase][GO:0005737:cytoplasm][GO:0045111:intermediate filament cytoskeleton][GO:0051721:protein phosphatase 2A binding][GO:0042162:telomeric DNA binding][GO:0000184:nuclear-transcribed mRNA …	-	-
ENSMUSG00000034055	X	102513975	102644246	39120	-	Phka1	466.023	433.232	296.243	1005.69	840.508	889.777	4.81993	4.50537	2.9831	9.6438	8.00791	8.44726	655.245	-1.19154	8.09396e-09	2.23138e-07	DOWN	phosphorylase kinase alpha 1 [Source:MGI Symbol;Acc:MGI:97576]	[GO:0003824:catalytic activity][GO:0005516:calmodulin binding][GO:0005977:glycogen metabolic process][GO:0016020:membrane][GO:0005886:plasma membrane][GO:0005975:carbohydrate metabolic process][GO:0046777:protein autophosphorylation][GO:0004689:phosphorylase kinase activity][GO:0005964:phosphorylase kinase complex][GO:0004689:phosphorylase kinase activity][GO:0005964:phosphorylase kinase complex]…	-	-
ENSMUSG00000055296	4	56866923	56947437	26423	-	Tmem245	1082.15	1014.29	487.93	3312.01	1950.19	2197	4.28266	4.03612	1.88005	12.1526	7.10963	7.98098	1673.93	-1.52787	8.31388e-09	2.2874e-07	DOWN	transmembrane protein 245 [Source:MGI Symbol;Acc:MGI:2445107]	[GO:0016020:membrane][GO:0016021:integral component of membrane][GO:0016020:membrane][GO:0016021:integral component of membrane][GO:0016020:membrane][GO:0016021:integral component of membrane]	-	-
ENSMUSG00000028528	4	101496648	101642799	27800	+	Dnajc6	195.485	247.352	66.2191	731.493	576.652	637.014	2.32311	2.95561	0.766169	8.05964	6.31267	6.94872	409.036	-1.92606	8.42285e-09	2.31428e-07	DOWN	DnaJ heat shock protein family (Hsp40) member C6 [Source:MGI Symbol;Acc:MGI:1919935]	[GO:0016787:hydrolase activity][GO:0004721:phosphoprotein phosphatase activity][GO:0004725:protein tyrosine phosphatase activity][GO:0035335:peptidyl-tyrosine dephosphorylation][GO:0043231:intracellular membrane-bounded organelle][GO:0014069:postsynaptic density][GO:0006898:receptor-mediated endocytosis][GO:0005737:cytoplasm][GO:0006470:protein dephosphorylation][GO:0098793:presynapse][GO:0045202…	-	-
ENSMUSG00000021109	12	73901375	73947530	12045	+	Hif1a	856.994	883.295	446.107	1818.36	1651.23	2001.68	11.4735	11.8906	5.81495	22.571	20.3643	24.5989	1276.28	-1.32074	9.00483e-09	2.4643e-07	DOWN	hypoxia inducible factor 1, alpha subunit [Source:MGI Symbol;Acc:MGI:106918]	[GO:0006355:regulation of transcription, DNA-templated][GO:0005634:nucleus][GO:0005515:protein binding][GO:0003700:DNA-binding transcription factor activity][GO:0046983:protein dimerization activity][GO:0006355:regulation of transcription, DNA-templated][GO:0046983:protein dimerization activity][GO:0005634:nucleus][GO:0006355:regulation of transcription, DNA-templated][GO:0005634:nucleus][GO:0005…	-	Others
ENSMUSG00000051998	1	133679091	133690108	2937	-	Lax1	4.36351	13.1726	1.16174	84.7846	79.795	71.4886	0.11952	0.362789	0.0309814	2.15315	2.01338	1.79739	42.461	-3.57864	9.20147e-09	2.51476e-07	DOWN	lymphocyte transmembrane adaptor 1 [Source:MGI Symbol;Acc:MGI:2443362]	[GO:0006955:immune response][GO:0051249:regulation of lymphocyte activation][GO:0016020:membrane][GO:0016021:integral component of membrane][GO:0005886:plasma membrane][GO:0005794:Golgi apparatus][GO:0005829:cytosol][GO:0005886:plasma membrane][GO:0016021:integral component of membrane][GO:0002376:immune system process][GO:0035556:intracellular signal transduction][GO:0000188:inactivation of MAPK…	-	-
ENSMUSG00000010607	9	22156846	22158358	1371	+	Pigyl	319.409	224.666	428.681	747.728	887.321	817.012	29.0665	20.557	37.981	63.087	74.3823	68.2456	570.803	-1.3387	9.30419e-09	2.53777e-07	DOWN	phosphatidylinositol glycan anchor biosynthesis, class Y-like [Source:MGI Symbol;Acc:MGI:1913518]	[GO:0006506:GPI anchor biosynthetic process][GO:0000506:glycosylphosphatidylinositol-N-acetylglucosaminyltransferase (GPI-GnT) complex][GO:0016020:membrane][GO:0016021:integral component of membrane][GO:0005783:endoplasmic reticulum][GO:0005789:endoplasmic reticulum membrane][GO:0005789:endoplasmic reticulum membrane][GO:0006506:GPI anchor biosynthetic process][GO:0017176:phosphatidylinositol N-a…	-	-
ENSMUSG00000036875	10	62947026	62974185	16379	+	Dna2	678.962	592.035	404.285	1330.4	1125.64	1350.62	10.4176	9.13368	6.03943	18.9258	15.9099	19.022	913.657	-1.18162	9.66347e-09	2.63227e-07	DOWN	DNA replication helicase/nuclease 2 [Source:MGI Symbol;Acc:MGI:2443732]	[GO:0017108:5'-flap endonuclease activity][GO:0043142:single-stranded DNA-dependent ATPase activity][GO:0033567:DNA replication, Okazaki fragment processing][GO:0046872:metal ion binding][GO:0016787:hydrolase activity][GO:0003677:DNA binding][GO:0003677:DNA binding][GO:0005634:nucleus][GO:0003824:catalytic activity][GO:0008152:metabolic process][GO:0005634:nucleus][GO:0005634:nucleus][GO:0000166:…	[mmu03030:DNA replication]	-
ENSMUSG00000024084	17	79051906	79090378	4396	+	Qpct	103.852	100.99	31.3669	303.06	315.988	352.337	3.18997	3.11909	0.938063	8.63084	8.94105	9.93418	201.266	-2.02602	1.009e-08	2.74324e-07	DOWN	glutaminyl-peptide cyclotransferase (glutaminyl cyclase) [Source:MGI Symbol;Acc:MGI:1917786]	[GO:0016603:glutaminyl-peptide cyclotransferase activity][GO:0008270:zinc ion binding][GO:0017186:peptidyl-pyroglutamic acid biosynthetic process, using glutaminyl-peptide cyclotransferase][GO:0016603:glutaminyl-peptide cyclotransferase activity]	-	-
ENSMUSG00000031441	8	12757014	12868728	30562	+	Atp11a	485.222	449.332	233.509	1225.77	908.599	1018.71	4.0652	3.78516	1.90472	9.52138	7.01224	7.83417	720.191	-1.4293	1.02005e-08	2.76754e-07	DOWN	ATPase, class VI, type 11A [Source:MGI Symbol;Acc:MGI:1354735]	[GO:0016021:integral component of membrane][GO:0005524:ATP binding][GO:0000287:magnesium ion binding][GO:0000166:nucleotide binding][GO:0015914:phospholipid transport][GO:0004012:phospholipid-translocating ATPase activity][GO:0016020:membrane][GO:0045332:phospholipid translocation][GO:0016021:integral component of membrane][GO:0005524:ATP binding][GO:0000287:magnesium ion binding][GO:0000166:nucl…	-	-
ENSMUSG00000081133	X	37940816	37945602	451	-	Rhox11-ps2	0	0	0	37.8825	37.2377	38.2975	0	0	0	4.92541	4.81039	4.92974	18.9029	-7.82667	1.0336e-08	2.80244e-07	DOWN	reproductive homeobox 11, pseudogene 2 [Source:MGI Symbol;Acc:MGI:3705790]	-	-	-
ENSMUSG00000031101	X	48146436	48161565	2677	+	Sash3	4.36351	0	0	57.7257	58.5164	45.9569	0.10309	0	0	1.26445	1.27351	0.996629	27.7604	-5.18802	1.0704e-08	2.89649e-07	DOWN	SAM and SH3 domain containing 3 [Source:MGI Symbol;Acc:MGI:1921381]	[GO:0005515:protein binding][GO:0048873:homeostasis of number of cells within a tissue][GO:0005634:nucleus][GO:0005634:nucleus][GO:0005737:cytoplasm][GO:0005737:cytoplasm][GO:0030890:positive regulation of B cell proliferation][GO:0032760:positive regulation of tumor necrosis factor production][GO:0032729:positive regulation of interferon-gamma production][GO:0032743:positive regulation of interl…	-	-
ENSMUSG00000079639	X	37265338	37270132	2794	+	Rhox4a	0	0	0	33.3727	40.4295	39.574	0	0	0	1.04704	1.26027	1.22923	18.896	-7.82521	1.0751e-08	2.90731e-07	DOWN	reproductive homeobox 4A [Source:MGI Symbol;Acc:MGI:3580240]	[GO:0003677:DNA binding][GO:0003674:molecular_function][GO:0008150:biological_process][GO:0005575:cellular_component][GO:0005634:nucleus]	-	Homeobox
ENSMUSG00000026447	1	133045667	133108687	14248	+	Pik3c2b	186.758	150.021	106.88	508.708	398.975	353.613	1.48986	1.20336	0.830135	3.76258	2.93195	2.58938	284.159	-1.50397	1.09422e-08	2.95123e-07	DOWN	phosphatidylinositol-4-phosphate 3-kinase catalytic subunit type 2 beta [Source:MGI Symbol;Acc:MGI:2685045]	[GO:0046854:phosphatidylinositol phosphorylation][GO:0048015:phosphatidylinositol-mediated signaling][GO:0005654:nucleoplasm][GO:0005829:cytosol][GO:0005515:protein binding][GO:0005886:plasma membrane][GO:0016020:membrane][GO:0005737:cytoplasm][GO:0046854:phosphatidylinositol phosphorylation][GO:0005942:phosphatidylinositol 3-kinase complex][GO:0030139:endocytic vesicle][GO:0016477:cell migration…	[mmu00562:Inositol phosphate metabolism][mmu04070:Phosphatidylinositol signaling system]	-
ENSMUSG00000029862	6	42286685	42315756	25337	+	Clcn1	15.7086	7.3181	18.5878	115.451	87.2426	79.1481	0.280254	0.131277	0.322871	1.90969	1.43379	1.29615	53.9094	-2.79148	1.10123e-08	2.96818e-07	DOWN	chloride channel, voltage-sensitive 1 [Source:MGI Symbol;Acc:MGI:88417]	[GO:0016020:membrane][GO:0055085:transmembrane transport][GO:0005247:voltage-gated chloride channel activity][GO:0006821:chloride transport][GO:0016021:integral component of membrane][GO:0005886:plasma membrane][GO:0006811:ion transport][GO:0005887:integral component of plasma membrane][GO:0042803:protein homodimerization activity][GO:0005244:voltage-gated ion channel activity][GO:0034765:regulat…	-	-
ENSMUSG00000024797	19	6067842	6077231	9928	-	Vps51	209.449	195.393	220.73	520.433	456.428	431.485	4.95203	4.64508	5.08106	11.4083	9.94081	9.36423	338.986	-1.17385	1.10562e-08	2.97613e-07	DOWN	VPS51 GARP complex subunit [Source:MGI Symbol;Acc:MGI:1915755]	[GO:0005794:Golgi apparatus][GO:0005794:Golgi apparatus][GO:0003674:molecular_function][GO:0005794:Golgi apparatus][GO:0015031:protein transport][GO:0005829:cytosol][GO:0016020:membrane][GO:0016020:membrane][GO:0043231:intracellular membrane-bounded organelle][GO:0005730:nucleolus][GO:0006869:lipid transport][GO:0005768:endosome][GO:0005802:trans-Golgi network][GO:0055037:recycling endosome][GO:0…	-	-
ENSMUSG00000037474	1	191537356	191575544	22396	-	Dtl	1115.31	1244.81	677.293	2483.11	2168.3	2282.53	15.0306	16.8678	8.88675	31.026	26.918	28.2356	1661.89	-1.18901	1.18525e-08	3.1863e-07	DOWN	denticleless E3 ubiquitin protein ligase [Source:MGI Symbol;Acc:MGI:1924093]	[GO:0005515:protein binding][GO:0016020:membrane][GO:0005634:nucleus][GO:0005634:nucleus][GO:0005634:nucleus][GO:0005829:cytosol][GO:0005737:cytoplasm][GO:0005694:chromosome][GO:0005856:cytoskeleton][GO:0006974:cellular response to DNA damage stimulus][GO:0006974:cellular response to DNA damage stimulus][GO:0016567:protein ubiquitination][GO:0005730:nucleolus][GO:0031965:nuclear membrane][GO:0048…	-	-
ENSMUSG00000073131	X	71815924	71839757	16157	+	Vma21	299.337	313.947	315.993	620.551	606.442	667.652	4.06959	4.29164	4.18267	7.82201	7.59493	8.33185	470.654	-1.02749	1.21171e-08	3.25317e-07	DOWN	VMA21 vacuolar H+-ATPase homolog (S. cerevisiae) [Source:MGI Symbol;Acc:MGI:1914298]	[GO:0070072:vacuolar proton-transporting V-type ATPase complex assembly][GO:0016020:membrane][GO:0016021:integral component of membrane][GO:0031410:cytoplasmic vesicle][GO:0005783:endoplasmic reticulum][GO:0005789:endoplasmic reticulum membrane][GO:0005789:endoplasmic reticulum membrane][GO:0012507:ER to Golgi transport vesicle membrane][GO:0033116:endoplasmic reticulum-Golgi intermediate compart…	-	-
ENSMUSG00000110365	7	13192117	13197215	2720	-	Gm38947	0	0	0	39.6864	28.7262	44.6804	0	0	0	0.855566	0.615295	0.953627	18.8488	-7.82159	1.23842e-08	3.3227e-07	DOWN	predicted gene, 38947 [Source:MGI Symbol;Acc:MGI:5621832]	-	-	-
ENSMUSG00000032850	5	118190736	118245116	12293	-	Rnft2	157.086	111.235	77.8364	362.59	343.651	331.911	2.24216	1.59642	1.08168	4.79838	4.51845	4.34861	230.718	-1.57878	1.24072e-08	3.32596e-07	DOWN	ring finger protein, transmembrane 2 [Source:MGI Symbol;Acc:MGI:2442859]	[GO:0016020:membrane][GO:0016021:integral component of membrane][GO:0046872:metal ion binding][GO:0003674:molecular_function][GO:0008150:biological_process][GO:0005575:cellular_component][GO:0016020:membrane][GO:0016021:integral component of membrane][GO:0046872:metal ion binding][GO:0003674:molecular_function][GO:0008150:biological_process][GO:0005575:cellular_component]	-	-
ENSMUSG00000085949	2	172288133	172290520	430	+	Gm14275	3.49081	0	0	40.5884	63.836	53.6164	0.513438	0	0	5.53495	8.64911	7.23869	26.9219	-5.46964	1.24768e-08	3.34099e-07	DOWN	predicted gene 14275 [Source:MGI Symbol;Acc:MGI:3649537]	-	-	-
ENSMUSG00000041734	3	87078593	87174747	16674	-	Kirrel	433.733	420.059	239.318	1039.06	822.421	878.288	3.76912	3.67033	2.02479	8.37164	6.58349	7.00577	638.814	-1.32206	1.26932e-08	3.39673e-07	DOWN	kirre like nephrin family adhesion molecule 1 [Source:MGI Symbol;Acc:MGI:1891396]	[GO:0016020:membrane][GO:0016021:integral component of membrane][GO:0005886:plasma membrane][GO:0048471:perinuclear region of cytoplasm][GO:0005515:protein binding][GO:0005886:plasma membrane][GO:0005886:plasma membrane][GO:0098609:cell-cell adhesion][GO:0098609:cell-cell adhesion][GO:0005911:cell-cell junction][GO:0005911:cell-cell junction][GO:0001933:negative regulation of protein phosphorylat…	-	-
ENSMUSG00000025264	X	151087094	151096543	9827	-	Tsr2	485.222	574.471	707.498	1191.49	1228.84	1187.22	8.06734	9.60361	11.4525	18.3667	18.8204	18.1185	895.792	-1.03165	1.3153e-08	3.50835e-07	DOWN	TSR2 20S rRNA accumulation [Source:MGI Symbol;Acc:MGI:1916749]	-	-	-
ENSMUSG00000029098	5	35583040	35615352	23530	+	Acox3	244.357	279.552	240.48	552.904	558.565	520.845	3.88694	4.47118	3.72434	8.15425	8.18467	7.60489	399.45	-1.09289	1.34381e-08	3.57975e-07	DOWN	acyl-Coenzyme A oxidase 3, pristanoyl [Source:MGI Symbol;Acc:MGI:1933156]	[GO:0055114:oxidation-reduction process][GO:0016627:oxidoreductase activity, acting on the CH-CH group of donors][GO:0003997:acyl-CoA oxidase activity][GO:0006635:fatty acid beta-oxidation][GO:0005777:peroxisome][GO:0071949:FAD binding][GO:0006631:fatty acid metabolic process][GO:0016491:oxidoreductase activity][GO:0006629:lipid metabolic process][GO:0055088:lipid homeostasis][GO:0005739:mitochon…	[mmu00071:Fatty acid degradation][mmu00592:alpha-Linolenic acid metabolism][mmu01040:Biosynthesis of unsaturated fatty acids][mmu03320:PPAR signaling pathway][mmu04146:Peroxisome]	-
ENSMUSG00000017400	11	98036623	98053462	3600	-	Stac2	318.536	268.574	350.845	644.002	711.772	634.461	6.60525	5.59979	7.08324	12.3814	13.5961	12.0764	488.032	-1.08858	1.47055e-08	3.89213e-07	DOWN	SH3 and cysteine rich domain 2 [Source:MGI Symbol;Acc:MGI:2144518]	[GO:0005515:protein binding][GO:0035556:intracellular signal transduction][GO:0016020:membrane][GO:0046872:metal ion binding][GO:0003674:molecular_function][GO:0005886:plasma membrane][GO:0005737:cytoplasm][GO:0005829:cytosol][GO:0042383:sarcolemma][GO:1903078:positive regulation of protein localization to plasma membrane][GO:0031234:extrinsic component of cytoplasmic side of plasma membrane][GO:…	-	-
ENSMUSG00000059326	19	61223957	61228429	9130	-	Csf2ra	288.864	193.198	180.069	520.433	555.373	551.483	8.02345	5.39568	4.8696	13.4024	14.2101	14.0605	381.57	-1.29514	1.57767e-08	4.15157e-07	DOWN	colony stimulating factor 2 receptor, alpha, low-affinity (granulocyte-macrophage) [Source:MGI Symbol;Acc:MGI:1339754]	[GO:0005515:protein binding][GO:0016020:membrane][GO:0004896:cytokine receptor activity][GO:0005515:protein binding][GO:0016020:membrane][GO:0004896:cytokine receptor activity][GO:0016021:integral component of membrane][GO:0009897:external side of plasma membrane][GO:0019221:cytokine-mediated signaling pathway][GO:0004896:cytokine receptor activity][GO:0019955:cytokine binding][GO:0043235:recepto…	-	-
ENSMUSG00000026932	2	26055535	26123220	17089	-	Nacc2	109.96	157.339	96.4243	344.55	320.244	339.571	1.04187	1.49897	0.889512	3.02679	2.79514	2.95331	228.015	-1.45752	1.6465e-08	4.3239e-07	DOWN	nucleus accumbens associated 2, BEN and BTB (POZ) domain containing [Source:MGI Symbol;Acc:MGI:1915241]	[GO:0005515:protein binding][GO:0005634:nucleus][GO:0005634:nucleus][GO:0005634:nucleus][GO:0051260:protein homooligomerization][GO:0042803:protein homodimerization activity][GO:0016575:histone deacetylation][GO:0000978:RNA polymerase II proximal promoter sequence-specific DNA binding][GO:0005730:nucleolus][GO:0005739:mitochondrion][GO:0000122:negative regulation of transcription by RNA polymeras…	-	-
ENSMUSG00000029516	5	115845278	116008947	59947	+	Cit	1050.73	998.189	549.502	2276.56	1901.25	1990.19	6.98489	6.67201	3.5565	14.0312	11.6426	12.144	1461.07	-1.24535	1.80756e-08	4.71722e-07	DOWN	citron [Source:MGI Symbol;Acc:MGI:105313]	[GO:0005524:ATP binding][GO:0006468:protein phosphorylation][GO:0004672:protein kinase activity][GO:0005524:ATP binding][GO:0006468:protein phosphorylation][GO:0004672:protein kinase activity][GO:0005524:ATP binding][GO:0006468:protein phosphorylation][GO:0035556:intracellular signal transduction][GO:0004674:protein serine/threonine kinase activity][GO:0004672:protein kinase activity][GO:0000281:…	-	-
ENSMUSG00000015659	17	6042196	6079741	8053	-	Serac1	359.553	222.47	206.789	658.434	628.785	680.418	5.67511	3.53069	3.17779	9.63548	9.14232	9.85796	459.408	-1.31683	1.8583e-08	4.84656e-07	DOWN	serine active site containing 1 [Source:MGI Symbol;Acc:MGI:2447813]	[GO:0016020:membrane][GO:0016021:integral component of membrane][GO:0005783:endoplasmic reticulum][GO:0031012:extracellular matrix][GO:0006629:lipid metabolic process][GO:0005739:mitochondrion][GO:0005783:endoplasmic reticulum][GO:0005739:mitochondrion][GO:0008654:phospholipid biosynthetic process][GO:0030198:extracellular matrix organization][GO:0044233:mitochondria-associated endoplasmic reticu…	-	-
[truncated: 807 more rows]

## Sheet: diff_sig_up_Zfp771-KO_mESCs
geneid	chr	start	end	length	strand	name	Zfp771.2	Zfp771.3	Zfp771.1	WT.2	WT.1	WT.3	Zfp771.2_FPKM	Zfp771.3_FPKM	Zfp771.1_FPKM	WT.2_FPKM	WT.1_FPKM	WT.3_FPKM	baseMean	log2FC	Pvalue	Padj	trend	Description	GO	Pathway	TF
[truncated: 2,080 more rows]

## Sheet: diff_sig_down_Zfp771-KO_N2B27
geneid	chr	start	end	length	strand	name	Zfp771.1	Zfp771.3	Zfp771.2	WT1.1	WT1.3	WT1.2	Zfp771.1_FPKM	Zfp771.3_FPKM	Zfp771.2_FPKM	WT1.1_FPKM	WT1.3_FPKM	WT1.2_FPKM	baseMean	log2FC	Pvalue	Padj	trend	Description	GO	Pathway	TF
[truncated: 3,067 more rows]

[truncated: 4 more sheets: diff_sig_up_Zfp771-KO_N2B27, GO_gene_num_Zfp771-KO_mESCs, GO_gene_num_Zfp771-KO_N2B27, pathway_stats_Zfp771-KO_N2B27]
